# Supplementary material for: Acid-catalysed intramolecular Friedel–Crafts annulation of hetero-atom-functionalized para-quinone methides: access to O-, S- and N-based heterocycles
Source: Royal Society of Chemistry journal article supplement (doi:10.1039/d3ob00502j), 2023-01-01

## Supporting information for

### Acid-catalysed intramolecular Friedel-Craft annulation of hetero-atom-functionalized *para*-quinone methides: Access to *O*-, *S*- and *N*-based heterocycles

Sonam Sharma,<sup>#</sup> Gurdeep Singh,<sup>#</sup> Rekha, Munnu Kumar and Ramasamy Vijaya Anand\*

*Department of Chemical Sciences, Indian Institute of Science Education and Research  
(IISER) Mohali, Sector 81, Knowledge City, S. A. S. Nagar, Manauli (PO), Punjab –  
140306. India.*

*E-mail:* [rvijayan@iisermohali.ac.in](mailto:rvijayan@iisermohali.ac.in)

<sup>#</sup> These authors contributed equally

#### *Table of Contents*

|                                                        |         |
|--------------------------------------------------------|---------|
| 1. Optimization table for <b>6a</b>                    | S3      |
| 2. Characterization of <b>1b</b> to <b>1u</b>          | S3–S11  |
| 3. Characterization of <b>3b</b> to <b>3j</b>          | S11–S14 |
| 4. Characterization of <b>5b</b> to <b>5e</b>          | S14–S15 |
| 5. Characterization of products <b>2b</b> to <b>2u</b> | S16–S23 |
| 6. Characterization of products <b>4b</b> to <b>4j</b> | S23–S26 |
| 7. Characterization of products <b>6b</b> to <b>6e</b> | S26–S28 |
| 8. Unsuccessful attempts                               | S28     |
| 9. References                                          | S28     |
| 10. NMR spectra of <b>1a</b> to <b>1u</b>              | S29–S50 |
| 11. NMR spectra of <b>3a</b> to <b>3j</b>              | S50–S60 |
| 12. NMR spectra of <b>5a</b> to <b>5e</b>              | S60–S65 |
| 13. NMR spectra of <b>2a</b> to <b>2u</b>              | S65–S86 |

|                                                  |          |
|--------------------------------------------------|----------|
| <b>14.</b> NMR spectra of <b>4a</b> to <b>4j</b> | S87–S96  |
| <b>15.</b> NMR spectra of <b>6a</b> to <b>6e</b> | S97–S102 |
| <b>16.</b> NMR spectra of <b>7a</b>              | S103     |
| <b>17.</b> NMR spectra of <b>8a</b>              | S104     |
| <b>18.</b> NMR spectra of <b>9a</b>              | S105     |
| <b>19.</b> NMR spectra of <b>10a</b>             | S106     |

**Table 5.** Optimization study<sup>a</sup>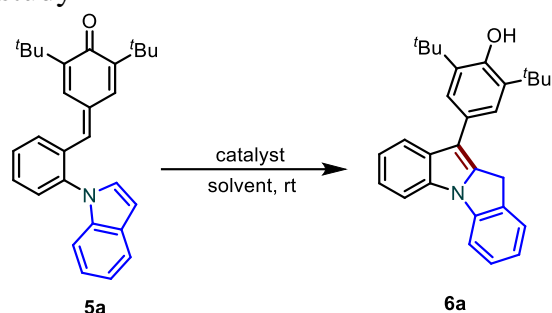

| Entry    | Acid        | Solvent                         | Time [min] | Yield [%] <sup>b</sup> |
|----------|-------------|---------------------------------|------------|------------------------|
| 1        | TfOH        | CH <sub>2</sub> Cl <sub>2</sub> | 30         | 86                     |
| 2        | TfOH        | CH <sub>3</sub> CN              | 30         | 82                     |
| 3        | TfOH        | Acetone                         | 45         | 80                     |
| <b>4</b> | <b>TfOH</b> | <b>PhMe</b>                     | <b>30</b>  | <b>90</b>              |
| 5        | TfOH        | THF                             | 120        | trace                  |
| 6        | TfOH        | DMF                             | 720        | nr                     |
| 7        | TfOH        | 1,4-dioxane                     | 120        | 50                     |

<sup>a</sup>All reactions were carried out using **5a** (0.098 mmol) in 1.5 mL of PhMe. Yields reported are isolated yields

## 2. Characterization of **1b** to **1u**:

**2,6-di-tert-butyl-4-(2-(p-tolyl)oxy)benzylidene)cyclohexa-2,5-dien-1-one (1b)**: Yellow solid

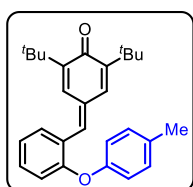

(1.12 g, 53% yield); m. p. = 120 – 122 °C;  $R_f$  = 0.5 (5% EtOAc in hexane);

<sup>1</sup>H NMR (400 MHz, CDCl<sub>3</sub>) 7.52 (d,  $J$  = 2.3 Hz, 1H), 7.49 (dd,  $J$  = 7.6 1.0 Hz, 1H), 7.45 (s, 1H), 7.33–7.29 (m, 1H), 7.18 – 7.14 (m, 3H), 7.05 (d,  $J$  =

2.3 Hz, 1H), 6.96 – 6.92 (m, 2H), 6.87 (dd,  $J$  = 8.2, 0.8 Hz, 1H), 2.35 (s, 3H), 1.33 (s, 9H) 1.32

(s, 9H); <sup>13</sup>C{<sup>1</sup>H} NMR (100 MHz, CDCl<sub>3</sub>)  $\delta$  186.8, 157.0, 154.2, 149.3, 147.7, 138.0, 135.4,

133.7, 132.3, 132.1, 130.8, 130.6, 128.2, 127.0, 122.9, 119.4, 117.8, 35.6, 35.1, 29.7, 29.6,

20.9, 20.88; FT-IR (thin film, neat): 2954, 1613, 1575, 1475, 1301, 797 cm<sup>-1</sup>; HRMS (ESI):

$m/z$  calcd for C<sub>28</sub>H<sub>31</sub>O<sub>2</sub> [M-H]<sup>-</sup> : 399.2324; found : 399.2327.

**2,6-di-*tert*-butyl-4-(2-(4-ethylphenoxy)benzylidene)cyclohexa-2,5-dien-1-one (1c):** Yellow

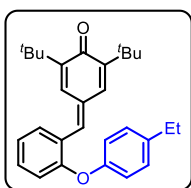

solid (1.20 g, 59% yield); m. p. = 140–142 °C;  $R_f$  = 0.5 (5% EtOAc in hexane);

$^1\text{H}$  NMR (400 MHz,  $\text{CDCl}_3$ ) 7.52 (d,  $J$  = 2.3 Hz, 1H), 7.48 (dd,  $J$  = 7.5, 0.7

Hz, 1H), 7.44 (s, 1H), 7.34–7.29 (m, 1H), 7.20–7.14 (m, 3H), 7.04 (d,  $J$  =

2.3 Hz, 1H), 6.98–6.94 (m, 2H), 6.90–6.88 (m, 1H), 2.65 (q,  $J$  = 7.6 Hz, 2H), 1.32 (s, 9H),

1.31 (s, 9H), 1.25 (t,  $J$  = 7.6 Hz, 3H);  $^{13}\text{C}\{^1\text{H}\}$  NMR (100 MHz,  $\text{CDCl}_3$ )  $\delta$  186.8, 157.0, 154.4,

149.3, 147.7, 140.1, 138.0, 135.4, 132.3, 132.1, 130.8, 129.4, 128.2, 127.1, 122.9, 119.4, 117.9,

35.6, 35.1, 29.7, 29.6, 28.3, 15.9; FT-IR (thin film, neat): 2956, 1613, 1451, 1359, 1236, 742

$\text{cm}^{-1}$ ; HRMS (ESI):  $m/z$  calcd for  $\text{C}_{29}\text{H}_{35}\text{O}_2$   $[\text{M}+\text{H}]^+$  : 415.2637; found : 415.2633.

**2,6-di-*tert*-butyl-4-(2-(4-(*tert*-butyl)phenoxy)benzylidene)cyclohexa-2,5-dien-1-one (1d):**

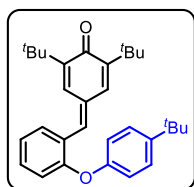

Yellow solid (0.35 g, 39% yield); m. p. = 137–138 °C;  $R_f$  = 0.5 (5% EtOAc

in hexane);  $^1\text{H}$  NMR (400 MHz,  $\text{CDCl}_3$ )  $\delta$  7.52 (d,  $J$  = 2.2 Hz, 1H), 7.49 (d,

$J$  = 7.6 Hz, 1H), 7.43 (s, 1H), 7.39–7.36 (m, 2H), 7.34–7.30 (m, 1H), 7.16

(t,  $J$  = 7.5 Hz, 1H), 7.03 (d,  $J$  = 2.3 Hz, 1H), 6.98–6.95 (m, 2H), 6.92 (d,  $J$  = 8.2 Hz, 1H), 1.33

(s, 9H), 1.32 (s, 9H), 1.31 (s, 9H);  $^{13}\text{C}\{^1\text{H}\}$  NMR (100 MHz,  $\text{CDCl}_3$ )  $\delta$  186.8, 156.8, 154.2,

149.3, 147.7, 147.0, 138.0, 135.4, 132.3, 132.1, 130.8, 128.2, 127.2, 126.9, 123.0, 118.9, 118.1,

35.6, 35.1, 34.5, 31.6, 29.7, 29.6; FT-IR (thin film, neat): 2957, 1613, 1474, 1390, 1301, 755

$\text{cm}^{-1}$ ; HRMS (ESI):  $m/z$  calcd for  $\text{C}_{31}\text{H}_{39}\text{O}_2$   $[\text{M}+\text{H}]^+$  : 443.2950; found : 443.2946.

**2,6-di-*tert*-butyl-4-(2-(3,5-dimethylphenoxy)benzylidene)cyclohexa-2,5-dien-1-one (1e):**

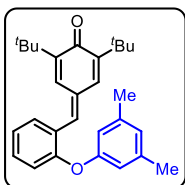

Yellow solid (0.70 g, 32% yield); m. p. = 123–125 °C;  $R_f$  = 0.5 (5% EtOAc

in hexane);  $^1\text{H}$  NMR (400 MHz,  $\text{CDCl}_3$ )  $\delta$  7.51 (d,  $J$  = 2.3 Hz, 1H), 7.48 (dd,

$J$  = 7.7, 1.2 Hz, 1H), 7.44 (s, 1H), 7.33–7.28 (m, 1H), 7.16–7.09 (m, 2H),

7.04 (d,  $J$  = 2.3 Hz, 1H), 6.87 (dd,  $J$  = 8.3, 0.9 Hz, 1H), 6.84 (d,  $J$  = 2.4 Hz, 1H), 6.77 (dd,  $J$  =

8.2, 2.6 Hz, 1H), 2.25–2.24 (m, 6H), 1.32 (s, 9H), 1.31 (s, 9H);  $^{13}\text{C}\{^1\text{H}\}$  NMR (100 MHz,

$\text{CDCl}_3$ )  $\delta$  186.8, 157.0, 154.4, 149.3, 147.7, 138.6, 138.1, 135.4, 132.4, 132.3, 132.0, 130.9,

130.7, 128.3, 127.0, 122.8, 120.7, 117.8, 116.7, 35.6, 35.1, 29.7, 29.6, 20.1, 19.2; FT-IR (thin film, neat): 2921, 1740, 1616, 1457, 1251, 742  $\text{cm}^{-1}$ ; HRMS (ESI):  $m/z$  calcd for  $\text{C}_{29}\text{H}_{35}\text{O}_2$   $[\text{M}+\text{H}]^+$  : 415.2637; found :415.2622.

**2,6-di-*tert*-butyl-4-(2-(4-ethoxyphenoxy)benzylidene)cyclohexa-2,5-dien-1-one (1f):**

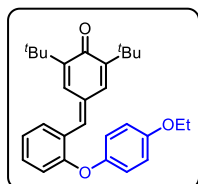

Yellow solid (0.95 g, 60% yield); m. p. = 140–142 °C  $R_f$  = 0.4 (5% EtOAc in hexane);  $^1\text{H}$  NMR (400 MHz,  $\text{CDCl}_3$ )  $\delta$  7.52 (d,  $J$  = 2.2 Hz, 1H), 7.48 – 7.46 (m, 2H), 7.31 – 7.27 (m, 1H), 7.14 – 7.10 (m, 1H), 7.06 (d,  $J$  = 2.3 Hz, 1H), 7.00 – 6.96 (m, 2H), 6.92 – 6.88 (m, 2H), 6.80 (dd,  $J$  = 8.2, 0.7 Hz, 1H), 4.03 (q,  $J$  = 7.0 Hz, 2H), 1.43 (t,  $J$  = 7.0 Hz, 3H), 1.32 (s, 9H), 1.31 (s, 9H);  $^{13}\text{C}\{^1\text{H}\}$  NMR (100 MHz,  $\text{CDCl}_3$ )  $\delta$  186.8, 157.7, 155.8, 149.5, 149.3, 147.7, 138.1, 135.4, 132.2, 132.1, 130.7, 128.3, 126.4, 122.5, 121.2, 116.8, 115.7, 64.0, 35.6, 35.2, 29.7, 29.6, 15.0; FT-IR (thin film, neat): 2923, 1614, 1503, 1360, 1228, 753  $\text{cm}^{-1}$ ; HRMS (ESI):  $m/z$  calcd for  $\text{C}_{29}\text{H}_{33}\text{O}_2$   $[\text{M}-\text{H}]^-$  : 429.2430; found : 429.2433.

**2,6-di-*tert*-butyl-4-(2-(3-methoxyphenoxy)benzylidene)cyclohexa-2,5-dien-1-one (1g):**

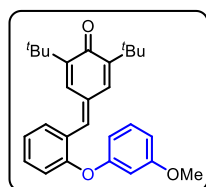

yellow solid (1.00 g, 24% yield); m. p. = 127– 129 °C;  $R_f$  = 0.4 (5% EtOAc in hexane);  $^1\text{H}$  NMR (400 MHz,  $\text{CDCl}_3$ )  $\delta$  7.51 – 7.48 (m, 2H), 7.39 (s, 1H), 7.35 (td,  $J$  = 7.9, 1.5 Hz, 1H), 7.27 – 7.23 (m, 1H), 7.20 (t,  $J$  = 7.4 Hz, 1H), 7.03 (d,  $J$  = 2.3 Hz, 1H), 6.96 (dd,  $J$  = 8.2, 0.8 Hz, 1H), 6.71 – 6.68 (m, 1H), 6.61 – 6.58 (m, 2H), 3.78 (s, 3H), 1.32 (s, 9H), 1.31 (s, 9H);  $^{13}\text{C}\{^1\text{H}\}$  NMR (100 MHz,  $\text{CDCl}_3$ )  $\delta$  186.8, 161.2, 158.0, 156.1, 149.4, 147.7, 137.7, 135.3, 132.5, 132.1, 130.8, 130.5, 128.2, 127.5, 123.5, 118.9, 111.2, 109.5, 105.2, 55.54, 55.5, 35.6, 35.1, 29.7, 29.6; FT-IR (thin film, neat): 2923, 1693, 1483, 1273, 1153, 754  $\text{cm}^{-1}$ ; HRMS (ESI):  $m/z$  calcd for  $\text{C}_{28}\text{H}_{33}\text{O}_3$   $[\text{M}+\text{H}]^+$  417.2430; found : 417.2430.

**2,6-di-tert-butyl-4-(2(3,5-dimethoxyphenoxy)benzylidene)cyclohexa-2,5-dien-1-one (1h):**

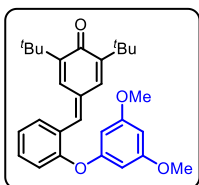

Yellow solid (0.26 g, 32% yield); m. p. = 132–134 °C;  $R_f$  = 0.3 (5% EtOAc in hexane);  $^1\text{H}$  NMR (400 MHz,  $\text{CDCl}_3$ )  $\delta$  7.59 (d,  $J$  = 2.2 Hz, 1H), 7.36 – 7.32 (m, 2H), 7.29 (s, 1H), 7.12 – 7.07 (m, 2H), 6.98 – 6.96 (m, 3H), 6.57 (s, 1H), 3.93 (s, 3H), 3.81 (s, 3H), 1.33 (s, 9H), 1.30 (s, 9H);  $^{13}\text{C}\{^1\text{H}\}$  NMR (100 MHz,  $\text{CDCl}_3$ )  $\delta$  186.5, 158.0, 151.5, 150.0, 149.1, 147.4, 145.7, 137.4, 135.6, 131.1, 130.1, 128.0, 123.2, 120.1, 117.6, 113.5, 104.4, 56.4, 56.32, 56.3, 35.6, 35.1, 29.8, 29.6; FT-IR (thin film, neat): 2956, 1456, 1229, 1143, 1091, 756  $\text{cm}^{-1}$ ; HRMS (ESI):  $m/z$  calcd for  $\text{C}_{29}\text{H}_{35}\text{O}_4$   $[\text{M}+\text{H}]^+$  : 447.2535; found : 447.2536.

**2,6-di-tert-butyl-4-(2-(2-methoxy-4-methylphenoxy)benzylidene)cyclohexa-2,5-dien-1-**

**one (1i):** yellow solid (1.80 g, 62% yield); m. p. = 137–139 °C;  $R_f$  = 0.4 (5% EtOAc in hexane);

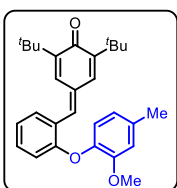

$^1\text{H}$  NMR (400 MHz,  $\text{CDCl}_3$ )  $\delta$  7.57 (s, 1H), 7.54 (d,  $J$  = 2.3 Hz, 1H), 7.45 (dd,  $J$  = 7.6, 1.1 Hz, 1H), 7.27 – 7.23 (m, 1H), 7.11 – 7.07 (m, 2H), 6.90 (d,  $J$  = 8.0 Hz, 1H), 6.83 (d,  $J$  = 1.6 Hz, 1H), 6.77 – 6.74 (m, 1H), 6.69 (dd,  $J$  = 8.3 0.9 Hz, 1H), 3.79 (s, 3H), 2.37 (s, 3H), 1.32 (s, 9H), 1.31 (s, 9H);  $^{13}\text{C}\{^1\text{H}\}$  NMR (100 MHz,  $\text{CDCl}_3$ )  $\delta$  186.9, 157.7, 151.3, 149.1, 147.5, 142.0, 138.5, 135.8, 135.6, 132.0, 131.9, 130.6, 128.5, 125.8, 122.1, 121.8, 121.7, 115.7, 113.9, 56.0, 55.99, 35.6, 35.1, 29.7, 29.6, 21.54, 21.5; FT-IR (thin film, neat): 2955, 1612, 1473, 1359, 1266, 747  $\text{cm}^{-1}$ ; HRMS (ESI):  $m/z$  calcd for  $\text{C}_{29}\text{H}_{35}\text{O}_3$   $[\text{M}+\text{H}]^+$  : 431.2586; found : 431.2586.

**2,6-di-tert-butyl-4-(2-(4-fluorophenoxy)benzylidene)cyclohexa-2,5-dien-1-one (1j):**

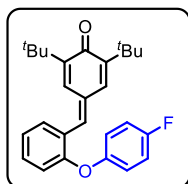

Yellow solid (0.85 g, 33% yield); m. p. = 146–148 °C;  $R_f$  = 0.5 (5% EtOAc in hexane);  $^1\text{H}$  NMR (400 MHz,  $\text{CDCl}_3$ )  $\delta$  7.50 – 7.48 (m, 2H), 7.41 (s, 1H), 7.35 – 7.31 (m, 1H), 7.20 – 7.16 (m, 1H), 7.08 – 6.98 (m, 5H), 6.85 (d,  $J$  = 8.2 Hz, 1H), 1.32 (s, 9H), 1.31 (s, 9H);  $^{13}\text{C}\{^1\text{H}\}$  NMR (100 MHz,  $\text{CDCl}_3$ )  $\delta$  186.8, 159.2 (d,  $J_{\text{C-F}}$  = 241.2 Hz), 156.7, 152.4 (d,  $J_{\text{C-F}}$  = 10.2 Hz), 149.4, 147.8, 137.5, 136.2, 132.5, 132.2,

130.8, 128.1, 127.0, 123.2, 120.9 (d,  $J_{C-F} = 8.2$  Hz), 117.6, 116.7 (d,  $J_{C-F} = 23.2$  Hz), 35.6, 35.2, 29.7, 29.6;  $^{19}\text{F}\{^1\text{H}\}$  NMR (376 MHz,  $\text{CDCl}_3$ )  $\delta$  -119.04; FT-IR (thin film, neat): 2955, 1695, 1618, 1450, 1265, 757  $\text{cm}^{-1}$ ; HRMS (ESI):  $m/z$  calcd for  $\text{C}_{27}\text{H}_{30}\text{FO}_2$   $[\text{M}+\text{H}]^+$  : 405.2230; found : 405.2243.

**2,6-di-*tert*-butyl-4-(2-(4-chlorophenoxy)benzylidene)cyclohexa-2,5-dien-1-one (Ik):**

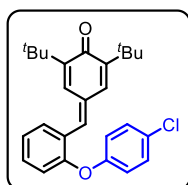

Yellow solid (0.28 g, 52% yield); m. p. = 131–133 °C;  $R_f = 0.5$  (5% EtOAc in hexane);  $^1\text{H}$  NMR (400 MHz,  $\text{CDCl}_3$ )  $\delta$  7.50 – 7.47 (m, 2H), 7.37 – 7.29 (m, 4H), 7.23 – 7.19 (m, 1H), 7.01 (d,  $J = 2.3$  Hz, 1H), 6.97 – 6.93 (m, 2H), 6.91 (dd,  $J = 8.0, 0.6$  Hz, 1H), 1.31 (s, 9H), 1.30 (s, 9H);  $^{13}\text{C}\{^1\text{H}\}$  NMR (100 MHz,  $\text{CDCl}_3$ )  $\delta$  186.8, 155.9, 155.4, 149.5, 147.9, 137.2, 135.2, 132.6, 132.3, 130.9, 130.1, 129.0, 128.0, 127.5, 123.8, 120.4, 118.6, 35.6, 35.2, 29.7, 29.6; FT-IR (thin film, neat): 2955, 1692, 1612, 1479, 1234, 757  $\text{cm}^{-1}$ ; HRMS (ESI):  $m/z$  calcd for  $\text{C}_{27}\text{H}_{28}\text{ClO}_2$   $[\text{M}-\text{H}]^-$  : 419.1778; found : 419.1763.

**4-(2-(2-bromophenoxy)benzylidene)-2,6-di-*tert*-butylcyclohexa-2,5-dien-1-one (Il):**

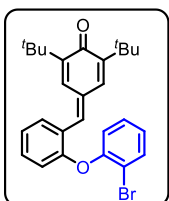

Yellow solid (0.76 g, 43% yield); m. p. = 122–124 °C;  $R_f = 0.5$  (5% EtOAc in hexane);  $^1\text{H}$  NMR (400 MHz,  $\text{CDCl}_3$ )  $\delta$  7.66 (d,  $J = 7.9$  Hz, 1H), 7.51 – 7.48 (m, 3H), 7.33 – 7.28 (m, 2H), 7.19 (t,  $J = 7.5$  Hz, 1H), 7.09 – 7.05 (m, 2H), 7.01 (d,  $J = 8.1$  Hz, 1H), 6.75 (d,  $J = 8.2$  Hz, 1H), 1.33 (s, 9H), 1.31 (s, 9H);  $^{13}\text{C}\{^1\text{H}\}$  NMR (100 MHz,  $\text{CDCl}_3$ )  $\delta$  186.8, 156.1, 153.1, 149.4, 147.8, 137.5, 135.3, 134.2, 132.5, 132.2, 130.8, 129.0, 128.1, 126.8, 125.9, 123.4, 121.5, 117.1, 115.4, 35.6, 35.2, 29.7, 29.6; FT-IR (thin film, neat): 2921, 1616, 1464, 1360, 1237, 750  $\text{cm}^{-1}$ ; HRMS (ESI):  $m/z$  calcd for  $\text{C}_{27}\text{H}_{28}\text{BrO}_2$   $[\text{M}-\text{H}]^-$  : 463.1273; found : 463.1268.

**2,6-di-*tert*-butyl-4-(2-(2,4-dichlorophenoxy)benzylidene)cyclohexa-2,5-dien-1-one (Im):**

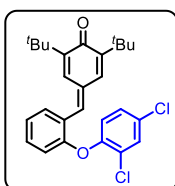

Yellow solid (2.50 g, 58% yield); m. p. = 160–162 °C;  $R_f = 0.5$  (5% EtOAc in hexane);  $^1\text{H}$  NMR (400 MHz,  $\text{CDCl}_3$ )  $\delta$  7.50 – 7.47 (m, 3H), 7.41 (s, 1H), 7.33 (td,  $J = 7.8, 1.6$  Hz, 1H), 7.24 – 7.19 (m, 2H), 7.04 (d,  $J = 2.3$  Hz, 1H), 6.94 (d,

$J = 8.7$  Hz, 1H), 6.75 (dd,  $J = 8.2, 0.8$  Hz, 1H), 1.32 (s, 9H), 1.30 (s, 9H);  $^{13}\text{C}\{^1\text{H}\}$  NMR (100 MHz,  $\text{CDCl}_3$ )  $\delta$  186.8, 155.7, 150.8, 149.5, 147.9, 136.9, 135.2, 132.7, 132.3, 130.82, 130.8, 130.1, 128.4, 128.0, 127.0, 126.8, 123.7, 122.2, 117.0, 35.6, 35.2, 29.7, 29.6; FT-IR (thin film, neat): 2955, 1774, 1470, 1253, 1100, 744  $\text{cm}^{-1}$ ; HRMS (ESI):  $m/z$  calcd for  $\text{C}_{27}\text{H}_{27}\text{Cl}_2\text{O}_2$  [ $\text{M}-\text{H}$ ] $^-$  : 453.1388; found : 453.1366.

**2,6-di-*tert*-butyl-4-(2-(2,4-dibromophenoxy)benzylidene)cyclohexa-2,5-dien-1-one (1n):**

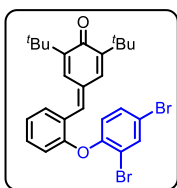

Yellow solid (1.55 g, 56% yield); m. p. = 145–147 °C;  $R_f = 0.5$  (5% EtOAc in hexane)  $^1\text{H}$  NMR (400 MHz,  $\text{CDCl}_3$ )  $\delta$  7.80 (d,  $J = 2.3$  Hz, 1H), 7.51 – 7.49 (m, 1H), 7.47 (d,  $J = 2.2$  Hz, 1H), 7.41 – 7.39 (m, 2H), 7.34 (td,  $J = 7.8, 1.5$  Hz, 1H), 7.22 (t,  $J = 7.5$  Hz, 1H), 7.04 (d,  $J = 2.3$  Hz, 1H), 6.85 (d,  $J = 8.7$  Hz, 1H), 6.78 – 6.76 (m, 1H), 1.32 (s, 9H), 1.30 (s, 9H);  $^{13}\text{C}\{^1\text{H}\}$  NMR (100 MHz,  $\text{CDCl}_3$ )  $\delta$  186.8, 155.5, 152.7, 149.5, 148.0, 136.9, 136.4, 135.2, 132.7, 132.4, 132.0, 130.8, 128.0, 127.0, 123.9, 122.2, 117.4 (2C), 116.1, 35.6, 35.2, 29.7, 29.6; FT-IR (thin film, neat): 2921, 1616, 1462, 1360, 1238, 755  $\text{cm}^{-1}$ ; HRMS (ESI):  $m/z$  calcd for  $\text{C}_{27}\text{H}_{27}\text{Br}_2\text{O}_2$  [ $\text{M}-\text{H}$ ] $^-$  : 541.0378; found : 541.0381.

**4-(2-(4-bromo-2-methoxyphenoxy)benzylidene)-2,6-di-*tert*-butylcyclohexa-2,5-dien-1-**

**one (1o):** Yellow solid (1.20 g, 43% yield); m. p. = 139–141 °C;  $R_f = 0.4$  (5% EtOAc in

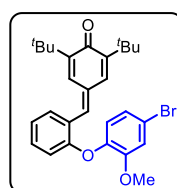

hexane);  $^1\text{H}$  NMR (400 MHz,  $\text{CDCl}_3$ )  $\delta$  7.50 (d,  $J = 2.2$  Hz, 1H), 7.48 – 7.45 (m, 2H), 7.30 – 7.26 (m, 1H), 7.15 – 7.12 (m, 2H), 7.09 – 7.06 (m, 2H), 6.87 (d,  $J = 8.5$  Hz, 1H), 6.71 (dd,  $J = 8.2, 0.7$  Hz, 1H), 3.80 (s 3H), 1.32 (s, 9H), 1.31 (s, 9H);  $^{13}\text{C}\{^1\text{H}\}$  NMR (100 MHz,  $\text{CDCl}_3$ )  $\delta$  186.8, 156.8, 152.2, 149.3, 147.7, 143.9, 137.8, 135.4, 132.3, 132.1, 130.7, 128.3, 126.2, 124.2, 122.9, 122.8, 117.9, 116.5, 116.1, 56.32, 56.3, 35.6, 35.2; FT-IR (thin film, neat): 2955, 1612, 1452, 1359, 1230, 751  $\text{cm}^{-1}$ ; HRMS (ESI):  $m/z$  calcd for  $\text{C}_{28}\text{H}_{32}\text{BrO}_3$  [ $\text{M}+\text{H}$ ] $^+$  : 495.1535; found : 495.1522.



**4-(2-([1,1'-biphenyl]-4-yloxy)benzylidene)-2,6-di-*tert*-butylcyclohexa-2,5-dien-1-one (1p):**

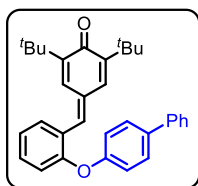

Yellow solid (0.80 g, 45% yield); m. p. = 183–185 °C;  $R_f$  = 0.5 (5% EtOAc in hexane);  $^1\text{H NMR}$  (400 MHz,  $\text{CDCl}_3$ )  $\delta$  7.61 – 7.56 (m, 4H), 7.52 – 7.51

(m, 2H), 7.46 – 7.43 (m, 3H), 7.39 – 7.33 (m, 2H), 7.21 (t,  $J$  = 7.3 Hz, 1H),

7.12 – 7.08 (m, 2H), 7.04 (d,  $J$  = 2.3 Hz, 1H), 7.00 (dd,  $J$  = 8.2, 0.8 Hz, 1H), 1.32 (s, 18H);

$^{13}\text{C}\{^1\text{H}\}$  NMR (100 MHz,  $\text{CDCl}_3$ )  $\delta$  186.8, 156.33, 156.3, 149.4, 147.8, 140.4, 137.7, 137.0,

135.3, 132.5, 132.2, 130.9, 129.0, 128.7, 128.1, 127.5, 127.3, 127.1, 123.5, 119.4, 118.7, 35.6,

35.2, 29.7, 29.6; FT-IR (thin film, neat): FT-IR (thin film, neat): 2955, 1614, 1459, 1360, 1228,

755  $\text{cm}^{-1}$ ; HRMS (ESI):  $m/z$  calcd for  $\text{C}_{33}\text{H}_{35}\text{O}_2$   $[\text{M}+\text{H}]^+$  : 463.2637; found : 463.2654.

**2,6-di-*tert*-butyl-4-(2-(naphthalen-2-yloxy)benzylidene)cyclohexa-2,5-dien-1-one (1q):**

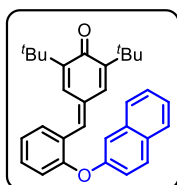

Yellow solid (1.55 g, 57% yield); m. p. = 127–129 °C;  $R_f$  = 0.4 (5% EtOAc in hexane);  $^1\text{H NMR}$  (400 MHz,  $\text{CDCl}_3$ )  $\delta$  7.89 – 7.85 (m, 2H), 7.73 (d,  $J$  = 8.0

Hz, 1H), 7.59 – 7.57 (m, 2H), 7.51 – 7.43 (m, 3H), 7.40 – 7.36 (m, 2H), 7.32 –

7.22 (m, 2H), 7.06 (d,  $J$  = 8.0 Hz, 1H), 7.02 – 7.00 (m, 1H), 1.37 (s, 9H), 1.35 (s, 9H);  $^{13}\text{C}\{^1\text{H}\}$

NMR (100 MHz,  $\text{CDCl}_3$ )  $\delta$  186.8, 156.2, 154.5, 143.4, 147.6, 137.7, 135.3, 134.4, 132.5, 132.2,

130.9, 130.5, 130.3, 128.1, 127.9, 127.6, 127.3, 126.8, 125.1, 123.6, 119.9, 118.9, 114.6, 35.6,

35.1, 29.7, 29.6; FT-IR (thin film, neat): 2954, 1614, 1493, 1360, 1261, 752  $\text{cm}^{-1}$ ; HRMS (ESI):

$m/z$  calcd for  $\text{C}_{31}\text{H}_{33}\text{O}_2$   $[\text{M}+\text{H}]^+$  : 437.2481; found : 437.2471.

**2,6-di-*tert*-butyl-4-(2-((6-methoxynaphthalen-2-yl)oxy)benzylidene)cyclohexa-2,5-dien-1-**

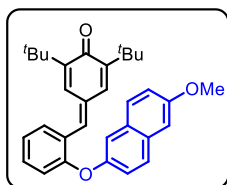

**one (1r):** yellow solid (1.00 g, 89% yield); m. p. = 98–100 °C;  $R_f$  = 0.3 (5%

EtOAc in hexane);  $^1\text{H NMR}$  (400 MHz,  $\text{CDCl}_3$ )  $\delta$  7.76 (d,  $J$  = 8.9 Hz, 1H),

7.63 (d,  $J$  = 9.1 Hz, 1H), 7.56 – 7.53 (m, 2H), 7.49 (s, 1H), 7.38 – 7.32 (m,

2H), 7.26 – 7.14 (m, 4H), 7.05 (s, 1H), 6.94 (d,  $J$  = 8.2 Hz, 1H), 3.92 (s, 3H), 1.34 (s, 9H), 1.33

(s, 9H);  $^{13}\text{C}\{^1\text{H}\}$  NMR (100 MHz,  $\text{CDCl}_3$ )  $\delta$  186.8, 157.3, 156.8, 152.6, 149.3, 147.7, 137.9,

135.3, 132.4, 132.2, 131.6, 130.8, 129.6, 128.9, 128.7, 128.2, 127.2, 123.2, 120.5, 119.7, 118.2,

115.4, 106.0, 55.5, 55.4, 35.6, 35.1, 29.7, 29.6; FT-IR (thin film, neat): 2954, 1609, 1576, 1473, 1231, 739  $\text{cm}^{-1}$ ; HRMS (ESI):  $m/z$  calcd for  $\text{C}_{32}\text{H}_{35}\text{O}_3$   $[\text{M}+\text{H}]^+$  : 467.2586; found : 467.2567.

**4-(2-((6-bromonaphthalen-2-yl)oxy)benzylidene)-2,6-di-*tert*-butylcyclohexa-2,5-dien-1-**

**one (1s):** Yellow solid (0.95 g, 65% yield); m. p. = 127–129 °C;  $R_f$  = 0.4 (5% EtOAc in hexane);

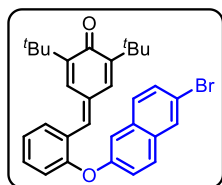

$^1\text{H}$  NMR (400 MHz,  $\text{CDCl}_3$ )  $\delta$  7.97 (d,  $J$  = 1.4 Hz, 1H), 7.75 – 7.68 (m, 1H), 7.56 – 7.48 (m, 4H), 7.37 – 7.33 (m, 2H), 7.28 – 7.23 (m, 3H), 6.98 – 6.96 (m, 2H), 1.29 (s, 9H), 1.27 (s, 9H);  $^{13}\text{C}\{^1\text{H}\}$  NMR (100 MHz,  $\text{CDCl}_3$ )

$\delta$  186.8, 155.8, 155.1, 149.5, 147.9, 137.3, 135.2, 132.9, 132.7, 132.3, 131.4, 130.9, 130.2, 130.0, 129.4, 128.9, 128.1, 127.8, 124.0, 120.9, 119.2, 118.8, 114.2, 35.6, 35.2, 29.7, 29.6; FT-IR (thin film, neat): 2954, 1614, 1493, 1360, 1261, 752  $\text{cm}^{-1}$ ; HRMS (ESI):  $m/z$  calcd for  $\text{C}_{31}\text{H}_{30}\text{BrO}_2$   $[\text{M}-\text{H}]^-$  : 513.1429; found : 513.1442.

**2,6-di-*tert*-butyl-4-(2-methyl-6-phenoxybenzylidene)cyclohexa-2,5-dien-1-one (1t):**

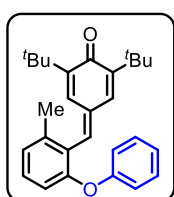

Yellow solid (0.21 g, 25% yield); m. p. = 116–118 °C;  $R_f$  = 0.4 (5% EtOAc in hexane);  $^1\text{H}$  NMR (400 MHz,  $\text{CDCl}_3$ )  $\delta$  7.30 – 7.22 (m, 3H), 7.07 – 7.04 (m, 2H), 7.01 – 6.96 (m, 3H), 6.89 – 6.87 (m, 2H), 6.83 (d,  $J$  = 8.2 Hz, 1H), 2.30 (s, 3H), 1.31 (d,  $J$  = 1.0 Hz, 9H), 1.26 (d,  $J$  = 1.2 Hz, 9H);  $^{13}\text{C}\{^1\text{H}\}$  NMR (100 MHz,  $\text{CDCl}_3$ )

$\delta$  186.9, 157.1, 154.7, 148.5, 147.5, 139.0, 137.5, 134.4, 134.0, 129.8, 129.6, 129.3, 126.9, 125.6, 123.3, 118.5, 116.6, 35.3, 35.1, 29.7, 29.6, 20.75, 20.7; FT-IR (thin film, neat): 2955, 1615, 1455, 1359, 1245, 742  $\text{cm}^{-1}$ ; HRMS (ESI):  $m/z$  calcd for  $\text{C}_{28}\text{H}_{33}\text{O}_2$   $[\text{M}+\text{H}]^+$  : 401.2481; found : 401.2464.

**2,6-di-*tert*-butyl-4-(4-chloro-2-phenoxybenzylidene)cyclohexa-2,5-dien-1-one (1u):**

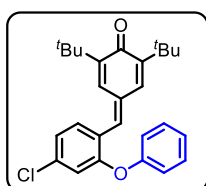

Yellow solid (0.36 g, 45% yield); m. p. = 140–142 °C;  $R_f$  = 0.4 (5% EtOAc in hexane);  $^1\text{H}$  NMR (400 MHz,  $\text{CDCl}_3$ )  $\delta$  7.44 – 7.39 (m, 4H), 7.34 (s, 1H), 7.21 (t,  $J$  = 7.4 Hz, 1H), 7.15 (dd,  $J$  = 8.4, 1.9 Hz, 1H), 7.07 – 7.02 (m, 3H), 6.85 (d,  $J$  = 2.0 Hz, 1H), 1.32 (s, 9H), 1.31 (s, 9H);  $^{13}\text{C}\{^1\text{H}\}$  NMR (100 MHz,  $\text{CDCl}_3$ )  $\delta$  186.8,

157.2, 155.8, 149.7, 148.0, 136.3, 136.2, 135.1, 132.7, 130.3, 127.7, 125.5, 124.8, 123.3, 119.8, 118.04, 118.0, 35.6, 35.2, 29.7, 29.6; FT-IR (thin film, neat): 2955, 1614, 1567, 1473, 1234, 918, 742  $\text{cm}^{-1}$ ; HRMS (ESI):  $m/z$  calcd for  $\text{C}_{27}\text{H}_{30}\text{ClO}_2$   $[\text{M}+\text{H}]^+$  : 421.1934; found : 421.1947.

### 3. Characterization of 3b to 3j:

#### 2,6-di-*tert*-butyl-4-(2-((2-ethylphenyl)thio)benzylidene)cyclohexa-2,5-dien-1-one (3b):

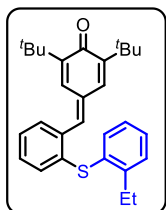

Yellow solid (0.15 g, 33% yield); m. p. = 143–145 °C;  $R_f$  = 0.5 (5% EtOAc in hexane);  $^1\text{H}$  NMR (400 MHz,  $\text{CDCl}_3$ )  $\delta$  7.45 (s, 1H), 7.40 – 7.37 (m, 1H), 7.34 – 7.335 (m, 1H), 7.32 – 7.30 (m, 2H), 7.29 – 7.23 (m, 3H), 7.17 – 7.13 (m, 1H), 7.08 – 7.05 (m, 2H), 2.82 (q,  $J$  = 7.6 Hz, 2H), 1.36 (s, 9H), 1.30 (s, 9H), 1.24 (t,  $J$  = 7.6 Hz, 3H);  $^{13}\text{C}\{^1\text{H}\}$  NMR (100 MHz,  $\text{CDCl}_3$ )  $\delta$  186.6, 149.2, 147.9, 146.3, 140.1, 138.6, 135.3, 134.8, 134.2, 132.5, 132.2, 131.6, 130.0, 129.6, 129.3, 128.8, 128.2, 127.1, 126.1, 35.5, 35.1, 27.3, 15.15, 15.14; FT-IR (thin film, neat): 2954, 1613, 1563, 1359, 1254, 746  $\text{cm}^{-1}$ ; HRMS (ESI):  $m/z$  calcd for  $\text{C}_{29}\text{H}_{35}\text{OS}$   $[\text{M}+\text{H}]^+$ : 431.2409; found : 431.2406.

#### 2,6-di-*tert*-butyl-4-(2((4-methoxyphenyl)thio)benzylidene)cyclohexa-2,5-dien-1-one (3c):

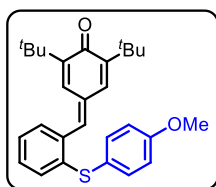

Yellow solid (2.00 g, 80% yield); m. p. = 165–167 °C;  $R_f$  = 0.3 (5% EtOAc in hexane);  $^1\text{H}$  NMR (400 MHz,  $\text{CDCl}_3$ )  $\delta$  7.43 (s, 1H), 7.42 – 7.38 (m, 2H), 7.34 – 7.30 (m, 2H), 7.25 – 7.20 (m, 2H), 7.07 (d,  $J$  = 2.2 Hz, 1H), 7.05 – 7.01 (m, 1H), 6.92 – 6.88 (m, 2H), 3.81 (s, 3H), 1.34 (s, 9H), 1.27 (s, 9H);  $^{13}\text{C}\{^1\text{H}\}$  NMR (100 MHz,  $\text{CDCl}_3$ )  $\delta$  186.7, 160.3, 149.3, 147.9, 140.3, 140.0, 135.9, 134.9, 134.2, 132.6, 131.5, 129.5, 128.6, 128.3, 125.6, 123.3, 115.3, 55.5, 55.48, 35.5, 35.2, 29.6; FT-IR (thin film, neat): 2955, 1614, 1493, 1250, 1059, 742  $\text{cm}^{-1}$ ; HRMS (ESI):  $m/z$  calcd for  $\text{C}_{28}\text{H}_{33}\text{O}_2\text{S}$   $[\text{M}+\text{H}]^+$  : 433.2201; found : 433.2214.

**2,6-di-*tert*-butyl-4-(2-((4-chlorophenyl)thio)benzylidene)cyclohexa-2,5-dien-1-one (3d):**

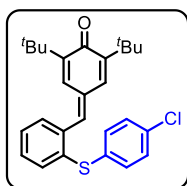

Yellow solid (0.20 g, 45% yield); m. p. = 122–124 °C;  $R_f$  = 0.5 (5% EtOAc in hexane);  $^1\text{H}$  NMR (400 MHz,  $\text{CDCl}_3$ )  $\delta$  7.40 – 7.34 (m, 3H), 7.33 – 7.29 (m, 2H), 7.27 – 7.21 (m, 5H), 6.99 (s, 1H), 1.32 (s, 9H), 1.26 (s, 9H);  $^{13}\text{C}\{^1\text{H}\}$  NMR (100 MHz,  $\text{CDCl}_3$ )  $\delta$  186.6, 149.5, 148.2, 139.9, 136.7, 136.69, 134.7, 133.8, 133.6, 132.8, 132.7, 132.0, 131.9, 129.8, 129.7, 128.0, 127.4, 35.5, 35.2, 29.7; FT-IR (thin film, neat): 2955, 1615, 1475, 1360, 1091, 753  $\text{cm}^{-1}$ ; HRMS (ESI):  $m/z$  calcd for  $\text{C}_{30}\text{H}_{31}\text{Br}_2\text{O}_3$   $[\text{M}+\text{H}]^+$  : 437.1706; found : 437.1705.

**4-(2-((4-bromophenyl)thio)benzylidene)-2,6-di-*tert*-butylcyclohexa-2,5-dien-1-one (3e):**

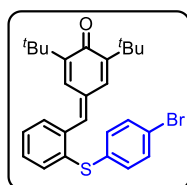

Yellow solid (1.00 g, 41% yield); m. p. = 125–127 °C;  $R_f$  = 0.5 (5% EtOAc in hexane);  $^1\text{H}$  NMR (400 MHz,  $\text{CDCl}_3$ )  $\delta$  7.40 – 7.38 (m, 3H), 7.37 – 7.32 (m, 4H), 7.23 (d,  $J$  = 2.2 Hz, 1H), 7.15 (d,  $J$  = 8.4 Hz, 2H), 6.98 (d,  $J$  = 2.2 Hz, 1H), 1.32 (s, 9H), 1.26 (s, 9H);  $^{13}\text{C}\{^1\text{H}\}$  NMR (100 MHz,  $\text{CDCl}_3$ )  $\delta$  186.6, 149.5, 148.1, 139.9, 136.8, 136.4, 134.7, 134.4, 132.7 (2C), 132.6, 132.2, 131.9, 129.8, 127.9, 127.5, 121.6, 35.5, 35.2, 29.6; FT-IR (thin film, neat): 2955, 1613, 1468, 1359, 1254, 753  $\text{cm}^{-1}$ ; HRMS (ESI):  $m/z$  calcd for  $\text{C}_{27}\text{H}_{30}\text{BrOS}$   $[\text{M}+\text{H}]^+$  : 481.1201; found : 481.1229.

**2,6-di-*tert*-butyl-(2((2,5-dichlorophenyl)thio)benzylidene)cyclohexa-2,5-dien-1-one (3f):**

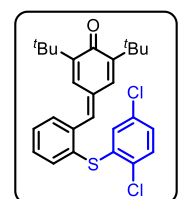

Yellow solid (0.15 g, 25% yield); m. p. = 121–122 °C;  $R_f$  = 0.5 (5% EtOAc in hexane);  $^1\text{H}$  NMR (400 MHz,  $\text{CDCl}_3$ ) 7.55 – 7.53 (m, 1H), 7.51 – 7.47 (m, 1H), 7.45 – 7.39 (m, 2H), 7.31 (s, 1H), 7.21 (d,  $J$  = 8.5 Hz, 1H), 7.18 (d,  $J$  = 2.0 Hz, 1H), 7.09 (dd,  $J$  = 8.5 2.4 Hz, 1H), 6.95 (d,  $J$  = 2.2 Hz, 1H), 6.76 (d,  $J$  = 2.4 Hz, 1H), 1.30 (s, 9H), 1.25 (s, 9H);  $^{13}\text{C}\{^1\text{H}\}$  NMR (100 MHz,  $\text{CDCl}_3$ )  $\delta$  186.5, 149.6, 148.1, 139.7, 139.0, 137.7, 135.0, 134.4, 133.2, 132.9, 132.89, 132.8, 132.3, 131.6, 130.6, 130.1, 129.4, 129.2, 127.5, 35.5, 35.1, 29.6, 29.5; FT-IR (thin film, neat): 2921, 1616, 1458, 1360, 1091, 744  $\text{cm}^{-1}$ ; HRMS (ESI):  $m/z$  calcd for  $\text{C}_{30}\text{H}_{31}\text{Cl}_2\text{O}_3$   $[\text{M}-\text{H}]^-$  : 469.1160; found : 469.1173.

**2,6-di-*tert*-butyl-4-(4-chloro-2-(phenylthio)benzylidene)cyclohexa-2,5-dien-1-one (3g):**

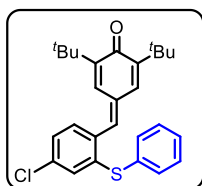

Yellow solid (0.25 g, 28% yield); m. p. = 110–112 °C;  $R_f$  = 0.4 (5% EtOAc in hexane);  $^1\text{H}$  NMR (400 MHz,  $\text{CDCl}_3$ )  $\delta$  7.42 – 7.34 (m, 5H), 7.32 (s, 1H), 7.30 – 7.26 (m, 2H), 7.24 – 7.22 (m, 1H), 7.12 (d,  $J$  = 1.8 Hz, 1H) 7.04 (d,  $J$  = 2.2 Hz, 1H), 1.33 (s, 9H), 1.27 (s, 9H);  $^{13}\text{C}\{^1\text{H}\}$  NMR (100 MHz,  $\text{CDCl}_3$ )  $\delta$  186.6, 149.7, 148.2, 140.4, 138.4, 135.6, 134.6, 133.7, 133.04, 133.0, 132.8, 132.5, 129.9, 129.7, 128.7, 127.7, 126.7, 35.6, 35.2, 29.6; FT-IR (thin film, neat): 2954, 1613, 1477, 1359, 1254, 739  $\text{cm}^{-1}$ ; HRMS (ESI):  $m/z$  calcd for  $\text{C}_{27}\text{H}_{30}\text{ClOS}$   $[\text{M}+\text{H}]^+$  : 437.1706; found : 437.1725.

**4-(4-bromo-2-(phenylthio)benzylidene)-2,6-di-*tert*-butylcyclohexa-2,5-dien-1-one (3h):**

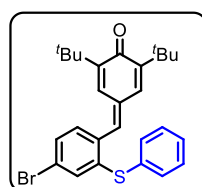

yellow solid (0.19 g 28% yield); m. p. = 108–110 °C;  $R_f$  = 0.4 (5% EtOAc in hexane);  $^1\text{H}$  NMR (400 MHz,  $\text{CDCl}_3$ )  $\delta$  7.46 – 7.33 (m, 6H), 7.32 – 7.29 (m, 2H), 7.26 – 7.21 (m, 2H), 7.01 (d,  $J$  = 1.8 Hz, 1H), 1.32 (s, 9H), 1.27 (s, 9H);  $^{13}\text{C}\{^1\text{H}\}$  NMR (100 MHz,  $\text{CDCl}_3$ )  $\delta$  186.6, 149.7, 148.3, 140.4, 138.5, 134.6, 134.3, 134.2, 133.0, 132.9, 132.8, 132.7, 129.9, 129.7, 128.6, 127.7, 123.8, 35.6, 35.2, 29.64, 29.6; FT-IR (thin film, neat): 2921, 1740, 1617, 1458, 1375, 740  $\text{cm}^{-1}$ ; HRMS (ESI):  $m/z$  calcd for  $\text{C}_{27}\text{H}_{30}\text{BrOS}$   $[\text{M}+\text{H}]^+$  : 481.1201; found : 481.1213.

**2,6-di-*tert*-butyl-4-(4-methoxy-2-(phenylthio)benzylidene)cyclohexa-2,5-dien-1-one (3i):**

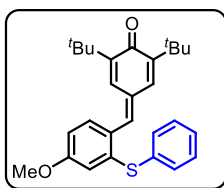

Yellow solid (0.30 g, 34% yield); m. p. = 171–173 °C;  $R_f$  = 0.3 (5% EtOAc in hexane);  $^1\text{H}$  NMR (400 MHz,  $\text{CDCl}_3$ )  $\delta$  7.41 (s, 1H), 7.39 – 7.26 (m, 7H), 7.02 (d,  $J$  = 2.2 Hz, 1H) 6.86 (dd,  $J$  = 8.6, 2.5 Hz, 1H), 6.75 (d,  $J$  = 2.5 Hz, 1H) 3.74 (s, 3H), 1.33 (s, 9H), 1.28 (s, 9H);  $^{13}\text{C}\{^1\text{H}\}$  NMR (100 MHz,  $\text{CDCl}_3$ )  $\delta$  186.7, 160.7, 149.0, 147.5, 140.1, 139.7, 135.1, 134.0, 133.1, 132.3, 131.7, 129.6, 128.6, 128.3, 128.1, 116.4, 112.7, 55.53, 55.5, 35.5, 35.1, 29.7, 29.6; FT-IR (thin film, neat): 2954, 1610, 1589, 1359, 1252, 743  $\text{cm}^{-1}$ ; HRMS (ESI):  $m/z$  calcd for  $\text{C}_{28}\text{H}_{33}\text{O}_2\text{S}$   $[\text{M}+\text{H}]^+$  : 433.2201; found : 433.2208.

**2,6-di-*tert*-butyl-4-(2-(naphthalen-2-ylthio)benzylidene)cyclohexa-2,5-dien-1-one (3j):**

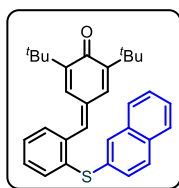

Yellow solid (0.27 g, 32% yield); m. p. = 132–133 °C;  $R_f$  = 0.4 (5% EtOAc in hexane);  $^1\text{H}$  NMR (400 MHz,  $\text{CDCl}_3$ )  $\delta$  7.82 (d,  $J$  = 1.2 Hz, 1H), 7.80 – 7.78 (m, 1H), 7.76 (d,  $J$  = 8.6 Hz, 1H), 7.73 – 7.71 (m, 1H), 7.50 – 7.45 (m, 2H), 7.44 (s, 1H), 7.41 – 7.35 (m, 3H), 7.33 – 7.28 (m, 2H), 7.27 – 7.26 (m, 1H), 6.98 (d,  $J$  = 2.3 Hz, 1H), 1.29 (s, 9H), 1.26 (s, 9H);  $^{13}\text{C}\{^1\text{H}\}$  NMR (100 MHz,  $\text{CDCl}_3$ )  $\delta$  186.7, 149.4, 148.0, 140.2, 137.4, 136.5, 134.6, 133.9, 132.6, 132.5, 132.0, 131.8 (2C), 130.8, 129.7, 129.3, 129.0, 128.1, 127.9, 127.5, 127.1, 126.9, 126.7, 35.5, 35.1, 29.64, 29.60; FT-IR (thin film, neat): 2921, 1740, 1617, 1459, 1376, 743  $\text{cm}^{-1}$ ; HRMS (ESI):  $m/z$  calcd for  $\text{C}_{31}\text{H}_{33}\text{OS}$   $[\text{M}+\text{H}]^+$  : 453.2252; found : 453.2259.

**4. Characterization of 5b to 5e**

**2,6-di-*tert*-butyl-4-(2-(3-methyl-1H-indol-1-yl)benzylidene)cyclohexa-2,5-dien-1-one**

**(5b):** Yellow solid (0.30 g, 52% yield); m. p. = 179–181 °C;  $R_f$  = 0.5 (5% EtOAc in hexane);

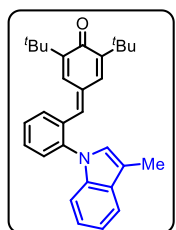

$^1\text{H}$  NMR (400 MHz,  $\text{CDCl}_3$ )  $\delta$  7.68 – 7.65 (m, 1H), 7.63 – 7.62 (m, 1H), 7.57 (d,  $J$  = 2.1 Hz, 1H), 7.55 – 7.47 (m, 3H), 7.21 – 7.20 (m, 3H), 6.98 (s, 1H), 6.80 – 6.79 (m, 2H), 2.40 (s, 3H), 1.35 (s, 9H), 1.27 (s, 9H);  $^{13}\text{C}\{^1\text{H}\}$  NMR (100 MHz,  $\text{CDCl}_3$ )  $\delta$  186.7, 149.8, 147.9, 139.7, 138.7, 137.4, 134.9, 132.8, 132.68, 132.66, 130.1, 129.5, 127.8, 127.5, 127.4, 127.3, 122.7, 120.1, 119.2, 113.1, 110.7, 35.7, 35.2, 29.7, 29.6, 9.79, 9.76; FT-IR (thin film, neat): 2922, 1738, 1616, 1458, 1360, 741  $\text{cm}^{-1}$ ; HRMS (ESI):  $m/z$  calcd for  $\text{C}_{30}\text{H}_{34}\text{NO}$   $[\text{M}+\text{H}]^+$  : 424.2640; found : 424.2620.

**2,6-di-*tert*-butyl-4-(2-(5-chloro-1H-indol-1-yl)benzylidene)cyclohexa-2,5-dien-1-one (5c):**

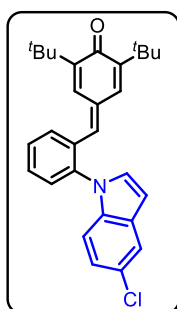

Yellow solid (0.066 g, 41.3% yield); m. p. = 132–134 °C;  $R_f$  = 0.4 (5% EtOAc in hexane);  $^1\text{H}$  NMR (400 MHz,  $\text{DMSO}-d_6$ )  $\delta$  7.84 (d,  $J$  = 1.6 Hz, 1H), 7.69 – 7.62 (m, 3H), 7.61 – 7.57 (m, 1H), 7.49 (d,  $J$  = 3.2 Hz, 1H), 7.37 (d,  $J$  = 1.2 Hz, 1H), 7.24 (dd,  $J$  = 8.7, 1.7 Hz, 1H), 7.11 – 7.09 (m, 1H), 6.95 (brs, 2H),

6.67 (d,  $J = 3.2$  Hz, 1H), 1.20 (s, 9H), 1.17 (s, 9H);  $^{13}\text{C}\{^1\text{H}\}$  NMR (100 MHz, DMSO- $d_6$ )  $\delta$  185.9, 148.2, 146.7, 139.6, 137.9, 135.2, 134.8, 132.5, 132.2, 132.1, 131.8, 130.6, 130.4, 128.2, 127.8, 127.7, 124.8, 123.1, 112.8, 112.4, 103.0, 35.0, 34.7, 29.24, 29.2; FT-IR (thin film, neat FT-IR (thin film, neat): 2925, 1740, 1607, 1459, 1362, 750  $\text{cm}^{-1}$ ; HRMS (ESI):  $m/z$  calcd for  $\text{C}_{29}\text{H}_{31}\text{ClNO}$   $[\text{M}+\text{H}]^+$  : 444.2094; found : 444.2079.

#### 4-(2-(5-bromo-1H-indol-1-yl)benzylidene)-2,6-di-*tert*-butylcyclohexa-2,5-dien-1-one

(5d): Yellow solid (0.134 g, 47% yield); m. p. = 134–136 °C;  $R_f = 0.4$  (5% EtOAc in hexane);

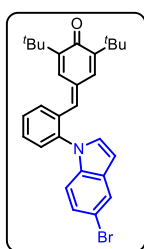

$^1\text{H}$  NMR (400 M DMSO- $d_6$ )  $\delta$  7.68 – 7.62 (m, 4H), 7.60 – 7.58 (m, 1H), 7.48 (d,  $J = 3.2$  Hz, 1H), 7.34 (d,  $J = 1.8$  Hz, 1H), 7.12 – 7.09 (m, 1H), 7.08 (s, 1H), 6.96 (s, 1H), 6.94 (d,  $J = 2.0$  Hz, 1H), 7.34 (dd,  $J = 3.2, 0.6$  Hz, 1H), 1.19 (s, 9H), 1.16 (s, 9H);  $^{13}\text{C}\{^1\text{H}\}$  NMR (100 MHz, DMSO- $d_6$ )  $\delta$  185.9, 148.4, 146.8, 139.8, 137.7,

136.7, 134.7, 132.4, 132.3, 132.2, 131.3, 130.7, 128.3, 127.72, 127.7, 127.3, 127.1, 122.3, 120.6, 110.2, 103.6, 35.0, 34.7, 29.2, 29.1; FT-IR (thin film, neat FT-IR (thin film, neat): 2955, 1615 1483, 1458, 1360, 742  $\text{cm}^{-1}$ ; HRMS (ESI):  $m/z$  calcd for  $\text{C}_{29}\text{H}_{31}\text{BrNO}$   $[\text{M}+\text{H}]^+$  : 488.1589; found : 488.1617.

#### 2,6-di-*tert*-butyl-4-(2-(5-methoxy-1H-indol-1-yl)benzylidene)cyclohexa-2,5-dien-1-one

(5e): Yellow solid (0.15 g, 55.9% yield); m. p. = 143–145 °C;  $R_f = 0.3$  (5% EtOAc in hexane);

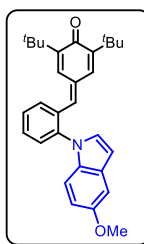

$^1\text{H}$  NMR (400 MHz,  $\text{CDCl}_3$ )  $\delta$  7.62 (d,  $J = 7.1$  Hz, 1H), 7.54 – 7.52 (m, 3H), 7.51 – 7.48 (m, 1H), 7.17 – 7.15 (m, 3H), 6.87 (dd,  $J = 9.0, 2.4$  Hz, 1H), 6.79 (d,  $J = 2.2$  Hz, 1H), 6.73 (s, 1H), 6.63 (d,  $J = 3.1$  Hz, 1H), 3.89 (s, 3H), 1.33 (s, 9H), 1.27 (s, 9H);  $^{13}\text{C}\{^1\text{H}\}$  NMR (100 MHz,  $\text{CDCl}_3$ )  $\delta$  186.7, 154.9, 149.8, 148.0,

139.5, 138.5, 134.8, 132.9, 132.7, 132.6, 132.3, 130.6, 130.1, 129.5, 127.7, 127.6, 127.4, 112.9, 111.6, 103.5, 102.7, 56.0, 55.98, 35.6, 35.2, 29.7, 29.6; FT-IR (thin film, neat FT-IR (thin film, neat): 2954, 1614, 1578, 1483, 1256, 740  $\text{cm}^{-1}$ ; HRMS (ESI):  $m/z$  calcd for  $\text{C}_{30}\text{H}_{34}\text{NO}_2$   $[\text{M}+\text{H}]^+$  : 440.2590; found : 440.2575.

## 5. Characterization of products 2b to 2u

**2,6-di-*tert*-butyl-4-(3-methyl-9H-xanthen-9-yl)phenol (2b):** The reaction was performed at

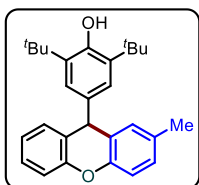

0.125 mmol scale of **1b**; pale yellow solid (48.5 mg, 97% yield);  $R_f = 0.4$  (5% EtOAc in hexane);  $^1\text{H NMR}$  (400 MHz,  $\text{CDCl}_3$ )  $\delta$  7.22 – 7.18 (m, 1H), 7.15 – 7.12 (m, 2H), 7.06 – 7.04 (m, 1H), 7.02 – 7.00 (m, 2H), 6.97 – 6.95 (m, 3H), 5.11 (s, 1H), 5.07 (s, 1H), 2.27 (s, 3H), 1.38 (s, 18H);  $^{13}\text{C}$   $\{^1\text{H}\}$  NMR (100 MHz,  $\text{CDCl}_3$ )  $\delta$  152.5, 151.8, 149.6, 137.3, 135.9, 132.5, 129.9, 129.6, 128.4, 127.6, 125.7, 125.1, 124.7, 123.1, 116.5, 116.2, 44.8, 44.77, 34.4, 30.4, 21.91, 21.9; FT-IR (thin film, neat): 2956, 1599, 1480, 1454, 1313, 751  $\text{cm}^{-1}$ ; HRMS (ESI):  $m/z$  calcd for  $\text{C}_{28}\text{H}_{31}\text{O}_2$   $[\text{M}-\text{H}]^-$  : 399.2324 found : 399.2339.

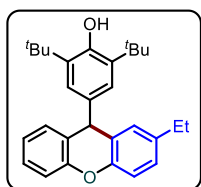

**2,6-di-*tert*-butyl-4-(3-ethyl-9H-xanthen-9-yl)phenol (2c):** The reaction was performed at 0.121 mmol scale of **1c**; pale yellow solid (48.0 mg, 96% yield);  $R_f = 0.4$  (5% EtOAc in hexane);  $^1\text{H NMR}$  (400 MHz,  $\text{CDCl}_3$ )  $\delta$  7.21 – 7.17 (m, 1H), 7.14 – 7.10 (m, 2H), 7.06 – 7.03 (m, 2H), 7.01 – 6.99 (m, 1H), 6.97 – 6.96 (m, 1H), 6.94 (s, 2H), 5.19 (s, 1H), 5.05 (s, 1H), 2.56 (q,  $J = 7.6$  Hz, 2H), 1.36 (s, 18H), 1.17 (t,  $J = 7.6$  Hz, 3H);  $^{13}\text{C}$   $\{^1\text{H}\}$  NMR (100 MHz,  $\text{CDCl}_3$ )  $\delta$  152.4, 151.9, 149.8, 139.1, 136.9, 135.8, 129.6, 128.7, 127.6, 127.2, 125.7, 125.3, 124.8, 123.1, 116.5, 116.3, 44.7, 34.4, 30.4, 28.3, 16.0; FT-IR (thin film, neat): 2958, 1630, 1478, 1456, 1235, 754  $\text{cm}^{-1}$ ; HRMS (ESI):  $m/z$  calcd for  $\text{C}_{29}\text{H}_{33}\text{O}_2$   $[\text{M}-\text{H}]^-$  : 413.2481; found : 413.2487.

**2,6-di-*tert*-butyl-4-(3-(*tert*-butyl)-9H-xanthen-9-yl)phenol (2d):** The reaction was

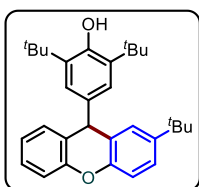

performed at 0.110 mmol scale of **1d**; yellow gummy solid (42.0 mg, 84% yield);  $R_f = 0.4$  (5% EtOAc in hexane);  $^1\text{H NMR}$  (400 MHz,  $\text{CDCl}_3$ )  $\delta$  7.26 – 7.18 (m, 4H), 7.14 – 7.12 (m, 1H), 7.08 – 7.06 (m, 1H), 7.04 – 7.00 (m, 1H), 6.94 (s, 2H), 5.18 (s, 1H), 5.06 (s, 1H), 1.37 (s, 18H), 1.28 (s, 9H);  $^{13}\text{C}$   $\{^1\text{H}\}$  NMR (100 MHz,  $\text{CDCl}_3$ )  $\delta$  152.4, 152.2, 149.7, 145.9, 136.3, 135.8, 129.6, 127.7, 126.2, 125.6, 125.0,



124.9, 124.7, 123.1, 116.5, 115.9, 44.63, 44.6, 34.6, 34.44, 34.4, 31.6, 30.4; FT-IR (thin film, neat): 2958, 1598, 1481, 1433, 1251, 753  $\text{cm}^{-1}$ ; HRMS (ESI):  $m/z$  calcd for  $\text{C}_{31}\text{H}_{37}\text{O}_2$   $[\text{M}-\text{H}]^-$  : 441.2794; found : 441.2803.

**2,6-di-*tert*-butyl-4-(2,4-dimethyl-9H-xanthen-9-yl)phenol (2e):** The reaction was performed

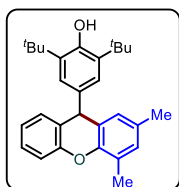

at 0.096 mmol scale of **1e**; white solid (41.0 mg, 80% yield);  $R_f = 0.4$  (5% EtOAc in hexane);  $^1\text{H}$  NMR (400 MHz,  $\text{CDCl}_3$ )  $\delta$  7.22 – 7.16 (m, 1H), 7.13 – 7.11 (m, 2H), 7.01 – 6.99 (m, 1H), 6.97 (s, 2H), 6.94 (s, 1H), 6.89 (s, 1H), 5.10 (s, 1H), 5.06 (s, 1H), 2.25 (s, 3H), 2.18 (s, 3H), 1.39 (s, 18H);  $^{13}\text{C}$   $\{^1\text{H}\}$  NMR (100 MHz,  $\text{CDCl}_3$ )  $\delta$  152.4, 151.8, 149.5, 137.5, 136.1, 135.8, 131.3, 130.2, 129.7, 127.5, 125.8, 124.8, 123.0, 122.5, 117.3, 116.5, 44.4, 44.39, 34.4, 30.4, 19.74, 19.7, 19.2; FT-IR (thin film, neat): 2957, 1482, 1403, 1232, 753  $\text{cm}^{-1}$ ; HRMS (APCI):  $m/z$  calcd for  $\text{C}_{29}\text{H}_{33}\text{O}_2$   $[\text{M}-\text{H}]^-$  : 413.2481; found : 413.2494.

**2,6-di-*tert*-butyl-4-(2-ethoxy-9H-xanthen-9-yl)phenol (2f):** The reaction was performed at

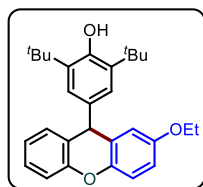

0.116 mmol scale of **1f**; white solid (49.1 mg, 98% yield);  $R_f = 0.3$  (5% EtOAc in hexane);  $^1\text{H}$  NMR (400 MHz,  $\text{CDCl}_3$ )  $\delta$  7.19 (t,  $J = 7.6$  Hz, 1H), 7.10 (d,  $J = 7.9$  Hz, 2H), 7.05 (d,  $J = 8.8$  Hz, 1H), 7.00 – 6.96 (m, 1H), 6.95 (s, 2H), 6.76 (dd,  $J = 8.8, 2.8$  Hz, 1H), 6.64 (d,  $J = 2.6$  Hz, 1H), 5.10 (s, 1H), 5.05 (s, 1H), 3.95 (q,  $J = 7.0$  Hz, 2H), 1.37 (s, 21H);  $^{13}\text{C}$   $\{^1\text{H}\}$  NMR (100 MHz,  $\text{CDCl}_3$ )  $\delta$  154.7, 152.5, 151.9, 145.8, 136.8, 136.0, 129.6, 127.6, 126.3, 125.2, 124.8, 123.0, 117.1, 116.4, 114.9, 114.1, 64.0, 45.1, 45.0, 34.4, 30.4, 15.0; FT-IR (thin film, neat): 2959, 1478, 1434, 1252, 1223, 750  $\text{cm}^{-1}$ ; HRMS (ESI):  $m/z$  calcd for  $\text{C}_{29}\text{H}_{33}\text{O}_3$   $[\text{M}-\text{H}]^-$  : 429.2430; found : 429.2441.

**2,6-di-*tert*-butyl-4-(3-methoxy-9H-xanthen-9-yl)phenol (2g):** The reaction was performed at

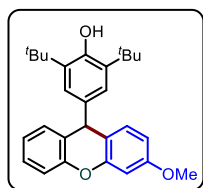

0.120 mmol scale of **1g**; yellow gummy solid (36.5 mg, 71% yield);  $R_f = 0.3$  (5% EtOAc in hexane);  $^1\text{H}$  NMR (400 MHz,  $\text{CDCl}_3$ )  $\delta$  7.22 – 7.18 (m, 1H), 7.12 – 7.10 (m, 2H), 7.07 (d,  $J = 8.9$  Hz, 1H), 7.01 – 6.97 (m, 1H), 6.95 (s,

2H), 6.78 (dd,  $J = 8.9, 3.0$  Hz, 1H), 6.65 (d,  $J = 2.9$  Hz, 1H), 5.11 (s, 1H), 5.06 (s, 1H), 3.74 (s, 3H), 1.37 (s, 18H);  $^{13}\text{C}$   $\{^1\text{H}\}$  NMR (100 MHz,  $\text{CDCl}_3$ )  $\delta$  155.4, 152.5, 151.9, 145.8, 136.7, 135.9, 129.6, 127.7, 126.4, 125.1, 124.8, 123.0, 117.2, 116.4, 114.1, 113.4, 55.8, 55.7, 45.1, 34.4, 30.4; FT-IR (thin film, neat): 2959, 1624, 1481, 1433, 1238, 753  $\text{cm}^{-1}$ ; HRMS (ESI):  $m/z$  calcd for  $\text{C}_{28}\text{H}_{31}\text{O}_3$   $[\text{M}-\text{H}]^-$  : 415.2273; found : 415.2294.

**2,6-di-*tert*-butyl-4-(1,3-dimethoxy-9H-xanthen-9-yl)phenol (2h):** The reaction was

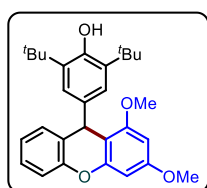

performed at 0.112 mmol scale of **1h**; white solid (48.0 mg, 96% yield);  $R_f = 0.2$  (5% EtOAc in hexane);  $^1\text{H}$  NMR (400 MHz,  $\text{CDCl}_3$ )  $\delta$  7.26 – 7.23 (m, 1H), 7.21 – 7.19 (m, 1H), 7.16 – 7.14 (m, 1H), 7.05 (dd,  $J = 7.4, 1.2$  Hz,

1H), 7.02 (s, 2H), 6.37 (d,  $J = 2.4$  Hz, 1H), 6.21 (d,  $J = 2.3$  Hz, 1H), 5.32 (s, 1H), 4.99 (s, 1H), 3.82 (s, 3H), 3.80 (s, 3H), 1.37 (s, 18H);  $^{13}\text{C}$   $\{^1\text{H}\}$  NMR (100 MHz,  $\text{CDCl}_3$ )  $\delta$  159.7, 157.9, 153.3, 152.2, 152.0, 137.3, 135.3, 129.7, 127.4, 126.4, 124.3, 123.5, 116.3, 108.1, 94.1, 93.4, 55.70, 55.68, 55.54, 55.52, 38.95, 38.9, 34.4, 30.4; FT-IR (thin film, neat): 2956, 1603, 1454, 1229, 1143, 756  $\text{cm}^{-1}$ ; HRMS (ESI):  $m/z$  calcd for  $\text{C}_{29}\text{H}_{33}\text{O}_4$   $[\text{M}-\text{H}]^-$  : 445.2379; found : 445.2382.

**2,6-di-*tert*-butyl-4-(4-methoxy-2-methyl-9H-xanthen-9-yl)phenol (2i):** The reaction was

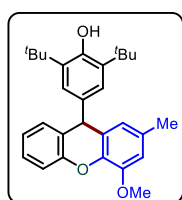

performed at 0.104 mmol scale of **1i**; white solid (38.0 mg, 76% yield);  $R_f = 0.3$  (5% EtOAc in hexane);  $^1\text{H}$  NMR (400 MHz,  $\text{CDCl}_3$ )  $\delta$  7.27 – 7.25 (m, 1H), 7.22 – 7.18 (m, 1H), 7.13 – 7.11 (m, 1H), 7.02 – 6.98 (m, 1H), 6.96 (s,

2H), 6.63 – 6.57 (m, 2H), 5.10 (s, 1H), 5.06 (s, 1H), 3.95 (s, 3H), 2.27 (s, 3H), 1.37 (s, 18H);  $^{13}\text{C}$   $\{^1\text{H}\}$  NMR (100 MHz,  $\text{CDCl}_3$ )  $\delta$  152.4, 151.5, 147.7, 139.0, 137.2, 135.8, 132.4, 129.6, 127.6, 126.0, 125.3, 124.7, 123.3, 121.4, 116.8, 111.0, 56.3, 44.7, 34.4, 30.4, 21.4; FT-IR (thin film, neat): 2959, 1608, 1481, 1241, 1117, 753  $\text{cm}^{-1}$ ; HRMS (ESI):  $m/z$  calcd for  $\text{C}_{29}\text{H}_{33}\text{O}_3$   $[\text{M}-\text{H}]^-$  : 429.2430; found : 429.2437.

**2,6-di-tert-butyl-4-(2-fluoro-9H-xanthen-9-yl)phenol (2j):** The reaction was performed at

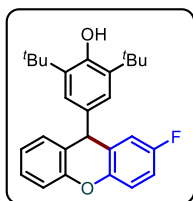

0.099 mmol scale of **1j**; white gummy solid (20 mg, 50% yield);  $R_f = 0.4$  (5% EtOAc in hexane);  $^1\text{H}$  NMR (400 MHz,  $\text{CDCl}_3$ )  $\delta$  7.23 – 7.19 (m, 1H), 7.12 – 7.06 (m, 3H), 7.02 – 6.98 (m, 1H), 6.93 – 6.87 (m, 3H), 6.79 (dd,  $J = 9.0$ ,

3.0 Hz, 1H), 5.10 (s, 1H), 5.09 (s, 1H), 1.37 (s, 18H);  $^{13}\text{C}$   $\{^1\text{H}\}$  NMR (100 MHz,  $\text{CDCl}_3$ )  $\delta$  158.6 (d,  $J_{\text{C-F}} = 238.8$  Hz), 152.7, 151.5, 147.7 (d,  $J_{\text{C-F}} = 1.0$  Hz), 136.3, 136.2, 129.6, 127.9, 127.0 (d,  $J_{\text{C-F}} = 29.3$  Hz), 124.9, 124.6, 123.4, 117.6 (d,  $J_{\text{C-F}} = 8.3$  Hz), 116.5, 115.6 (d,  $J_{\text{C-F}} = 23.1$  Hz), 114.6 (d,  $J_{\text{C-F}} = 23.7$  Hz), 44.8, 34.5, 30.4;  $^{19}\text{F}\{^1\text{H}\}$  NMR (376 MHz,  $\text{CDCl}_3$ )  $\delta$  – 120.6; FT-IR (thin film, neat): 2956, 1567, 1450, 1434, 1264, 753  $\text{cm}^{-1}$ ; HRMS (ESI):  $m/z$  calcd for  $\text{C}_{27}\text{H}_{28}\text{FO}_2$   $[\text{M-H}]^-$ : 403.2073; found: 403.2072.

**2,6-di-tert-butyl-4-(2-chloro-9H-xanthen-9-yl)phenol (2k):** The reaction was performed at

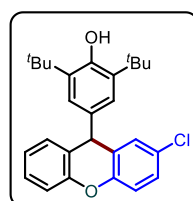

0.107 mmol scale of **1k**; yellow gummy solid (39.5 mg, 79% yield);  $R_f = 0.4$  (5% EtOAc in hexane);  $^1\text{H}$  NMR (400 MHz,  $\text{CDCl}_3$ )  $\delta$  7.23 – 7.12 (m, 3H), 7.10 – 7.05 (m, 3H), 7.03 – 6.98 (m, 1H), 6.92 (s, 2H), 5.10 (s, 1H), 5.09 (s,

1H), 1.37 (s, 18H);  $^{13}\text{C}$   $\{^1\text{H}\}$  NMR (100 MHz,  $\text{CDCl}_3$ )  $\delta$  152.7, 151.2, 150.2, 136.4, 136.1, 129.7, 129.3, 127.9, 127.8, 127.2, 124.9, 124.8, 123.6, 118.9, 117.9, 116.5, 44.6, 34.4, 30.4; FT-IR (thin film, neat): 2956, 1598, 1474, 1434, 1254, 753  $\text{cm}^{-1}$ ; HRMS (ESI):  $m/z$  calcd for  $\text{C}_{27}\text{H}_{28}\text{ClO}_2$   $[\text{M-H}]^-$ : 419.1778; found: 419.1784.

**4-(1-bromo-9H-xanthen-9-yl)-2,6-di-tert-butylphenol (2l):** The reaction was performed at

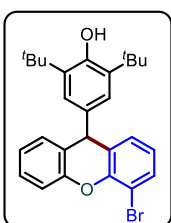

0.115 mmol scale of **1l**; yellow gummy solid (38.0 mg, 76% yield);  $R_f = 0.4$  (5% EtOAc in hexane);  $^1\text{H}$  NMR (400 MHz,  $\text{CDCl}_3$ )  $\delta$  7.40 (dd,  $J = 7.8$ , 1.4 Hz, 1H), 7.23 – 7.19 (m, 2H), 7.06 – 6.99 (m, 3H), 6.88 (s, 2H), 6.82 (t,  $J = 7.8$  Hz, 1H), 5.11 (s, 1H), 5.05 (s, 1H), 1.32 (s, 18H);  $^{13}\text{C}$   $\{^1\text{H}\}$  NMR (100 MHz,

$\text{CDCl}_3$ )  $\delta$  152.7, 152.6, 151.3, 148.4, 136.1, 136.08, 131.4, 129.5, 128.8, 127.9, 127.5, 125.3,

124.9, 123.9, 116.9, 110.7, 44.9, 44.8, 34.4, 30.4; FT-IR (thin film, neat): 2956, 1474, 1434, 1254, 754  $\text{cm}^{-1}$ ; HRMS (ESI):  $m/z$  calcd for  $\text{C}_{27}\text{H}_{28}\text{BrO}_2$   $[\text{M}-\text{H}]^-$ : 463.1273; found: 463.1272.

**2,6-di-tert-butyl-4-(1,3-dichloro-9H-xanthen-9-yl)phenol (2m):** The reaction was

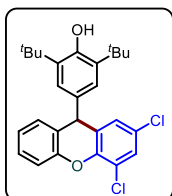

performed at 0.109 mmol scale of **1m**; yellow gummy solid (36.0 mg, 72% yield);  $R_f = 0.4$  (5% EtOAc in hexane);  $^1\text{H}$  NMR (400 MHz,  $\text{CDCl}_3$ )  $\delta$  7.28 (d,  $J = 2.4$  Hz, 1H), 7.25 – 7.23 (m, 2H), 7.08 – 7.02 (m, 2H), 7.00 (dd,  $J = 2.4, 0.6$

Hz, 1H), 6.91 (s, 2H), 5.13 (s, 1H), 5.10 (s, 1H), 1.38 (s, 18H);  $^{13}\text{C}$   $\{^1\text{H}\}$  NMR (100 MHz,  $\text{CDCl}_3$ )  $\delta$  152.9, 150.8, 146.3, 136.3, 135.7, 129.5, 128.6, 128.2, 128.1, 127.9, 127.6, 124.8, 124.5, 124.2, 122.5, 116.9, 44.76, 44.7, 34.5, 30.4; FT-IR (thin film, neat): 2959, 1595, 1449, 1264, 1183, 752  $\text{cm}^{-1}$ ; HRMS (ESI):  $m/z$  calcd for  $\text{C}_{27}\text{H}_{27}\text{ClO}_2$   $[\text{M}-\text{H}]^-$ : 453.1388; found: 453.1393.

**2,6-di-tert-butyl-4-(1,3-dibromo-9H-xanthen-9-yl)phenol (2n):** The reaction was performed

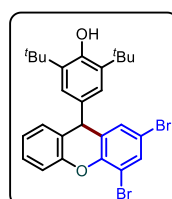

at 0.009 mmol scale of **1n**; yellow gummy solid (37.0 mg, 74% yield);  $R_f = 0.4$  (5% EtOAc in hexane);  $^1\text{H}$  NMR (400 MHz,  $\text{CDCl}_3$ )  $\delta$  7.58 (d,  $J = 2.3$  Hz, 1H), 7.24 – 7.23 (m, 2H), 7.18 (dd,  $J = 2.3, 0.6$  Hz, 1H), 7.08 – 7.02 (m, 2H), 6.90

(s, 2H), 5.13 (s, 1H), 5.10 (s, 1H), 1.37 (s, 18H);  $^{13}\text{C}$   $\{^1\text{H}\}$  NMR (100 MHz,  $\text{CDCl}_3$ )  $\delta$  152.9, 151.0, 147.8, 136.3, 135.6, 133.7, 131.5, 129.5, 129.0, 128.1, 124.8, 124.7, 124.2, 116.9, 115.2, 111.6, 44.83, 44.8, 34.5, 30.4; FT-IR (thin film, neat): 2959, 1558, 1443, 1264, 1158, 753  $\text{cm}^{-1}$ ; HRMS (ESI):  $m/z$  calcd for  $\text{C}_{27}\text{H}_{27}\text{Br}_2\text{O}_2$   $[\text{M}-\text{H}]^-$ : 541.0378; found: 541.0378.

**4-(2-bromo-4-methoxy-9H-xanthen-9-yl)-2,6-di-tert-butylphenol (2o):** The reaction was

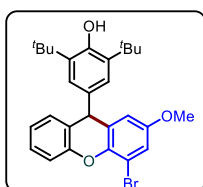

performed at 0.101 mmol scale of **1o**; white solid (37.0 mg, 74% yield);  $R_f = 0.3$  (5% EtOAc in hexane);  $^1\text{H}$  NMR (400 MHz,  $\text{CDCl}_3$ )  $\delta$  7.26 – 7.19 (m, 2H), 7.09 – 7.07 (m, 1H), 7.03 – 6.99 (m, 1H), 6.92 (s, 3H), 6.88 – 6.87 (m,

1H), 5.09 (s, 1H), 5.08 (s, 1H), 3.94 (s, 3H), 1.37 (s, 18H);  $^{13}\text{C}$   $\{^1\text{H}\}$  NMR (100 MHz,  $\text{CDCl}_3$ )  $\delta$  152.7, 150.9, 148.8, 140.3, 136.4, 136.1, 129.6, 127.9 (2C), 124.8, 124.7, 123.9, 123.8, 116.8,

114.8, 113.4, 56.55, 56.5, 44.46, 44.4, 34.4, 30.4; FT-IR (thin film, neat): 2956, 1607, 1481, 1433, 1241, 752  $\text{cm}^{-1}$ ; HRMS (ESI):  $m/z$  calcd for  $\text{C}_{28}\text{H}_{30}\text{BrO}_3$   $[\text{M}-\text{H}]^-$ : 493.1378; found : 493.1385.

**2,6-di-tert-butyl-4-(2-phenyl-9H-xanthen-9-yl)phenol (2p)**: The reaction was performed at

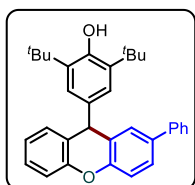

0.108 mmol scale of **1p**; yellow gummy solid (37.5 mg, 75% yield);  $R_f = 0.4$  (5% EtOAc in hexane);  $^1\text{H}$  NMR (400 MHz,  $\text{CDCl}_3$ )  $\delta$  7.53 (d,  $J = 7.6$  Hz, 2H), 7.47 (dd,  $J = 8.4, 2.0$  Hz, 1H), 7.44 – 7.39 (m, 3H), 7.35 – 7.30 (m, 1H),

7.26 – 7.22 (m, 2H), 7.19 – 7.17 (m, 2H), 7.06 (d,  $J = 7.5$  Hz, 1H), 7.02 (s, 2H), 5.24 (s, 1H), 5.09 (s, 1H), 1.40 (s, 18H);  $^{13}\text{C}$  NMR (100 MHz,  $\text{CDCl}_3$ )  $\delta$  152.6, 151.6, 151.3, 140.9, 136.9, 136.3, 136.0, 129.7, 128.8, 128.3, 127.7, 127.0, 126.9, 126.5, 125.8, 125.5, 124.8, 123.4, 116.9, 116.6, 44.8, 44.77, 34.4, 30.4; FT-IR (thin film, neat): 2958, 1601, 1478, 1434, 1235, 754  $\text{cm}^{-1}$ ; HRMS (ESI):  $m/z$  calcd for  $\text{C}_{29}\text{H}_{33}\text{O}_4$   $[\text{M}-\text{H}]^-$  : 461.2481; found : 461.2494.

**4-(12H-benzo[a]xanthen-12-yl)-2,6-di-tert-butylphenol (2q)**: The reaction was performed at

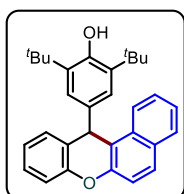

0.110 mmol scale of **1q**; pale yellow solid (48.0 mg, 98% yield);  $R_f = 0.4$  (5% EtOAc in hexane);  $^1\text{H}$  NMR (400 MHz,  $\text{CDCl}_3$ )  $\delta$  8.10 (d,  $J = 8.4$  Hz, 1H), 7.84 (d,  $J = 8.0$  Hz, 1H), 7.80 (d,  $J = 8.9$  Hz, 1H), 7.54 – 7.50 (m, 1H), 7.47 –

7.39 (m, 3H), 7.26 – 7.23 (m, 2H), 7.14 – 7.10 (m, 3H), 5.79 (s, 1H), 5.01 (s, 1H), 1.36 (s, 18H);  $^{13}\text{C}$   $\{^1\text{H}\}$  NMR (100 MHz,  $\text{CDCl}_3$ )  $\delta$  152.3, 151.0, 149.8, 136.9, 135.8, 131.9, 130.9, 129.3, 128.7, 128.6, 127.5, 126.6, 126.2, 124.1, 124.0, 123.8, 123.3, 118.1, 117.3, 116.7, 41.74, 41.7, 34.3, 30.3; FT-IR (thin film, neat): 2959, 1582, 1485, 1433, 1245, 738  $\text{cm}^{-1}$ ; HRMS (ESI):  $m/z$  calcd for  $\text{C}_{31}\text{H}_{31}\text{O}_2$   $[\text{M}-\text{H}]^-$  : 435.2324; found : 435.2332.

**2,6-di-tert-butyl-4-(3-methoxy-12H-benzo[a]xanthen-12-yl)phenol (2r)**: The reaction was

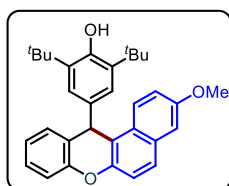

performed at 0.085 mmol scale of **1r**; pale yellow solid (48.0 mg, 96% yield);  $R_f = 0.3$  (5% EtOAc in hexane);  $^1\text{H}$  NMR (400 MHz,  $\text{CDCl}_3$ )  $\delta$  7.97 – 7.94 (m, 1H), 7.66 (d,  $J = 8.0$  Hz, 1H), 7.39 (d,  $J = 8.8$  Hz, 2H),

7.26 – 7.19 (m, 2H), 7.17 – 7.14 (m, 2H), 7.09 – 7.04 (m, 3H), 5.70 (s, 1H), 4.95 (s, 1H), 3.90 (s, 3H), 1.31 (s, 18H);  $^{13}\text{C}$  { $^1\text{H}$ } NMR (100 MHz,  $\text{CDCl}_3$ )  $\delta$  156.4, 152.3, 151.2, 148.4, 136.9, 135.8, 132.0, 129.3, 127.44, 127.4, 127.0, 126.2, 124.8, 123.9, 123.6, 118.8, 118.5, 117.7, 116.6, 107.2, 55.43, 55.4, 41.9, 34.3, 30.3; FT-IR (thin film, neat): 2956, 1611, 1514, 1433, 1247, 752  $\text{cm}^{-1}$ ; HRMS (ESI):  $m/z$  calcd for  $\text{C}_{32}\text{H}_{33}\text{O}_3$  [ $\text{M}-\text{H}$ ] $^-$  : 465.2430; found : 465.2433.

**4-(3-bromo-12H-benzo[*a*]xanthen-12-yl)-2,6-di-*tert*-butylphenol (2s):** The reaction was

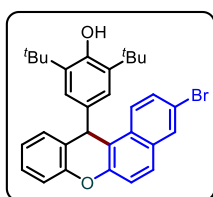

performed at 0.120 mmol scale of **1s**; yellow white solid (42.0 mg, 85% yield);  $R_f = 0.4$  (5% EtOAc in hexane);  $^1\text{H}$  NMR (400 MHz,  $\text{CDCl}_3$ )  $\delta$  7.94 (d,  $J = 2.0$  Hz, 1H), 7.88 (d,  $J = 9.0$  Hz, 1H), 7.66 (d,  $J = 9.0$  Hz, 1H), 7.52

(dd,  $J = 9.0, 2.0$  Hz, 1H), 7.42 (d,  $J = 8.9$  Hz, 1H), 7.38 (d,  $J = 7.4$  Hz, 1H), 7.26 – 7.13 (m, 2H), 7.11 – 7.07 (m, 1H), 7.01 (s, 2H), 5.67 (s, 1H), 4.98 (s, 1H), 1.31 (s, 18H);  $^{13}\text{C}$  { $^1\text{H}$ } NMR (100 MHz,  $\text{CDCl}_3$ )  $\delta$  152.4, 150.7, 149.9, 136.6, 136.0, 132.1, 130.6, 130.5, 129.8, 129.3, 127.8, 127.6, 125.8, 125.1, 124.0, 123.9, 119.3, 117.9, 117.5, 116.7, 41.7, 34.3, 30.3; FT-IR (thin film, neat): 2958, 1627, 1488, 1434, 1249, 753  $\text{cm}^{-1}$ ; HRMS (ESI):  $m/z$  calcd for  $\text{C}_{31}\text{H}_{30}\text{BrO}_2$  [ $\text{M}-\text{H}$ ] $^-$  : 513.1429; found : 513.1427.

**2,6-di-*tert*-butyl-4-(1-methyl-9H-xanthen-9-yl)phenol (2t):** The reaction was performed at

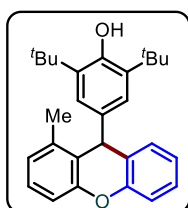

0.124 mmol scale of **1t**; pale yellow solid (48.0 mg, 96% yield); m. p. = 88–90  $^\circ\text{C}$ ;  $R_f = 0.4$  (5% EtOAc in hexane);  $\delta$  7.31 (dd,  $J = 7.6, 1.0$  Hz, 1H), 7.21 – 7.12 (m, 3H), 7.09–7.07 (m, 1H), 7.03 (td,  $J = 7.4, 1.2$  Hz, 1H), 6.99 (s, 2H),

6.91 (d,  $J = 7.3$  Hz, 1H), 5.14 (s, 1H), 5.01 (s, 1H), 2.28 (s, 3H), 1.36 (s, 18H);  $^{13}\text{C}$  { $^1\text{H}$ } NMR (100 MHz,  $\text{CDCl}_3$ )  $\delta$  152.5, 152.3, 151.5, 137.3, 136.2, 135.8, 129.1, 127.5, 127.4, 126.9, 125.1, 124.4, 124.1, 123.3, 116.6, 114.5, 42.83, 42.8, 34.4, 30.4, 19.4; FT-IR (thin film, neat): 2923, 1656, 1462, 1436, 1257, 1155, 749  $\text{cm}^{-1}$ ; HRMS (ESI):  $m/z$  calcd for  $\text{C}_{28}\text{H}_{31}\text{O}_2$  [ $\text{M}-\text{H}$ ] $^-$  : 399.2324; found : 399.2325.

**2,6-di-tert-butyl-4-(3-chloro-9H-xanthen-9-yl)phenol (2u):** The reaction was performed at

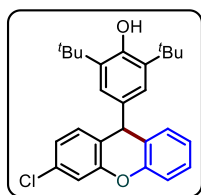

0.118 mmol scale of **1u**; pale yellow solid (46.0 mg, 92 % yield); m. p. = 187–189 °C;  $R_f = 0.4$  (5% EtOAc in hexane);  $^1\text{H NMR}$  (400 MHz,  $\text{CDCl}_3$ )  $\delta$  7.24 – 7.20 (m, 1H), 7.16 – 7.09 (m, 3H), 7.05 – 7.00 (m, 2H), 6.99 – 6.97 (m, 1H), 6.94 (s, 2H), 5.12 (s, 1H), 5.10 (s, 1H), 1.38 (s, 18H);  $^{13}\text{C}\{^1\text{H}\}$  NMR (100 MHz,  $\text{CDCl}_3$ )  $\delta$  152.7, 152.0, 151.1, 136.5, 136.1, 132.7, 130.7, 129.7, 127.9, 125.1, 124.9, 124.2, 123.7, 123.5, 116.8, 116.5, 44.1, 34.4, 30.4; FT-IR (thin film, neat): 2921, 1739, 1457, 1274, 929, 753  $\text{cm}^{-1}$ ; HRMS (ESI):  $m/z$  calcd for  $\text{C}_{27}\text{H}_{28}\text{ClO}_2$   $[\text{M}-\text{H}]^-$ : 419.1778; found : 419.1787.

### 6. Characterization of products 4b to 4j

**2,6-di-tert-butyl-4-(4-ethyl-9H-thioxanthen-9-yl)phenol (4b):** The reaction was performed

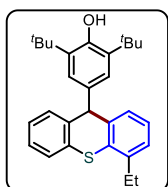

at 0.116 mmol scale of **3b**; yellow gummy solid (32.8 mg, 66% yield);  $R_f = 0.4$  (5% EtOAc in hexane);  $^1\text{H NMR}$  (400 MHz,  $\text{CDCl}_3$ )  $\delta$  7.45 (dd,  $J = 7.4, 1.3$  Hz, 1H), 7.39 (dd,  $J = 7.4, 1.4$  Hz, 1H), 7.26 – 7.17 (m, 4H), 7.14 – 7.12 (m, 1H), 6.89 (s, 2H), 5.23 (s, 1H), 5.03 (s, 1H), 2.87 – 2.81 (m, 2H), 1.32 (s, 18H), 1.28 (t,  $J = 7.5$  Hz, 3H);  $^{13}\text{C}\{^1\text{H}\}$  NMR (100 MHz,  $\text{CDCl}_3$ )  $\delta$  152.4, 141.2, 138.5, 137.8, 135.3, 133.0, 132.2, 131.6, 129.1, 127.3, 127.2, 126.63, 126.6, 126.5, 126.4, 124.9, 53.65, 53.6, 34.4, 30.3, 27.4, 14.7; FT-IR (thin film, neat): 2959, 1588, 1434, 1235, 1120, 739  $\text{cm}^{-1}$ ; HRMS (ESI):  $m/z$  calcd for  $\text{C}_{29}\text{H}_{33}\text{OS}$   $[\text{M}-\text{H}]^-$ : 429.2252; found : 429.2260.

**2,6-di-tert-butyl-4-(2-methoxy-9H-thioxanthen-9-yl)phenol (4c):** The reaction was

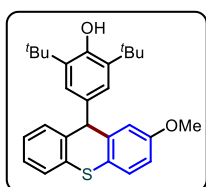

performed at 0.115 mmol scale of **3c**; pale yellow solid (42.0 mg, 84% yield); m. p. = 216–218 °C;  $R_f = 0.3$  (5% EtOAc in hexane);  $^1\text{H NMR}$  (400 MHz,  $\text{CDCl}_3$ )  $\delta$  7.45 – 7.43 (m, 1H), 7.39 – 7.35 (m, 2H), 7.26 – 7.19 (m, 2H), 6.97 (s, 3H), 6.82 (dd,  $J = 8.5, 2.7$  Hz, 1H), 5.18 (s, 1H), 5.09 (s, 1H), 3.81 (s, 3H), 1.36 (s, 18H);  $^{13}\text{C}\{^1\text{H}\}$  NMR (100 MHz,  $\text{CDCl}_3$ )  $\delta$  158.8, 152.5, 139.7, 138.0, 135.5, 133.7, 131.2, 129.3, 127.9, 127.0, 126.7, 126.5, 125.0, 124.2, 115.0, 112.9, 55.6, 55.56, 53.7, 53.65, 34.4,

30.3; FT-IR (thin film, neat): 2957, 1598, 1466, 1434, 1236, 739  $\text{cm}^{-1}$ ; HRMS (ESI):  $m/z$  calcd for  $\text{C}_{28}\text{H}_{31}\text{O}_2\text{S}$   $[\text{M}-\text{H}]^-$ : 431.2045; found : 431.2054.

**2,6-di-*tert*-butyl-4-(2-chloro-9H-thioxanthen-9-yl)phenol (4d)**: The reaction was performed

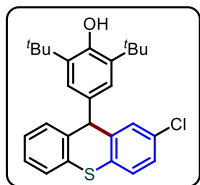

at 0.115 mmol scale of **3d**; white solid (33.0 mg, 66% yield);  $R_f = 0.4$  (5% EtOAc in hexane);  $^1\text{H}$  NMR (400 MHz,  $\text{CDCl}_3$ )  $\delta$  7.43 (dd,  $J = 7.0, 1.4$  Hz, 1H), 7.38 – 7.35 (m, 3H), 7.28 – 7.19 (m, 3H), 6.93 (s, 2H), 5.17 (s, 1H), 5.10 (s, 1H), 1.35 (s, 18H);  $^{13}\text{C}$   $\{^1\text{H}\}$  NMR (100 MHz,  $\text{CDCl}_3$ )  $\delta$  152.7, 139.9, 137.4, 135.7, 132.5, 132.3, 131.7, 131.0, 129.5, 129.4, 128.1, 127.0, 126.94, 126.9, 126.8, 124.8, 53.1, 34.4, 30.3; FT-IR (thin film, neat): 2958, 1740, 1432, 1320, 805, 753  $\text{cm}^{-1}$ ; HRMS (APCI):  $m/z$  calcd for  $\text{C}_{27}\text{H}_{28}\text{ClOS}$   $[\text{M}-\text{H}]^-$ : 435.1549; found : 435.1542.

**4-(2-bromo-9H-thioxanthen-9-yl)-2,6-di-*tert*-butylphenol (4e)**: The reaction was performed

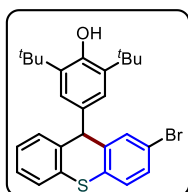

at 0.103 mmol scale of **3e**; pale yellow solid (36.5 mg, 73% yield);  $R_f = 0.4$  (5% EtOAc in hexane);  $^1\text{H}$  NMR (400 MHz,  $\text{CDCl}_3$ )  $\delta$  7.52 (d,  $J = 1.9$  Hz, 1H), 7.42 – 7.39 (m, 1H), 7.35 – 7.26 (m, 3H), 7.25 – 7.18 (m, 2H), 6.91 (s, 2H), 5.15 (s, 1H), 5.08 (s, 1H), 1.34 (s, 18H);  $^{13}\text{C}$   $\{^1\text{H}\}$  NMR (100 MHz,  $\text{CDCl}_3$ )  $\delta$  152.7, 140.1, 137.4, 135.7, 132.4, 132.3, 132.2, 131.0, 129.6, 129.5, 128.3, 127.0, 126.93, 126.9, 124.8, 120.2, 53.0, 52.9, 34.4, 30.3; FT-IR (thin film, neat): 2959, 1462, 1436, 1235, 1156, 751  $\text{cm}^{-1}$ ; HRMS (ESI):  $m/z$  calcd for  $\text{C}_{27}\text{H}_{28}\text{BrOS}$   $[\text{M}-\text{H}]^-$ : 479.1044; found : 479.1054.

**2,6-di-*tert*-butyl-4-(2,5-dichloro-9H-thioxanthen-9-yl)phenol (4f)**: The reaction was

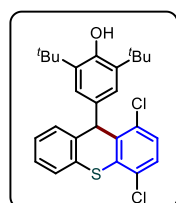

performed at 0.136 mmol scale of **3f**; white solid (34.0 mg, 74% yield); m. p. = 178–180  $^\circ\text{C}$ ;  $R_f = 0.4$  (5% EtOAc in hexane);  $^1\text{H}$  NMR (400 MHz,  $\text{CDCl}_3$ )  $\delta$  7.52 – 7.49 (m, 1H), 7.48 – 7.45 (m, 1H), 7.34 – 7.28 (m, 3H), 7.24 – 7.22 (m, 1H), 6.90 (s, 2H), 5.98 (s, 1H), 5.04 (s, 1H), 1.29 (s, 18H);  $^{13}\text{C}$   $\{^1\text{H}\}$  NMR (100 MHz,  $\text{CDCl}_3$ )  $\delta$  152.7, 139.8, 137.4, 135.7, 132.5, 132.3, 131.7, 131.0, 129.5, 129.4, 128.0, 127.0, 126.93,



126.9, 126.8, 124.8, 53.1, 34.4, 30.3; FT-IR (thin film, neat): 2958, 1592, 1459, 1155, 809, 742  $\text{cm}^{-1}$ ; HRMS (ESI):  $m/z$  calcd for  $\text{C}_{27}\text{H}_{27}\text{Cl}_2\text{OS}$   $[\text{M}-\text{H}]^-$ : 469.1160; found : 469.1183.

**2,6-di-*tert*-butyl-4-(3-chloro-9H-thioxanthen-9-yl)phenol (4g):** The reaction was performed

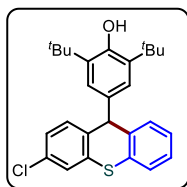

at 0.115 mmol scale of **3g**; yellow gummy solid (29.0 mg, 58% yield); m. p.

= 138–140 °C;  $R_f$  = 0.4 (5% EtOAc in hexane);  $^1\text{H}$  NMR (400 MHz,  $\text{CDCl}_3$ )

$\delta$  7.44 – 7.42 (m, 2H), 7.37 – 7.35 (m, 1H), 7.30 – 7.28 (m, 1H), 7.26 – 7.19

(m, 3H), 6.89 (s, 2H), 5.19 (s, 1H), 5.08 (s, 1H), 1.34 (s, 18H);  $^{13}\text{C}\{^1\text{H}\}$  NMR (100 MHz,

$\text{CDCl}_3$ )  $\delta$  152.6, 137.7, 136.7, 135.6, 135.0, 132.31, 132.3, 131.1, 130.4, 129.5, 127.0, 126.9

(2C), 126.7, 126.6, 124.8, 52.6, 52.59, 34.4, 30.3; FT-IR (thin film, neat): 2957, 1580, 1464,

1435, 1235, 746  $\text{cm}^{-1}$ ; HRMS (ESI):  $m/z$  calcd for  $\text{C}_{27}\text{H}_{28}\text{ClOS}$   $[\text{M}-\text{H}]^-$ : 435.1549; found :

435.1566.

**4-(3-bromo-9H-thioxanthen-9-yl)-2,6-di-*tert*-butylphenol (4h):** The reaction was

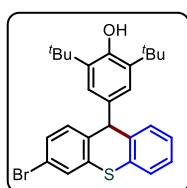

performed at 0.110 mmol scale of **3h**; white solid (35.0 mg, 68% yield); m.

p. = 196–198 °C;  $R_f$  = 0.4 (5% EtOAc in hexane);  $^1\text{H}$  NMR (400 MHz,

$\text{CDCl}_3$ )  $\delta$  7.29 (d,  $J$  = 2.0 Hz, 1H), 7.23 – 7.19 (m, 1H), 7.11 (dd,  $J$  = 8.1, 1.7

Hz, 2H), 7.08 (dd,  $J$  = 7.8, 1.6 Hz, 1H), 7.04 – 7.01 (m, 1H), 7.00 – 6.95 (m, 1H), 6.91 (s, 2H),

5.08 (s, 2H), 1.36 (s, 18H);  $^{13}\text{C}\{^1\text{H}\}$  NMR (100 MHz,  $\text{CDCl}_3$ )  $\delta$  152.7, 152.1, 151.1, 136.4,

136.1, 131.0, 129.7, 127.9, 126.3, 125.0, 124.9, 124.7, 123.7, 120.4, 119.7, 116.5, 44.2, 44.16,

34.4, 30.4; FT-IR (thin film, neat): 2956, 1595, 1475, 1274, 917, 755  $\text{cm}^{-1}$ ; HRMS (ESI):  $m/z$

calcd for  $\text{C}_{27}\text{H}_{29}\text{BrOS}$   $[\text{M}+\text{H}]^+$ : 481.1201; found : 481.1217.

**2,6-di-*tert*-butyl-4-(3-methoxy-9H-thioxanthen-9-yl)phenol (4i):** The reaction was

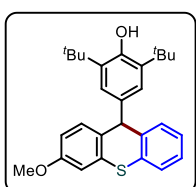

performed at 0.114 mmol scale of **3i**; pale yellow solid (36.4 mg, 73% yield);

m. p. = 90–92 °C;  $R_f$  = 0.3 (5% EtOAc in hexane);  $^1\text{H}$  NMR (400 MHz,

$\text{CDCl}_3$ )  $\delta$  7.44 – 7.42 (m, 1H), 7.39 – 7.37 (m, 1H), 7.28 (d,  $J$  = 8.5 Hz, 1H),

7.26 – 7.19 (m, 2H), 7.10 (d,  $J$  = 2.6 Hz, 1H), 6.93 (s, 2H), 6.81 (dd,  $J$  = 8.4, 2.6 Hz, 1H), 5.19

(s, 1H), 5.06 (s, 1H), 3.82 (s, 3H), 1.35 (s, 18H);  $^{13}\text{C}\{^1\text{H}\}$  NMR (100 MHz,  $\text{CDCl}_3$ )  $\delta$  158.2, 152.4, 138.4, 135.4, 134.1, 132.8, 132.1, 130.3, 130.2, 129.4, 128.5, 126.9, 126.6, 124.8, 113.0, 111.6, 55.6, 55.5, 52.34, 52.3, 34.4, 30.3, FT-IR (thin film, neat): 2956, 1600, 1435, 1246, 1056, 739  $\text{cm}^{-1}$ ; HRMS (ESI):  $m/z$  calcd for  $\text{C}_{28}\text{H}_{32}\text{O}_2\text{S}$   $[\text{M}-\text{H}]^-$ : 431.2045; found : 435.2049.

**4-(12H-benzo[a]thioxanthen-12-yl)-2,6-di-*tert*-butylphenol (4j):** The reaction was

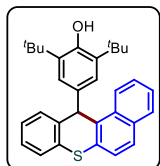

performed at 0.110 mmol scale of **3j**; white solid (35.0 mg, 70% yield); m. p. = 84–86 °C;  $R_f$  = 0.4 (5% EtOAc in hexane);  $^1\text{H}$  NMR (400 MHz,  $\text{CDCl}_3$ )  $\delta$  8.35 (d,  $J$  = 8.6, Hz, 1H), 7.87 – 7.85 (m, 1H), 7.73 (d,  $J$  = 8.5 Hz, 1H), 7.60 – 7.56 (m, 1H), 7.52 (d,  $J$  = 8.6 Hz, 1H), 7.49 – 7.45 (m, 2H), 7.30 (td,  $J$  = 7.4, 1.4 Hz, 1H), 7.26 – 7.22 (m, 2H), 6.90 (s, 2H), 6.24 (s, 1H), 4.97 (s, 1H), 1.24 (s, 18H);  $^{13}\text{C}\{^1\text{H}\}$  NMR (100 MHz,  $\text{CDCl}_3$ )  $\delta$  152.4, 137.3, 135.3, 132.8, 132.6, 132.3, 132.2, 131.8, 131.0, 130.0, 129.0, 127.2, 127.0, 126.8, 126.75, 126.7, 125.4, 125.2, 124.4, 122.9, 47.0, 34.3, 30.2; FT-IR (thin film, neat): 2956, 1592, 1435, 1235, 806, 740  $\text{cm}^{-1}$ ; HRMS (ESI):  $m/z$  calcd for  $\text{C}_{31}\text{H}_{32}\text{OS}$   $[\text{M}-\text{H}]^-$  : 451.2096; found : 451.2088.

## 7. Characterization of products 6b to 6e

**2,6-di-*tert*-butyl-4-(10-methyl-10H-indolo[1,2-*a*]indol-11-yl)phenol (6b):** The reaction was

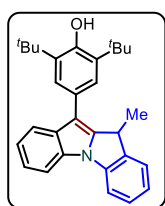

performed at 0.094 mmol scale of **5b**; Greyish gummy solid (37 mg, 92% yield);  $R_f$  = 0.4 (5% EtOAc in hexane);  $^1\text{H}$  NMR (400 MHz,  $\text{CDCl}_3$ )  $\delta$  7.89 (d,  $J$  = 7.9 Hz, 1H), 7.82 (d,  $J$  = 8.2 Hz, 1H), 7.62 – 7.60 (m, 1H), 7.56 (s, 2H), 7.44 – 7.32 (m, 3H), 7.27 – 7.23 (m, 1H), 7.14 (td,  $J$  = 7.5, 0.6 Hz, 1H), 5.22 (s, 1H), 4.55 (q,  $J$  = 7.2 Hz 1H), 1.57 – 1.55 (m, 21H);  $^{13}\text{C}\{^1\text{H}\}$  NMR (100 MHz,  $\text{CDCl}_3$ )  $\delta$  152.3, 143.4, 140.6, 139.8, 136.1, 131.9, 130.8, 128.0, 125.6, 124.9, 124.8, 122.6, 122.1, 120.7, 120.3, 112.5, 110.9, 110.5, 36.3, 34.7, 30.6, 17.6; FT-IR (thin film, neat FT-IR (thin film, neat): 3634, 2955, 1603, 1492, 1312, 740  $\text{cm}^{-1}$ ; HRMS (ESI):  $m/z$  calcd for  $\text{C}_{30}\text{H}_{34}\text{NO}$   $[\text{M}+\text{H}]^+$  : 424.2640; found : 424.2620.

**4-(9-chloro-10H-indolo[1,2-*a*]indol-11-yl)-2,6-di-*tert*-butylphenol (6c):** The reaction was

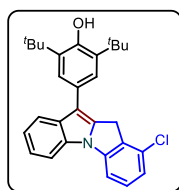

performed at 0.009 mmol scale of **5c**; Greyish gummy solid (36 mg, 90% yield);  $R_f = 0.4$  (5% EtOAc in hexane);  $^1\text{H NMR}$  (400 MHz,  $\text{CDCl}_3$ )  $\delta$  7.93 (d,  $J = 7.9$  Hz, 1H), 7.76 (d,  $J = 8.0$  Hz, 1H), 7.59 (d,  $J = 1.1$  Hz, 1H), 7.54 (s, 2H), 7.52 – 7.49 (m, 1H), 7.36 – 7.32 (m, 1H), 7.26 (s, 2H), 5.25 (s, 1H), 4.21 (s, 2H), 1.53 (s, 18H);  $^{13}\text{C}\{^1\text{H}\}$  NMR (100 MHz,  $\text{CDCl}_3$ )  $\delta$  152.4, 137.7, 136.5, 135.8, 131.5, 131.1, 130.9, 129.2, 125.9, 124.4, 122.2, 122.19, 121.2, 120.5, 115.0, 112.5, 111.6, 110.9, 34.7, 30.6, 29.6; FT-IR (thin film, neat FT-IR (thin film, neat): 3674, 2926, 1743, 1493, 1378, 767  $\text{cm}^{-1}$ ; HRMS (ESI):  $m/z$  calcd for  $\text{C}_{29}\text{H}_{31}\text{ClNO}$   $[\text{M}+\text{H}]^+$  : 444.2094; found : 444.2076.

**2,6-di-*tert*-butyl-4-(9-bromo-10H-indolo[1,2-*a*]indol-11-yl)phenol (6d):** The reaction was

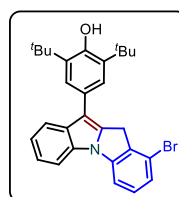

performed at 0.081 mmol scale of **5d**; Greyish gummy solid (38 mg, 95% yield);  $R_f = 0.4$  (5% EtOAc in hexane);  $^1\text{H NMR}$  (400 MHz,  $\text{CDCl}_3$ )  $\delta$  7.94 (d,  $J = 7.8$  Hz, 1H), 7.76 (d,  $J = 8.0$  Hz, 1H), 7.59 – 7.58 (m, 1H), 7.55 (s, 2H), 7.38 – 7.34 (m, 2H), 7.31 – 7.26 (m, 1H), 7.09 (dd,  $J = 7.9, 1.8$  Hz, 1H), 5.26 (s, 1H), 4.15 (s, 2H), 1.55 (s, 18H);  $^{13}\text{C}\{^1\text{H}\}$  NMR (100 MHz,  $\text{CDCl}_3$ )  $\delta$  152.4, 142.4, 138.3, 136.4, 133.7, 132.0, 131.6, 131.1, 126.6, 125.8, 124.4, 122.3 (2C), 121.3, 120.4, 112.6, 111.1, 111.0, 34.7, 30.6, 29.3; 3640, 2924, 1599, 1493, 1305, 736  $\text{cm}^{-1}$ ; HRMS (ESI):  $m/z$  calcd for  $\text{C}_{29}\text{H}_{31}\text{BrNO}$   $[\text{M}+\text{H}]^+$  : 488.1589; found : 488.1613.

**2,6-di-*tert*-butyl-4-(7-methoxy-10H-indolo[1,2-*a*]indol-11-yl)phenol (6e):** The reaction was

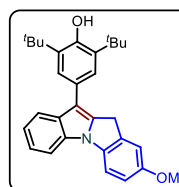

performed at 0.091 mmol scale of **5e**; Greyish gummy solid (30 mg, 75% yield);  $R_f = 0.3$  (5% EtOAc in hexane);  $^1\text{H NMR}$  (400 MHz,  $\text{CDCl}_3$ )  $\delta$  7.96 (d,  $J = 7.9$  Hz, 1H), 7.77 (d,  $J = 8.0$  Hz, 1H), 7.58 (s, 2H), 7.52 (d,  $J = 8.5$  Hz, 1H), 7.35 – 7.31 (m, 1H), 7.27 – 7.23 (m, 1H), 7.09 (d,  $J = 2.4$  Hz, 1H), 6.93 (dd,  $J = 8.5, 2.5$  Hz, 1H), 5.24 (s, 1H), 4.20 (s, 2H), 3.86 (s, 3H), 1.55 (s, 18H);  $^{13}\text{C}\{^1\text{H}\}$  NMR (100 MHz,  $\text{CDCl}_3$ )  $\delta$  155.9, 152.1, 138.3, 136.4, 135.5, 135.1, 131.0, 130.9, 126.4, 124.3, 121.8, 120.5,

120.3, 113.1, 112.3, 111.7, 110.64, 110.6, 56.0, 55.96, 34.7, 30.6, 30.1; FT-IR (thin film, neat) FT-IR (thin film, neat): 3644, 2922, 1599, 1498, 1247, 737  $\text{cm}^{-1}$ ; HRMS (ESI):  $m/z$  calcd for  $\text{C}_{30}\text{H}_{34}\text{NO}_2$   $[\text{M}+\text{H}]^+$  : 440.2590; found : 440.2575.

### 8. Unsuccessful attempts

A reaction has been tried with a *p*-QM having isopropyl groups in the 2- and 6-positions of *p*-QM. In this case, we found that the reaction was proceeding. However, unfortunately, we were unable to isolate the product purest form. For reference, spectra for both the starting material as well as the product are given at the end of the SI.

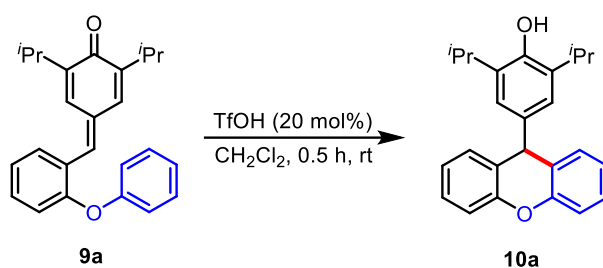

**Scheme 4.** Reaction with *p*-QM having isopropyl groups.

Other electrophiles such as cinnamaldehyde and ethyl-cinnamate were also subjected to react under the standard reaction condition. However, in those cases, we did not observe any product formation under standard reaction condition as well as at elevated temperature.

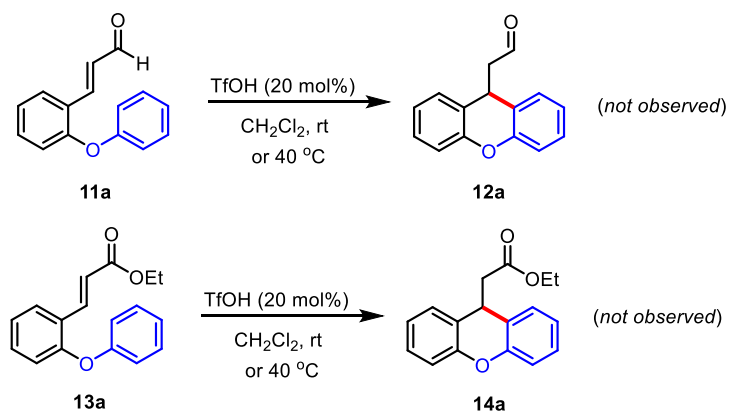

**Scheme 5.** Reaction with other Electrophiles

### 9. References:

- (a) W. -D. Chu, L. -F. Zhang, X. Bao, X. -H. Zhao, C. Zeng, J. -Y. Du, G. -B. Zhang, F. -X. Wang, X. -Y. Ma, and C. -A. Fan, *Angew. Chem. Int. Ed.*, 2013, **52**, 9229. (b) V. Reddy and R. V. Anand, *Org. Lett.* 2015., **17**, 3390.

<sup>1</sup>H NMR (400 MHz, CDCl<sub>3</sub>) spectrum of **1a**

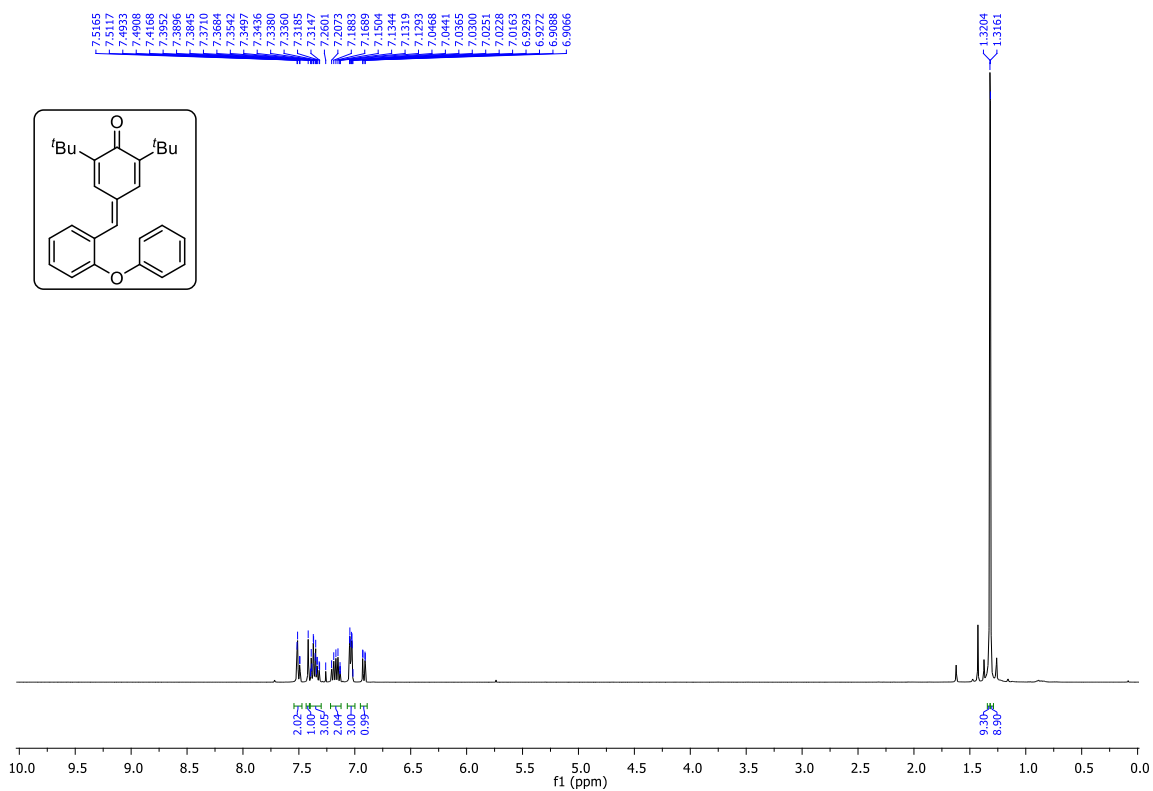

<sup>13</sup>C NMR (100 MHz, CDCl<sub>3</sub>) spectrum of **1a**

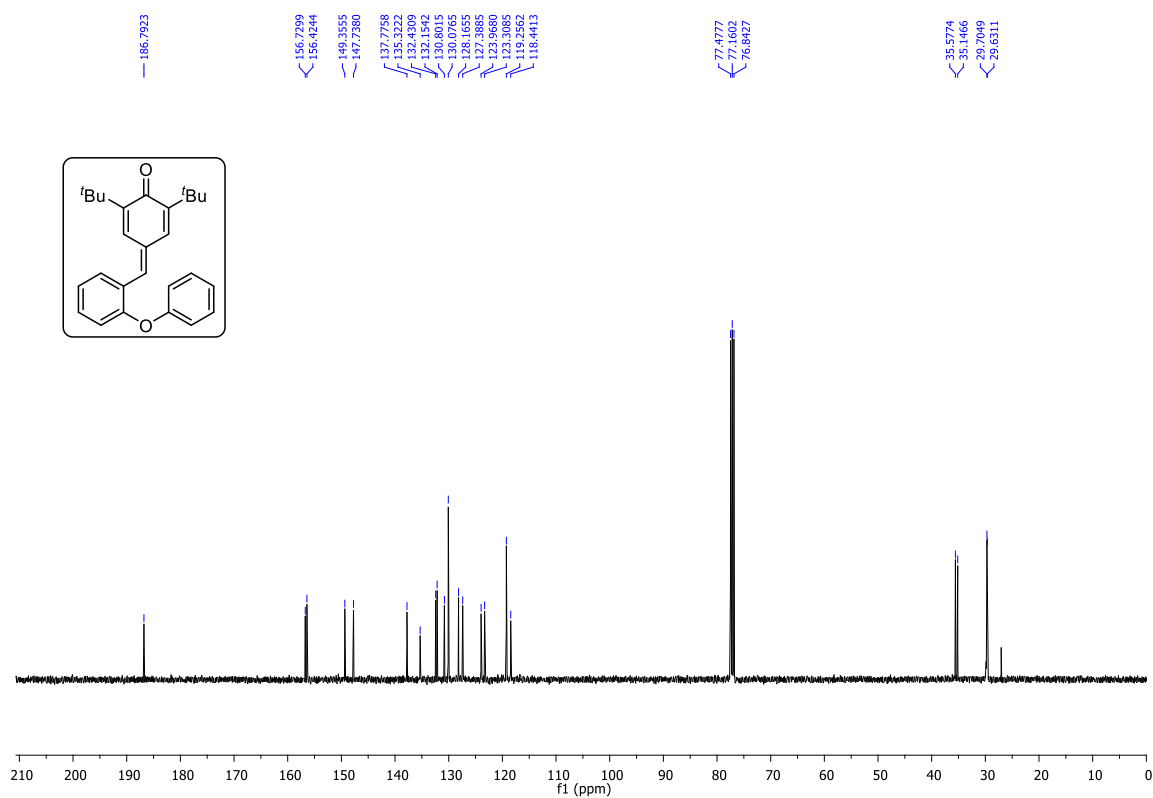

<sup>1</sup>H NMR (400 MHz, CDCl<sub>3</sub>) spectrum of **1b**

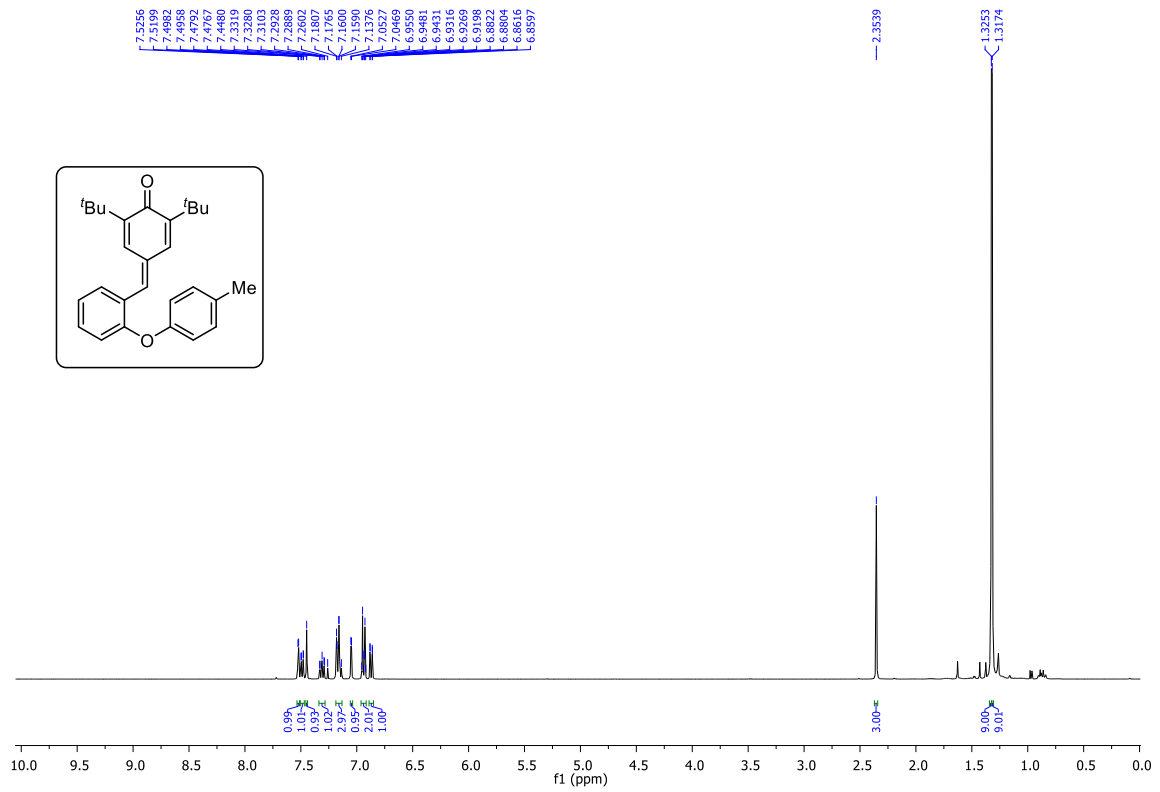

<sup>13</sup>C NMR (100 MHz, CDCl<sub>3</sub>) spectrum of **1b**

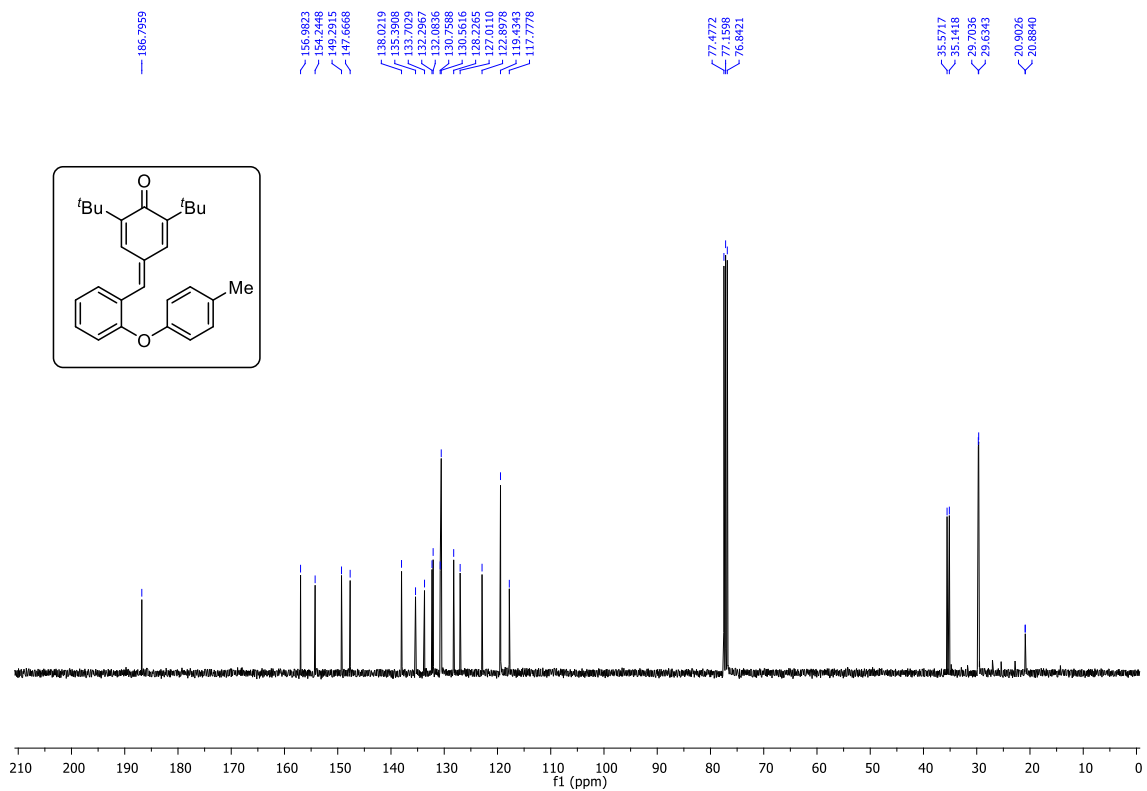

<sup>1</sup>H NMR (400 MHz, CDCl<sub>3</sub>) spectrum of **1c**

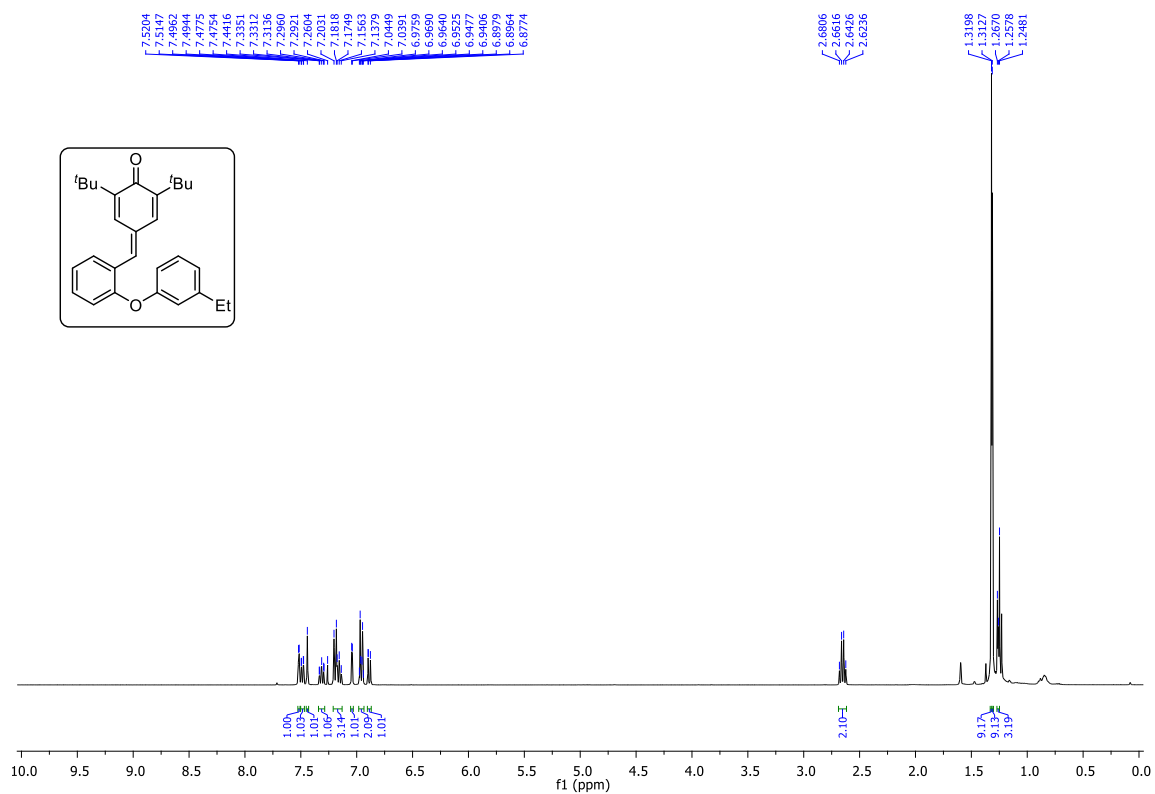

<sup>13</sup>C NMR (100 MHz, CDCl<sub>3</sub>) spectrum of **1c**

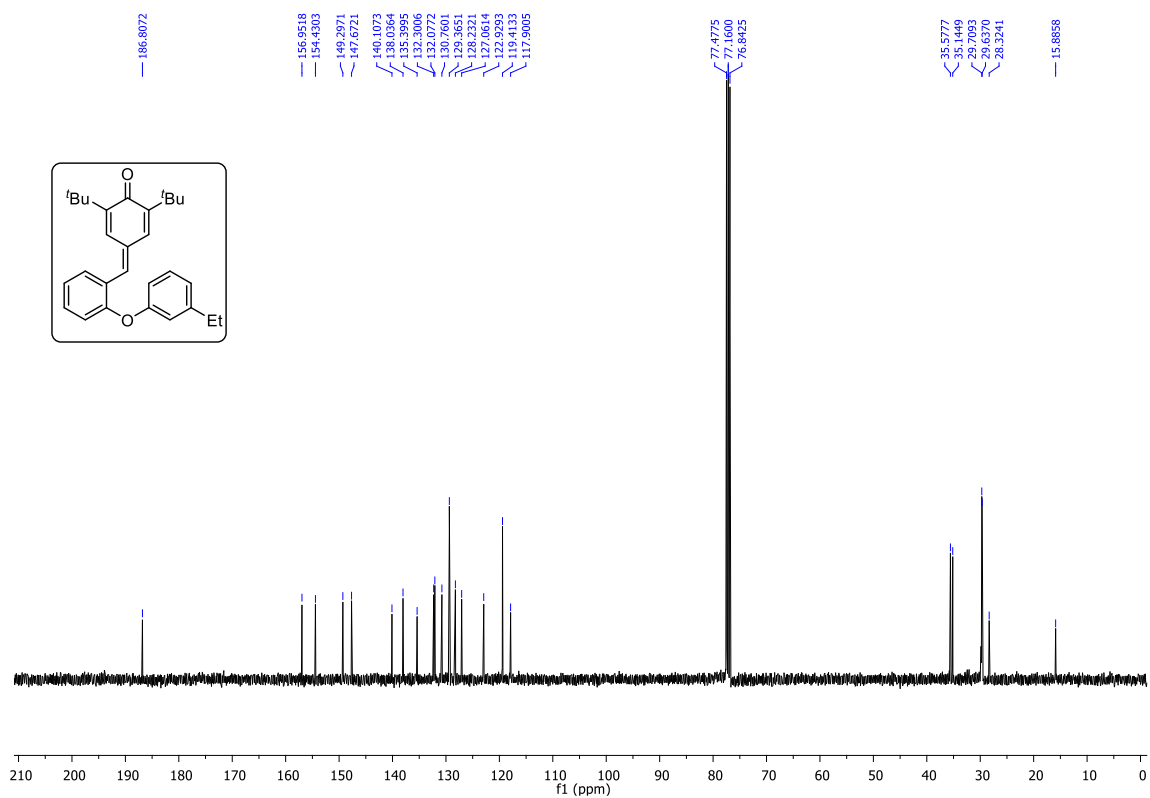

<sup>1</sup>H NMR (400 MHz, CDCl<sub>3</sub>) spectrum of **1d**

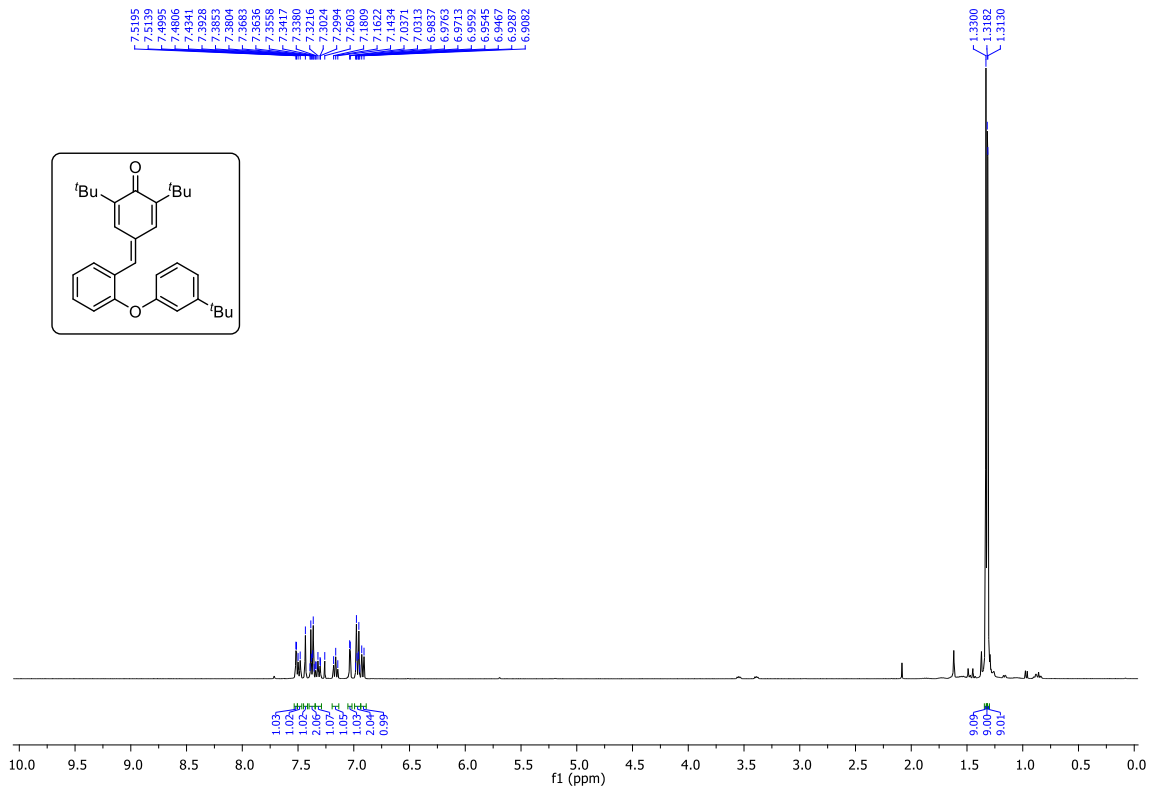

<sup>13</sup>C NMR (100 MHz, CDCl<sub>3</sub>) spectrum of **1d**

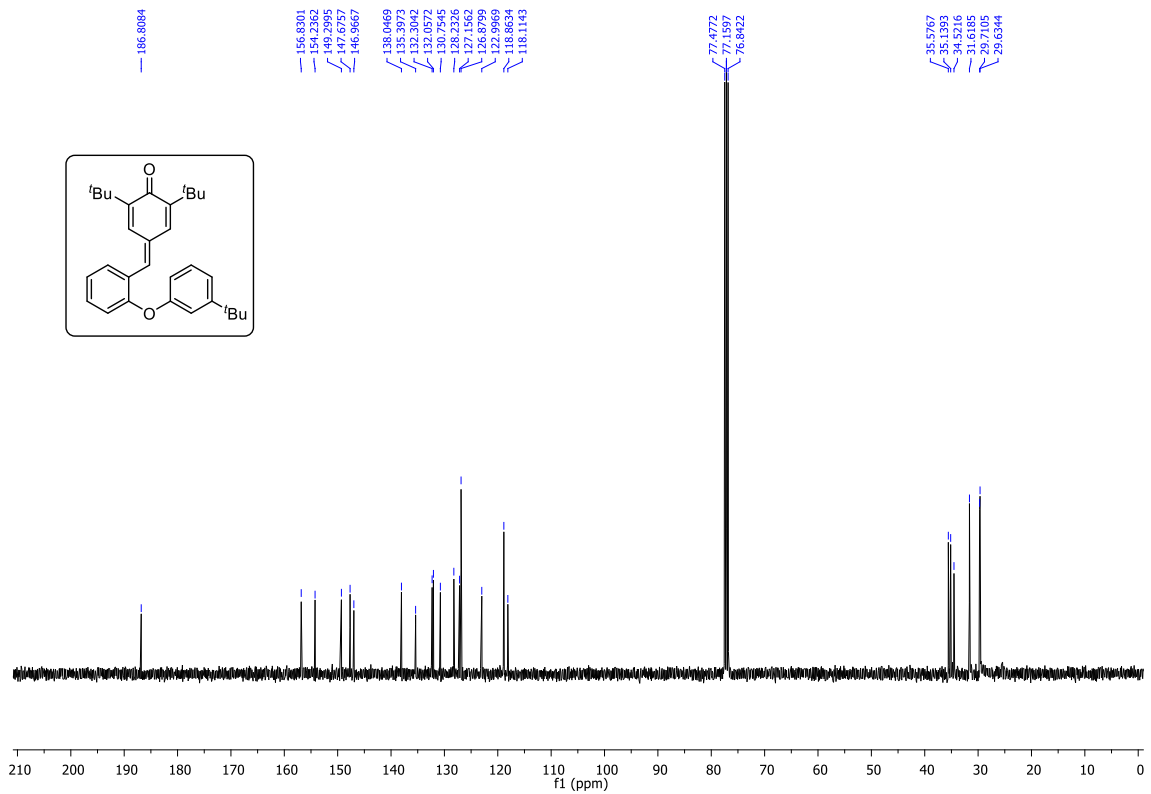



<sup>1</sup>H NMR (400 MHz, CDCl<sub>3</sub>) spectrum of **1e**

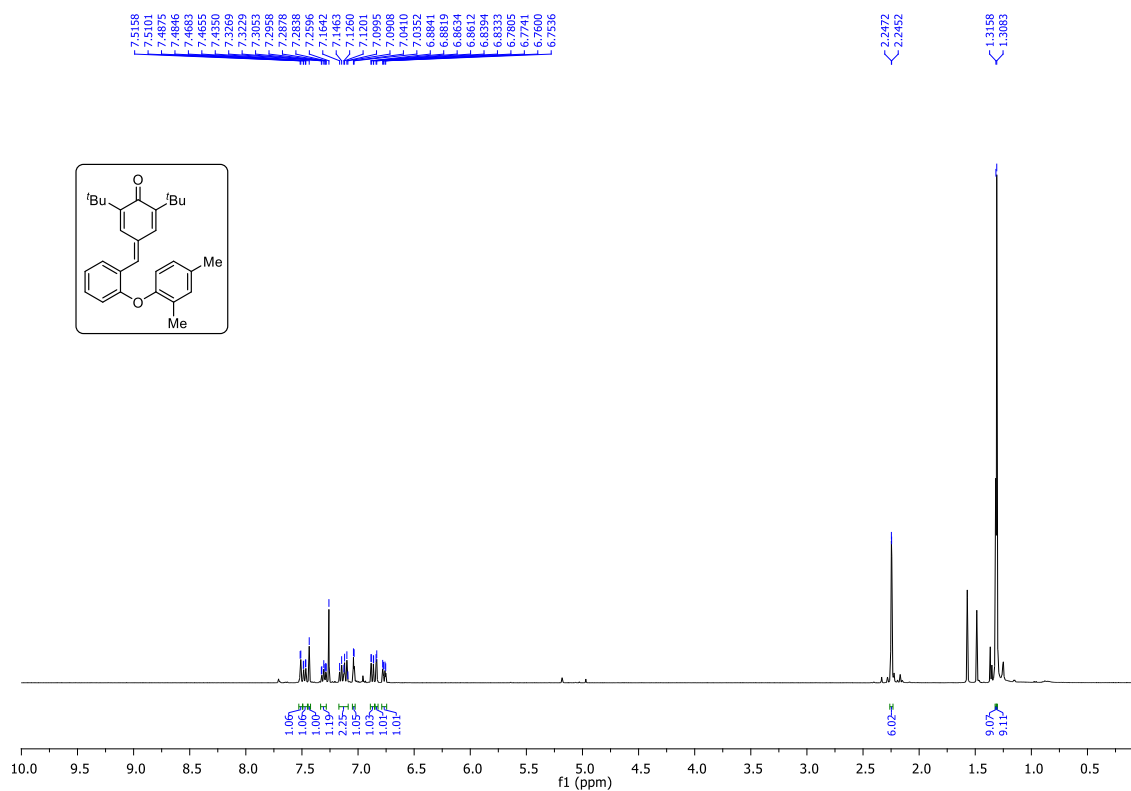

<sup>13</sup>C NMR (100 MHz, CDCl<sub>3</sub>) spectrum of **1e**

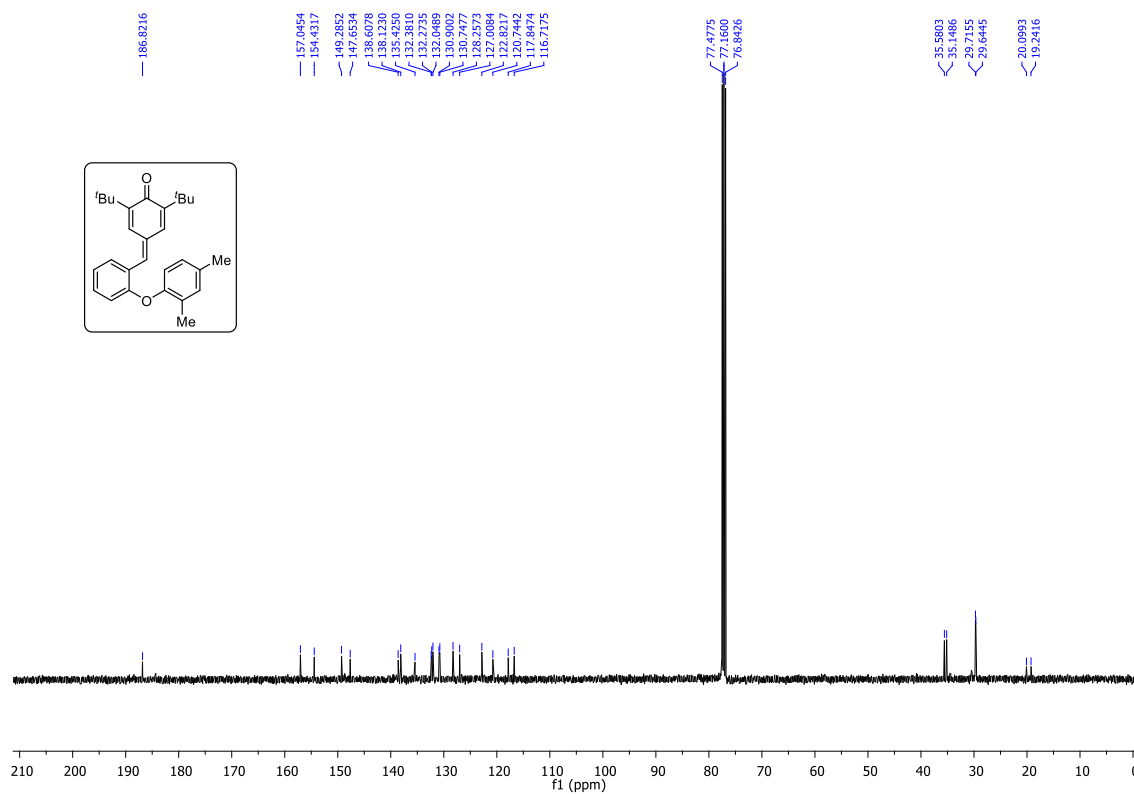

### <sup>1</sup>H NMR (400 MHz, CDCl<sub>3</sub>) spectrum of **1f**

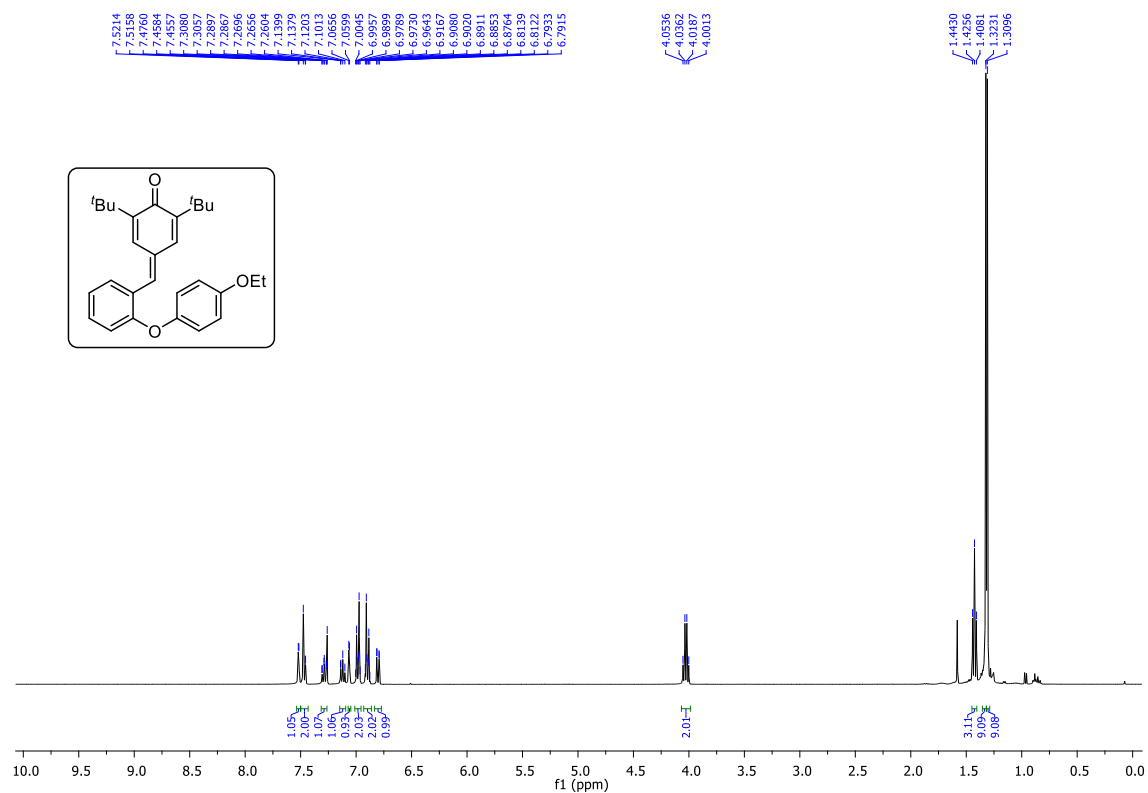

### <sup>13</sup>C NMR (100 MHz, CDCl<sub>3</sub>) spectrum of **1f**

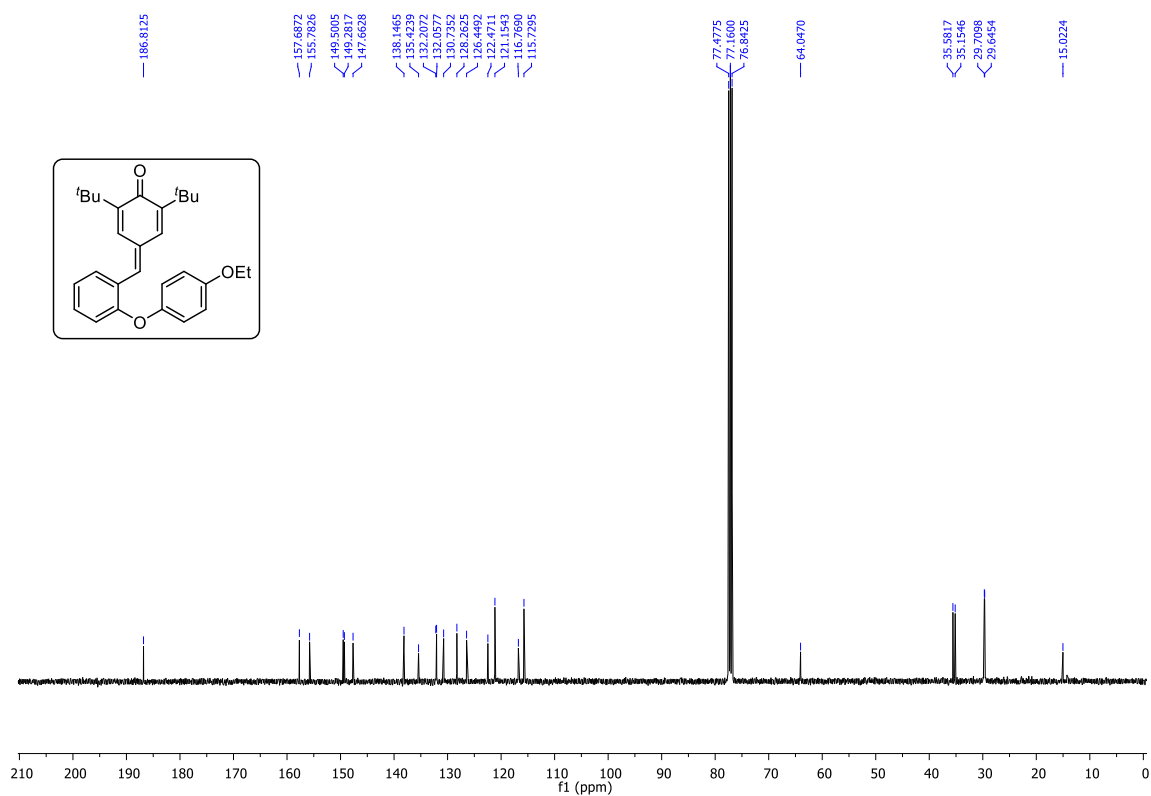

<sup>1</sup>H NMR (400 MHz, CDCl<sub>3</sub>) spectrum of **1g**

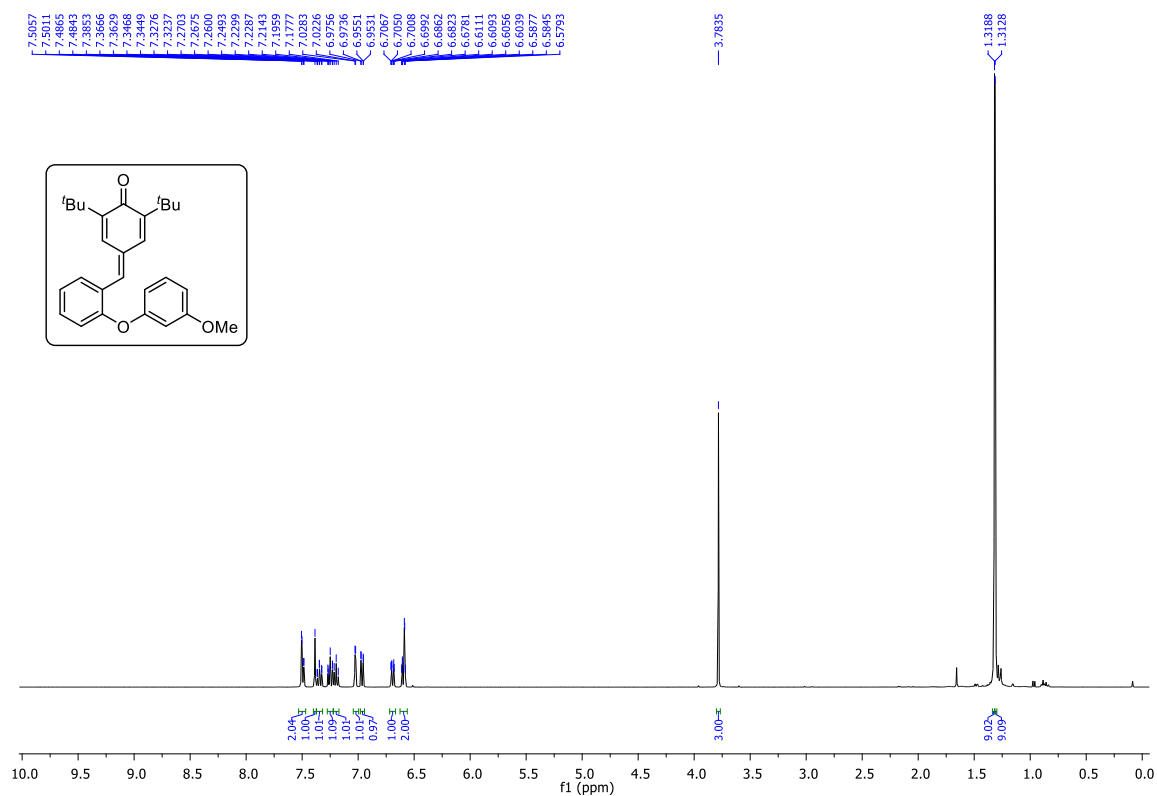

<sup>13</sup>C NMR (100 MHz, CDCl<sub>3</sub>) spectrum of **1g**

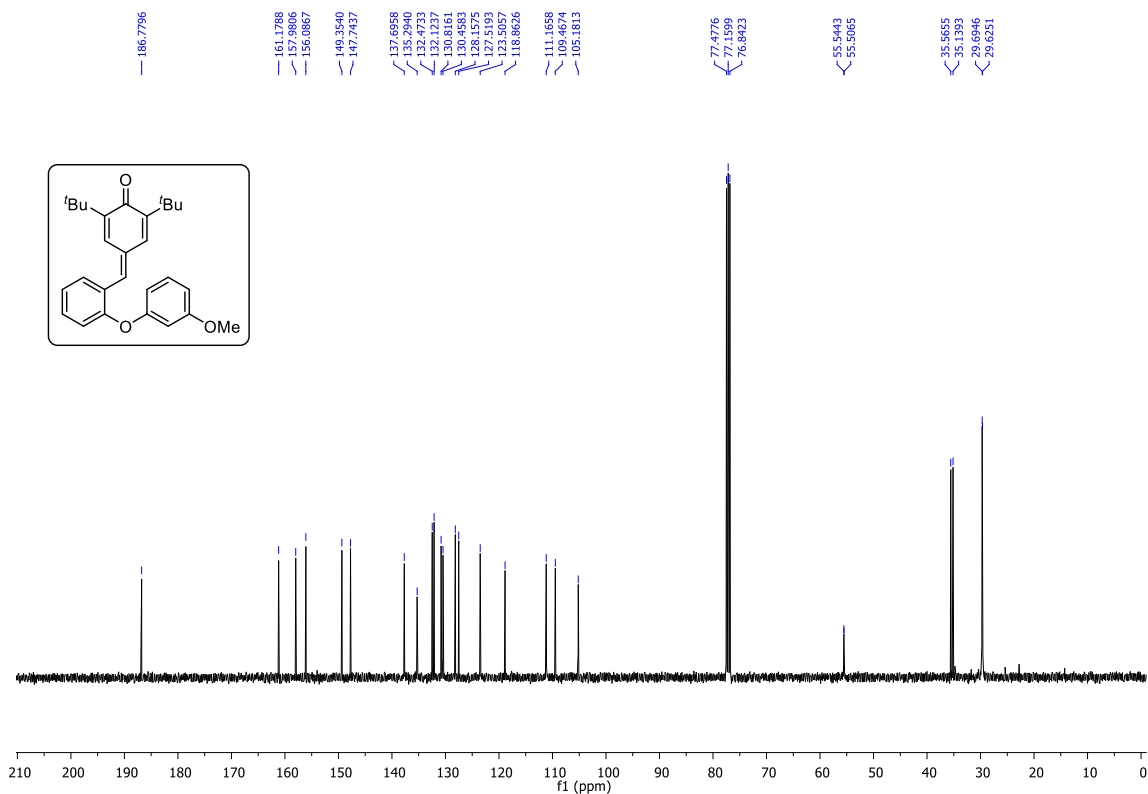

<sup>1</sup>H NMR (400 MHz, CDCl<sub>3</sub>) spectrum of **1h**

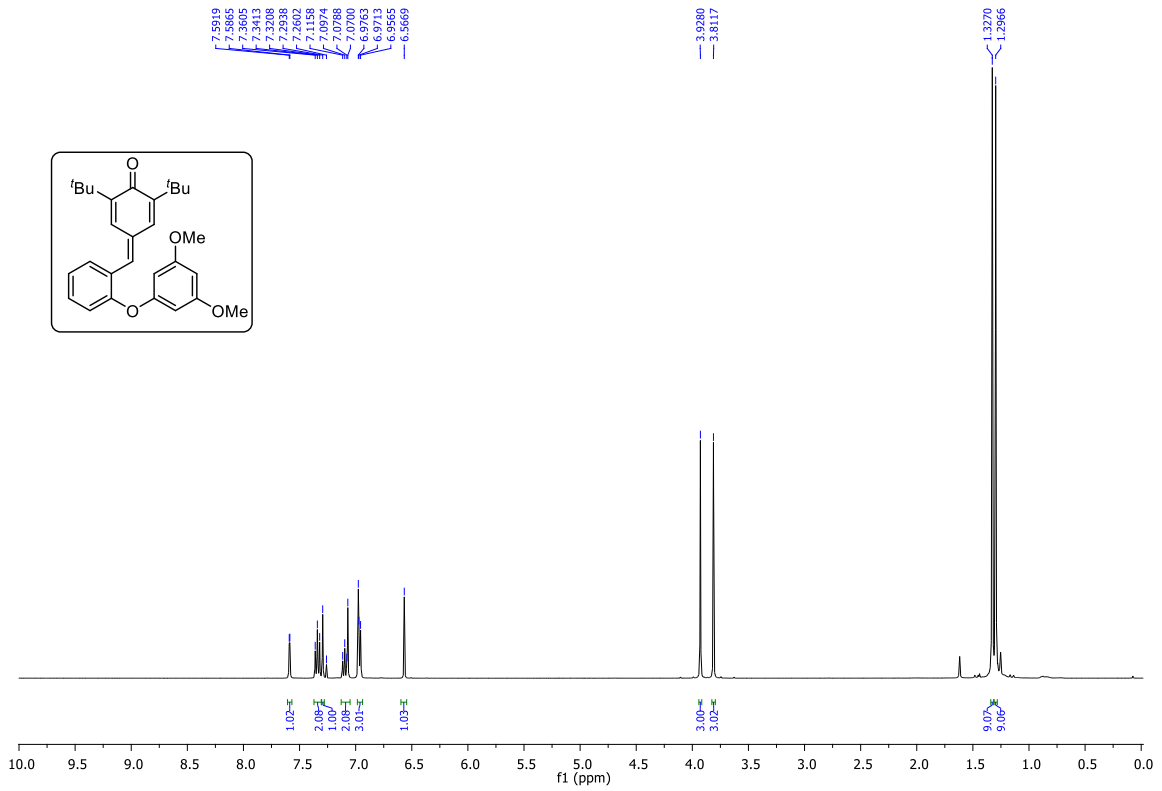

<sup>13</sup>C NMR (100 MHz, CDCl<sub>3</sub>) spectrum of **1h**

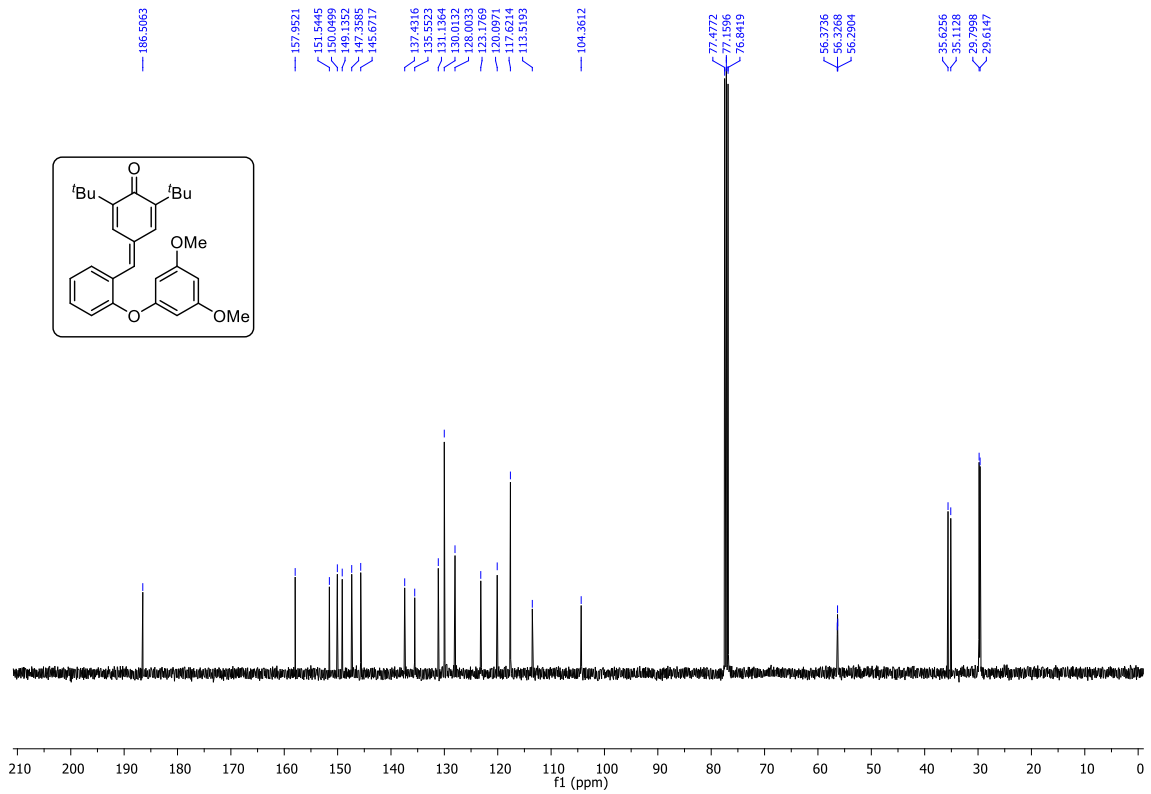

<sup>1</sup>H NMR (400 MHz, CDCl<sub>3</sub>) spectrum of **1i**

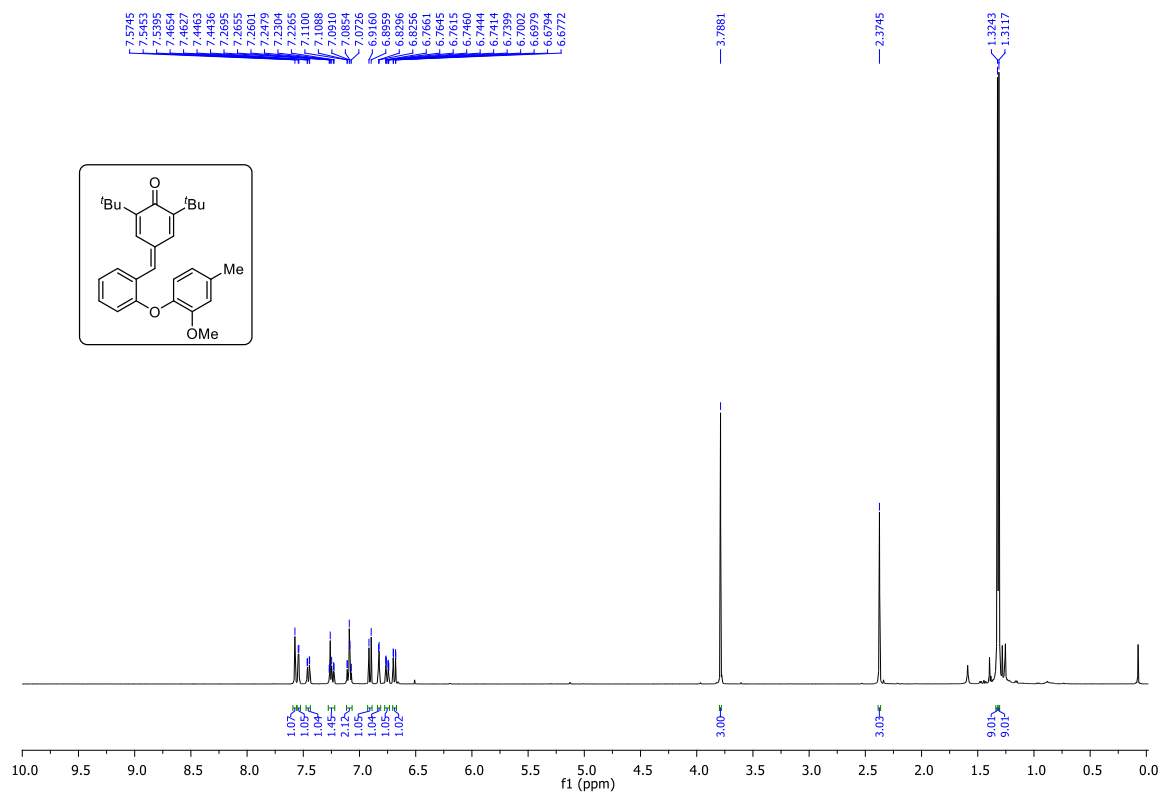

<sup>13</sup>C NMR (100 MHz, CDCl<sub>3</sub>) spectrum of **1i**

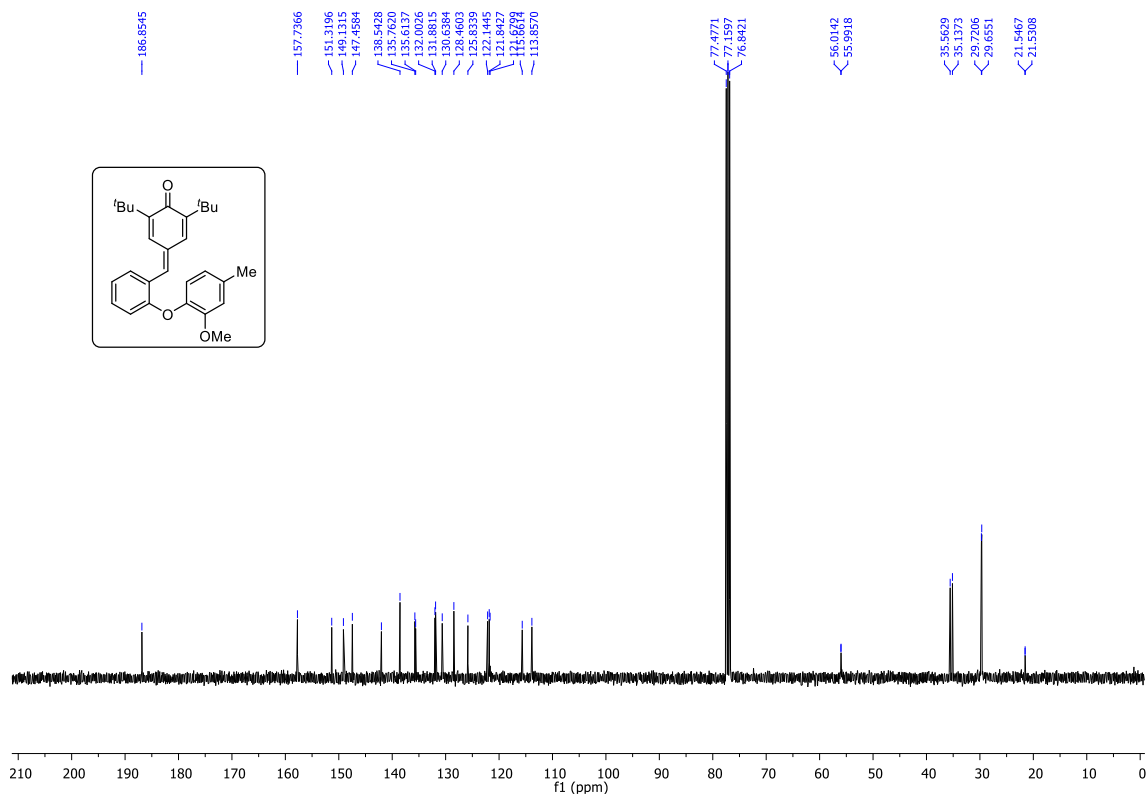

### <sup>1</sup>H NMR (400 MHz, CDCl<sub>3</sub>) spectrum of **1j**

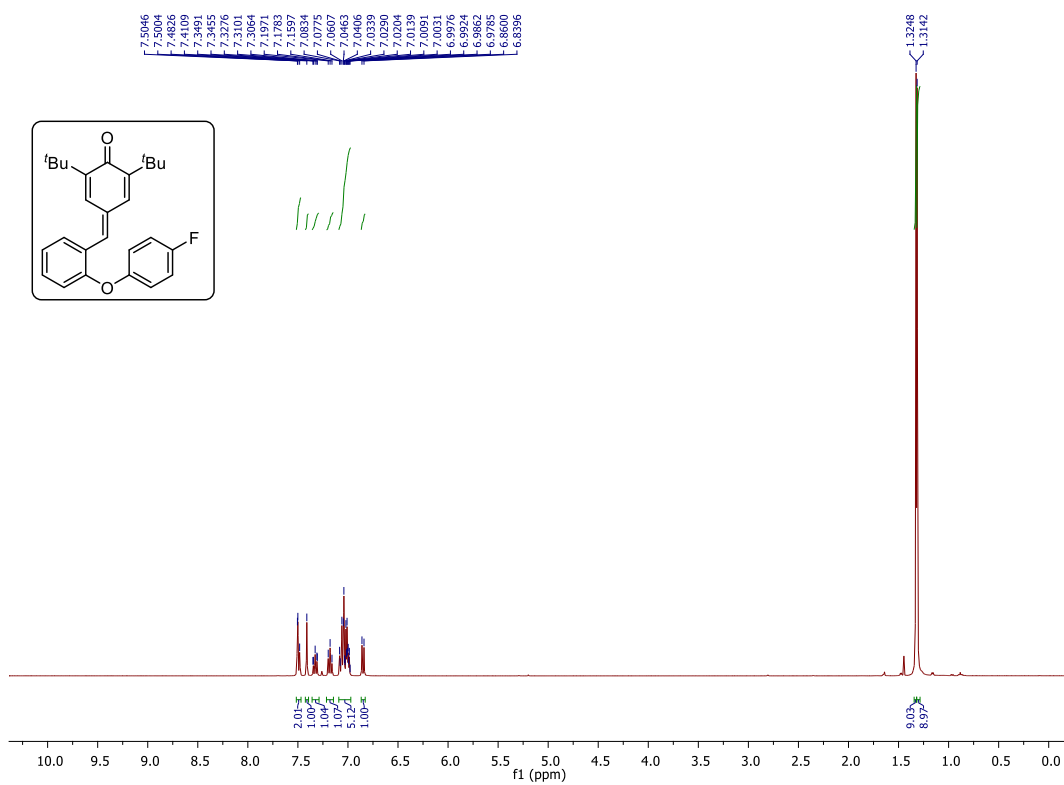

### <sup>13</sup>C NMR (100 MHz, CDCl<sub>3</sub>) spectrum of **1j**

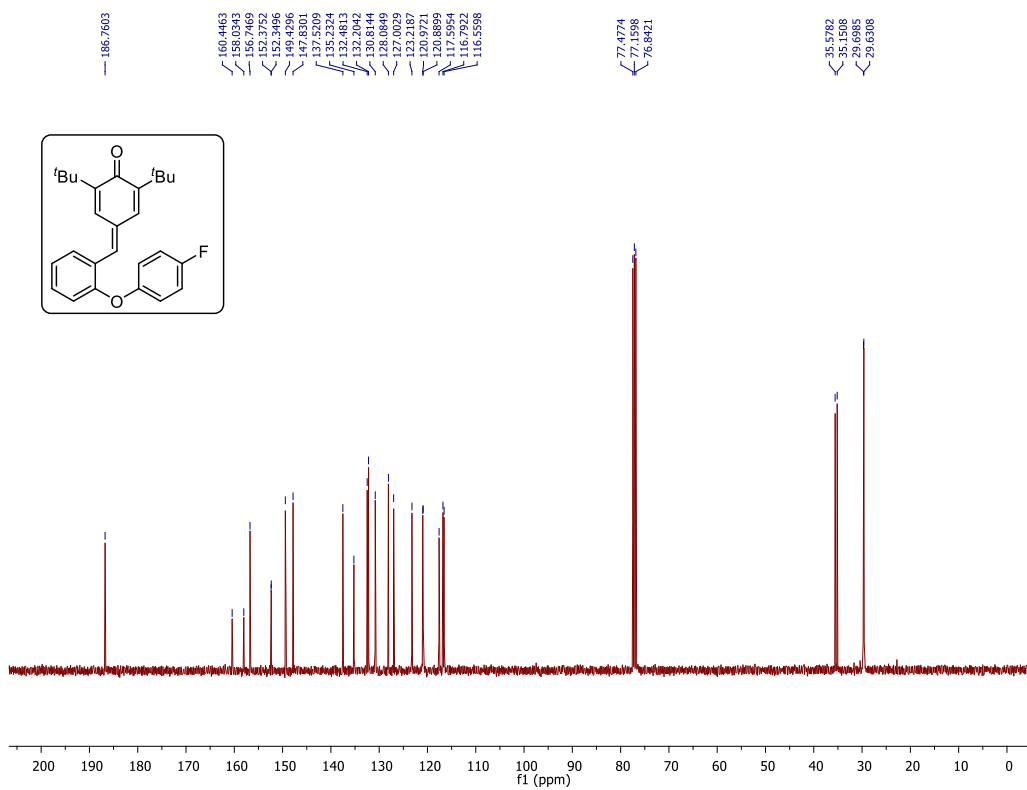

$^{19}\text{F}$   $\{^1\text{H}\}$  NMR (376 MHz,  $\text{CDCl}_3$ ) Spectrum of **1j**

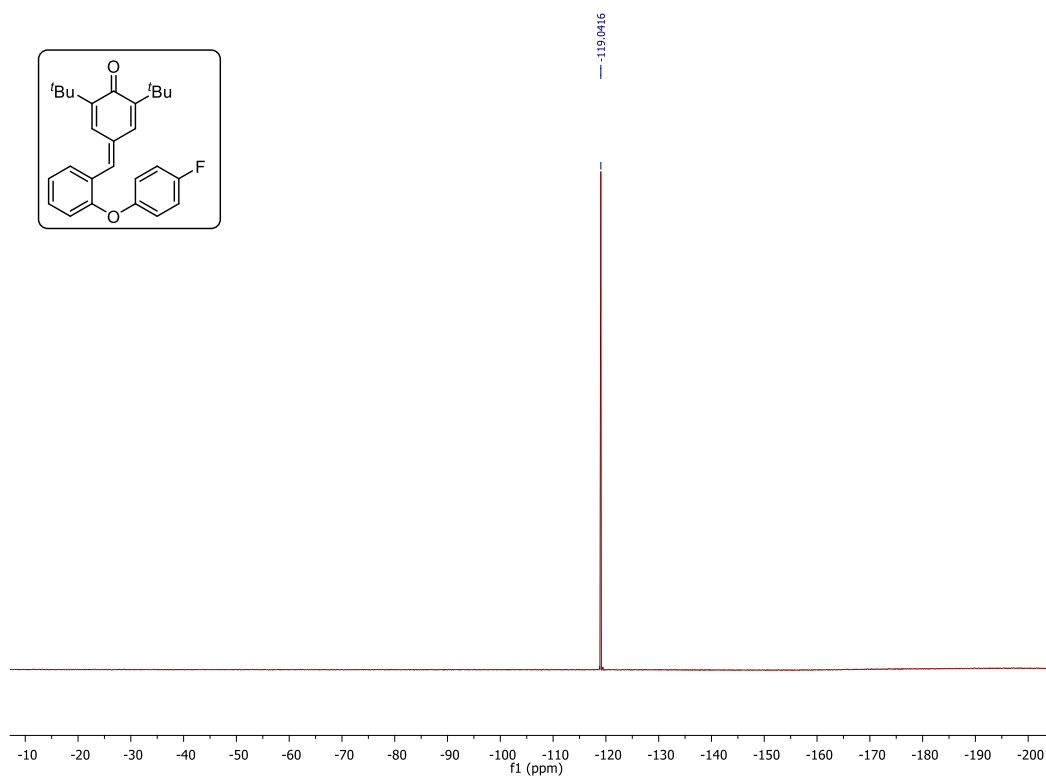

$^1\text{H}$  NMR (400 MHz,  $\text{CDCl}_3$ ) spectrum of **1k**

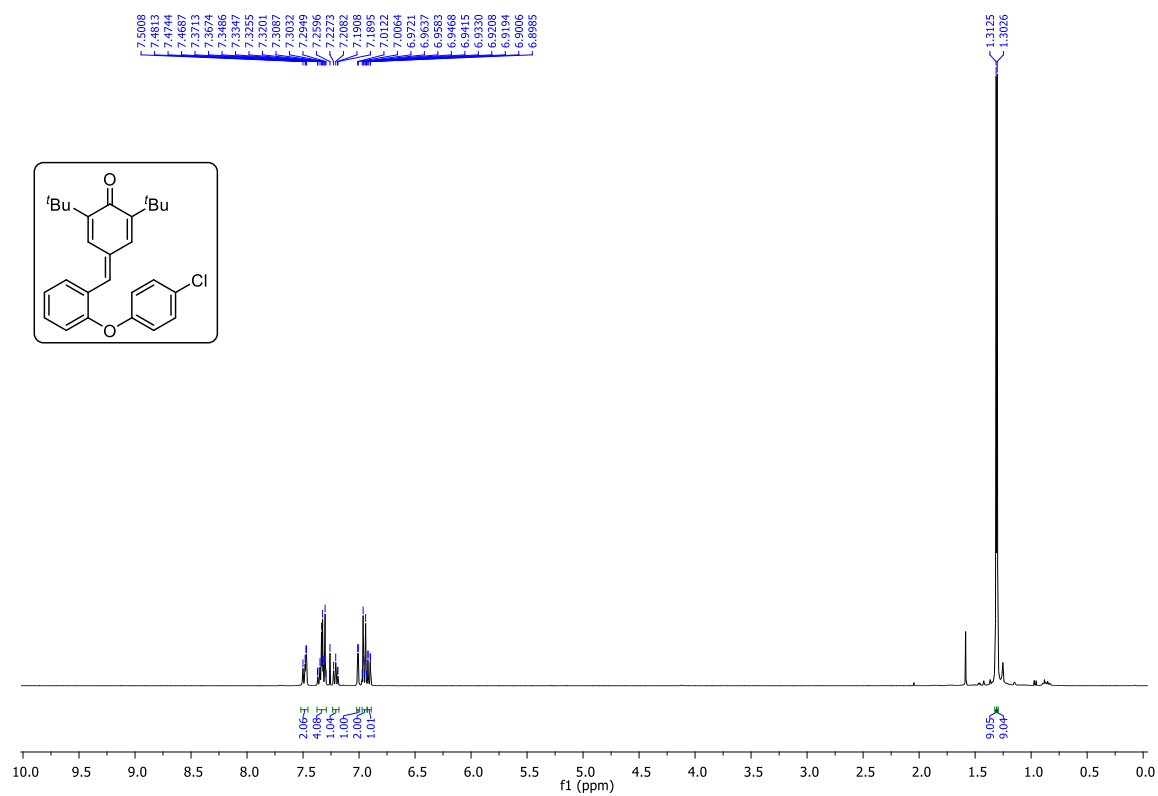

<sup>13</sup>C NMR (100 MHz, CDCl<sub>3</sub>) spectrum of **1k**

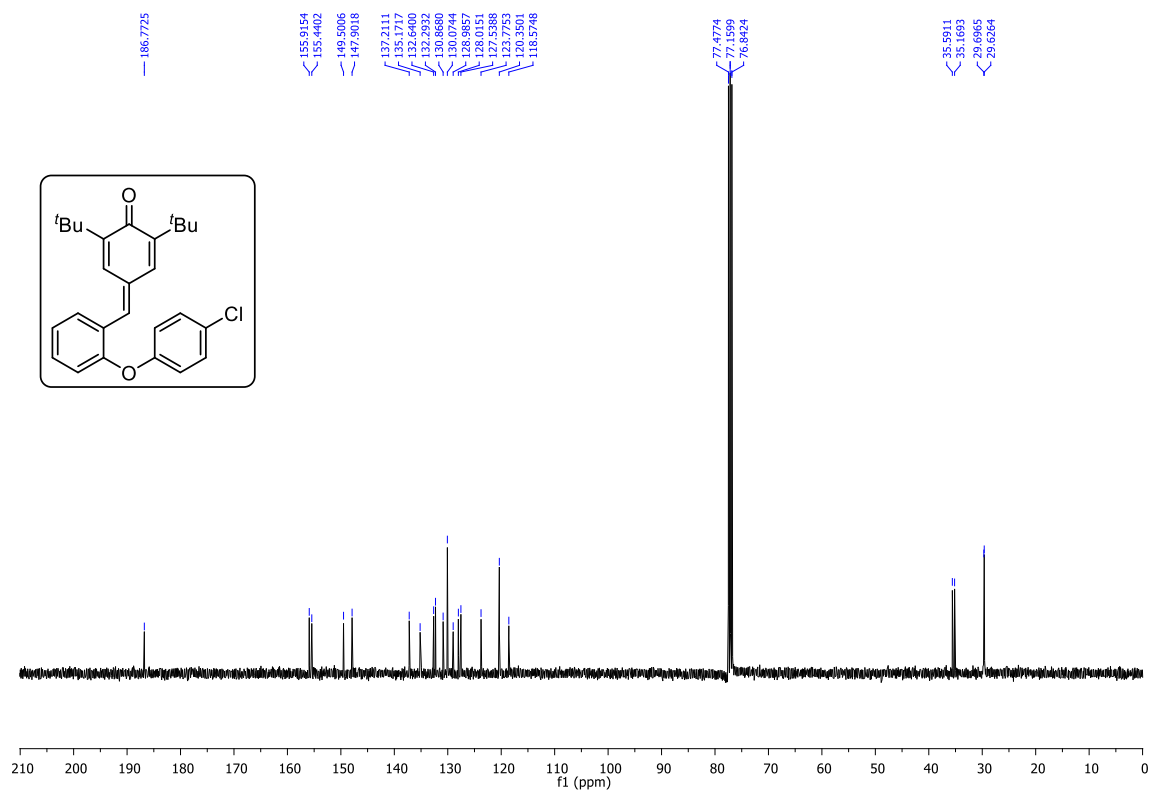

<sup>1</sup>H NMR (400 MHz, CDCl<sub>3</sub>) spectrum of **1l**

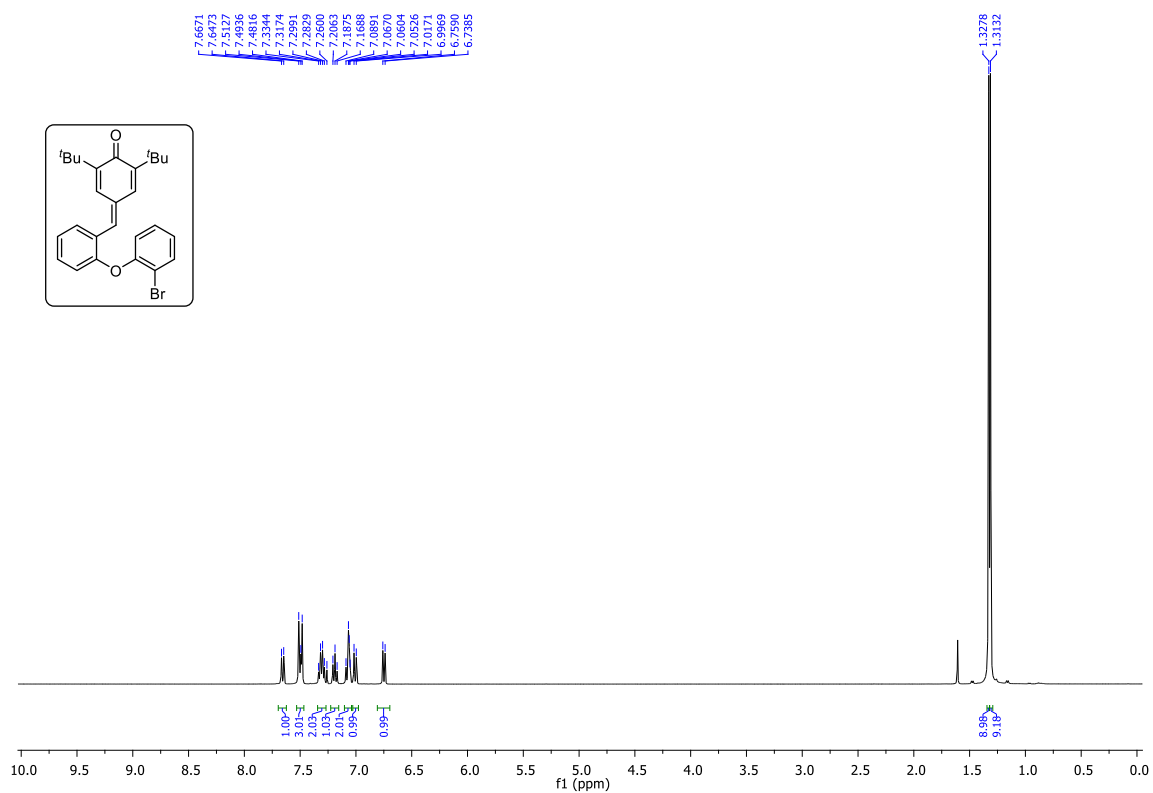



$^{13}\text{C}$  NMR (100 MHz,  $\text{CDCl}_3$ ) spectrum of **1l**

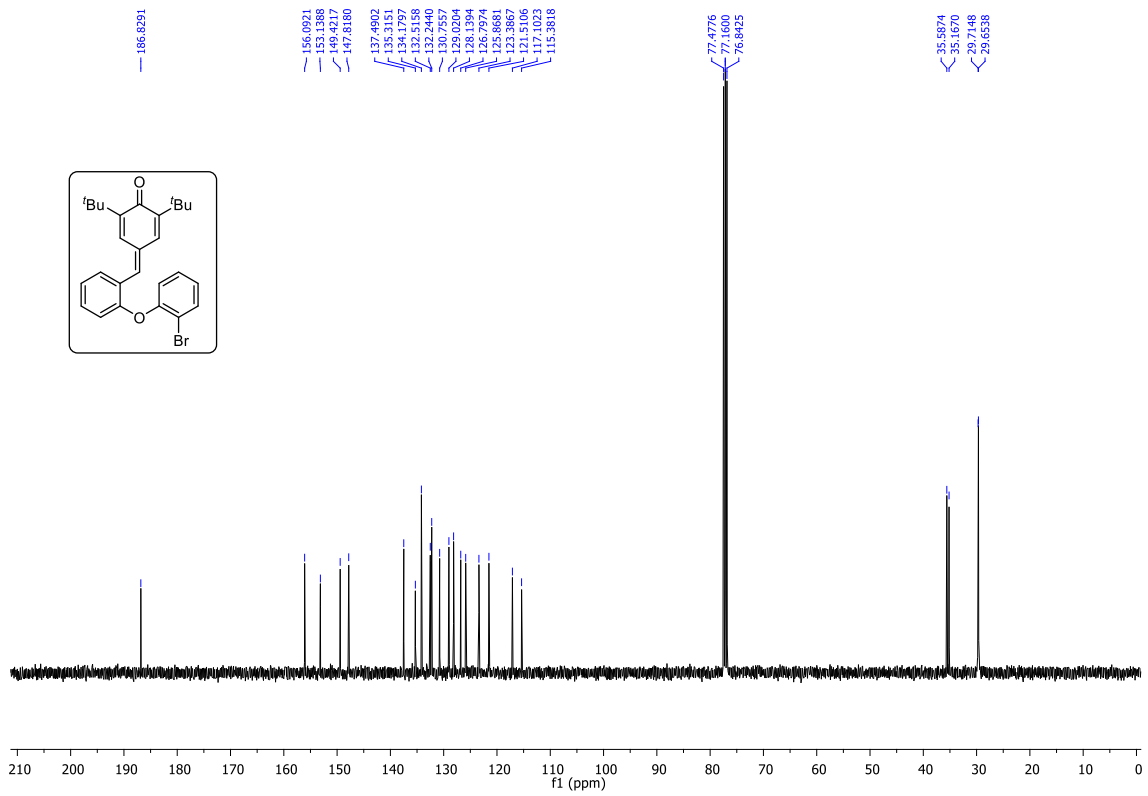

$^1\text{H}$  NMR (400 MHz,  $\text{CDCl}_3$ ) spectrum of **1m**

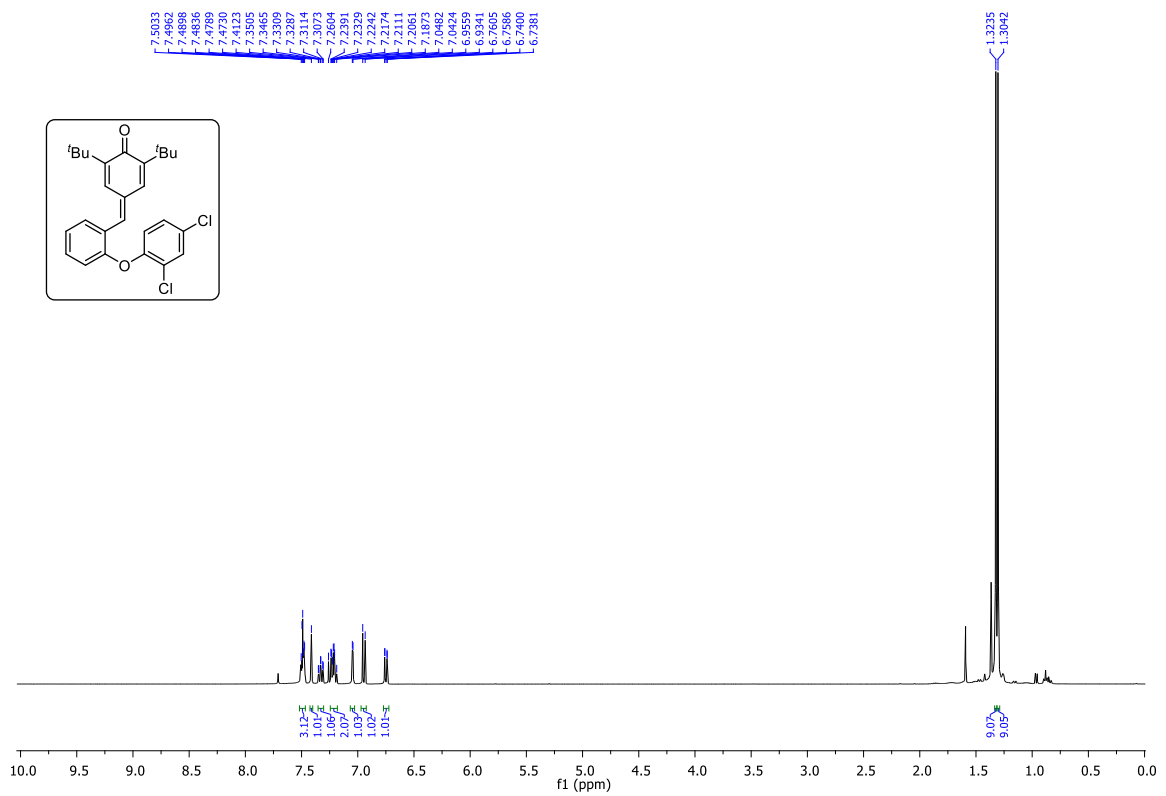

$^{13}\text{C}$  NMR (100 MHz,  $\text{CDCl}_3$ ) spectrum of **1m**

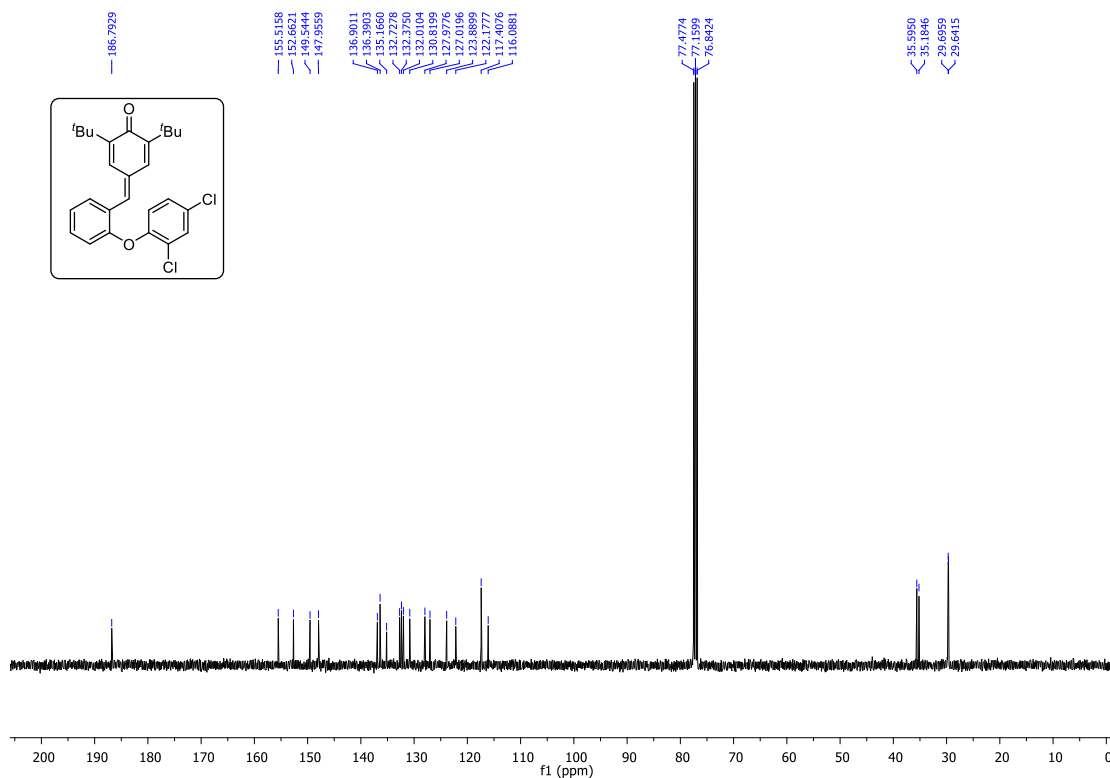

$^1\text{H}$  NMR (400 MHz,  $\text{CDCl}_3$ ) spectrum of **1n**

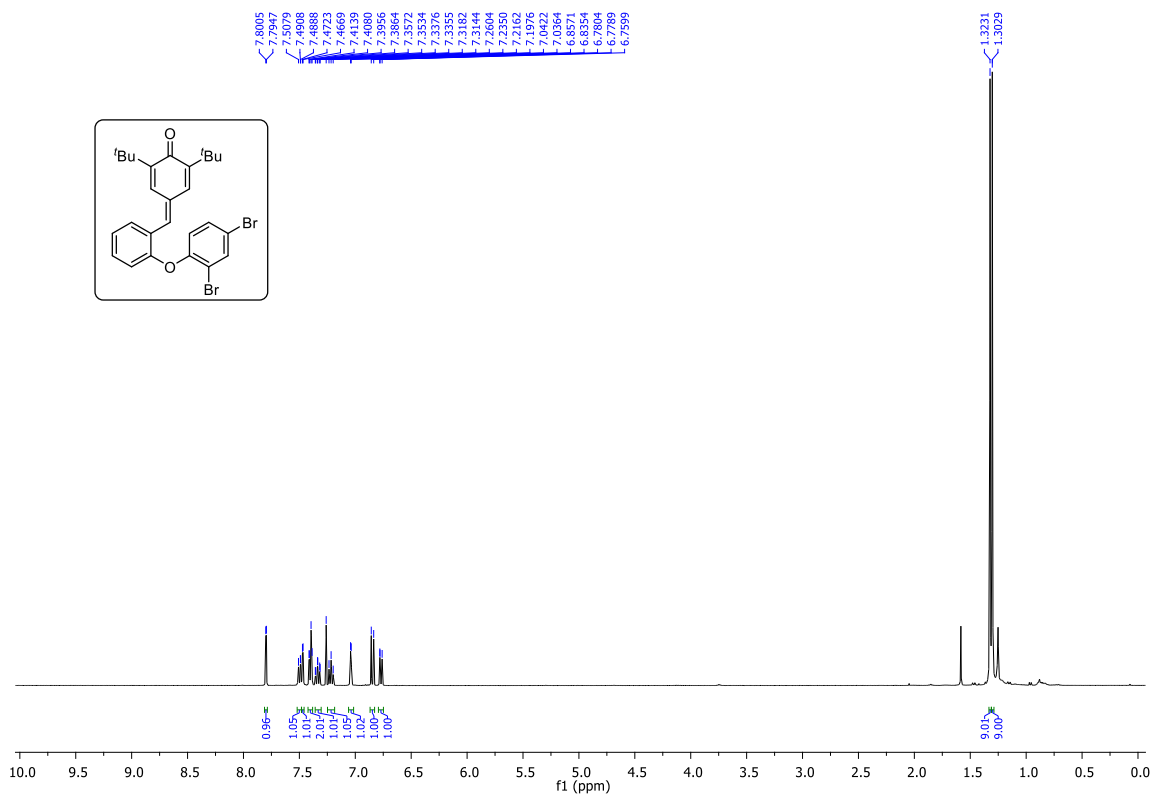

$^{13}\text{C}$  NMR (100 MHz,  $\text{CDCl}_3$ ) spectrum of **1n**

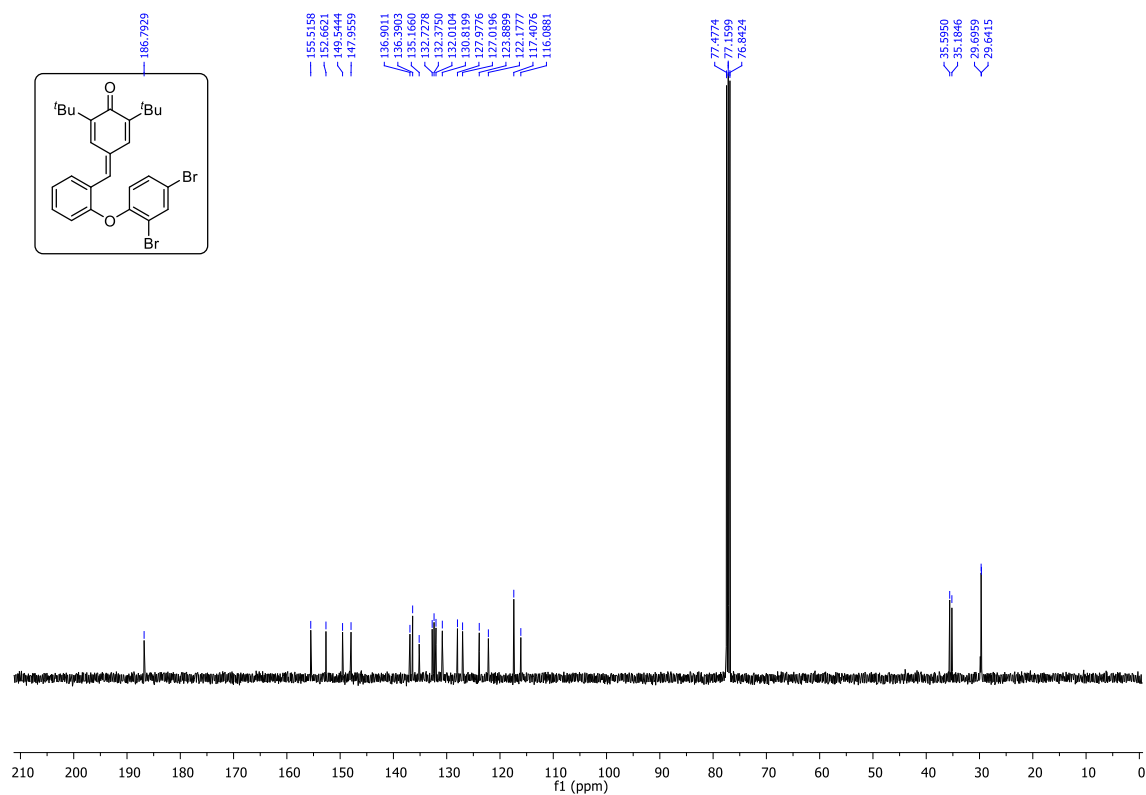

$^1\text{H}$  NMR (400 MHz,  $\text{CDCl}_3$ ) spectrum of **1o**

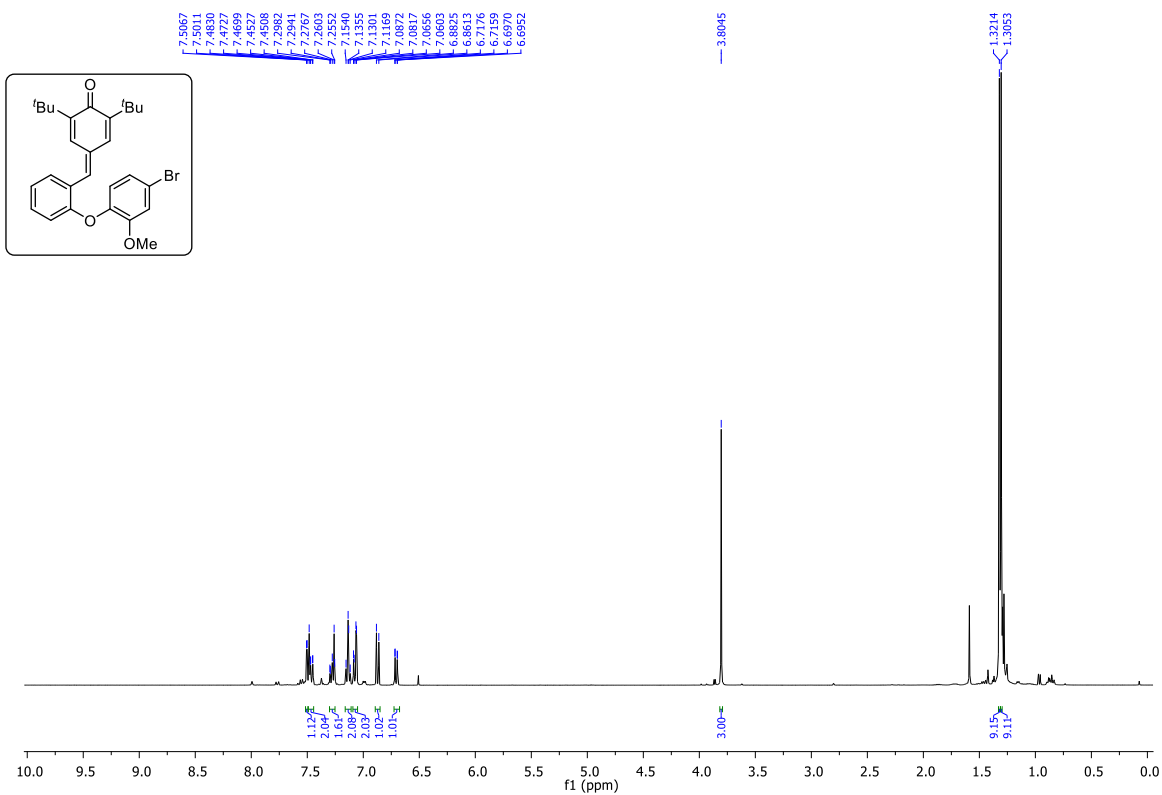

$^{13}\text{C}$  NMR (100 MHz,  $\text{CDCl}_3$ ) spectrum of **1o**

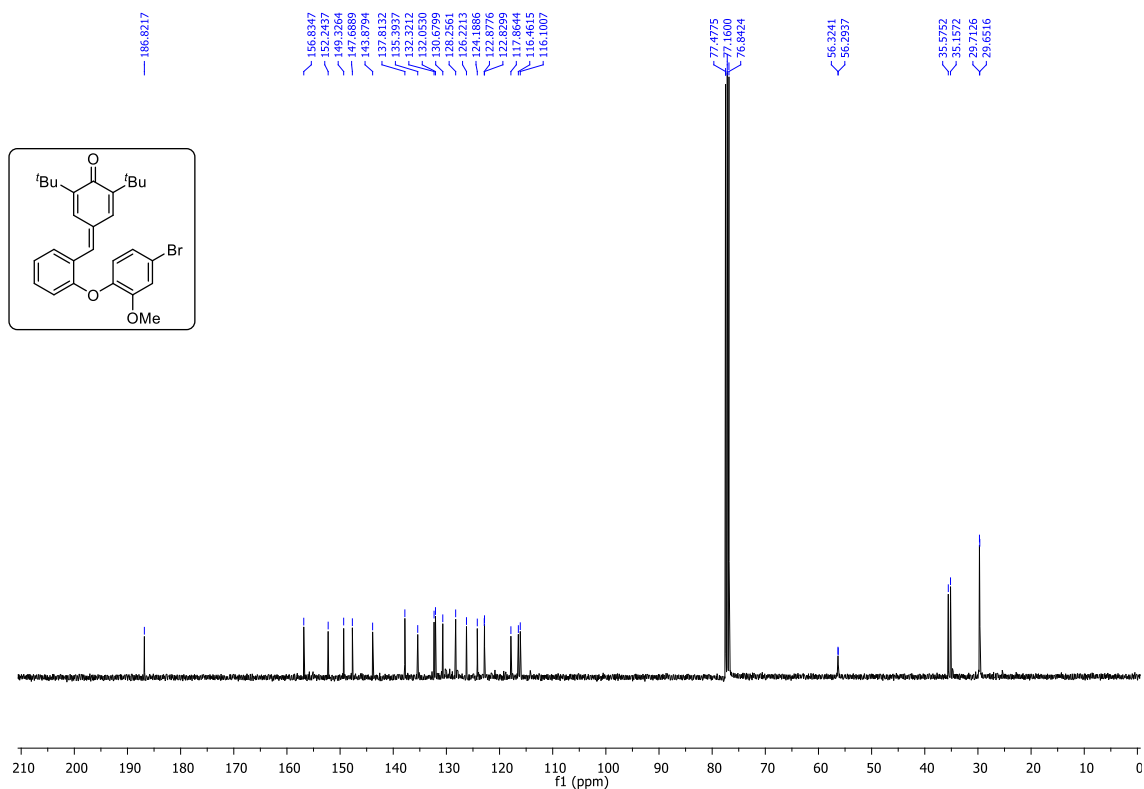

$^1\text{H}$  NMR (400 MHz,  $\text{CDCl}_3$ ) spectrum of **1p**

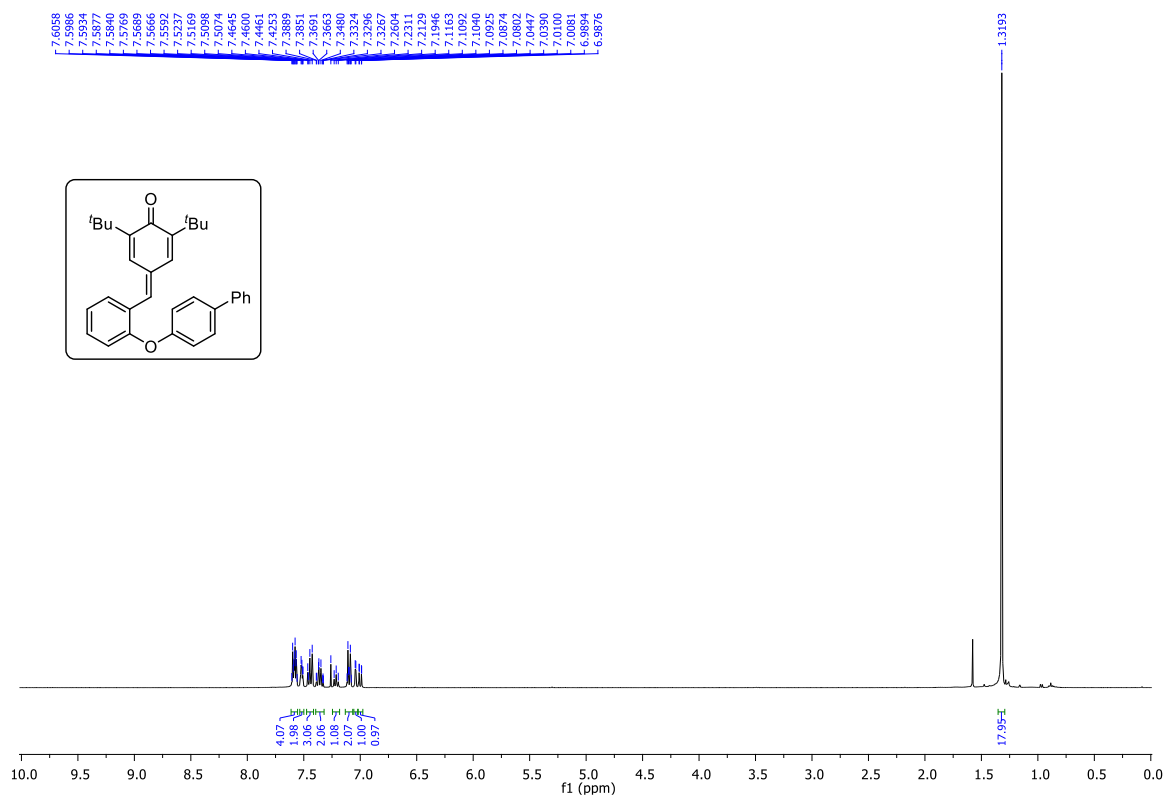

<sup>13</sup>C NMR (100 MHz, CDCl<sub>3</sub>) spectrum of **1p**

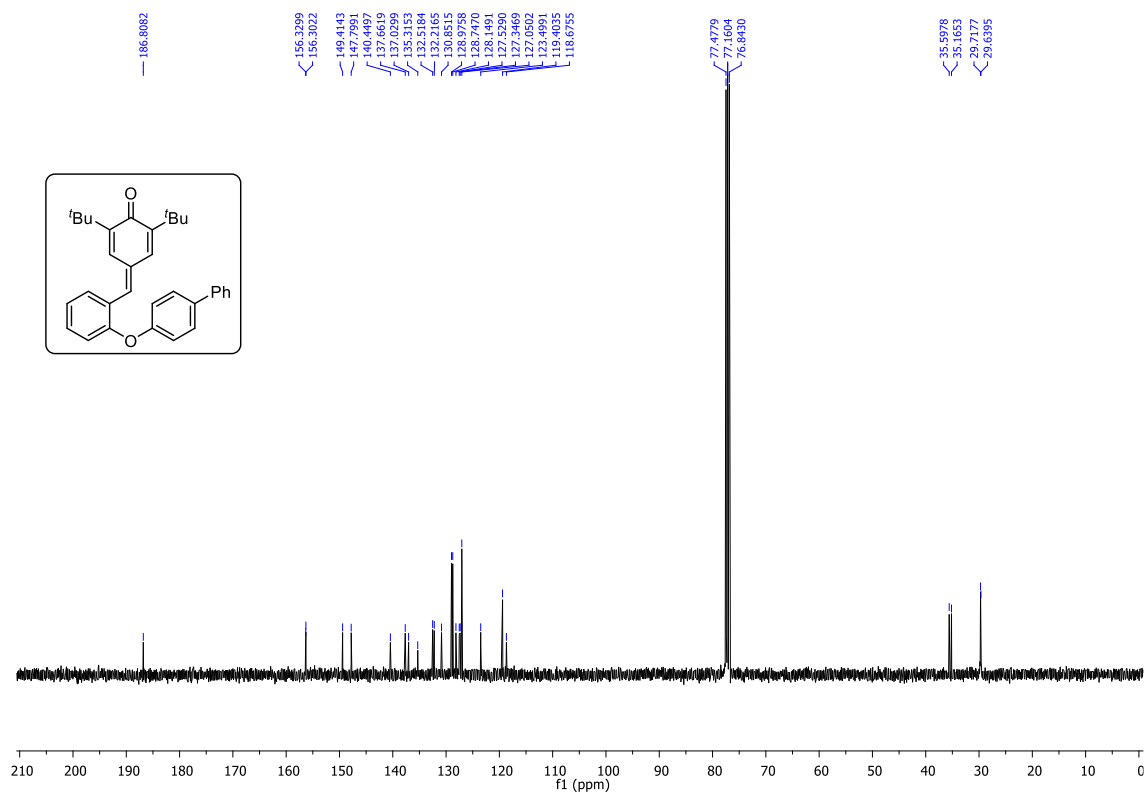

<sup>1</sup>H NMR (400 MHz, CDCl<sub>3</sub>) spectrum of **1q**

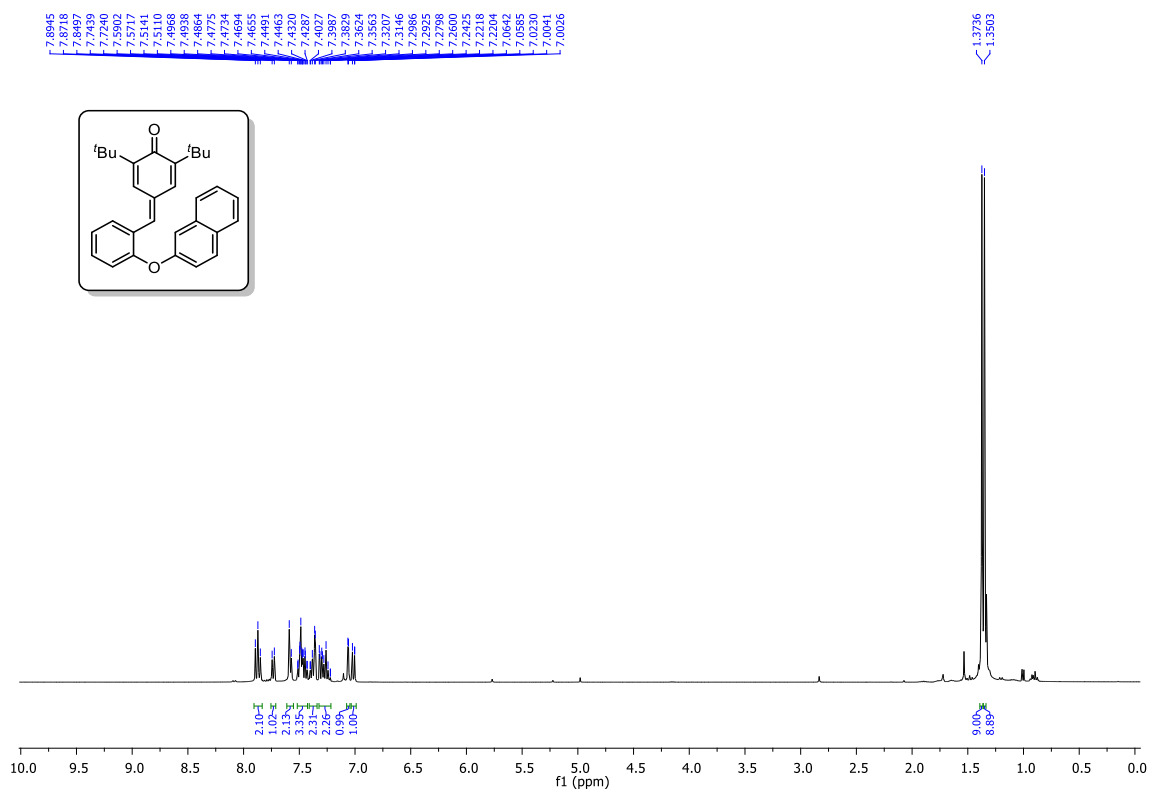

<sup>13</sup>C NMR (100 MHz, CDCl<sub>3</sub>) spectrum of **1q**

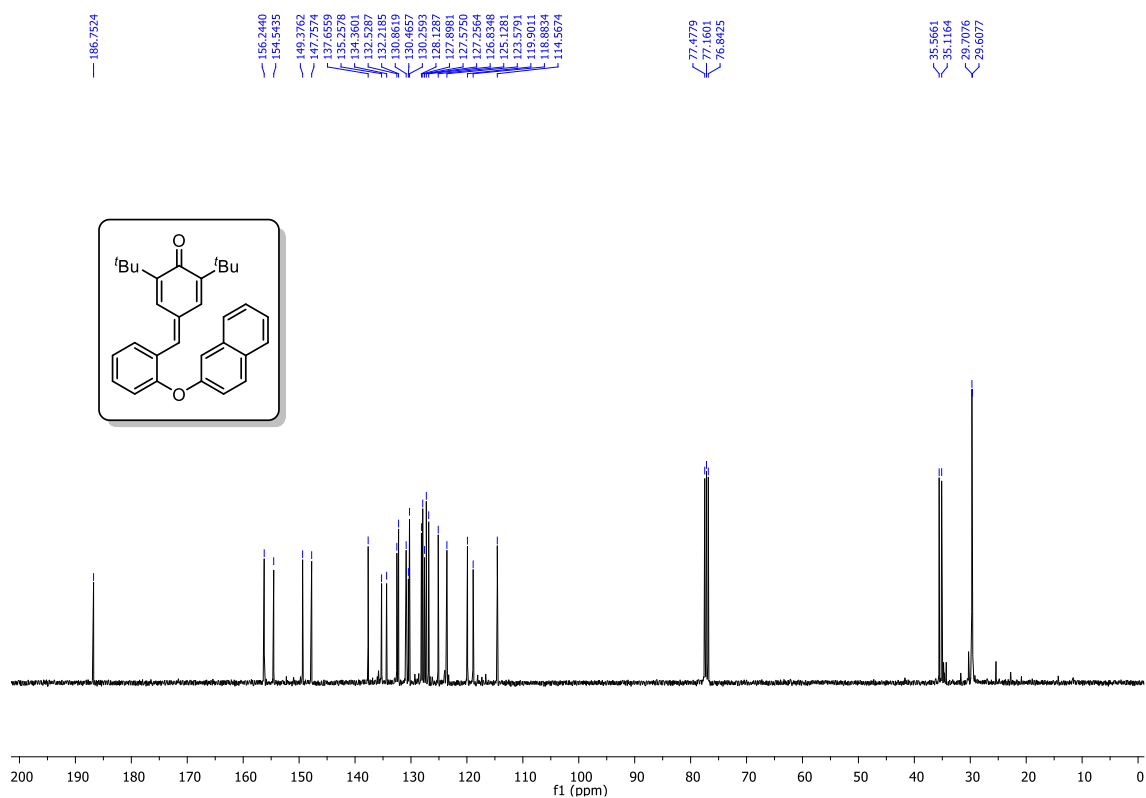

<sup>1</sup>H NMR (400 MHz, CDCl<sub>3</sub>) spectrum of **1r**

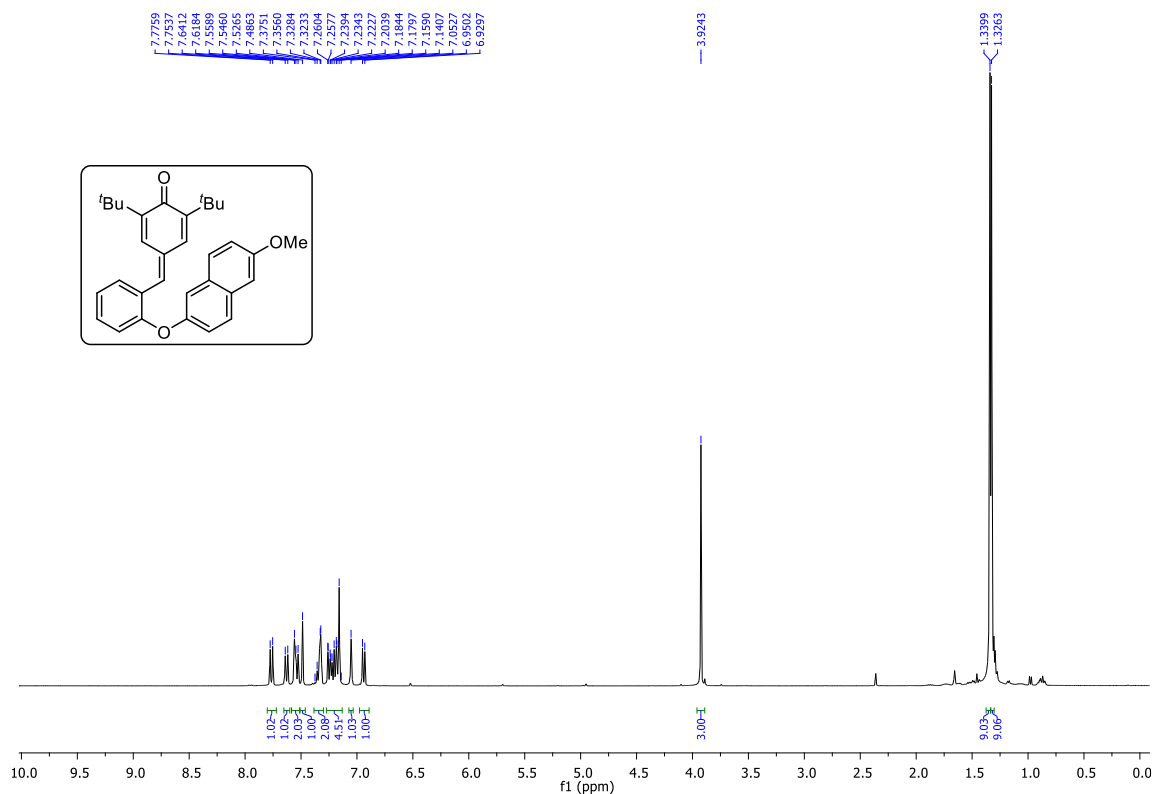

$^{13}\text{C}$  NMR (100 MHz,  $\text{CDCl}_3$ ) spectrum of **1r**

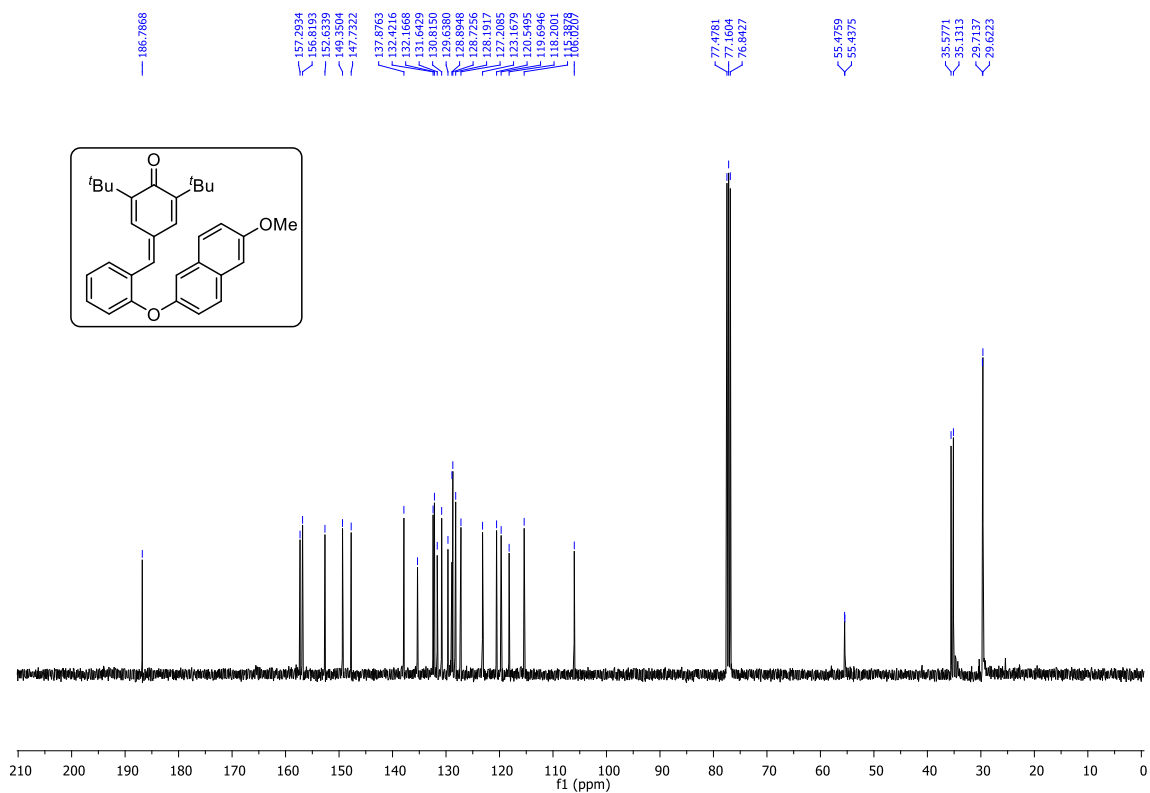

$^1\text{H}$  NMR (400 MHz,  $\text{CDCl}_3$ ) spectrum of **1s**

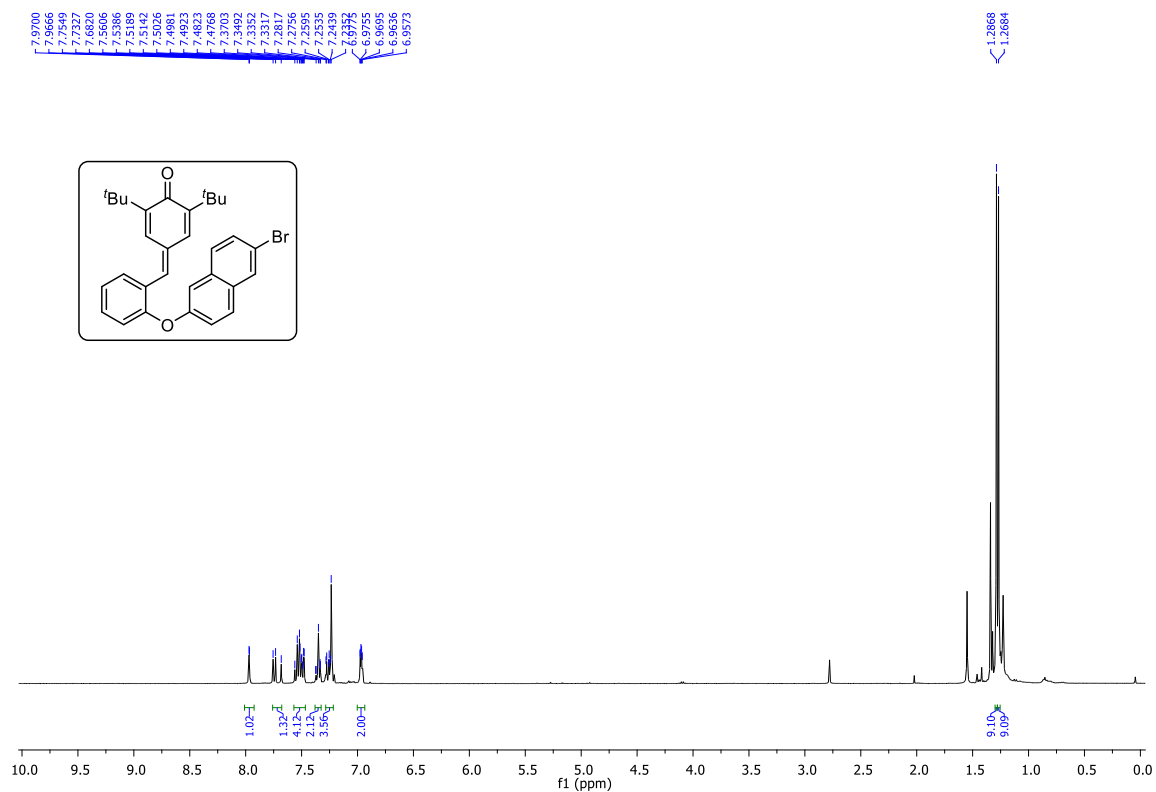

<sup>13</sup>C NMR (100 MHz, CDCl<sub>3</sub>) spectrum of **1s**

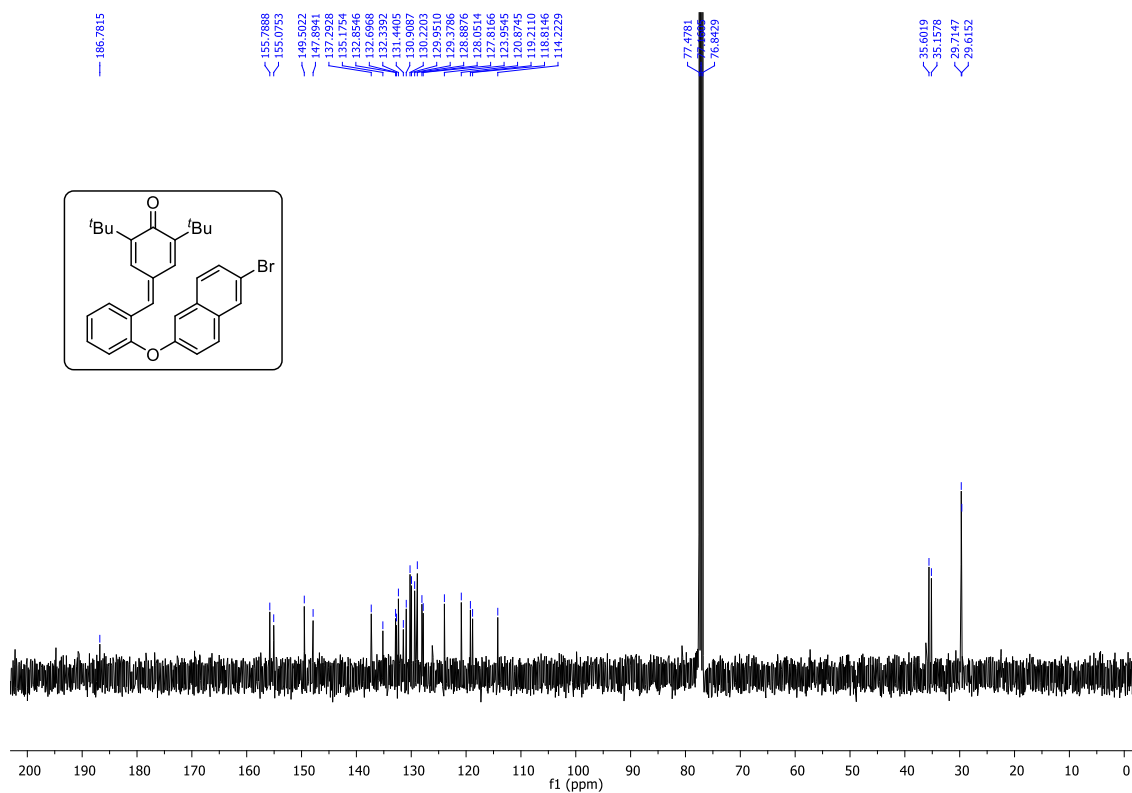

<sup>1</sup>H NMR (400 MHz, CDCl<sub>3</sub>) spectrum of **1t**

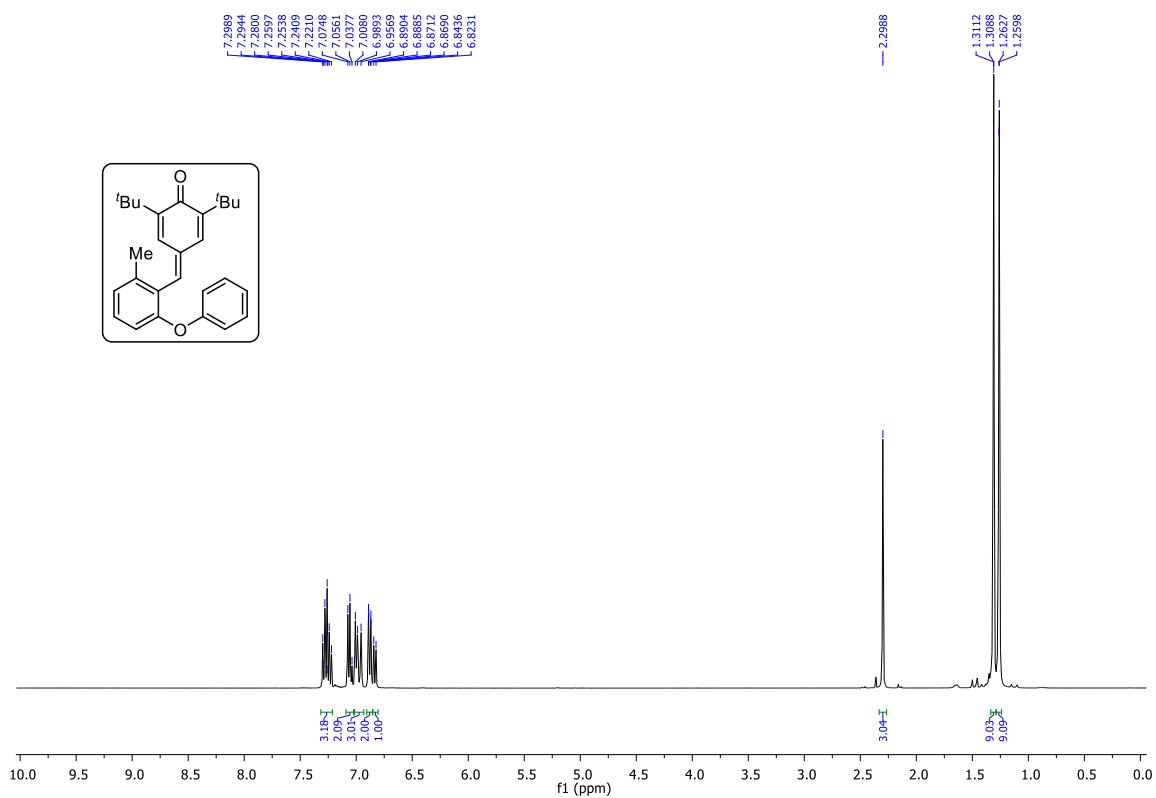



$^{13}\text{C}$  NMR (100 MHz,  $\text{CDCl}_3$ ) spectrum of **1t**

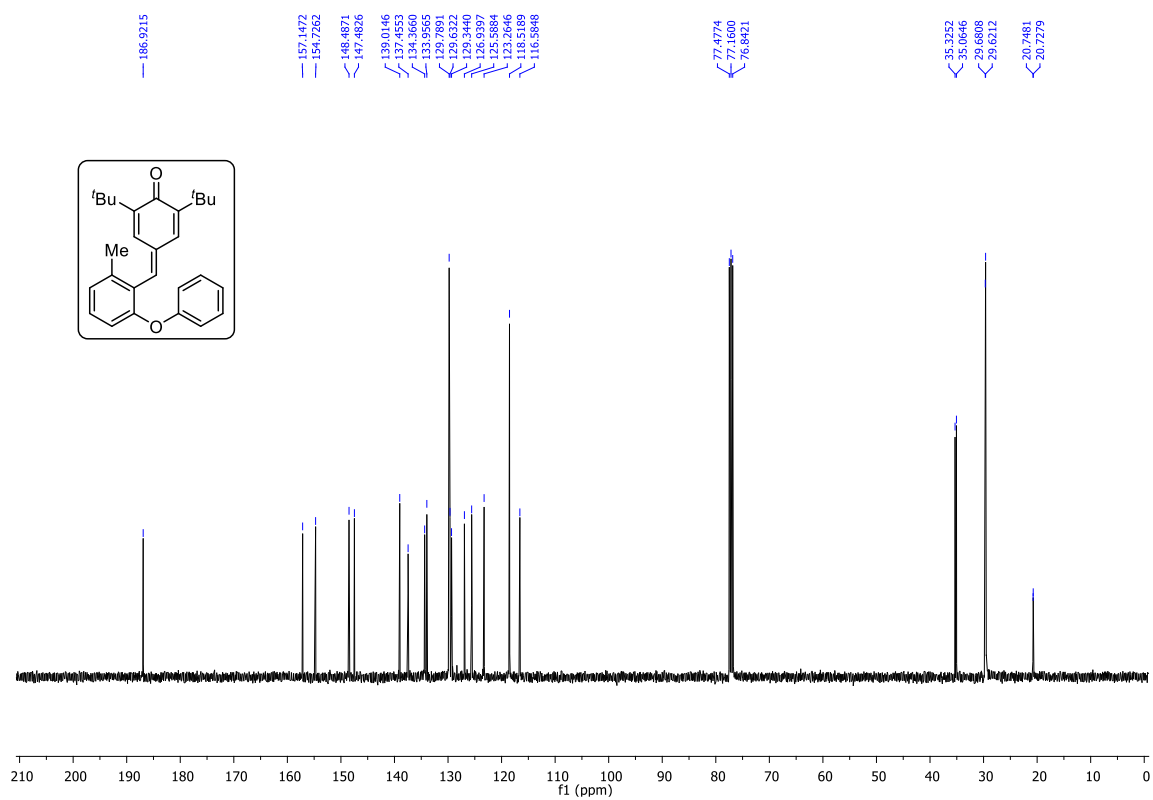

$^1\text{H}$  NMR (400 MHz,  $\text{CDCl}_3$ ) spectrum of **1u**

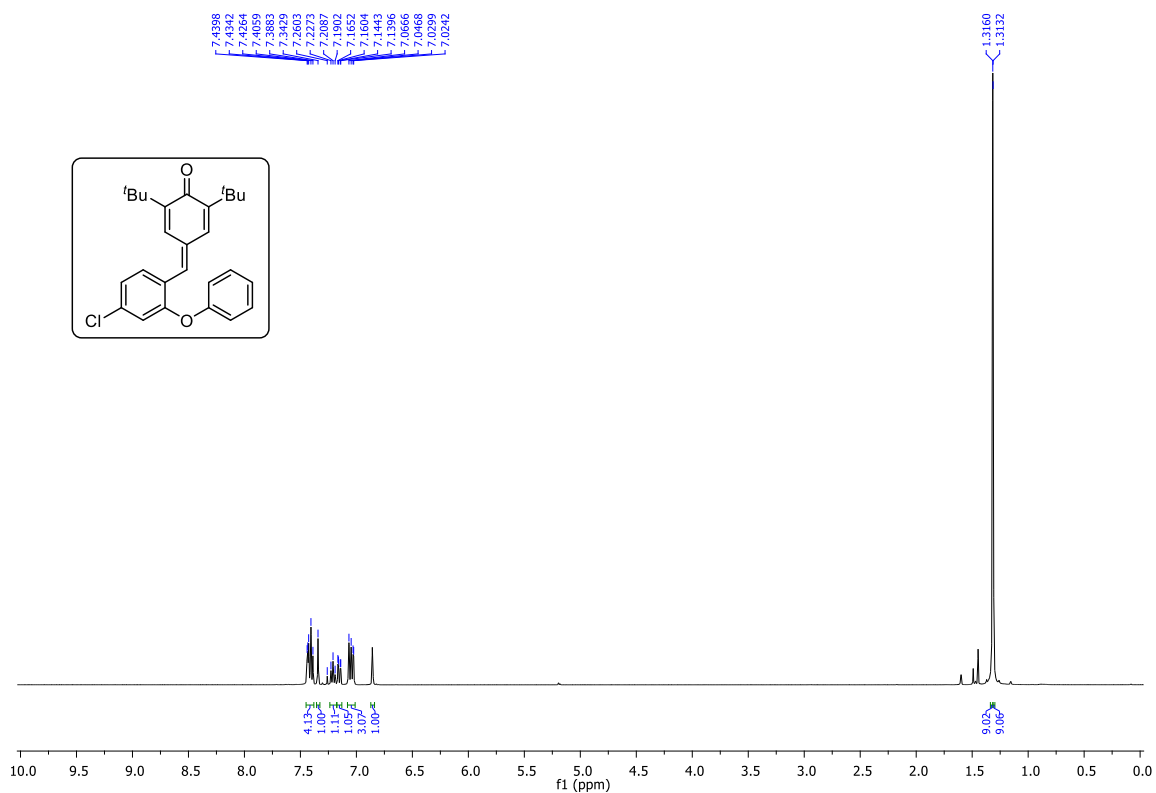

$^{13}\text{C}$  NMR (100 MHz,  $\text{CDCl}_3$ ) spectrum of **1u**

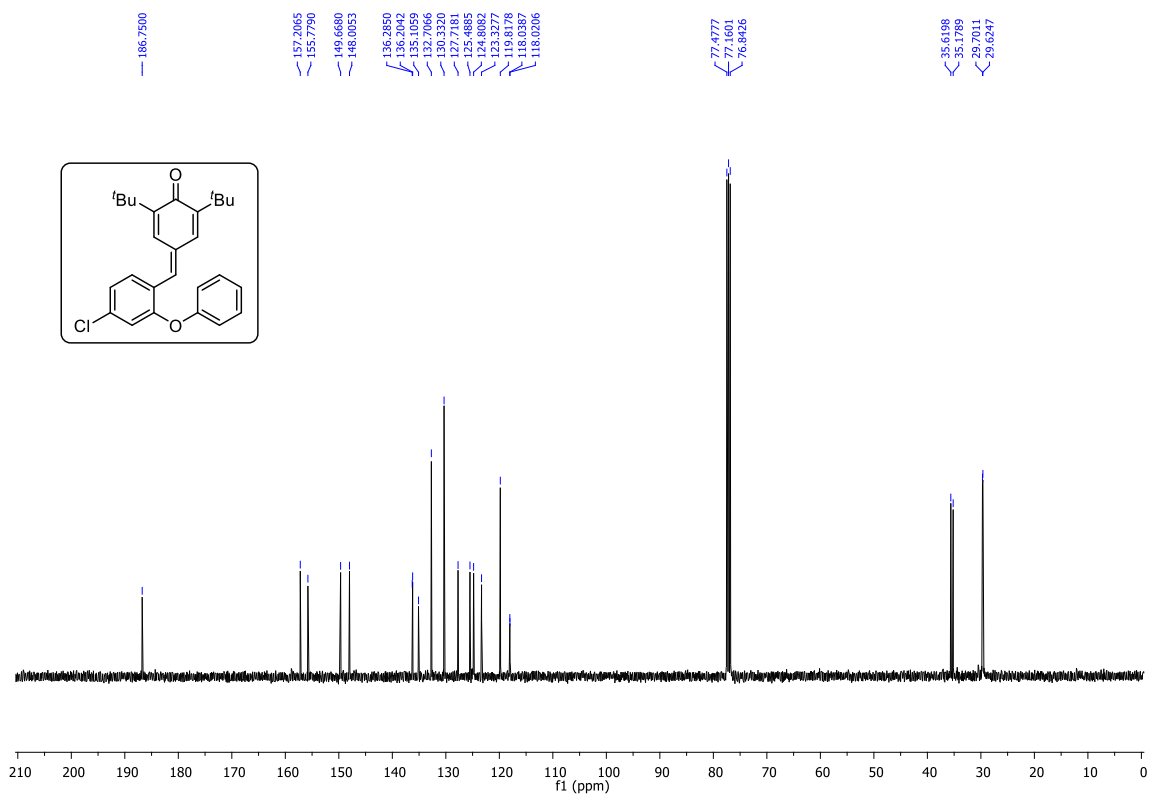

$^1\text{H}$  NMR (400 MHz,  $\text{CDCl}_3$ ) spectrum of **3a**

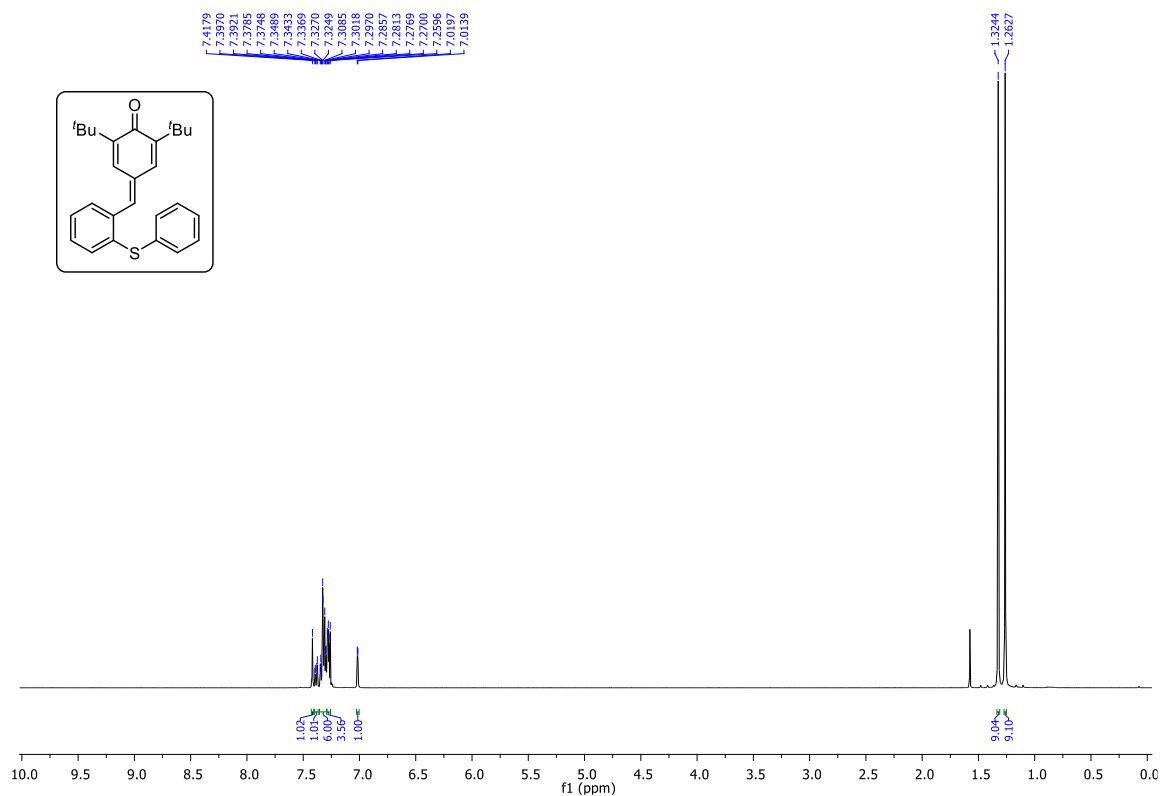

<sup>13</sup>C NMR (100 MHz, CDCl<sub>3</sub>) spectrum of **3a**

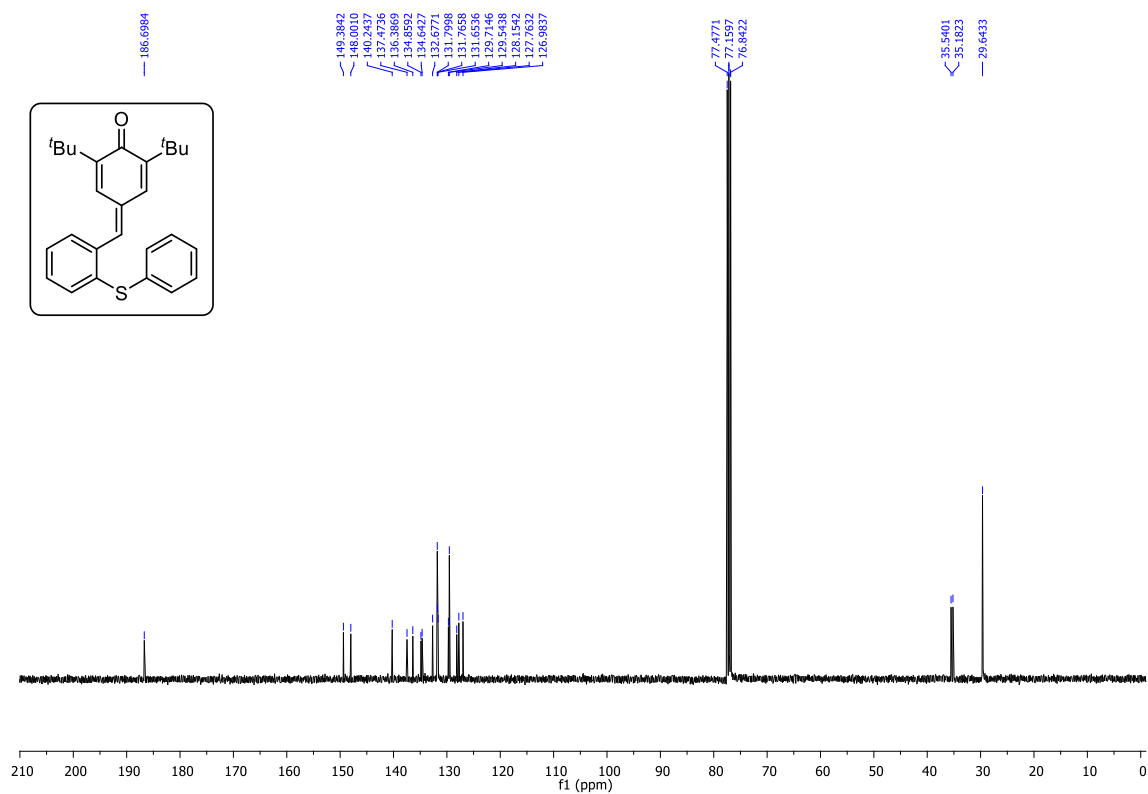

<sup>1</sup>H NMR (400 MHz, CDCl<sub>3</sub>) spectrum of **3b**

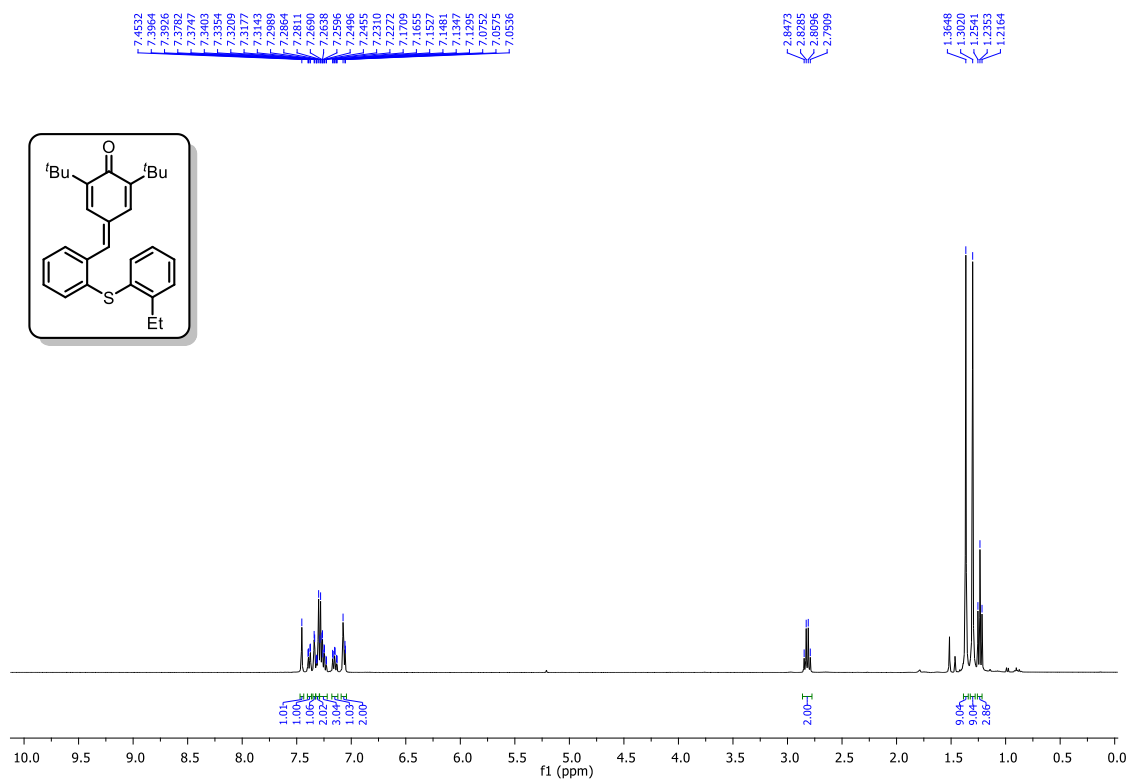

<sup>13</sup>C NMR (100 MHz, CDCl<sub>3</sub>) spectrum of **3b**

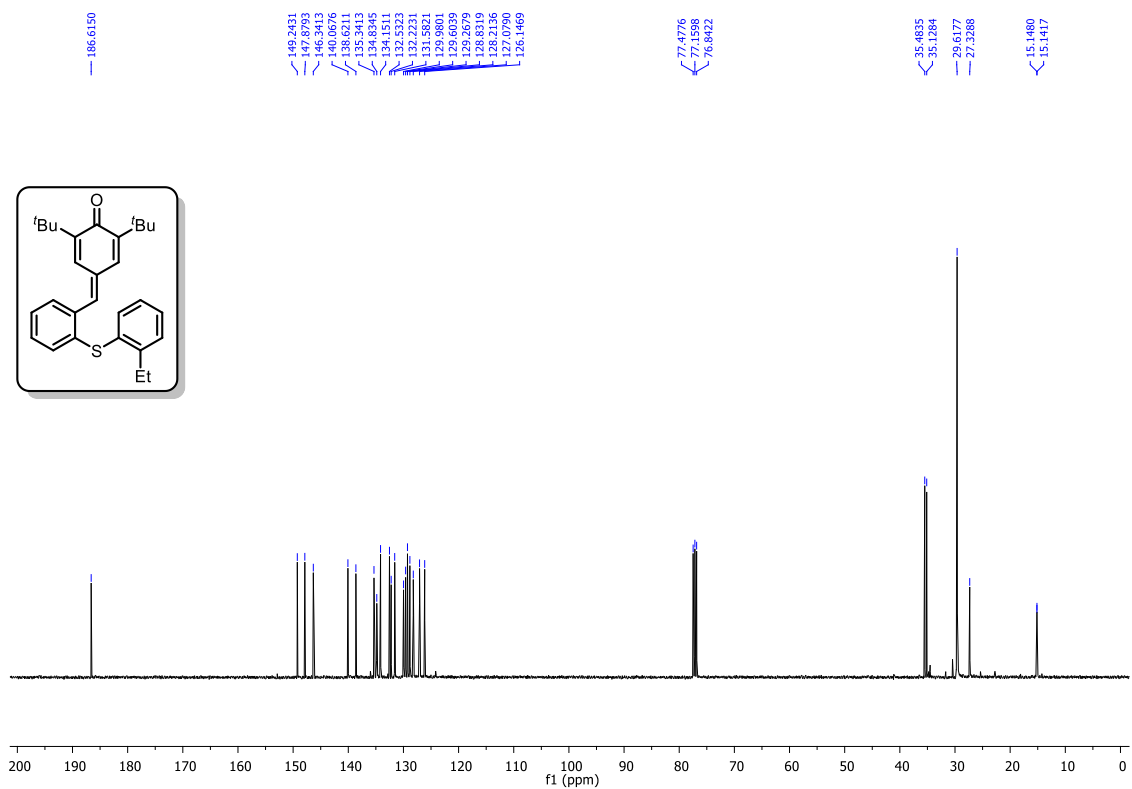

<sup>1</sup>H NMR (400 MHz, CDCl<sub>3</sub>) spectrum of **3c**

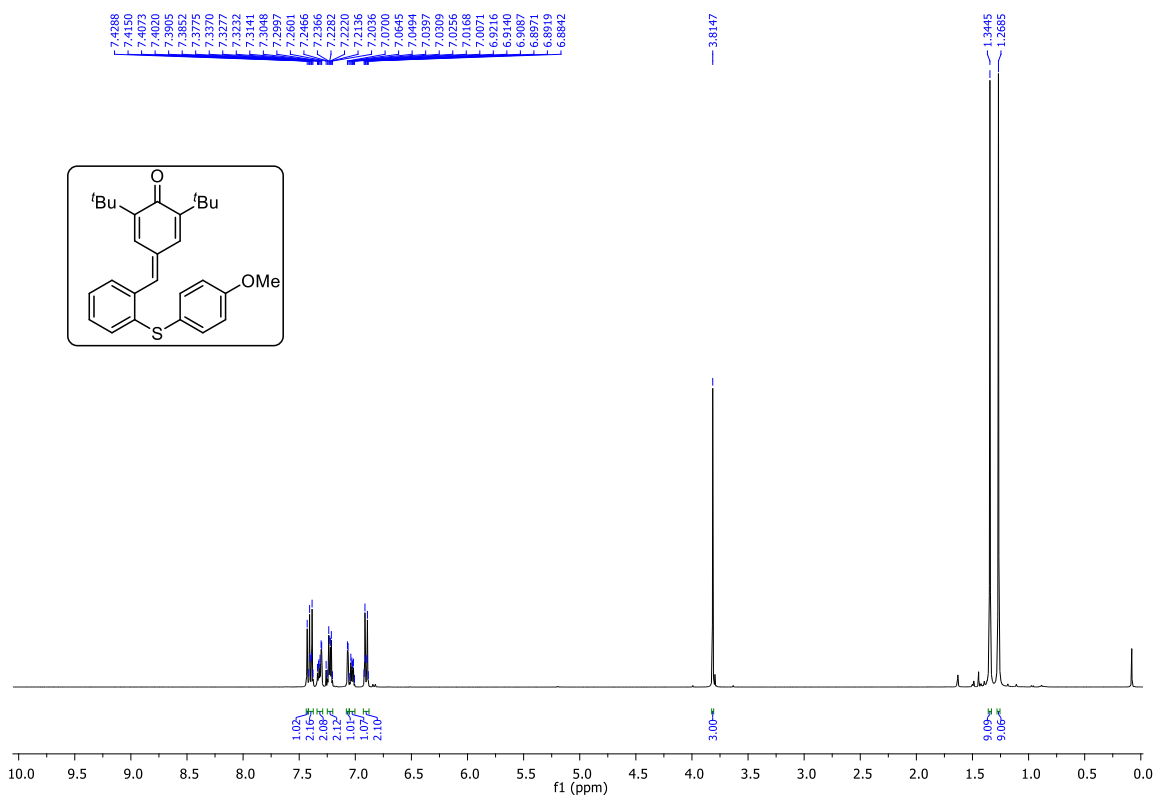

$^{13}\text{C}$  NMR (100 MHz,  $\text{CDCl}_3$ ) spectrum of **3c**

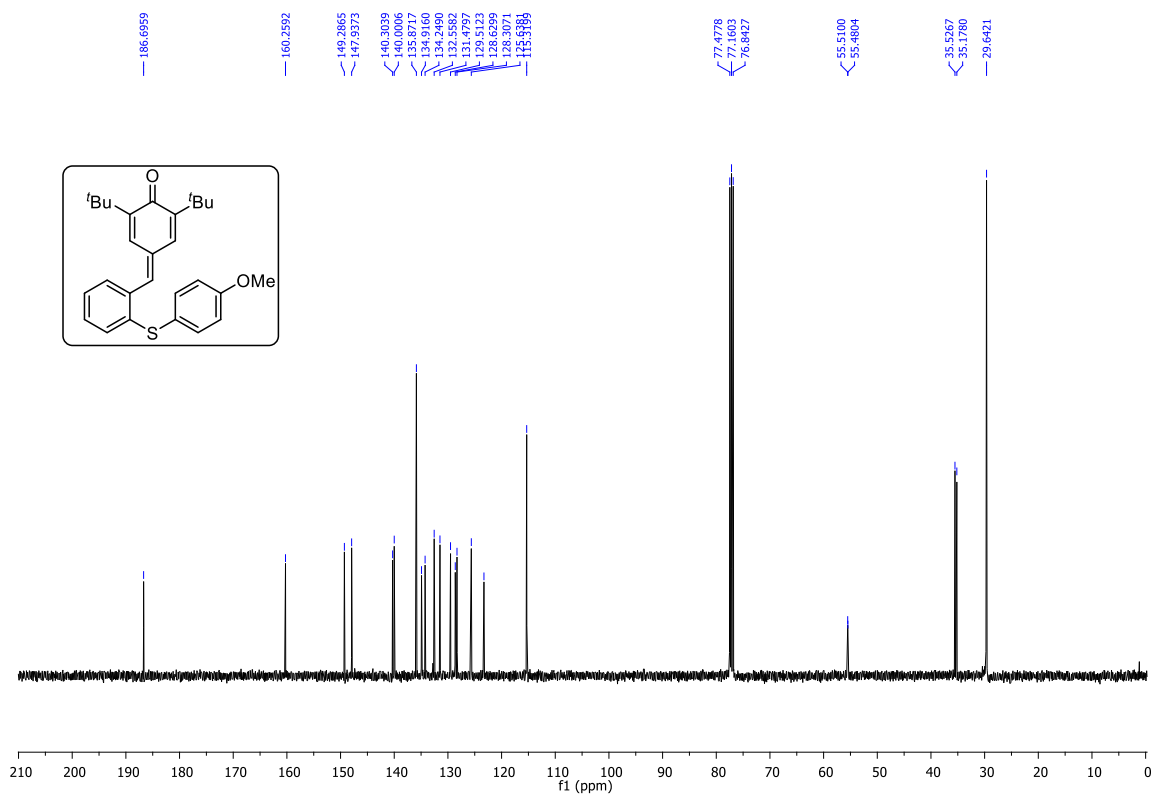

$^1\text{H}$  NMR (400 MHz,  $\text{CDCl}_3$ ) spectrum of **3d**

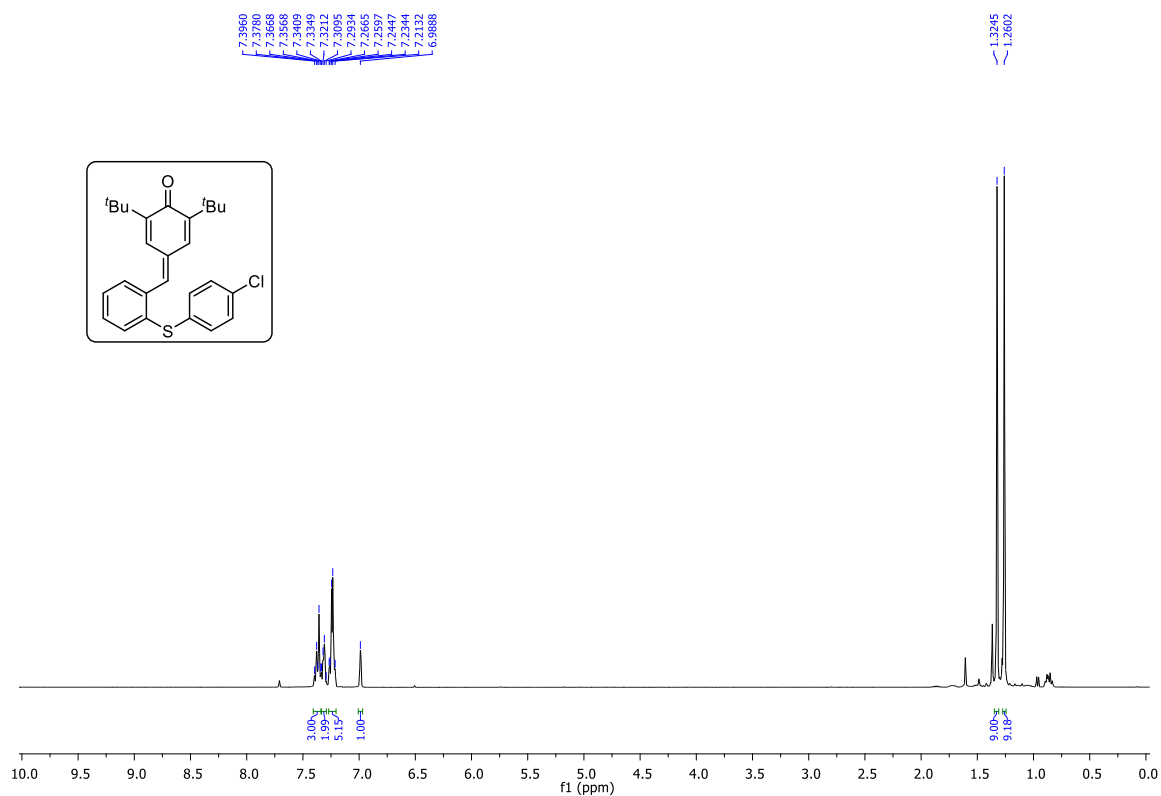

$^{13}\text{C}$  NMR (100 MHz,  $\text{CDCl}_3$ ) spectrum of **3d**

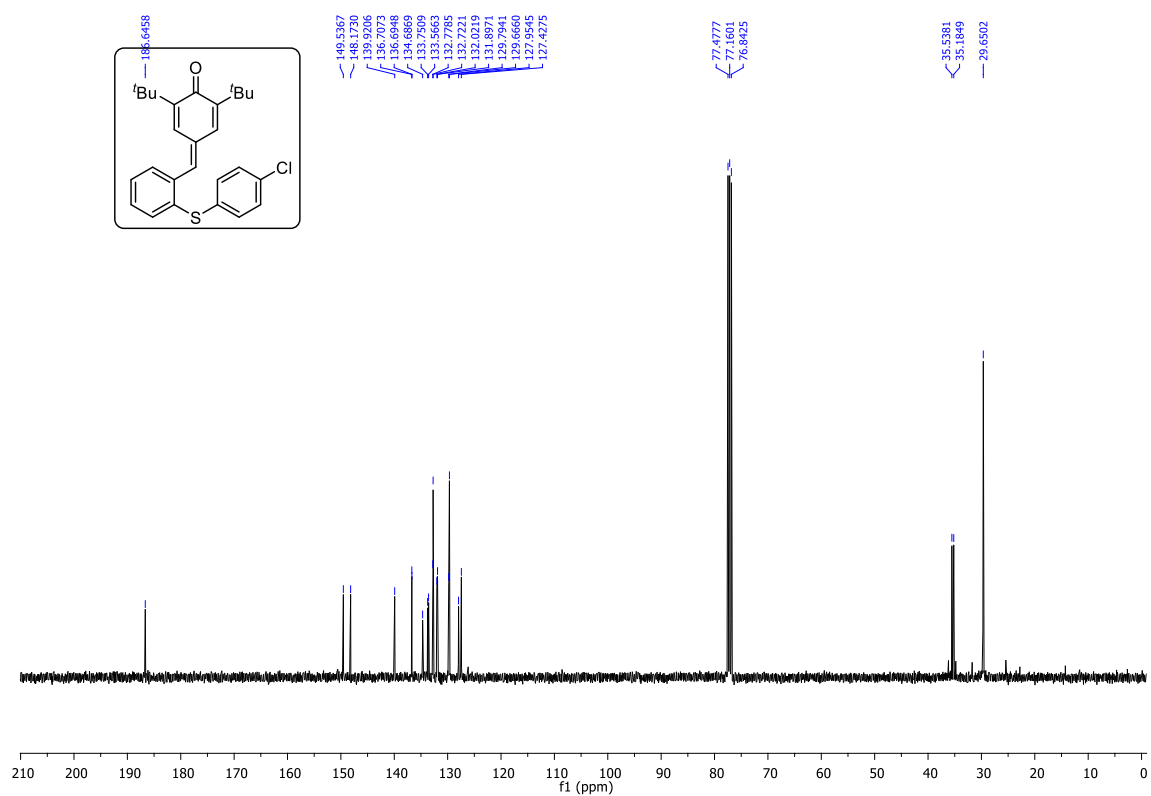

$^1\text{H}$  NMR (400 MHz,  $\text{CDCl}_3$ ) spectrum of **3e**

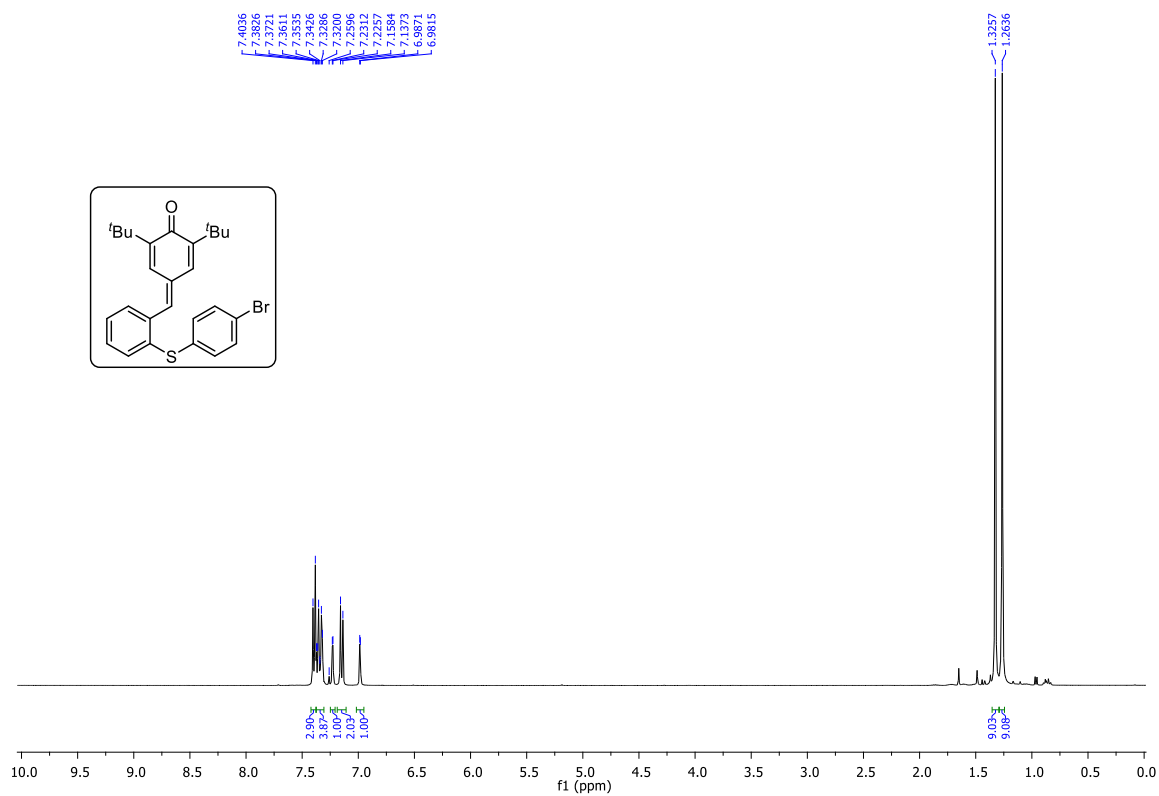

<sup>13</sup>C NMR (100 MHz, CDCl<sub>3</sub>) spectrum of **3e**

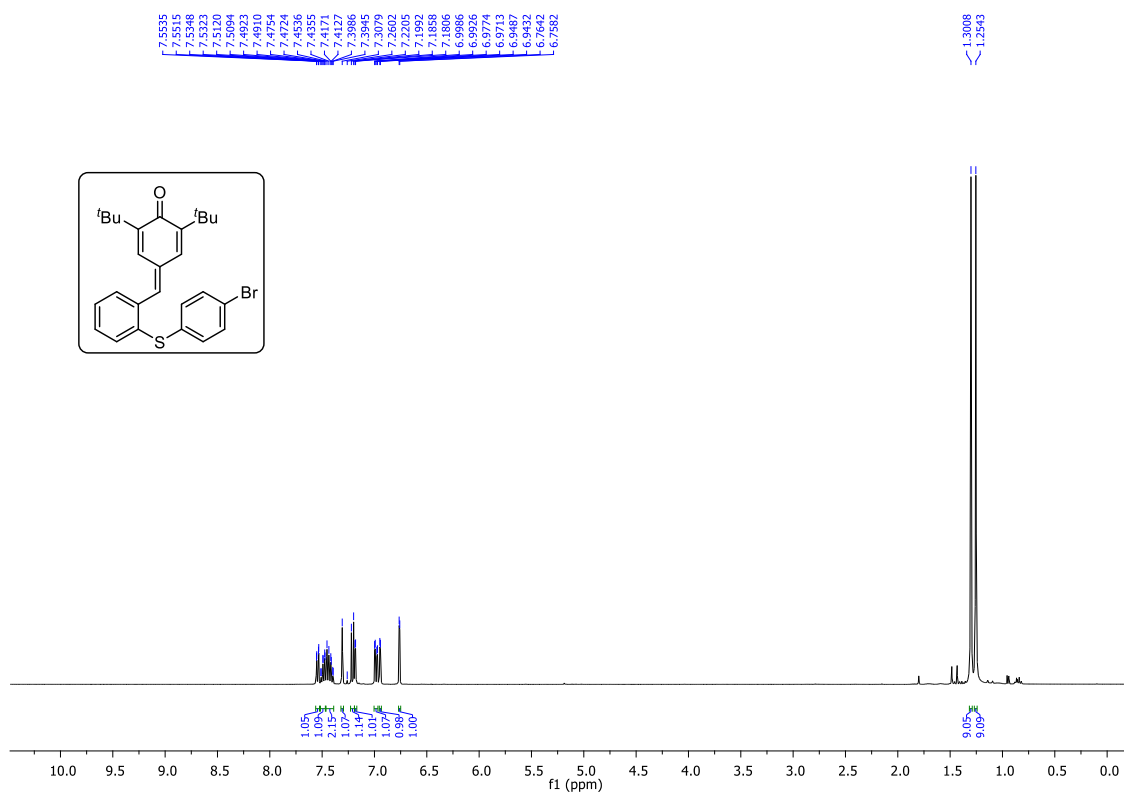

<sup>1</sup>H NMR (400 MHz, CDCl<sub>3</sub>) spectrum of **3f**

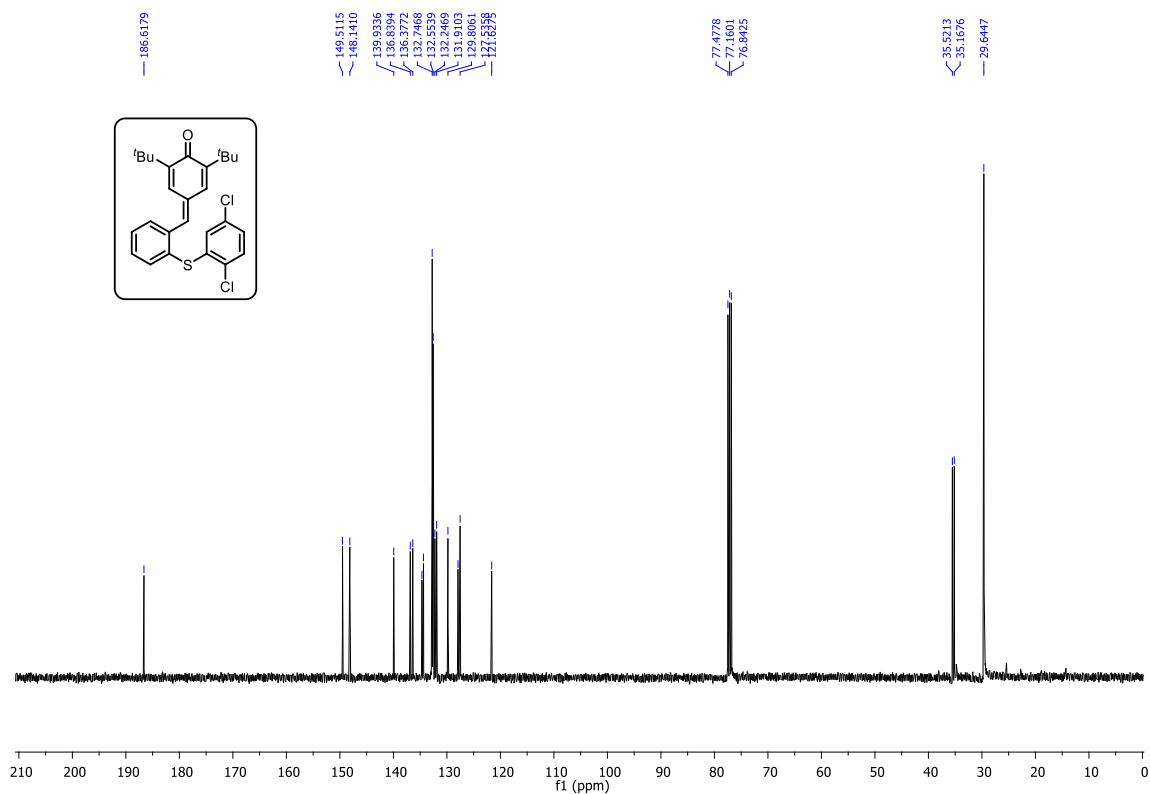

<sup>13</sup>C NMR (100 MHz, CDCl<sub>3</sub>) spectrum of **3f**

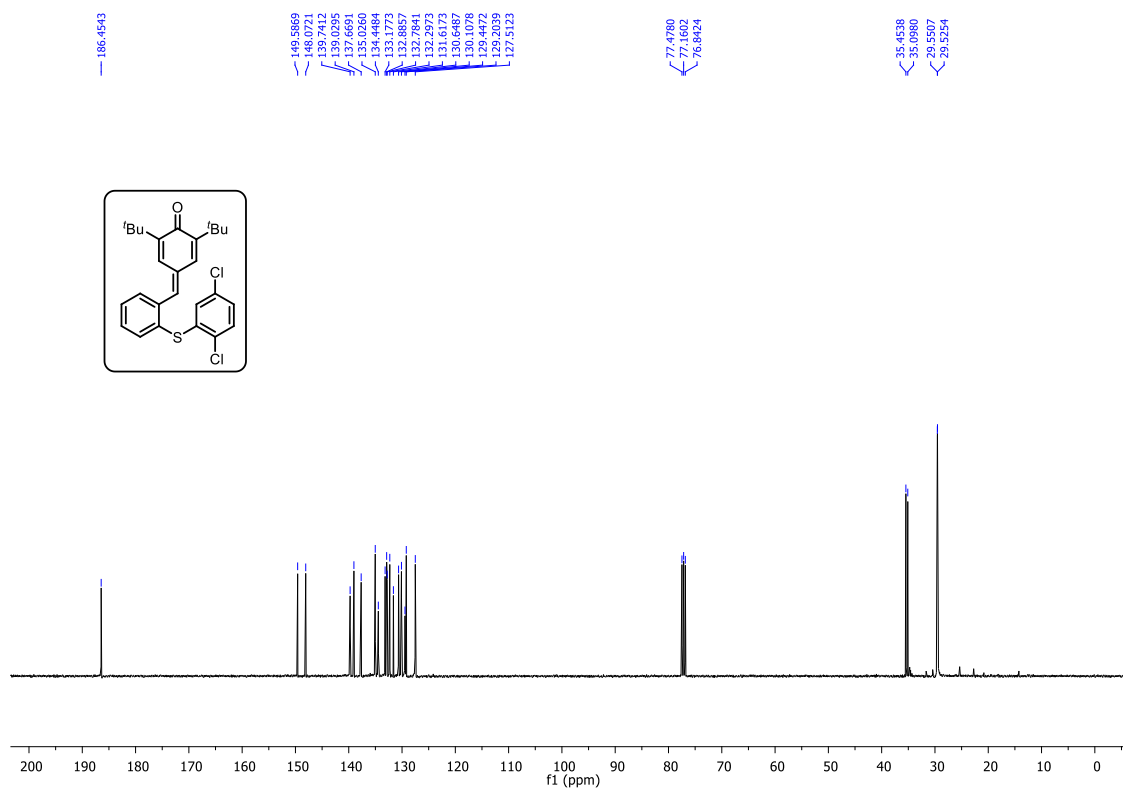

<sup>1</sup>H NMR (400 MHz, CDCl<sub>3</sub>) spectrum of **3g**

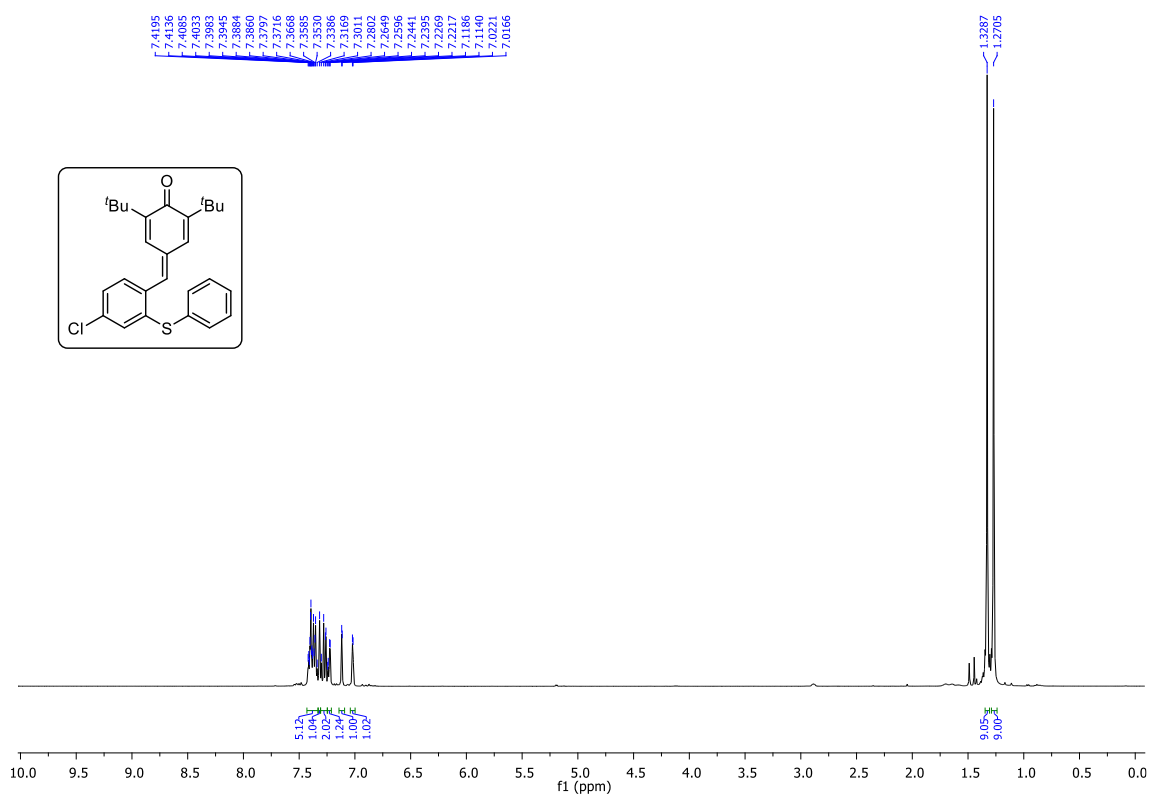



$^{13}\text{C}$  NMR (100 MHz,  $\text{CDCl}_3$ ) spectrum of **3g**

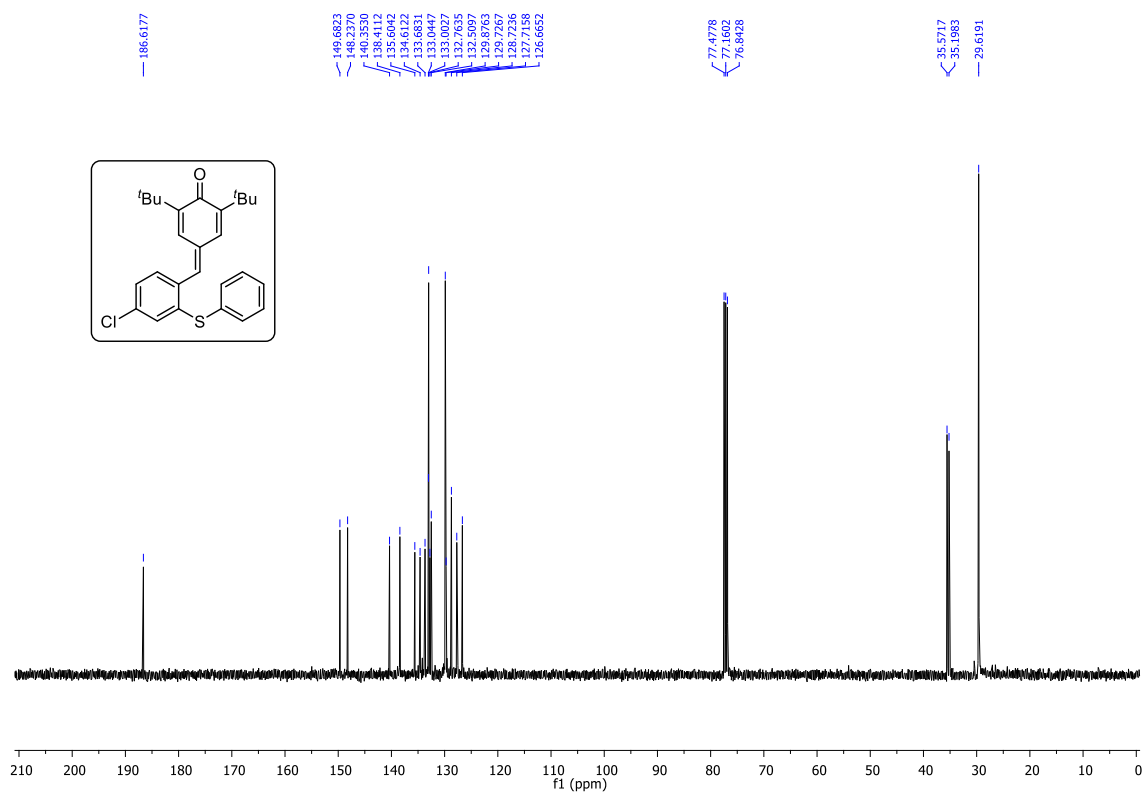

$^1\text{H}$  NMR (400 MHz,  $\text{CDCl}_3$ ) spectrum of **3h**

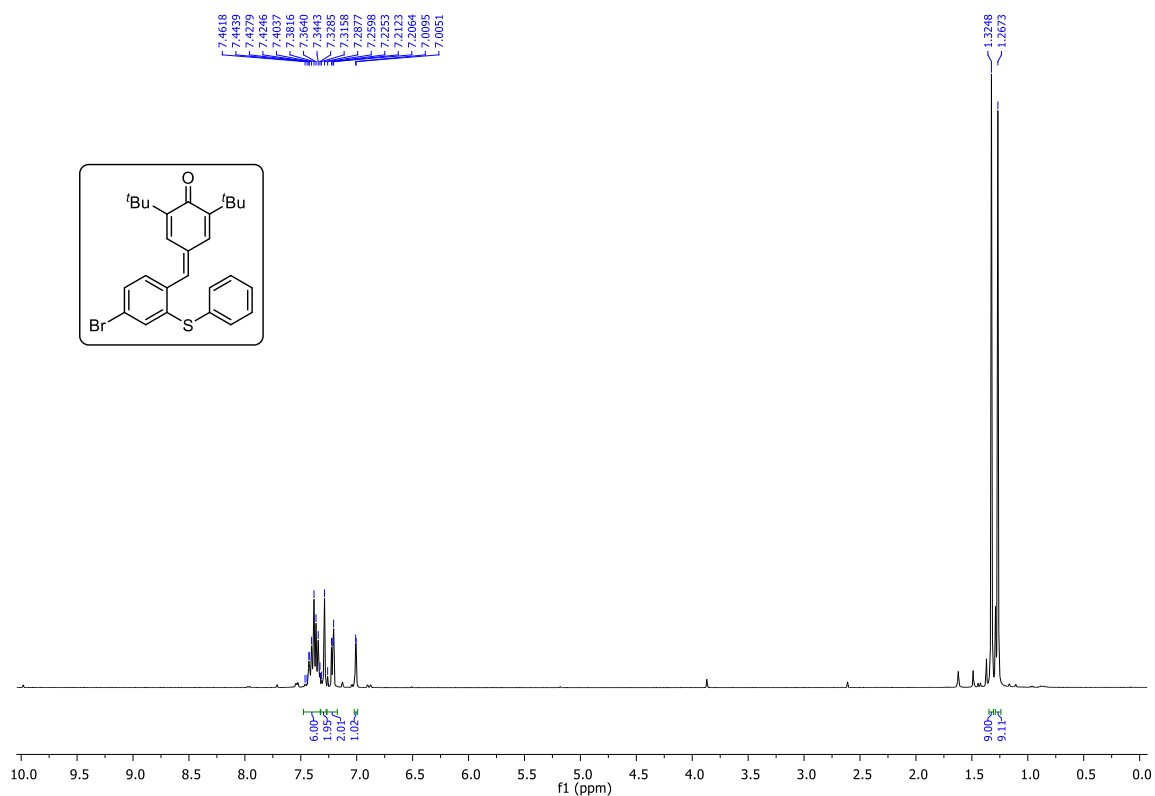

<sup>13</sup>C NMR (100 MHz, CDCl<sub>3</sub>) spectrum of **3h**

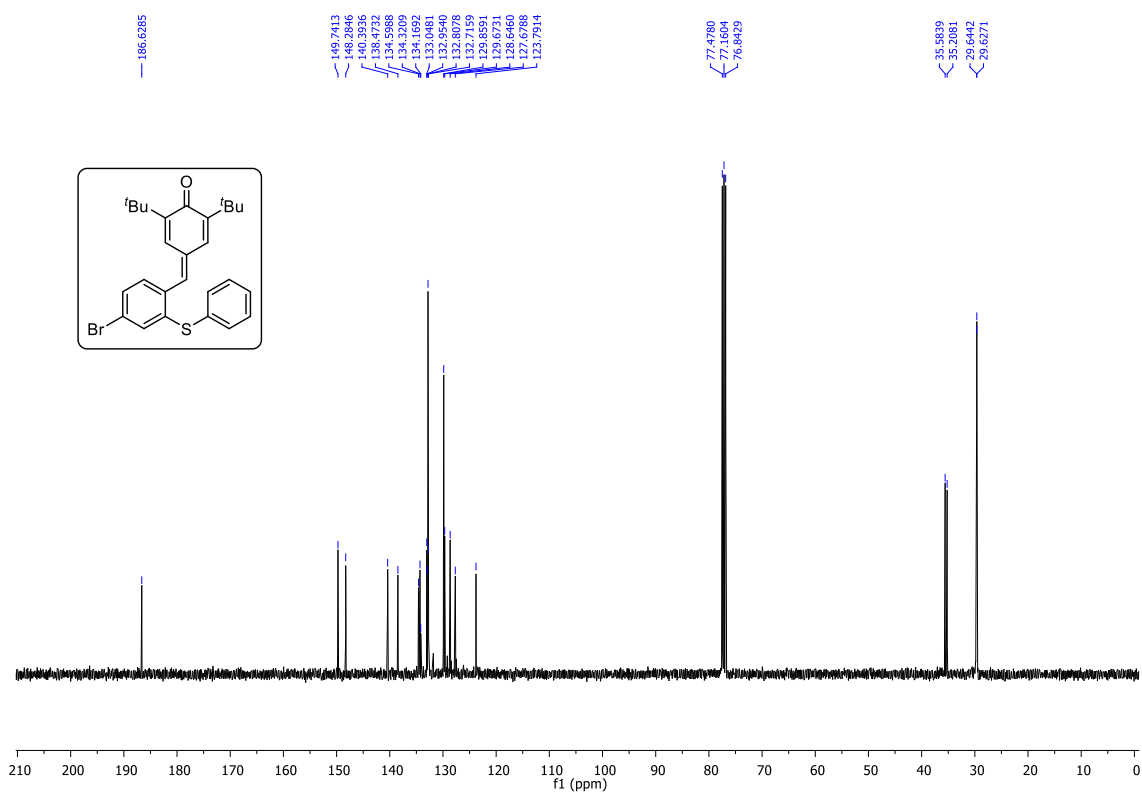

<sup>1</sup>H NMR (400 MHz, CDCl<sub>3</sub>) spectrum of **3i**

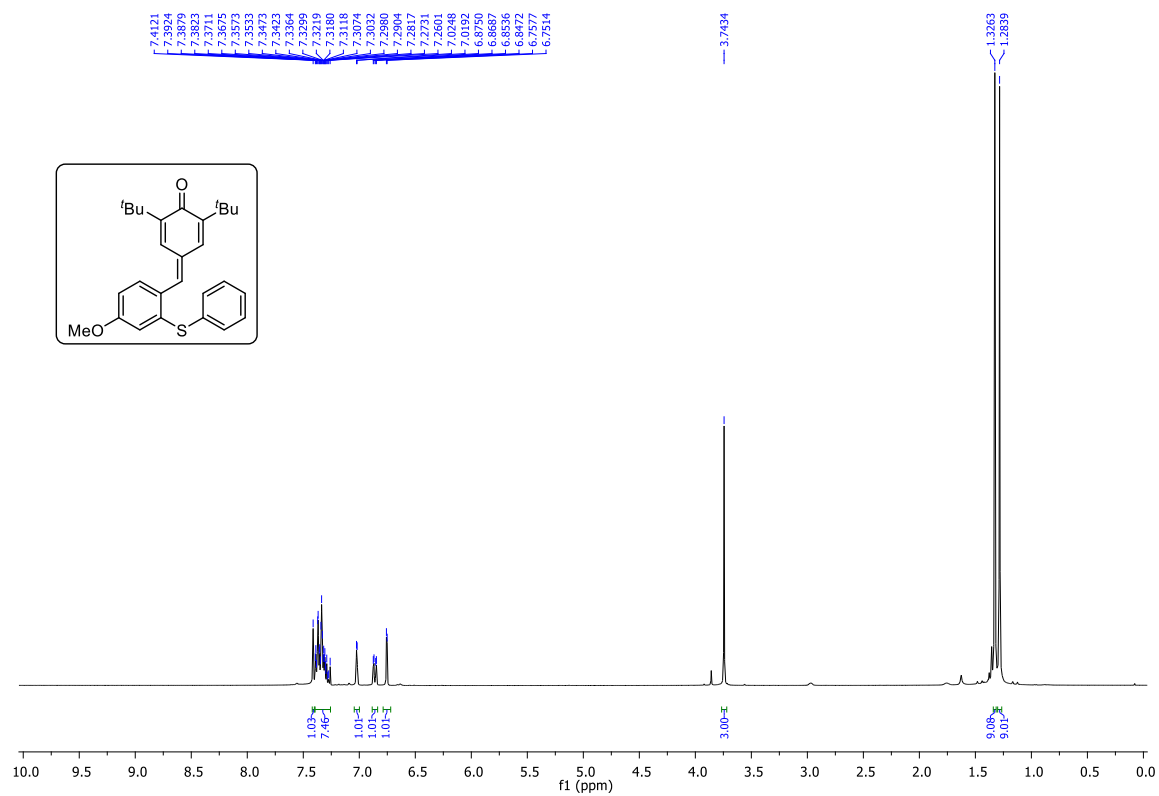

$^{13}\text{C}$  NMR (100 MHz,  $\text{CDCl}_3$ ) spectrum of **3i**

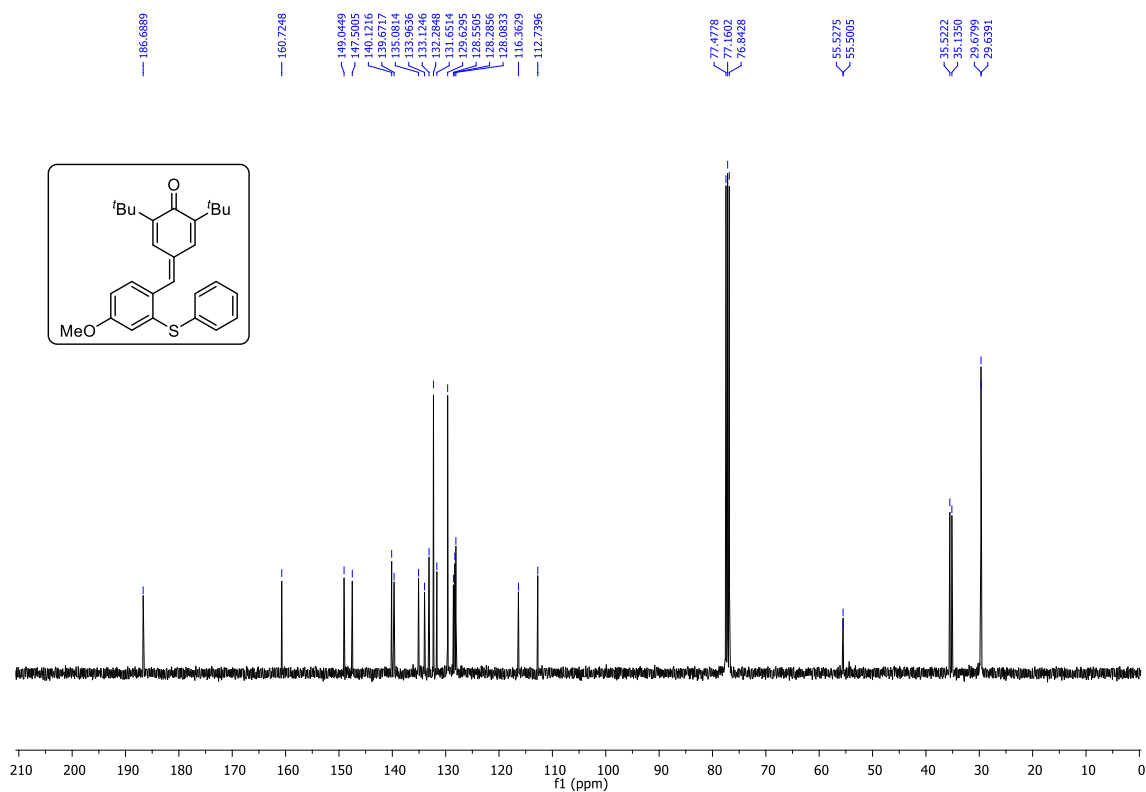

$^1\text{H}$  NMR (400 MHz,  $\text{CDCl}_3$ ) spectrum of **3j**

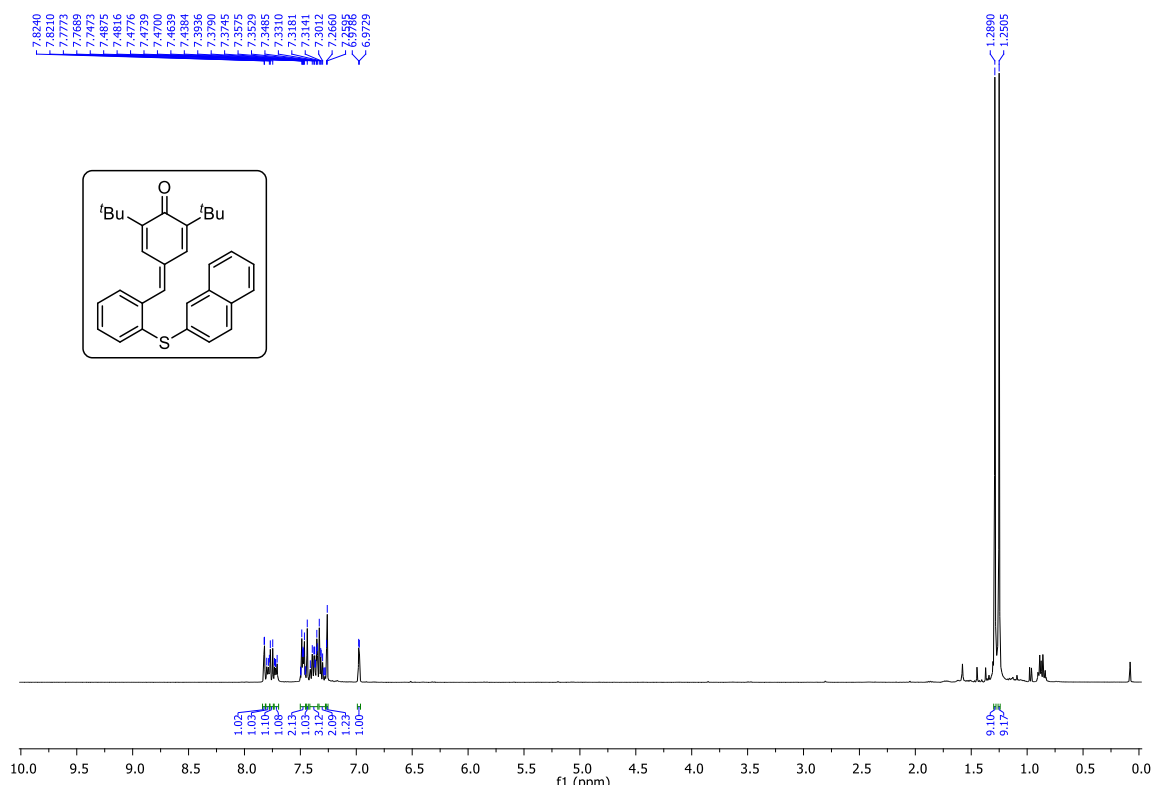

$^{13}\text{C}$  NMR (100 MHz,  $\text{CDCl}_3$ ) spectrum of **3j**

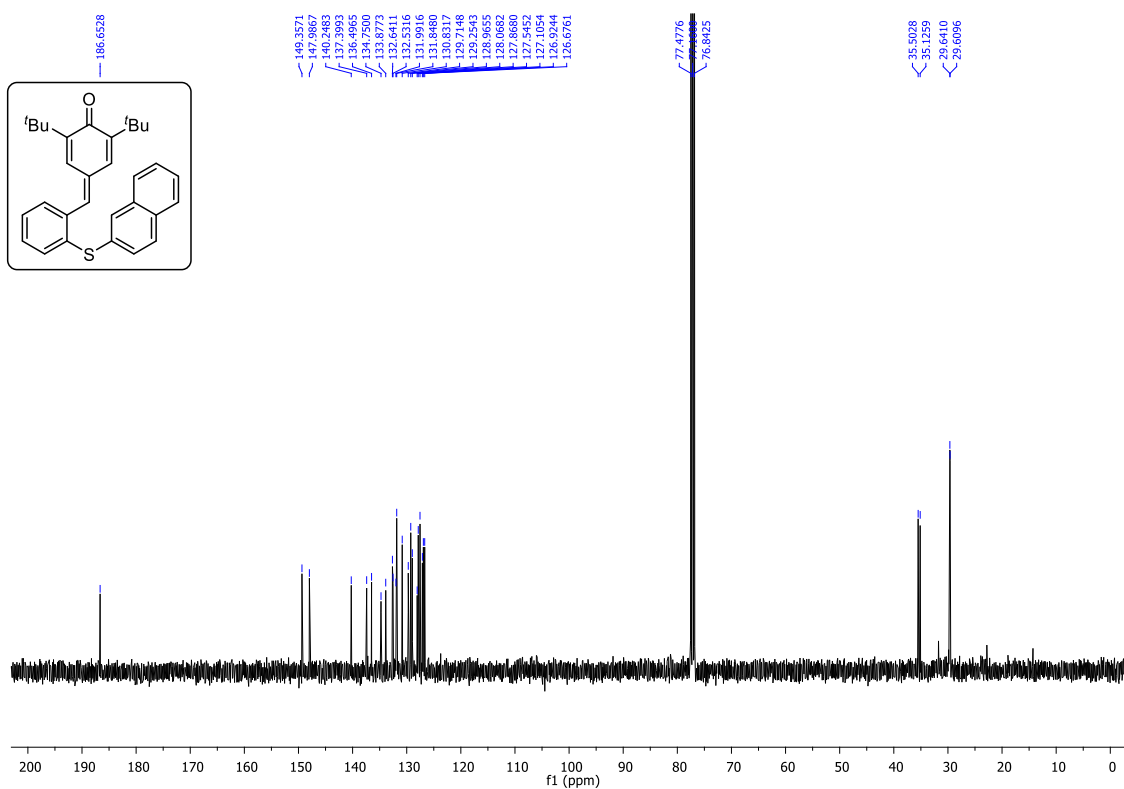

$^1\text{H}$  NMR (400 MHz,  $\text{CDCl}_3$ ) spectrum of **5a**

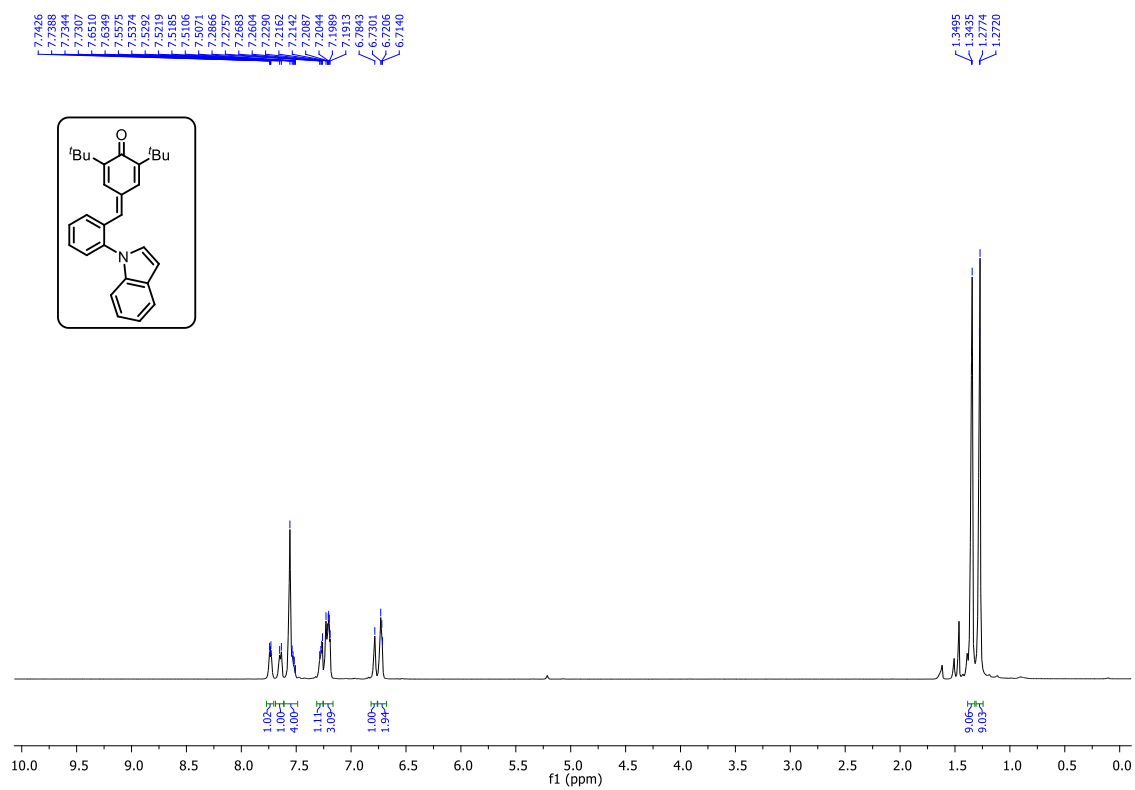

<sup>13</sup>C NMR (100 MHz, CDCl<sub>3</sub>) spectrum of 5a

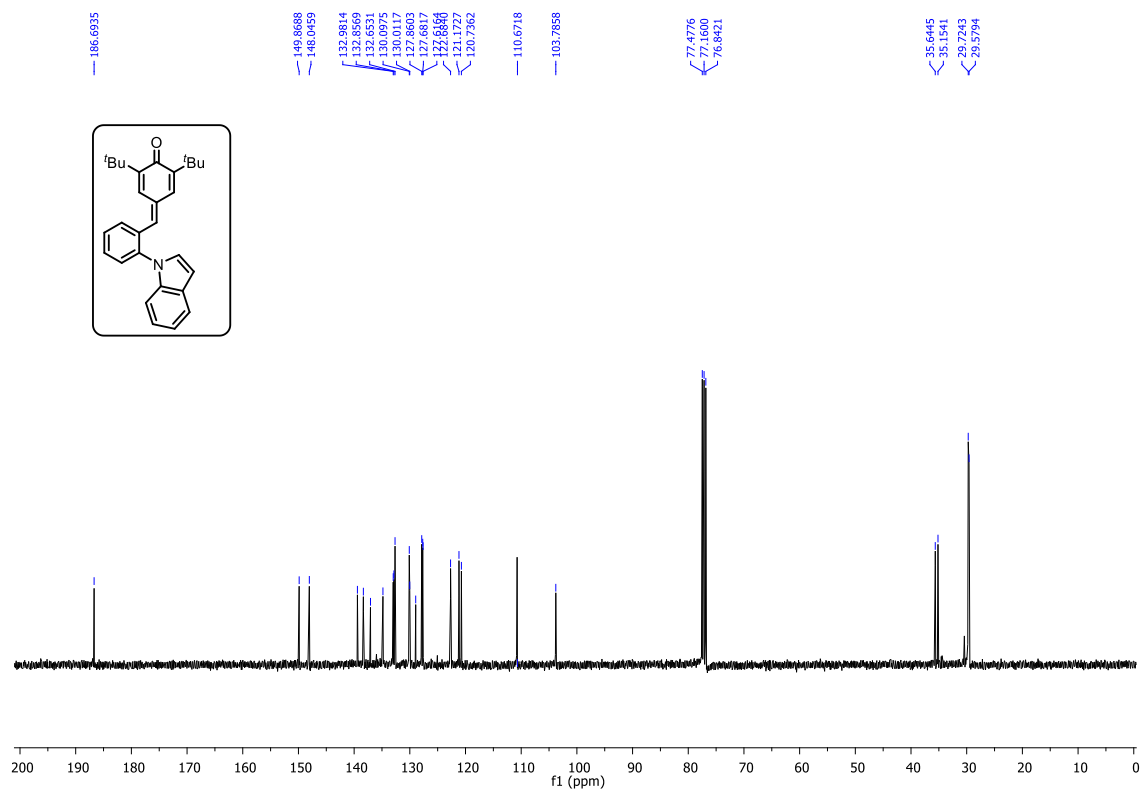

<sup>1</sup>H NMR (400 MHz, CDCl<sub>3</sub>) spectrum of 5b

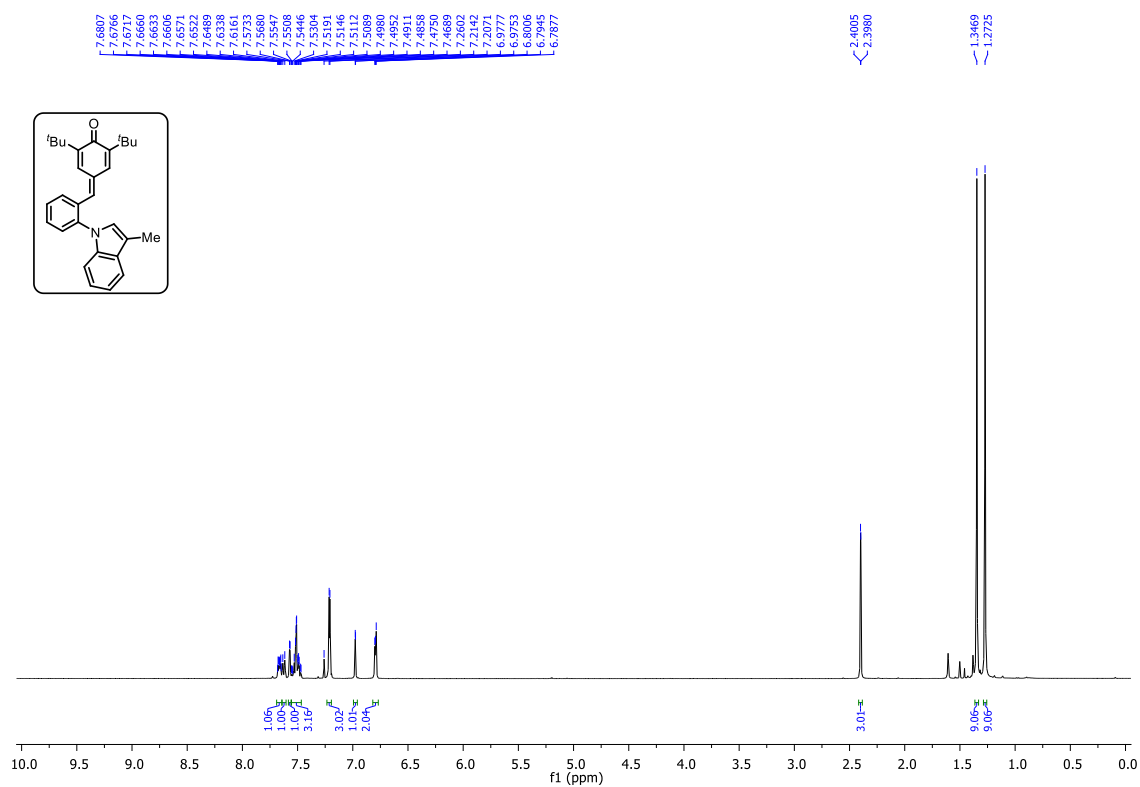

$^{13}\text{C}$  NMR (100 MHz,  $\text{CDCl}_3$ ) spectrum of **5b**

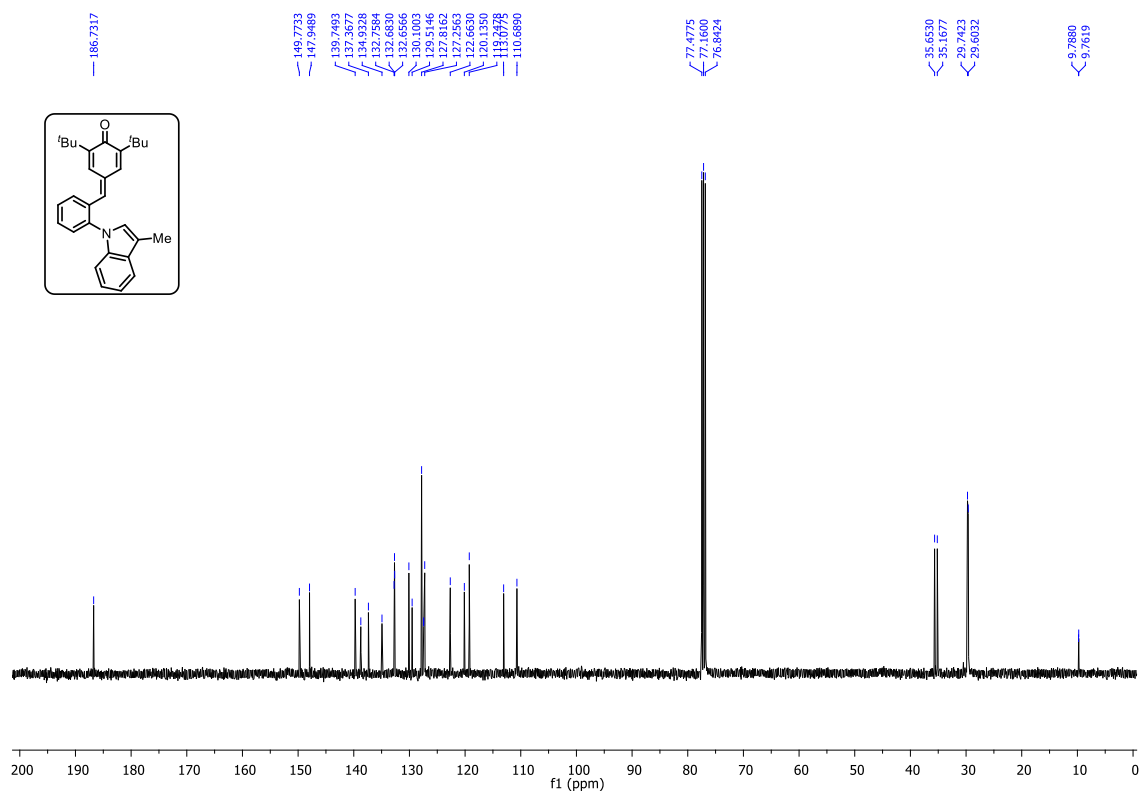

$^1\text{H}$  NMR (400 MHz,  $\text{DMSO}-d_6$ ) spectrum of **5c**

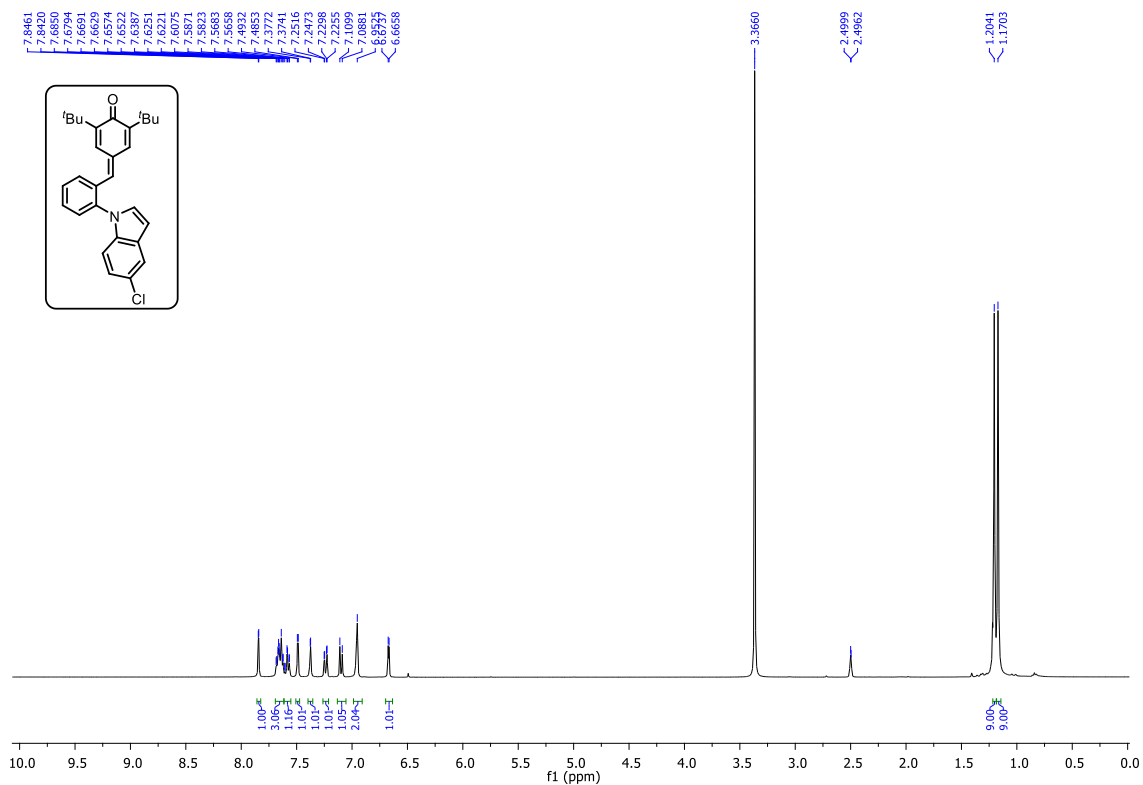

$^{13}\text{C}$  NMR (100 MHz,  $\text{DMSO-}d_6$ ) spectrum of **5c**

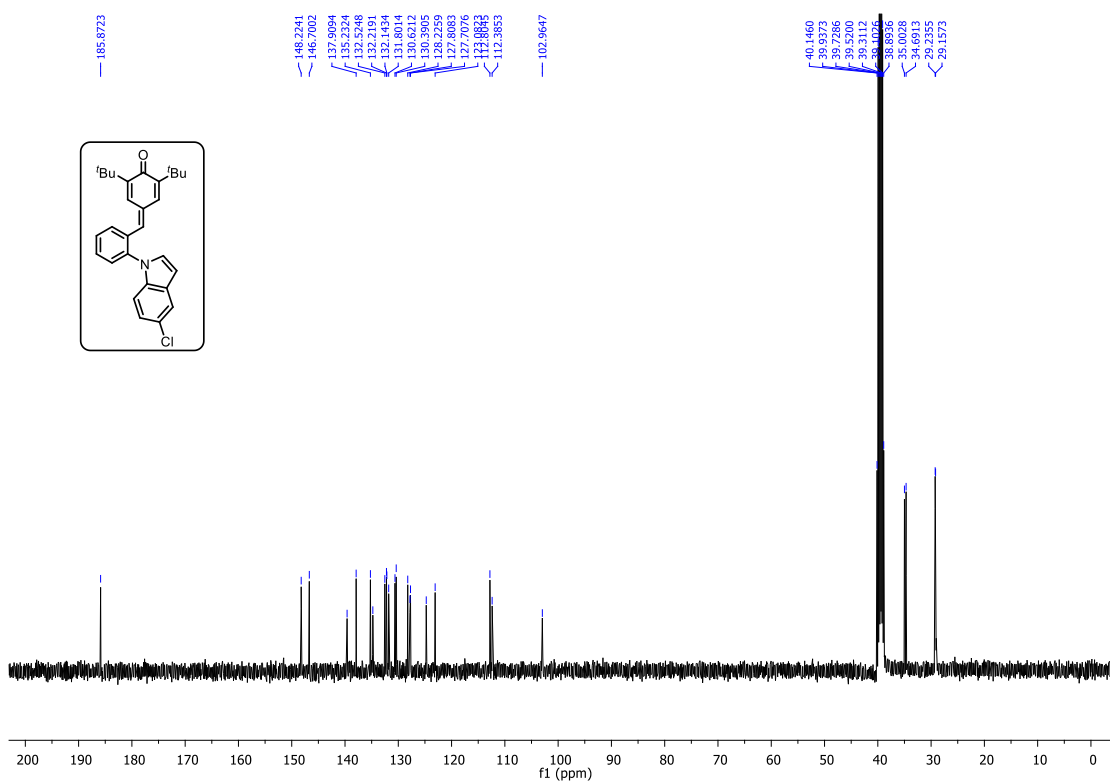

$^1\text{H}$  NMR (400 MHz,  $\text{DMSO-}d_6$ ) spectrum of **5d**

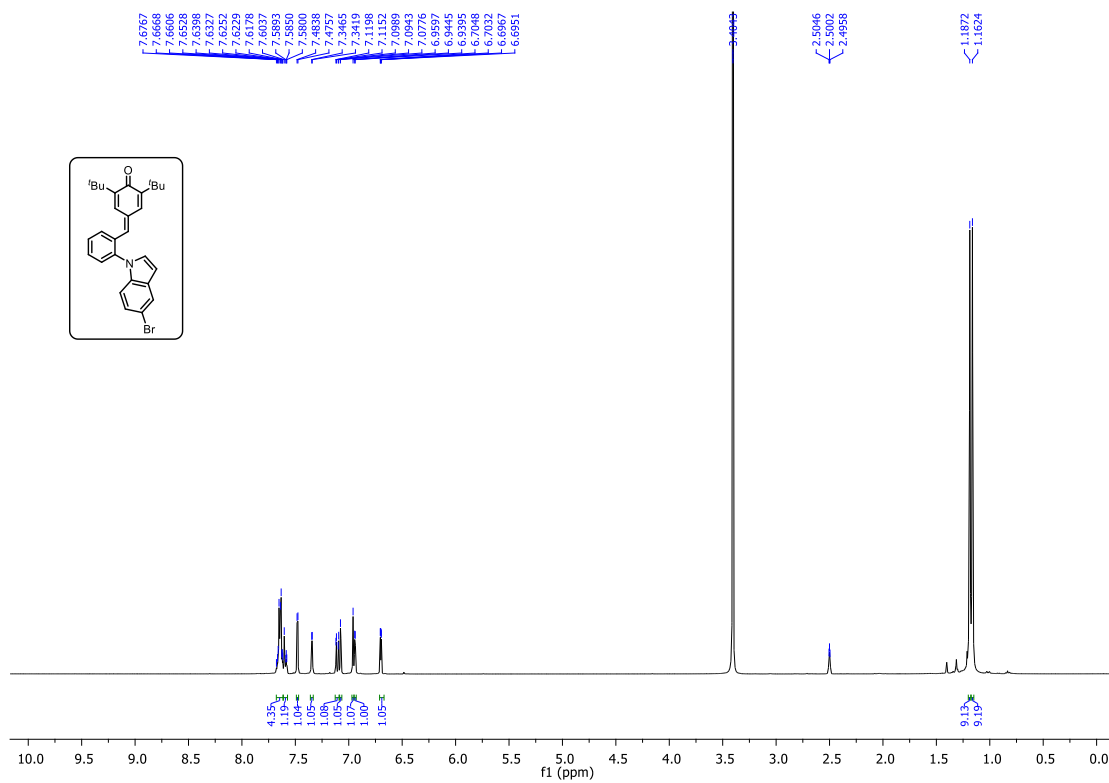

$^{13}\text{C}$  NMR (100 MHz,  $\text{DMSO-}d_6$ ) spectrum of **5d**

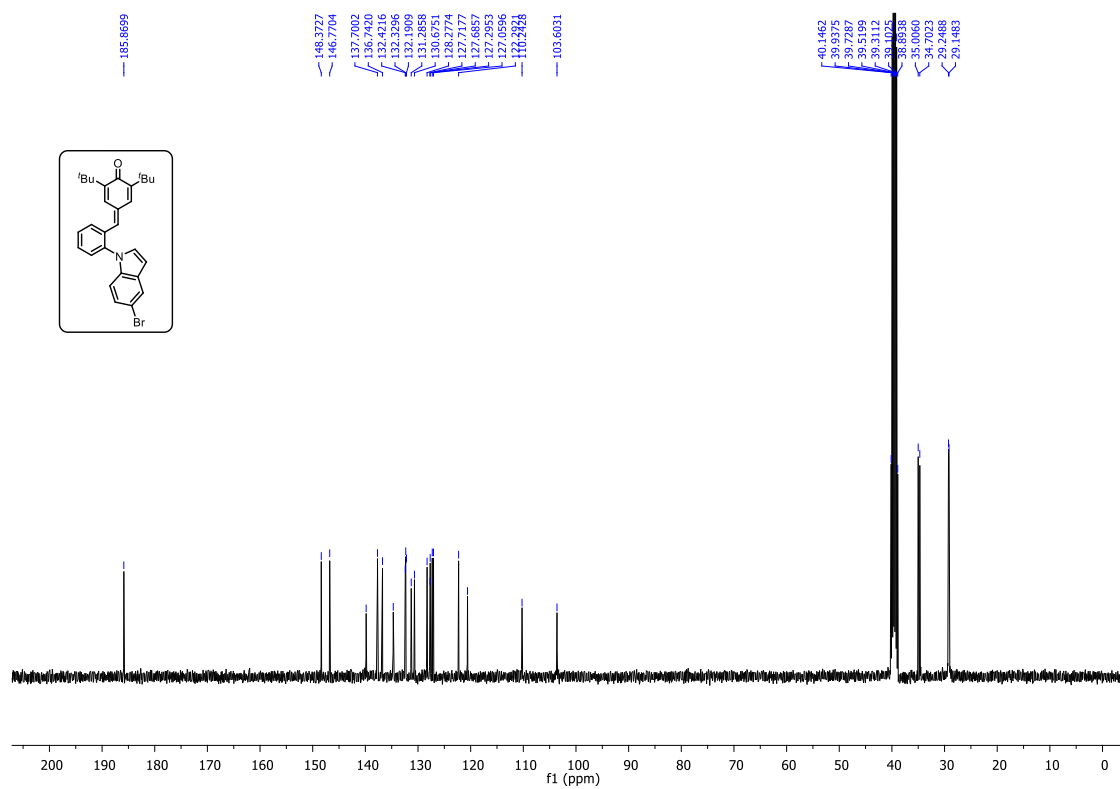

$^1\text{H}$  NMR (400 MHz,  $\text{CDCl}_3$ ) spectrum of **5e**

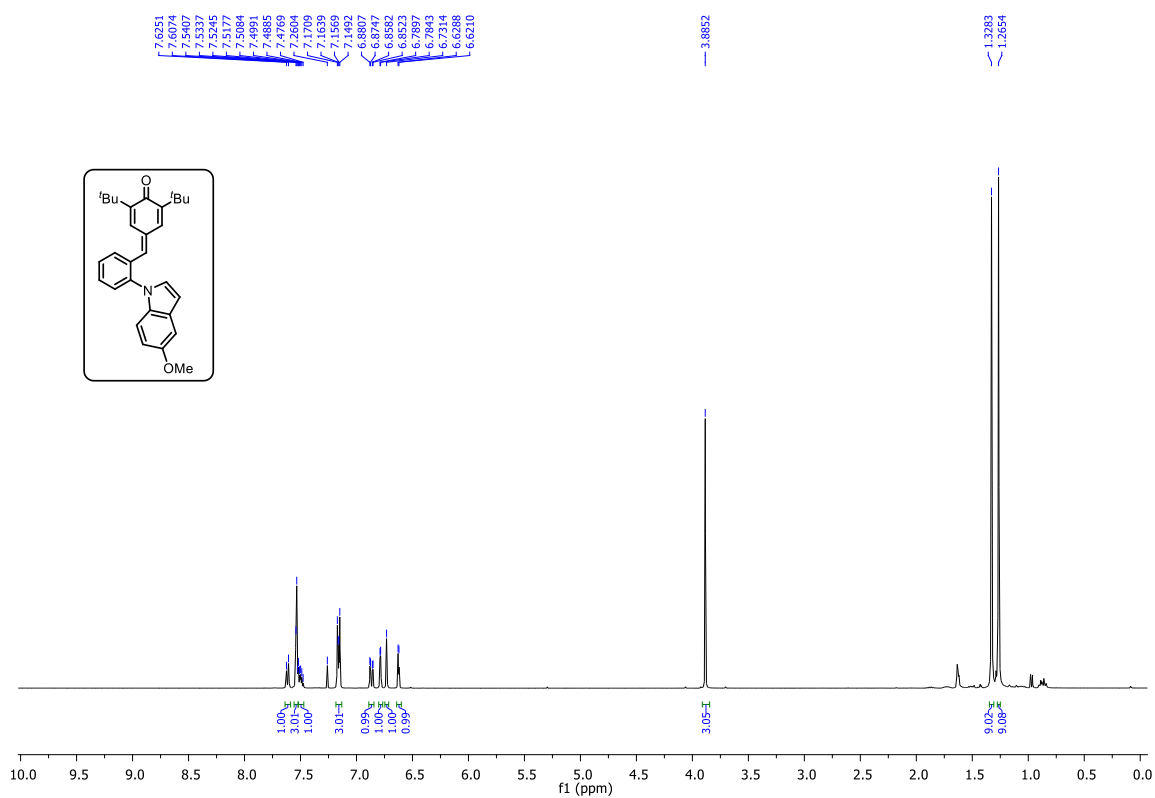



$^{13}\text{C}$  NMR (100 MHz,  $\text{CDCl}_3$ ) spectrum of **5e**

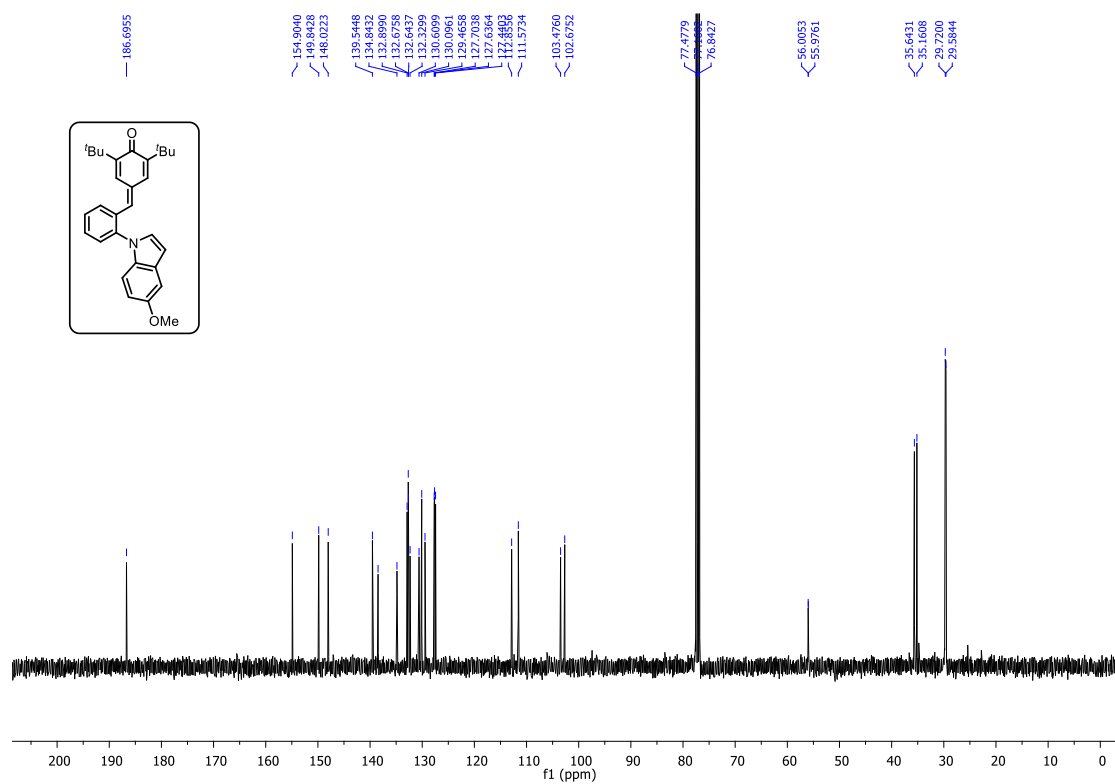

$^1\text{H}$  NMR (400 MHz,  $\text{CDCl}_3$ ) spectrum of **2a**

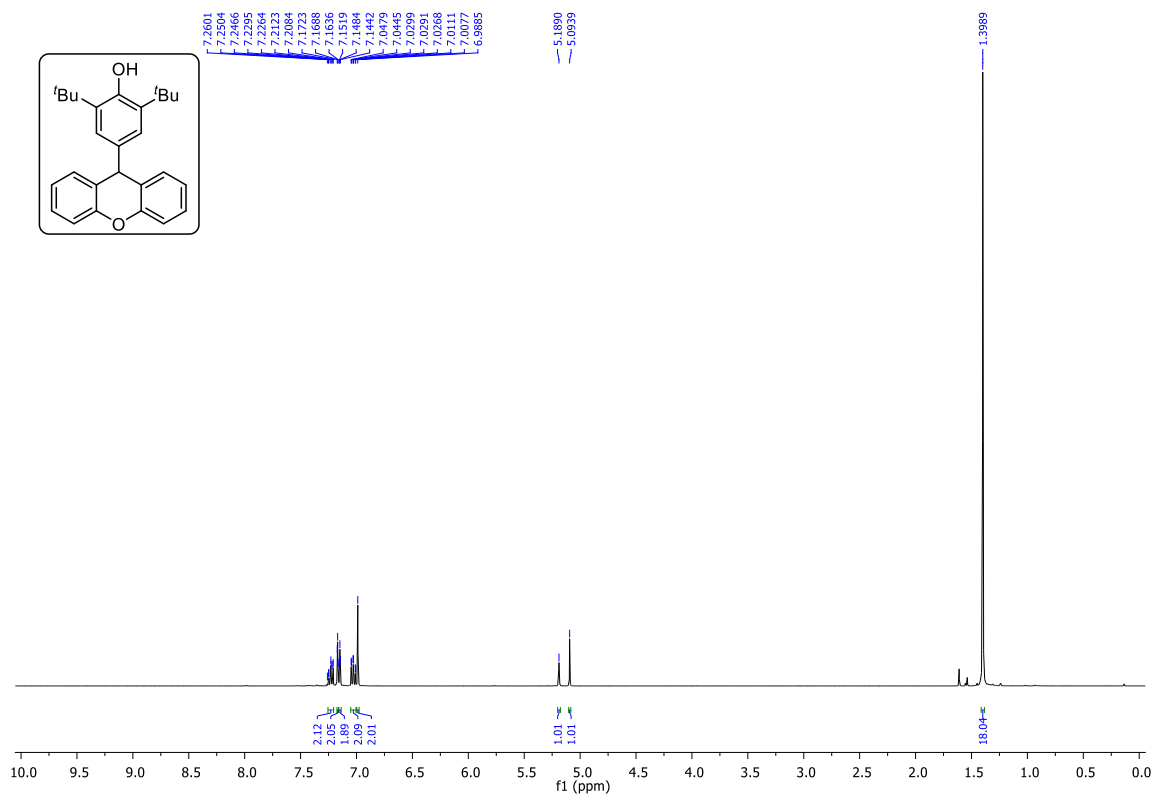

$^{13}\text{C}$   $\{^1\text{H}\}$  NMR (100 MHz,  $\text{CDCl}_3$ ) spectrum of **2a**

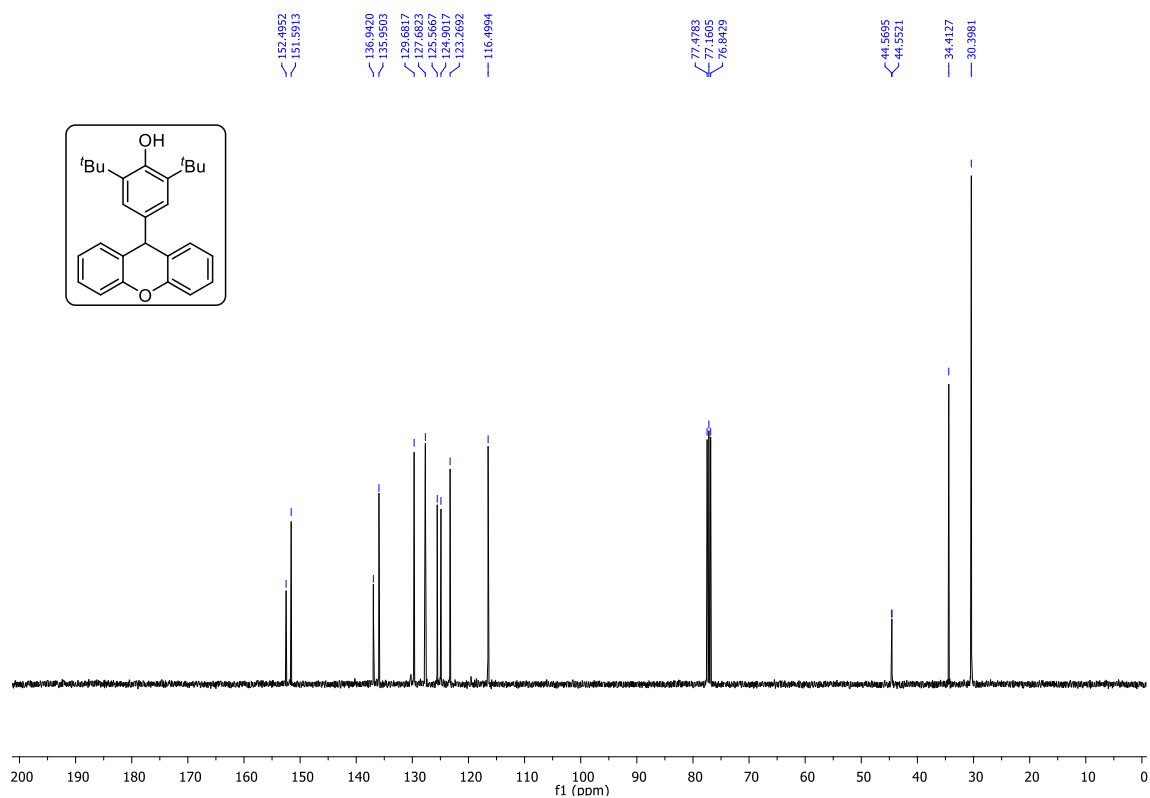

$^1\text{H}$  NMR (400 MHz,  $\text{CDCl}_3$ ) spectrum of **2b**

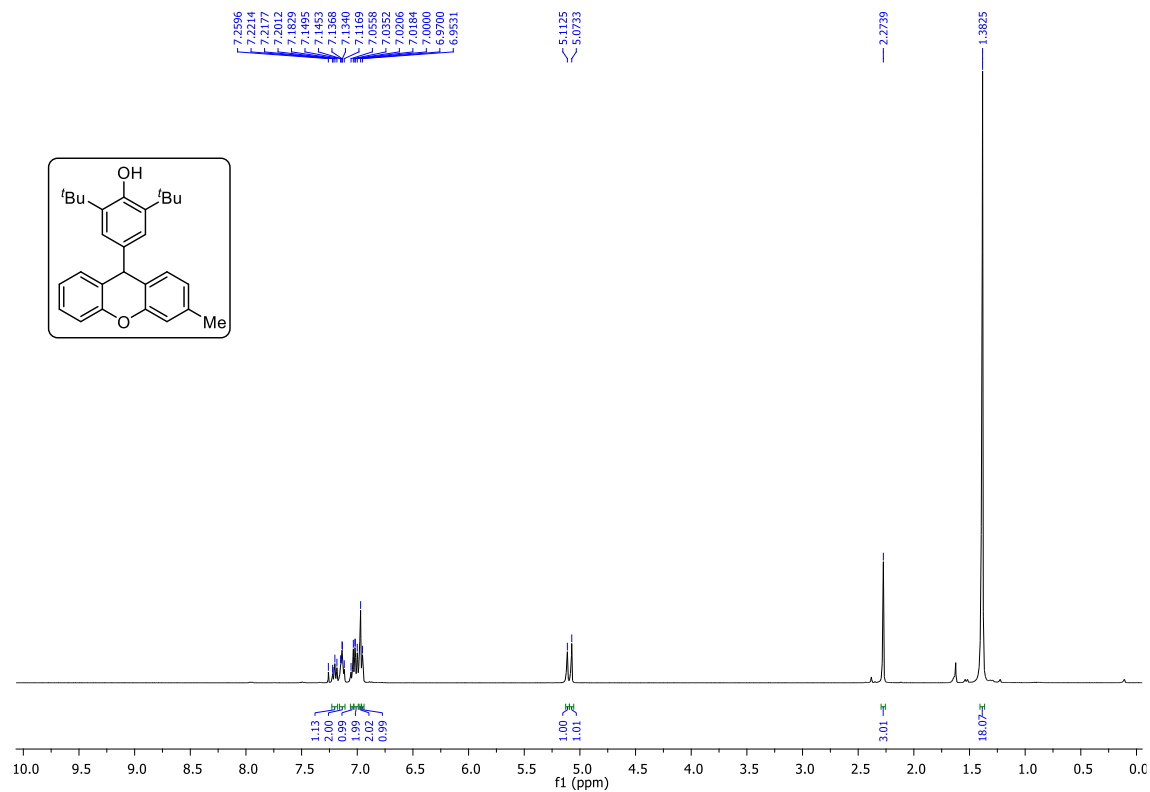

$^{13}\text{C}$   $\{^1\text{H}\}$  NMR (100 MHz,  $\text{CDCl}_3$ ) spectrum of **2b**

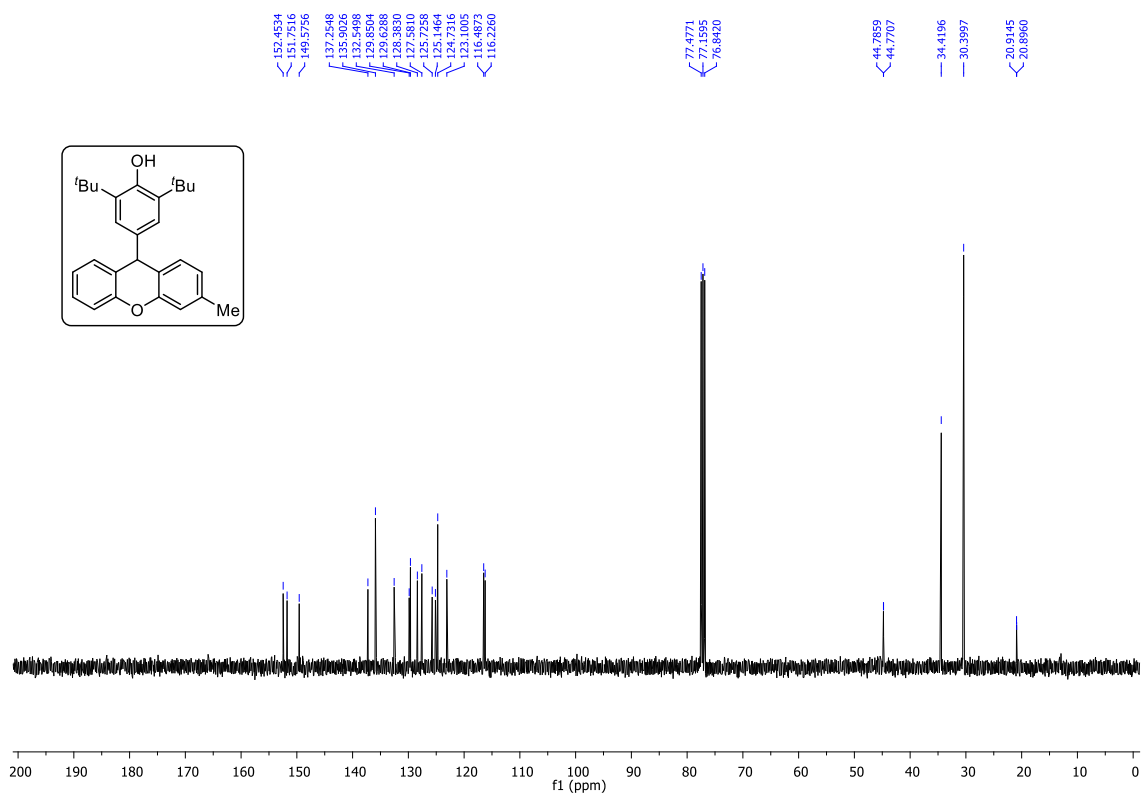

$^1\text{H}$  NMR (400 MHz,  $\text{CDCl}_3$ ) spectrum of **2c**

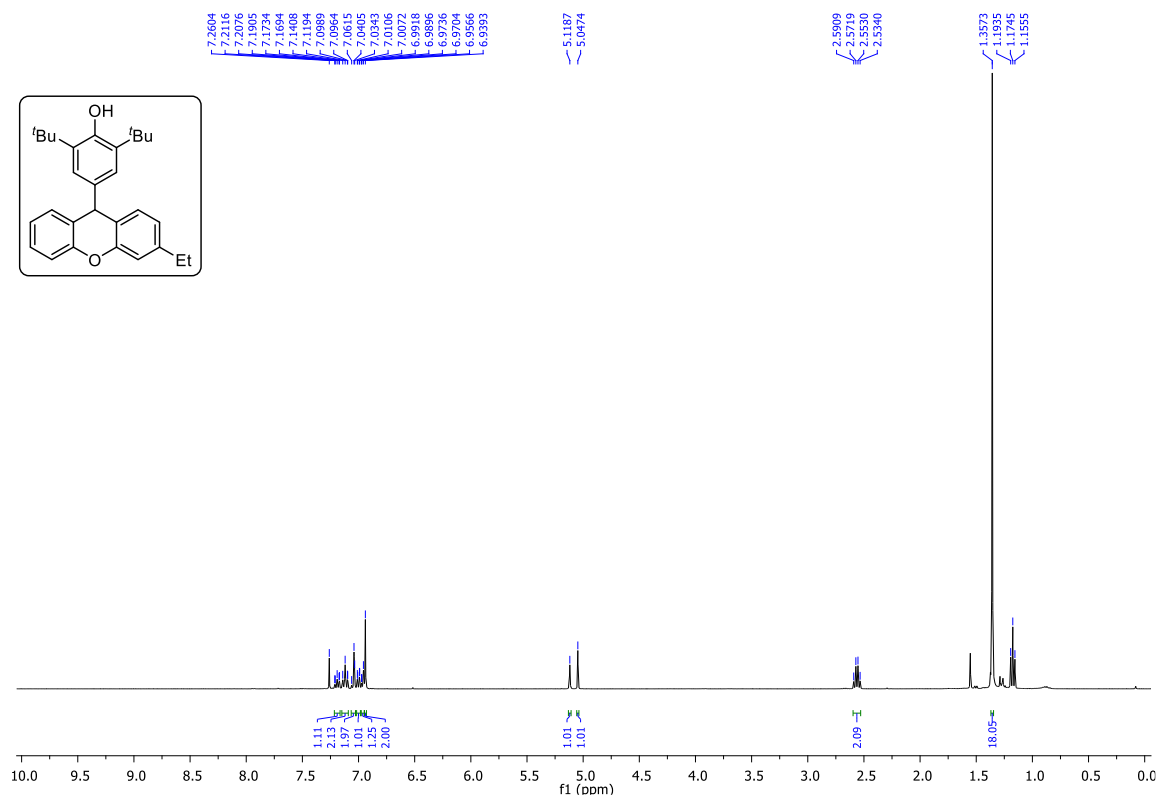

$^{13}\text{C}$   $\{^1\text{H}\}$  NMR (100 MHz,  $\text{CDCl}_3$ ) spectrum of **2c**

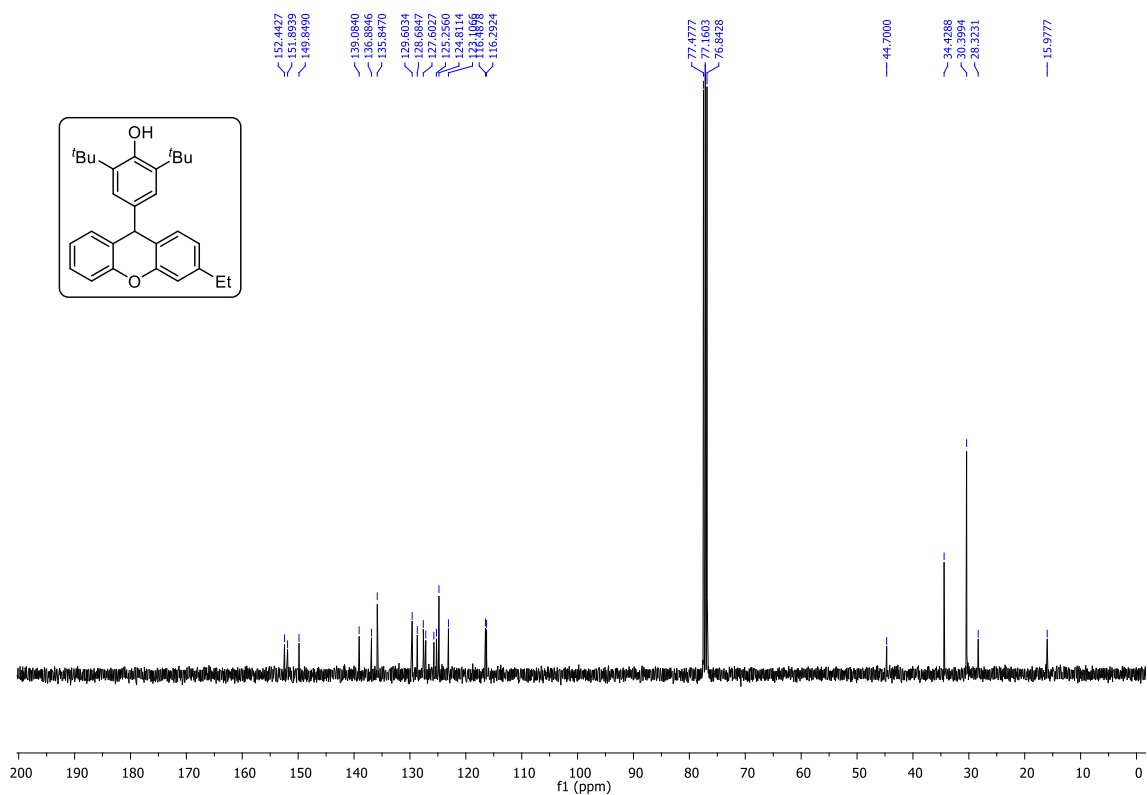

$^1\text{H}$  NMR (400 MHz,  $\text{CDCl}_3$ ) spectrum of **2d**

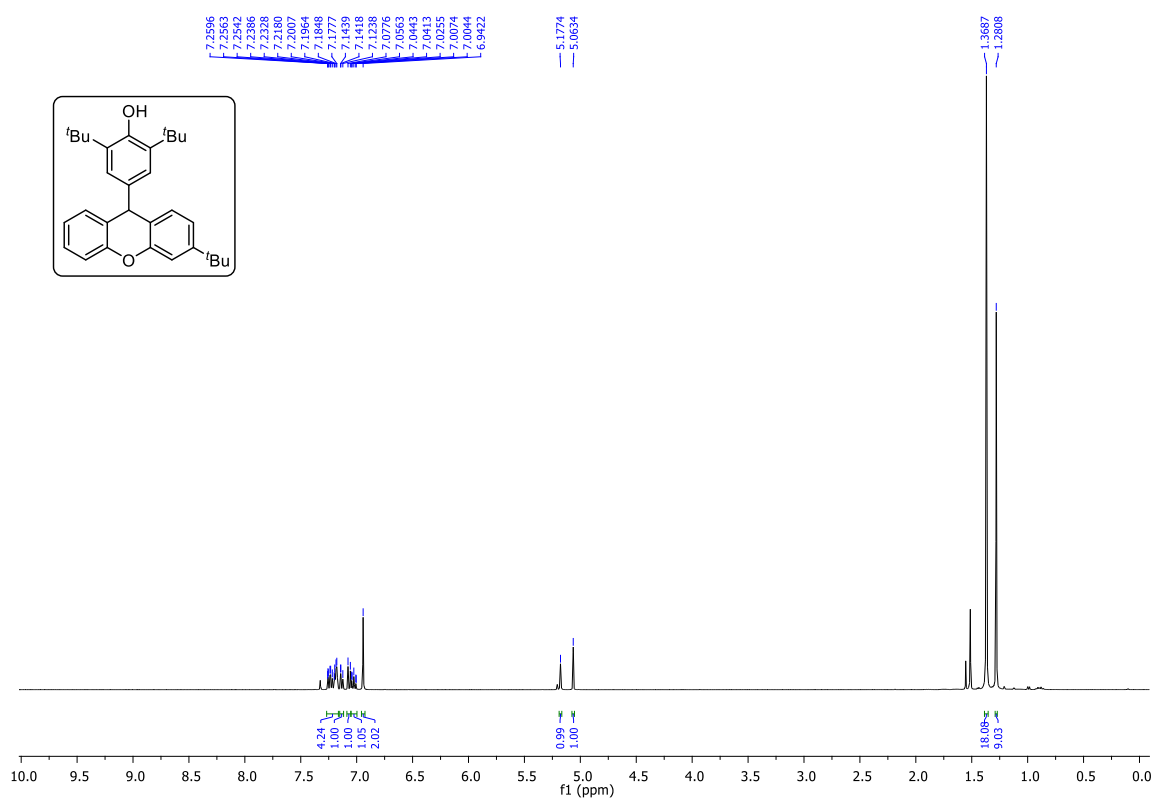

$^{13}\text{C}$   $\{^1\text{H}\}$  NMR (100 MHz,  $\text{CDCl}_3$ ) spectrum of **2d**

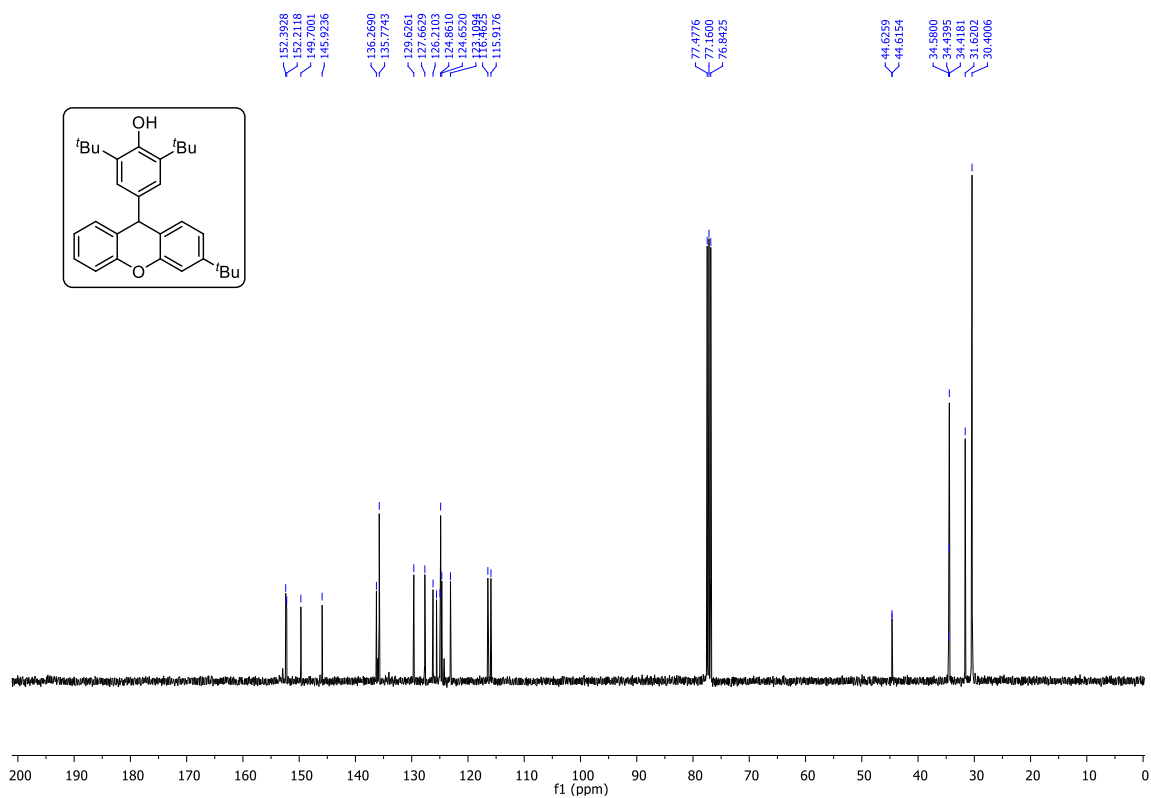

$^1\text{H}$  NMR (400 MHz,  $\text{CDCl}_3$ ) spectrum of **2e**

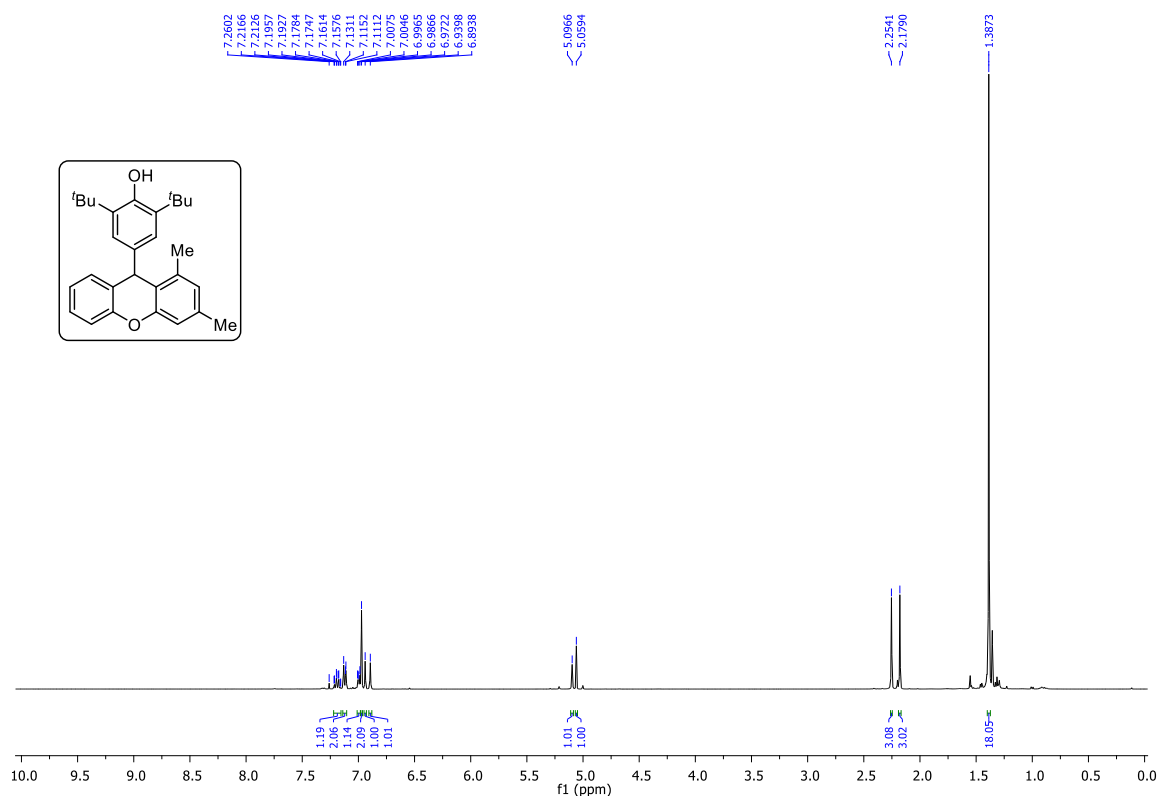

$^{13}\text{C}$   $\{^1\text{H}\}$  NMR (100 MHz,  $\text{CDCl}_3$ ) spectrum of **2e**

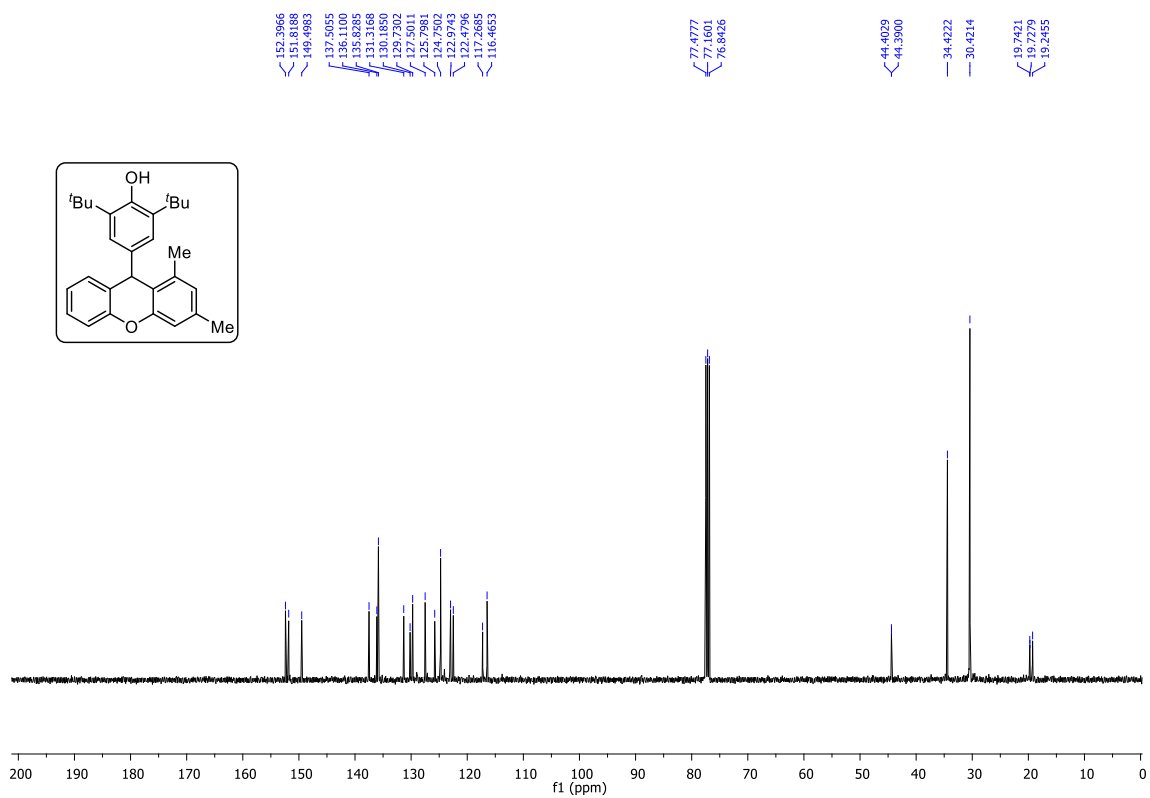

$^1\text{H}$  NMR (400 MHz,  $\text{CDCl}_3$ ) spectrum of **2f**

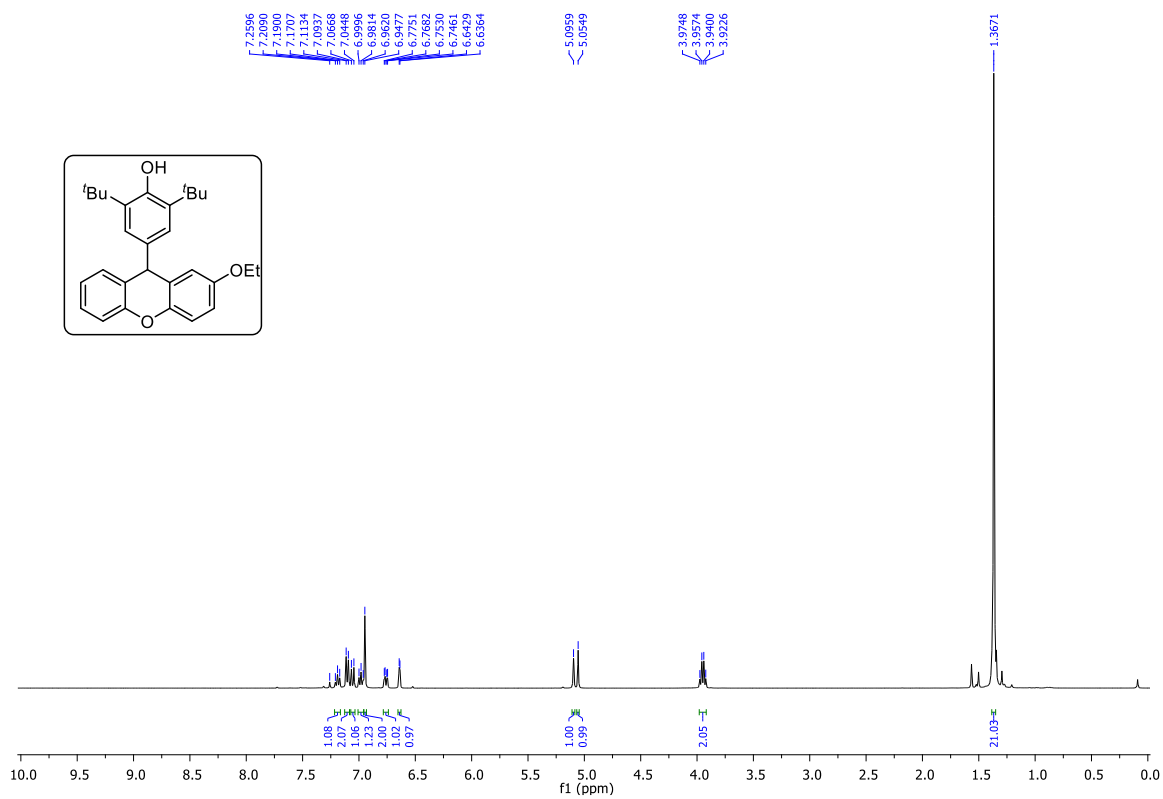

$^{13}\text{C}$   $\{^1\text{H}\}$  NMR (100 MHz,  $\text{CDCl}_3$ ) spectrum of **2f**

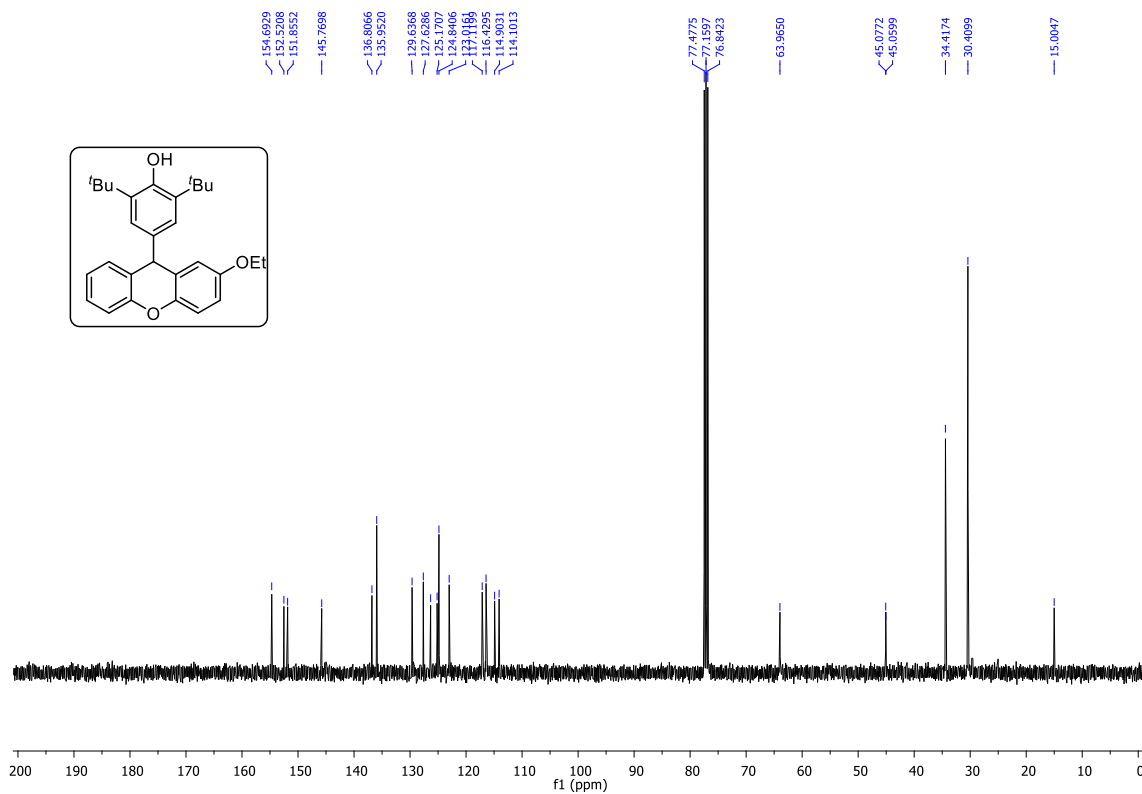

$^1\text{H}$  NMR (400 MHz,  $\text{CDCl}_3$ ) spectrum of **2g**

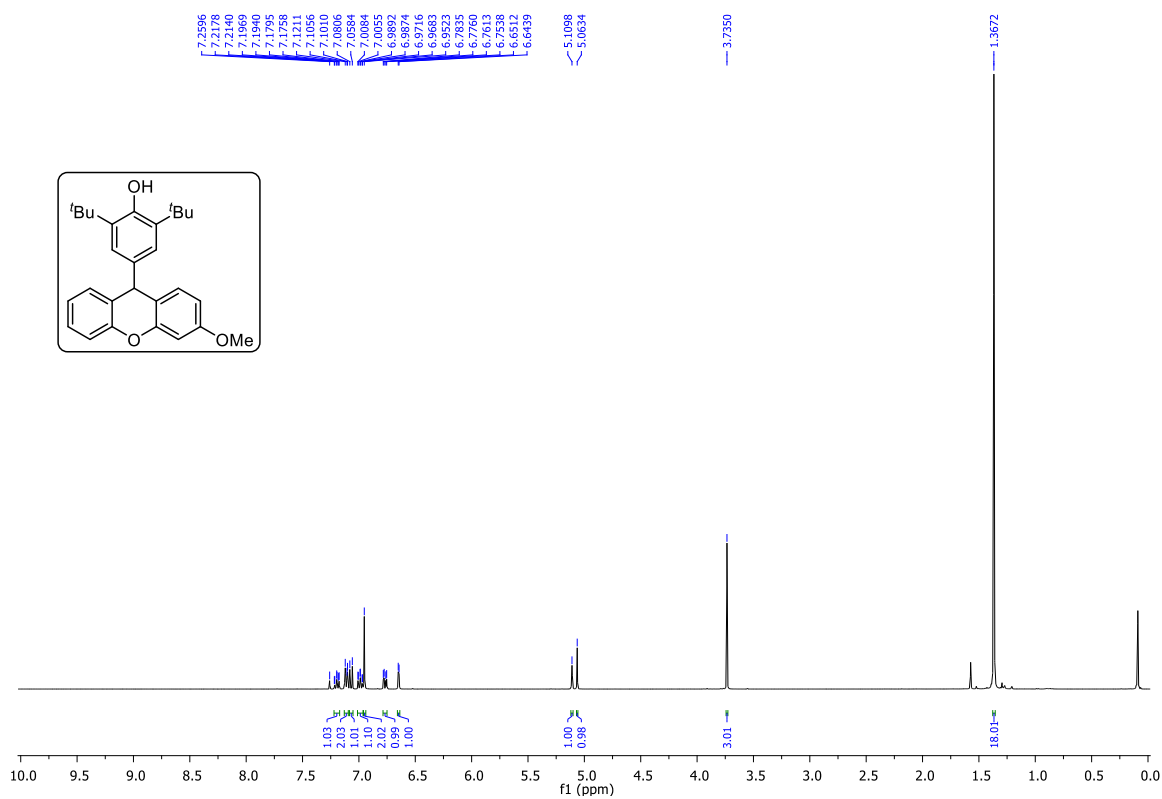

$^{13}\text{C}$   $\{^1\text{H}\}$  NMR (100 MHz,  $\text{CDCl}_3$ ) spectrum of **2g**

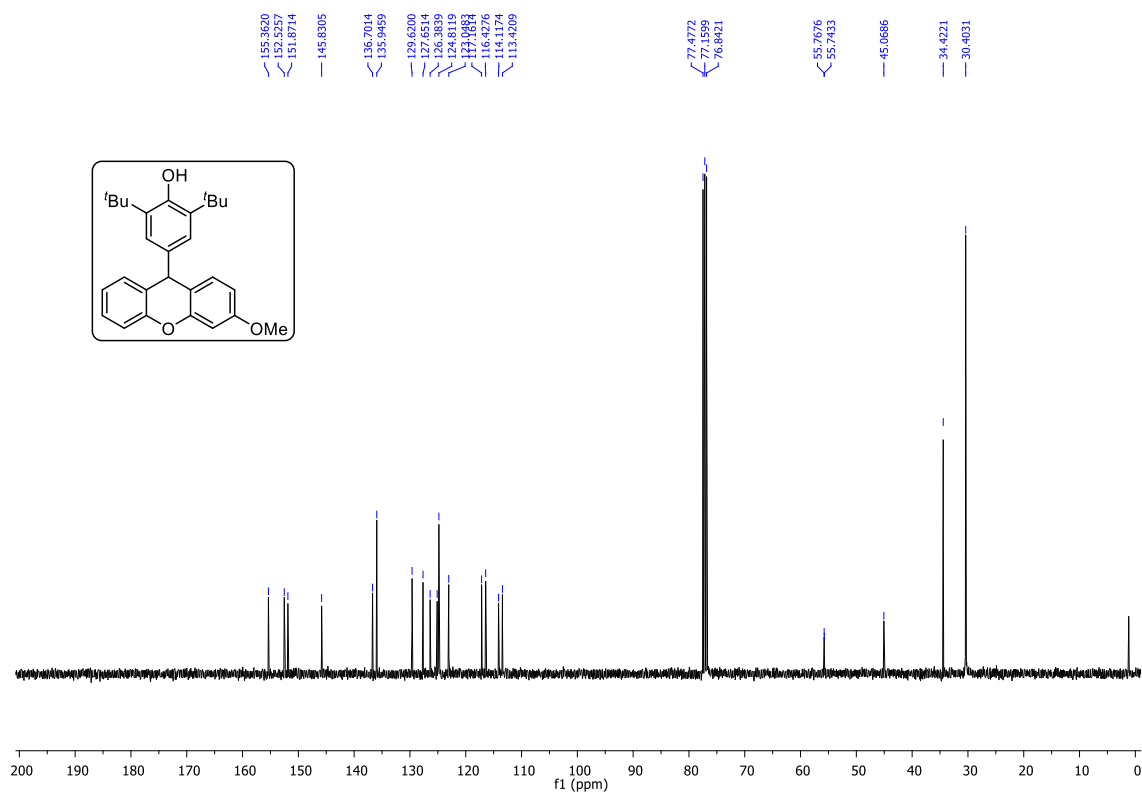

$^1\text{H}$  NMR (400 MHz,  $\text{CDCl}_3$ ) spectrum of **2h**

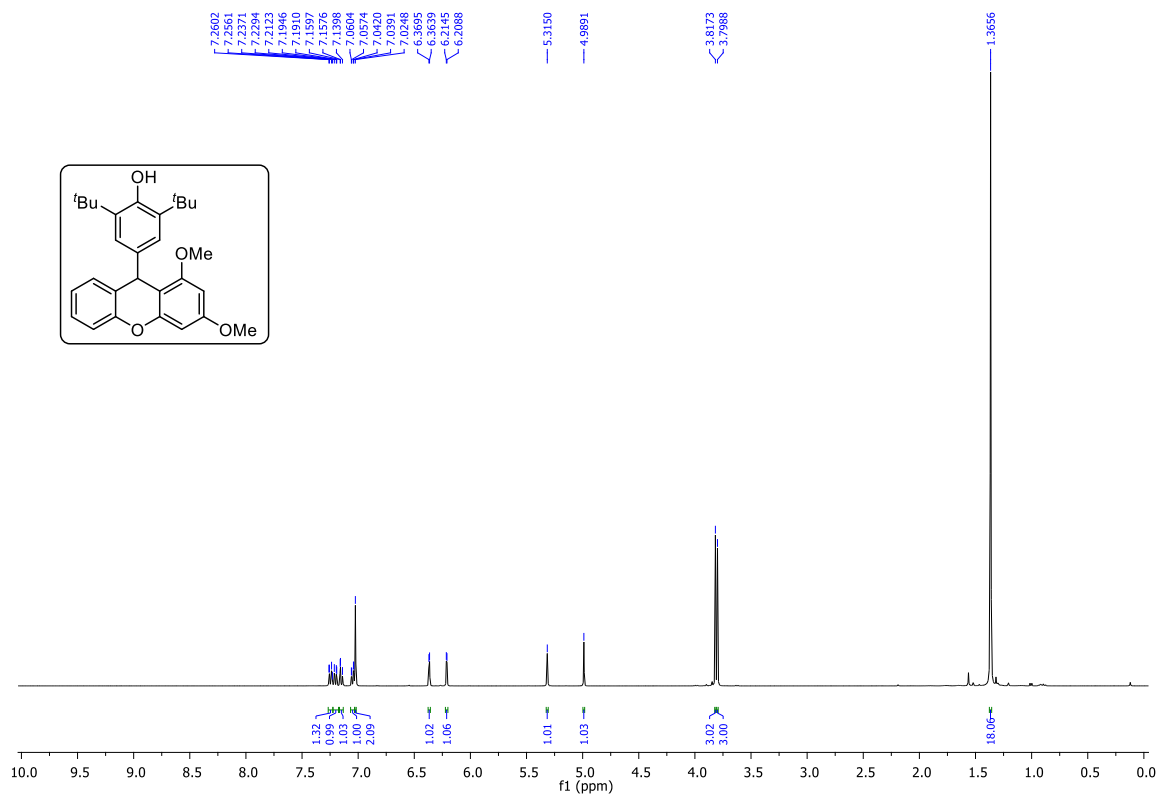



$^{13}\text{C}$   $\{^1\text{H}\}$  NMR (100 MHz,  $\text{CDCl}_3$ ) spectrum of **2h**

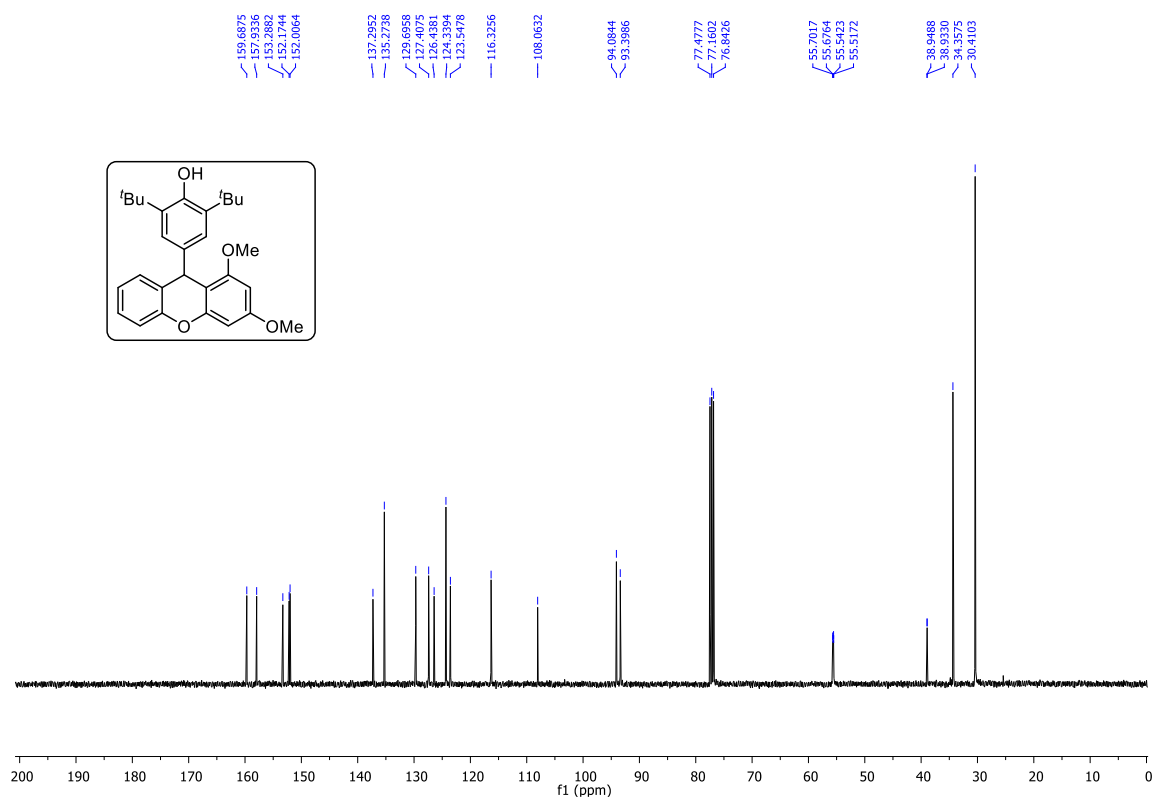

$^1\text{H}$  NMR (400 MHz,  $\text{CDCl}_3$ ) spectrum of **2i**

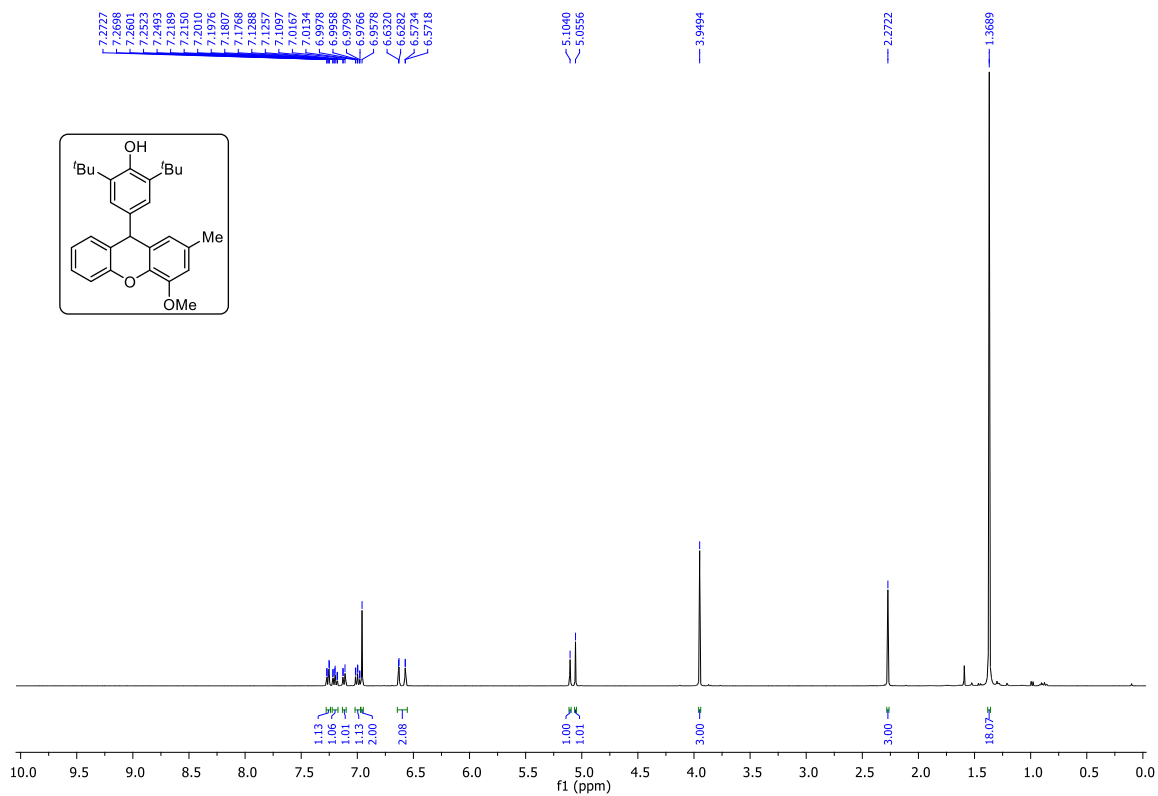

$^{13}\text{C}$   $\{^1\text{H}\}$  NMR (100 MHz,  $\text{CDCl}_3$ ) spectrum of **2i**

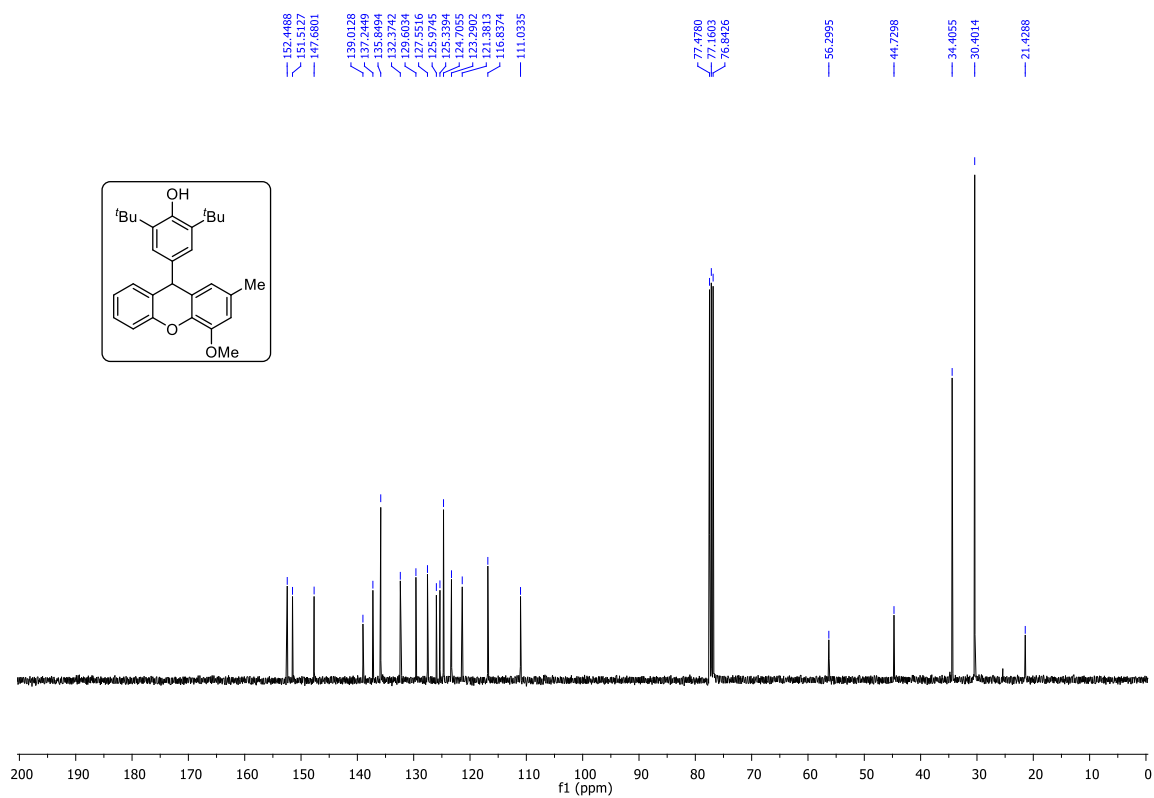

$^1\text{H}$  NMR (400 MHz,  $\text{CDCl}_3$ ) spectrum of **2j**

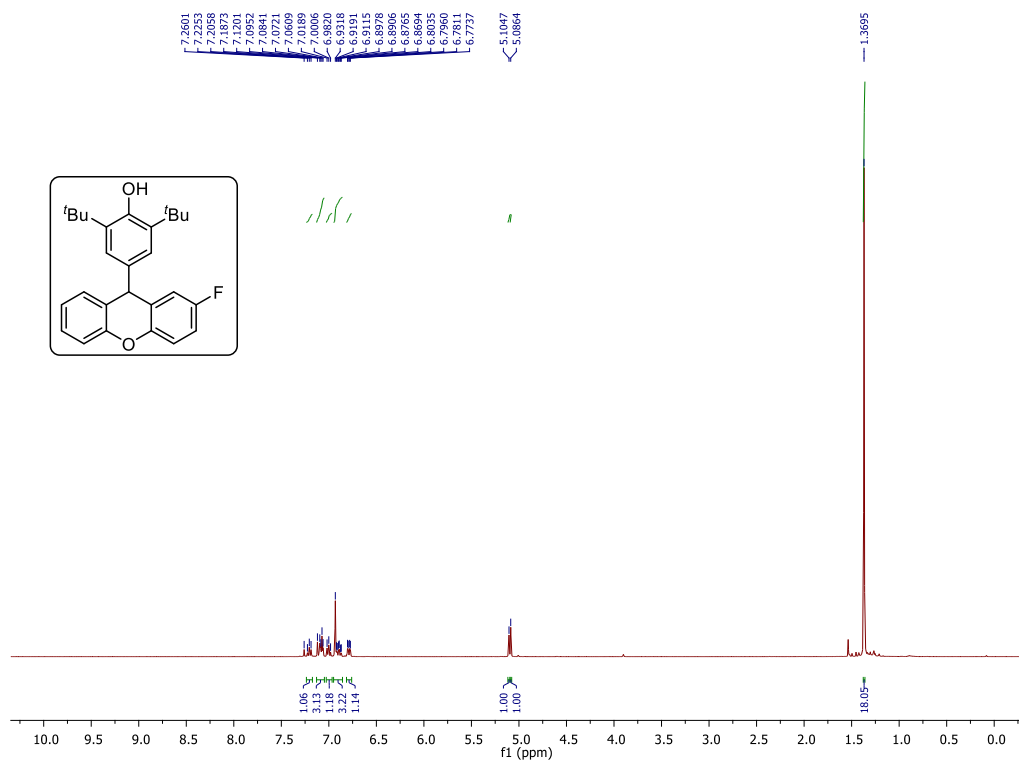

$^{13}\text{C}$  { $^1\text{H}$ } NMR (100 MHz,  $\text{CDCl}_3$ ) spectrum of **2j**

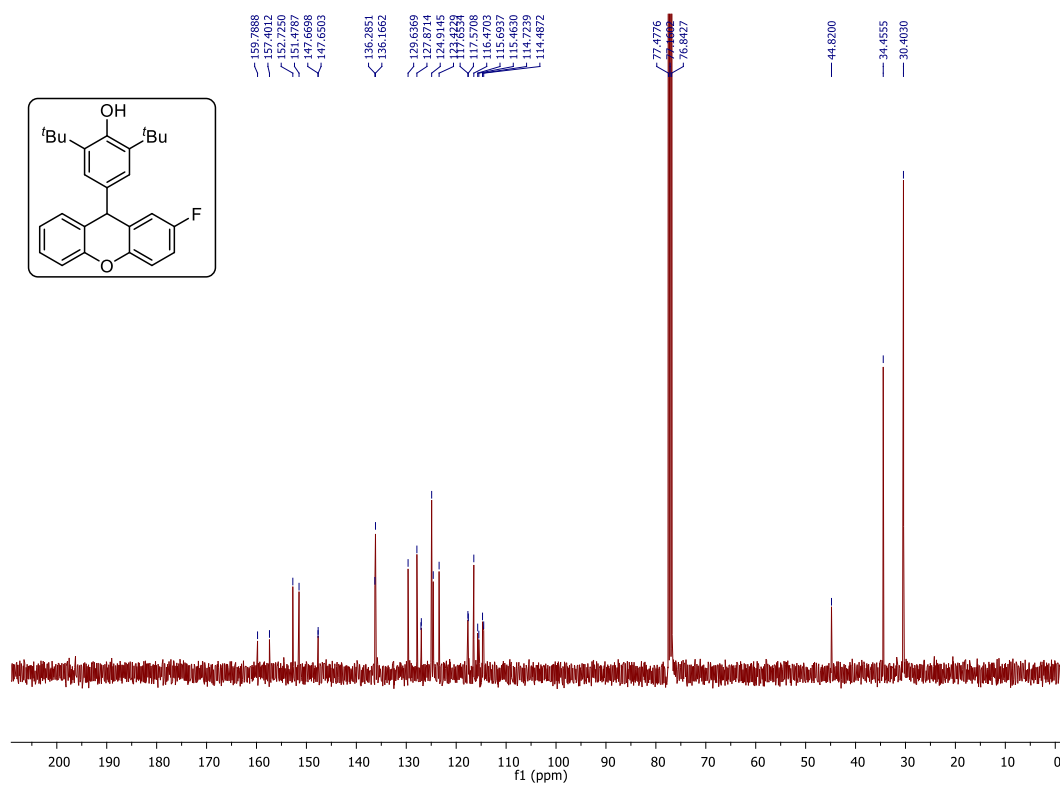

$^{19}\text{F}$  { $^1\text{H}$ } NMR (376 MHz,  $\text{CDCl}_3$ ) spectrum of **2j**

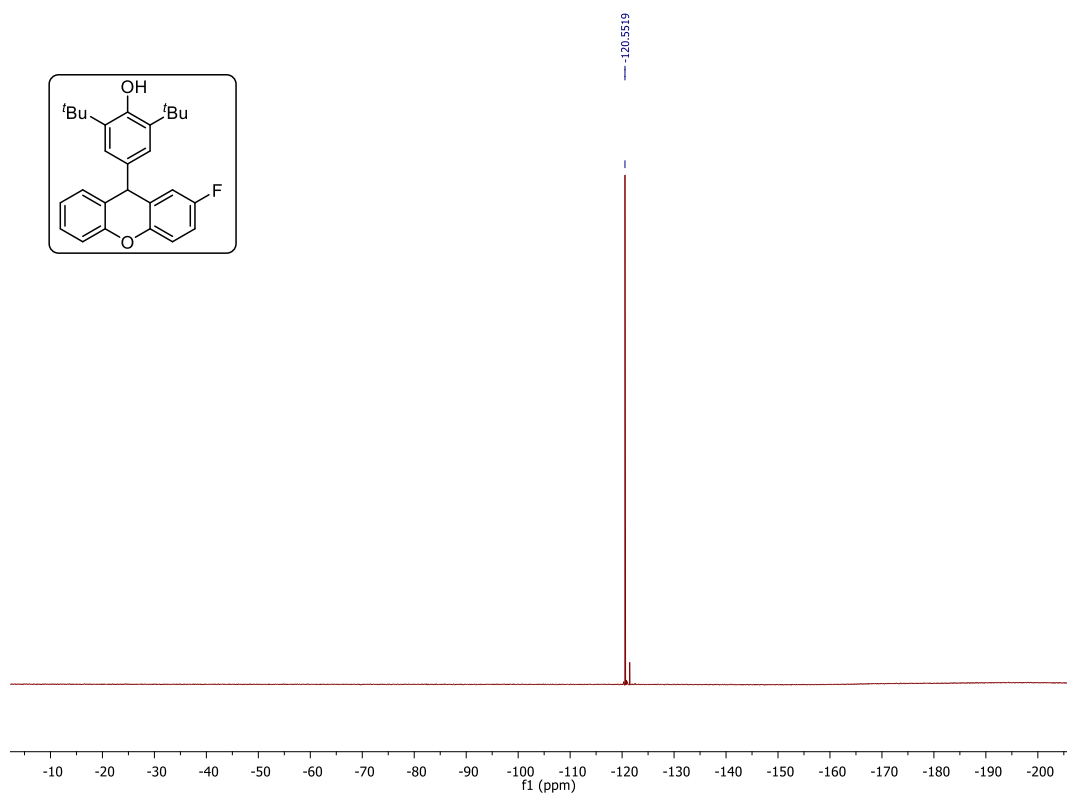

$^1\text{H}$  NMR (400 MHz,  $\text{CDCl}_3$ ) spectrum of **2k**

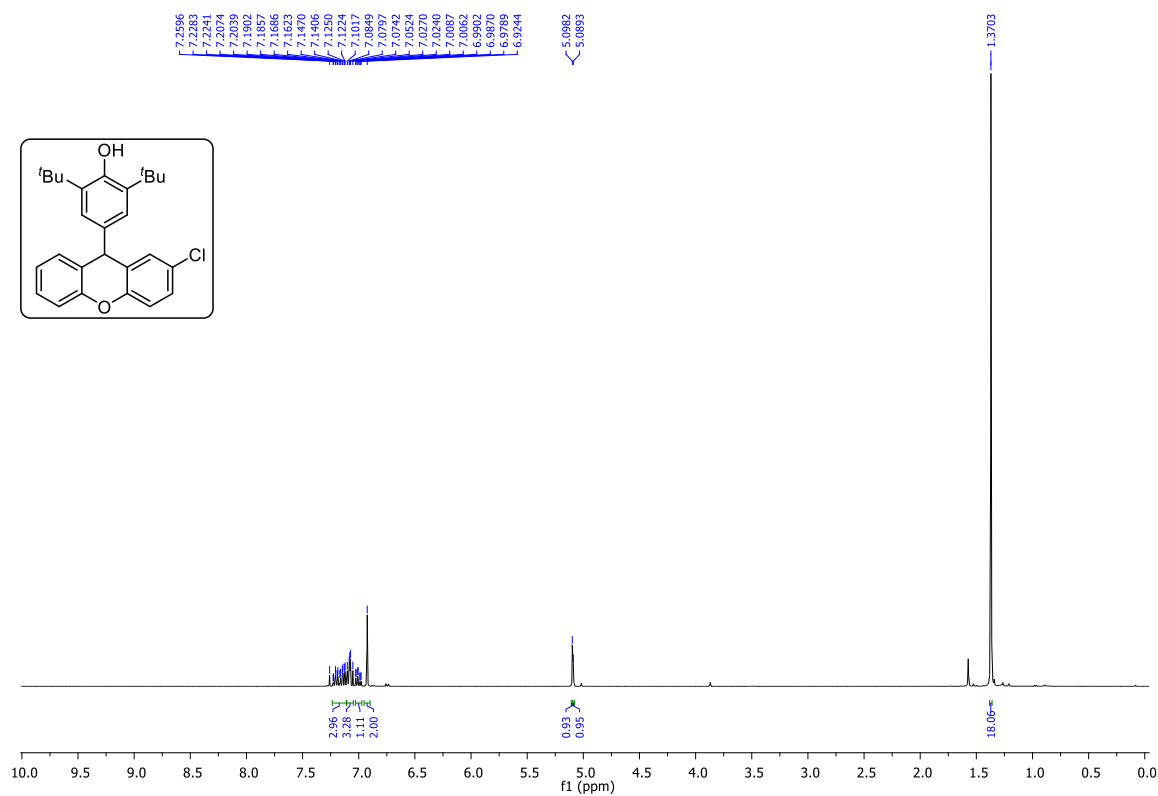

$^{13}\text{C}$   $\{^1\text{H}\}$  NMR (100 MHz,  $\text{CDCl}_3$ ) spectrum of **2k**

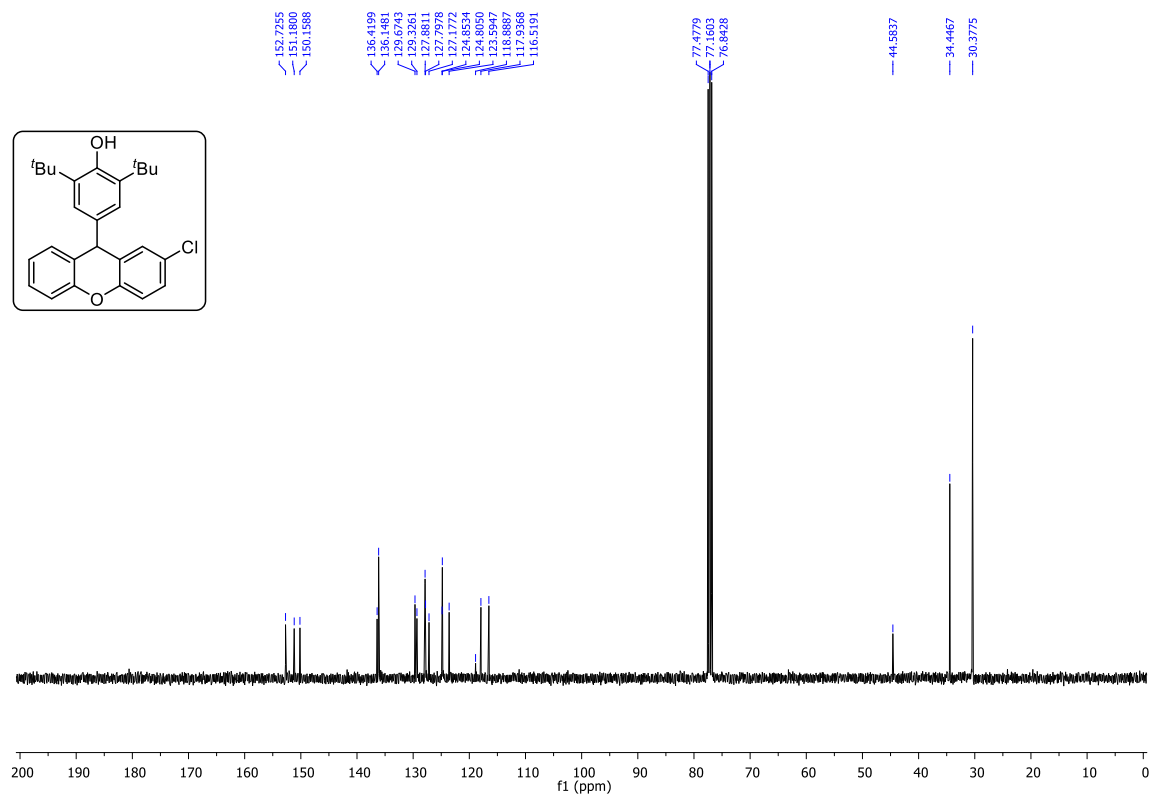

<sup>1</sup>H NMR (400 MHz, CDCl<sub>3</sub>) spectrum of **21**

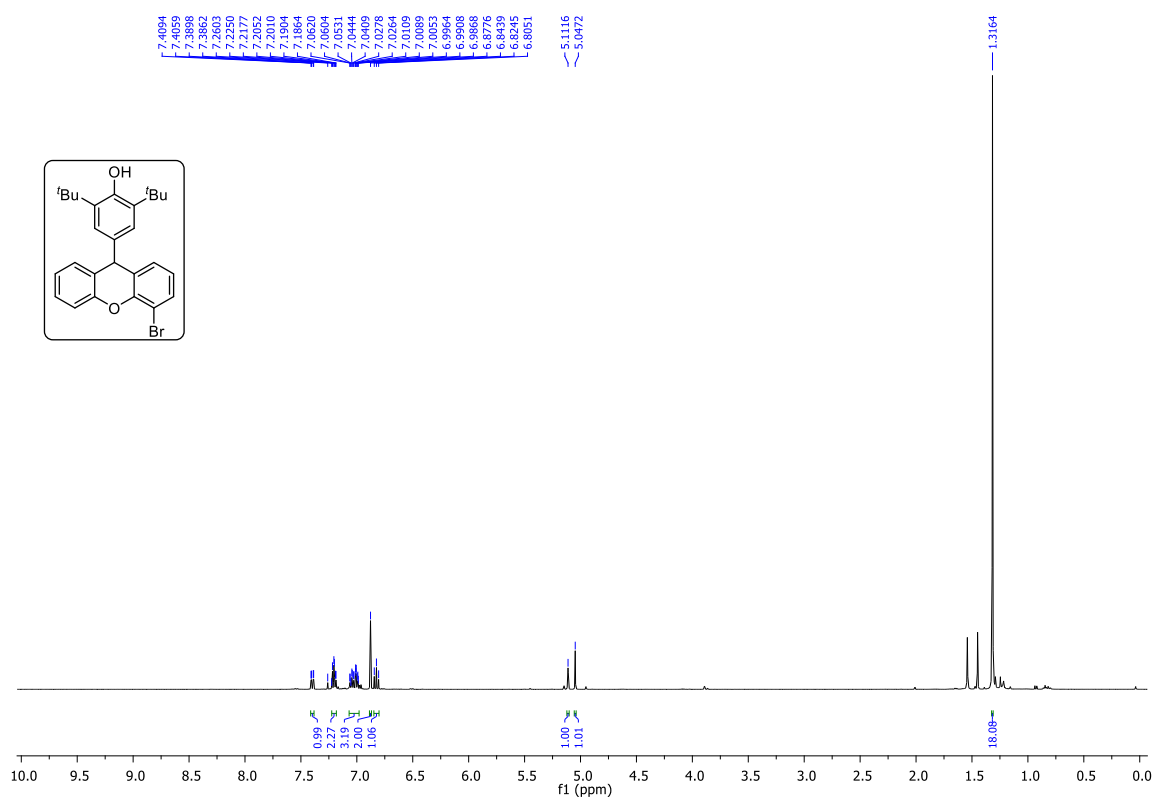

<sup>13</sup>C {<sup>1</sup>H} NMR (100 MHz, CDCl<sub>3</sub>) spectrum of **21**

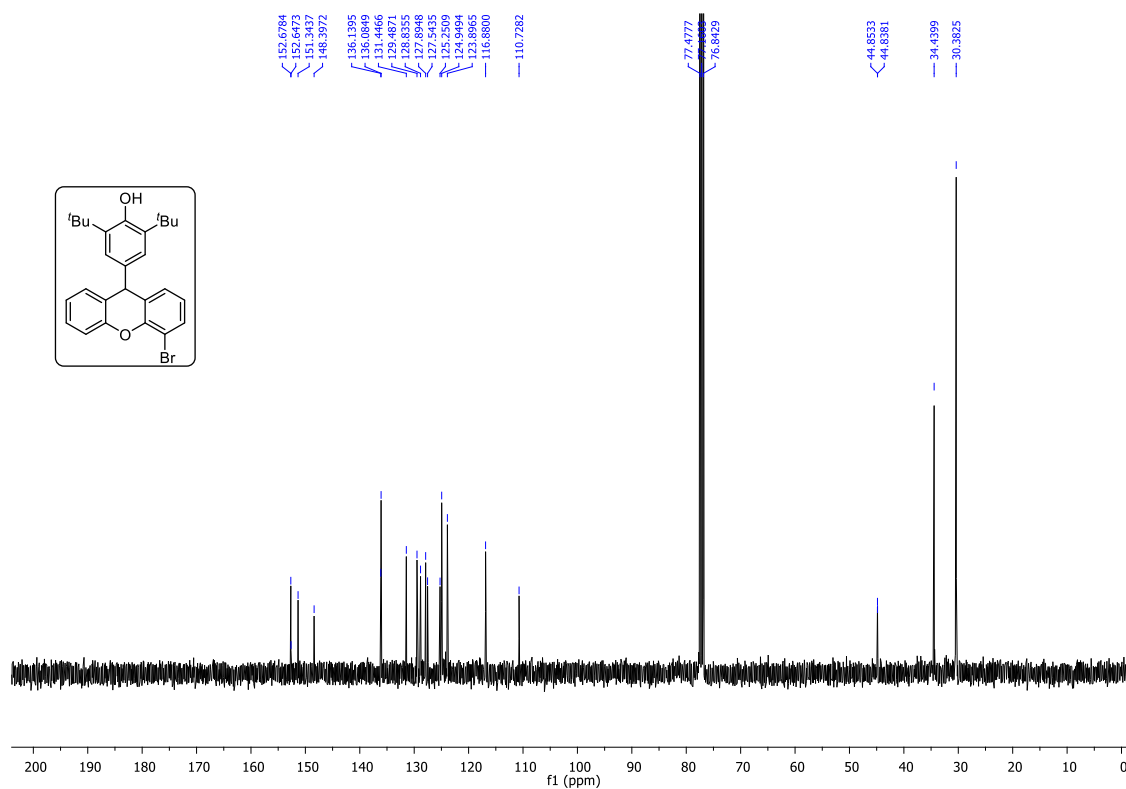

$^1\text{H}$  NMR (400 MHz,  $\text{CDCl}_3$ ) spectrum of **2m**

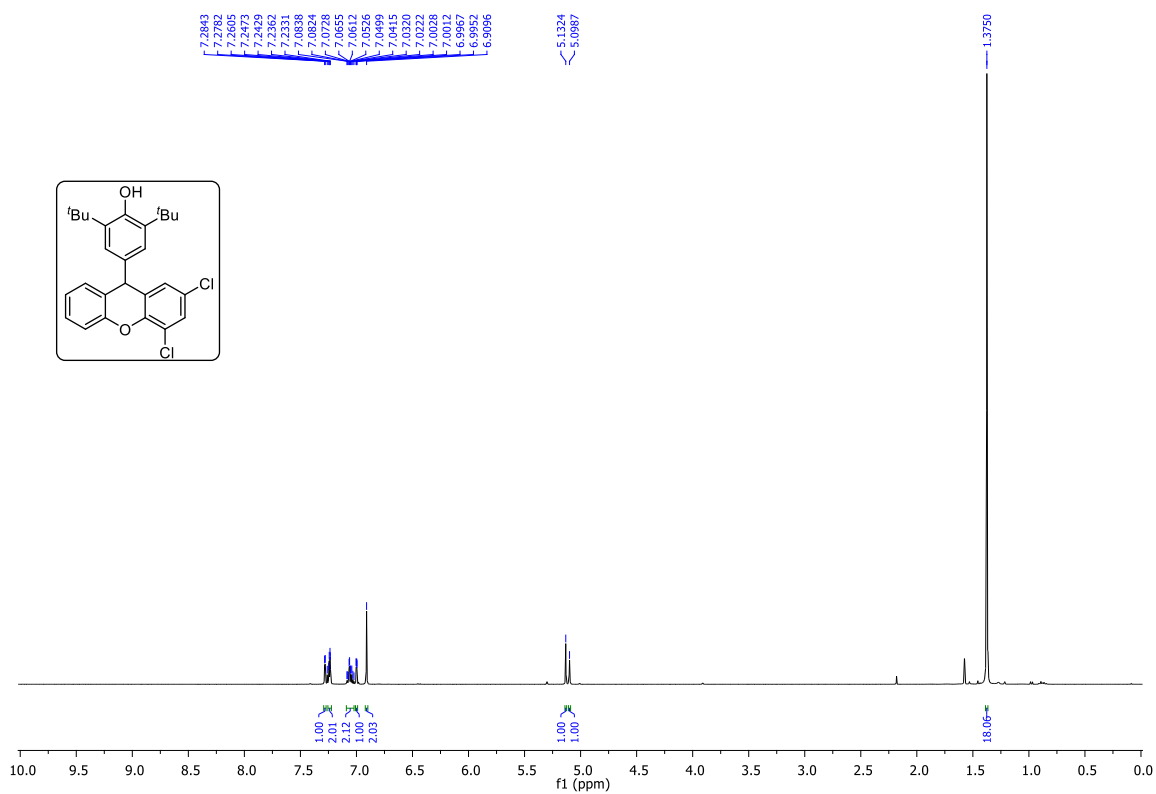

$^{13}\text{C}$  { $^1\text{H}$ } NMR (100 MHz,  $\text{CDCl}_3$ ) spectrum of **2m**

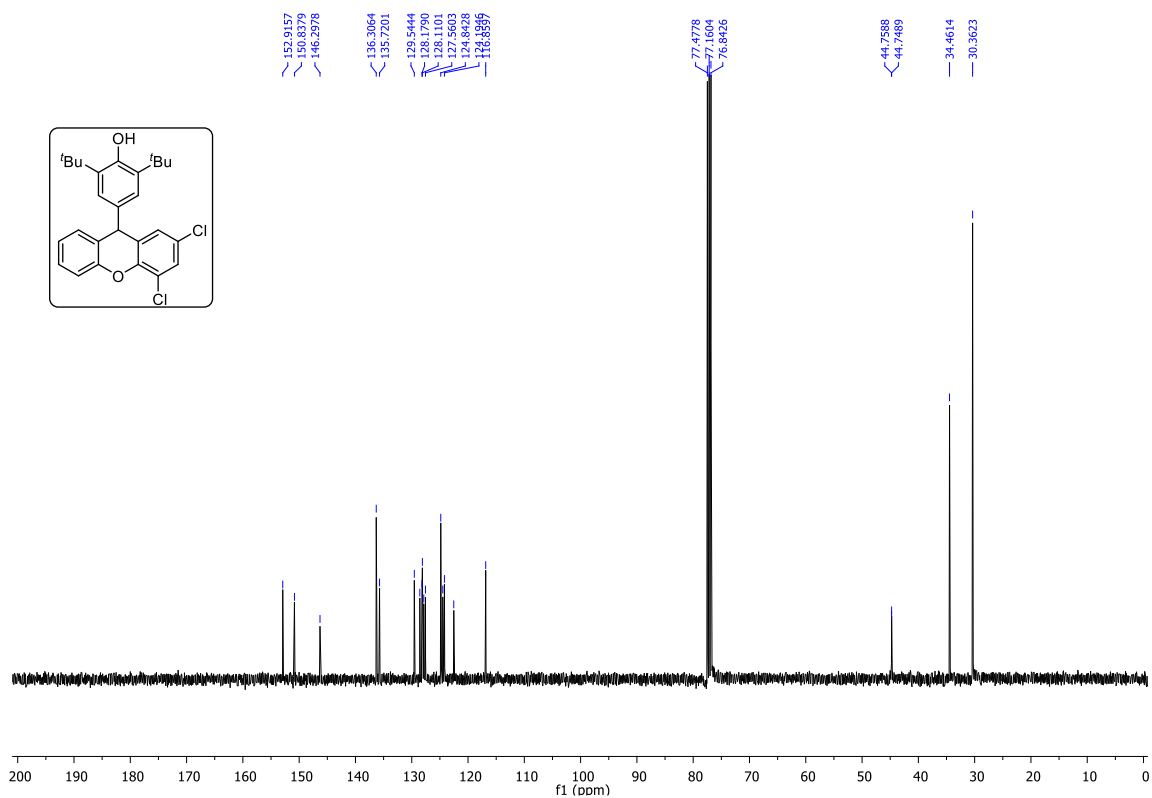

<sup>1</sup>H NMR (400 MHz, CDCl<sub>3</sub>) spectrum of **2n**

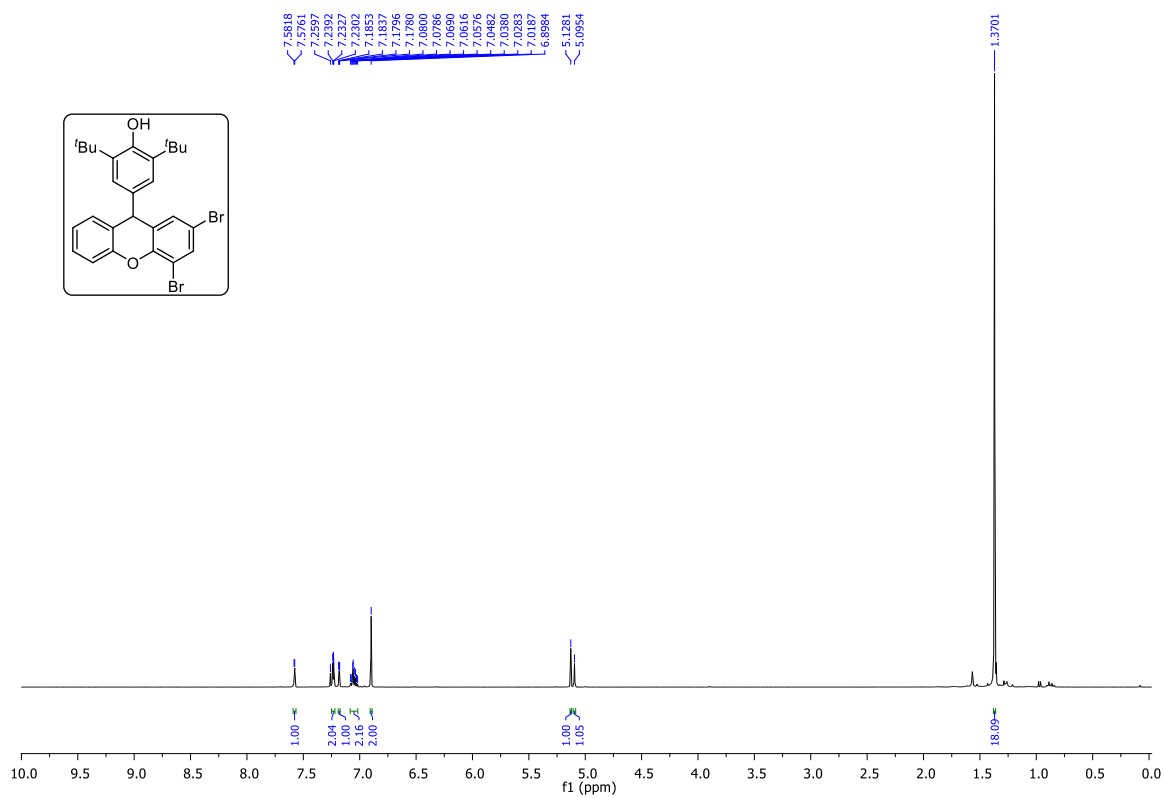

<sup>13</sup>C {<sup>1</sup>H} NMR (100 MHz, CDCl<sub>3</sub>) spectrum of **2n**

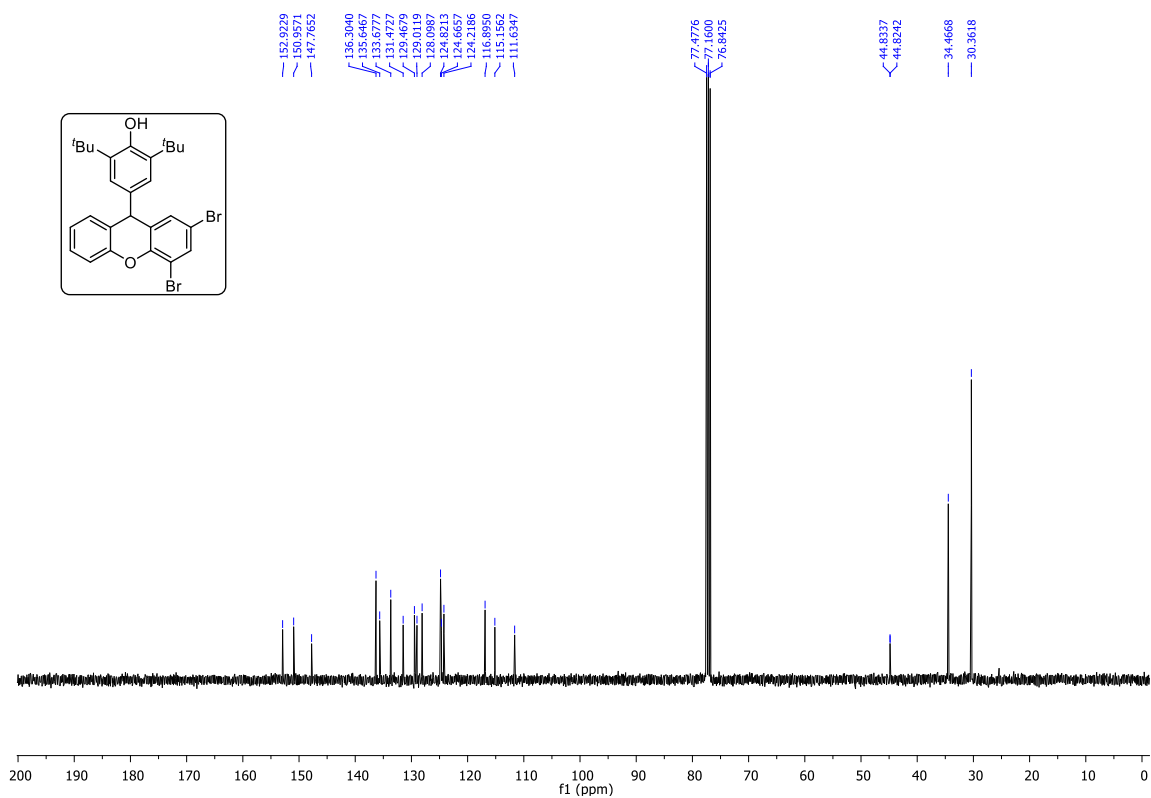

$^1\text{H}$  NMR (400 MHz,  $\text{CDCl}_3$ ) spectrum of **2o**

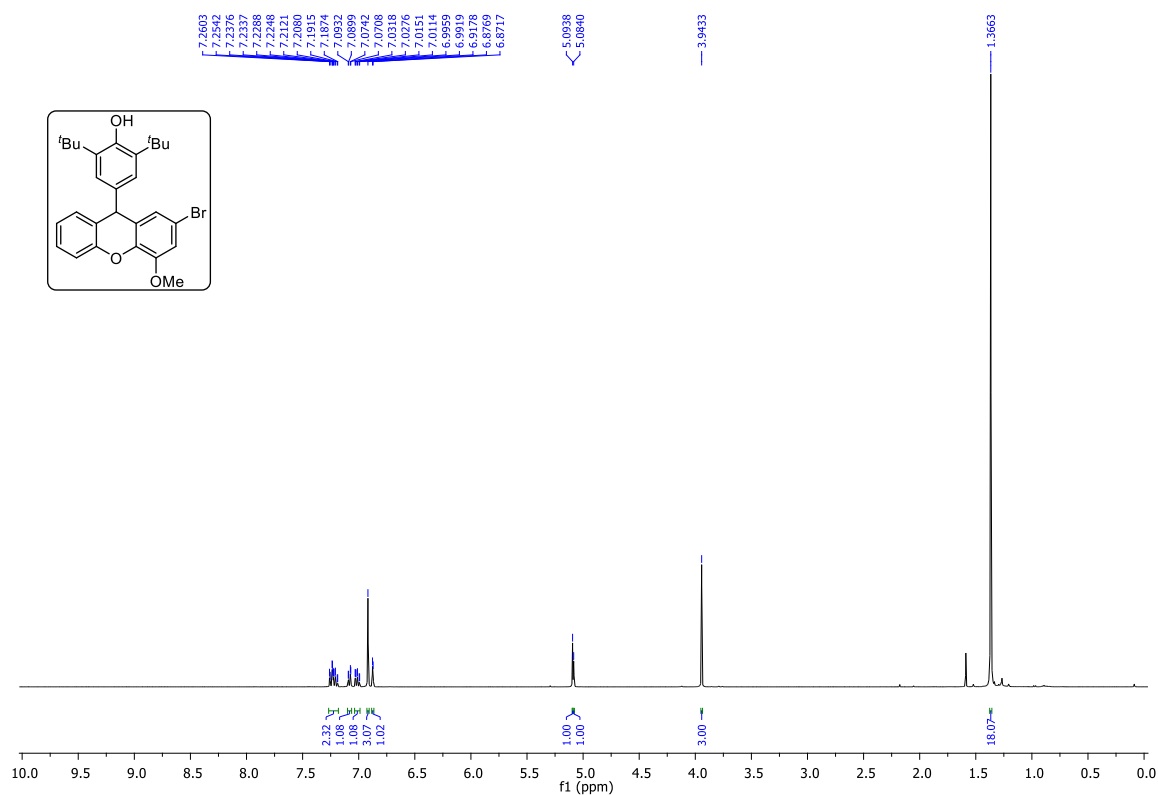

$^{13}\text{C}$   $\{^1\text{H}\}$  NMR (100 MHz,  $\text{CDCl}_3$ ) spectrum of **2o**

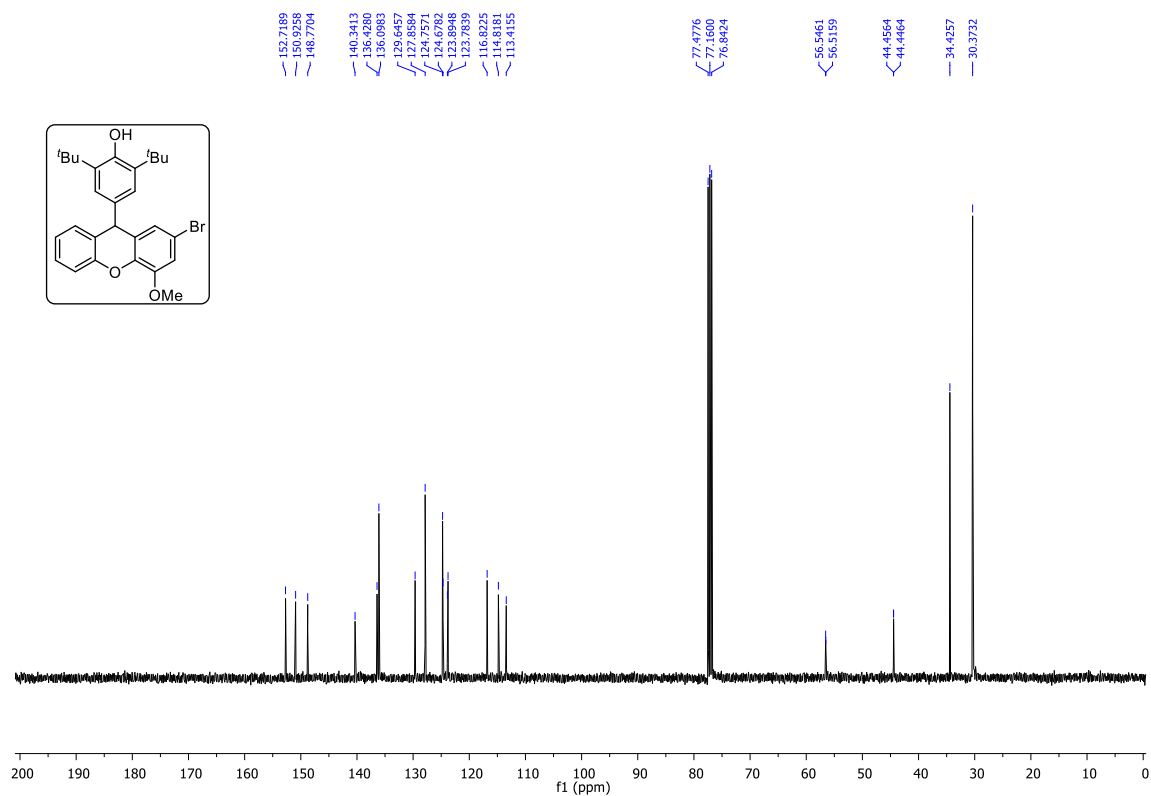



$^1\text{H}$  NMR (400 MHz,  $\text{CDCl}_3$ ) spectrum of **2p**

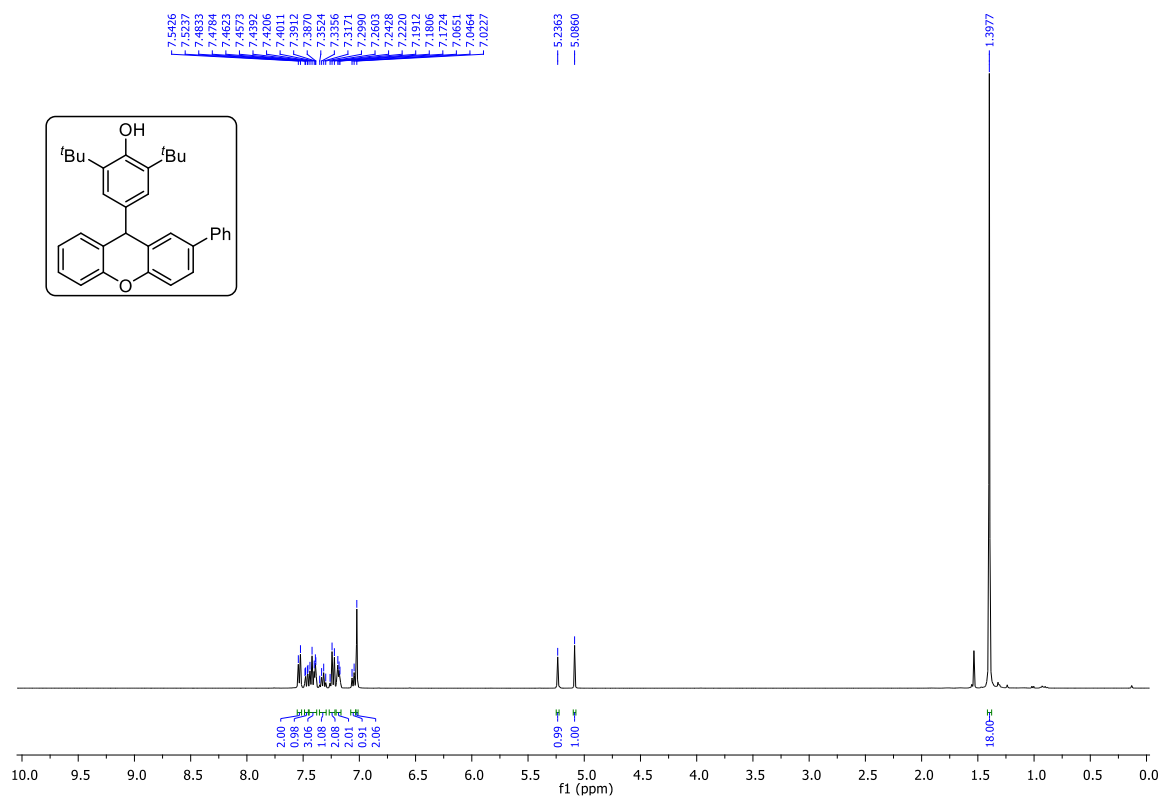

$^{13}\text{C}$   $\{^1\text{H}\}$  NMR (100 MHz,  $\text{CDCl}_3$ ) spectrum of **2p**

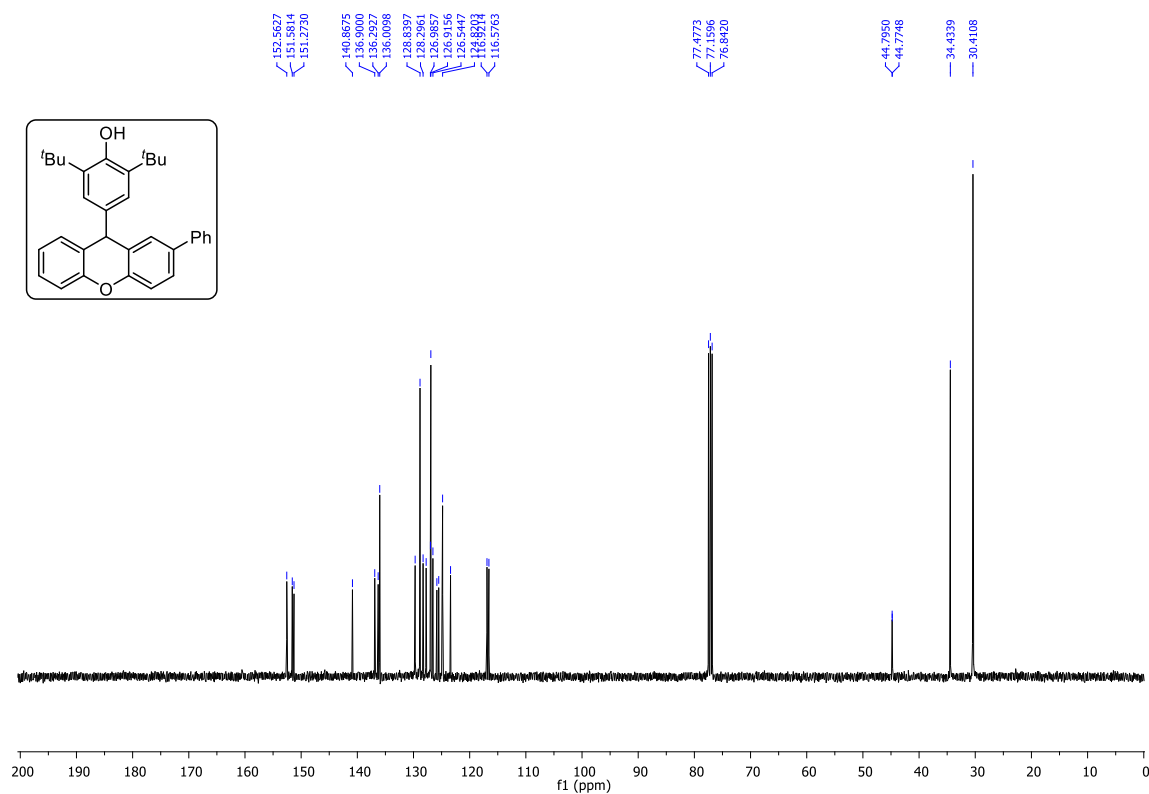

<sup>1</sup>H NMR (400 MHz, CDCl<sub>3</sub>) spectrum of **2q**

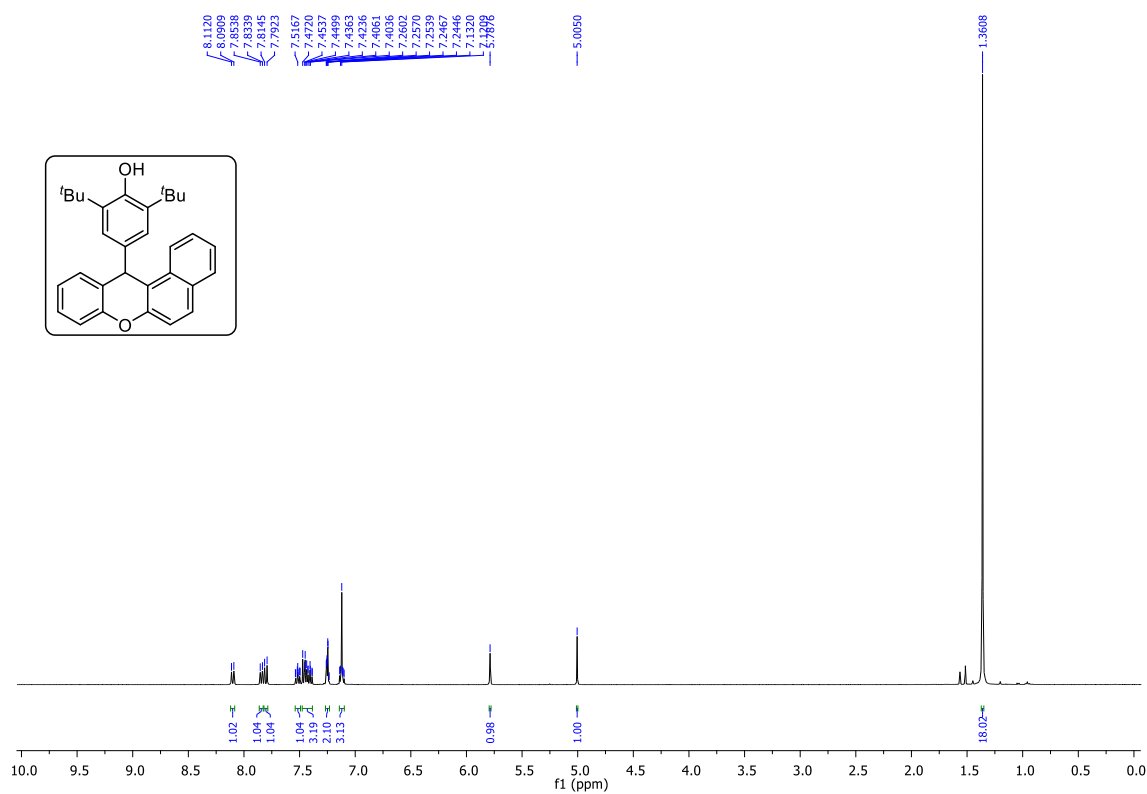

<sup>13</sup>C {<sup>1</sup>H} NMR (100 MHz, CDCl<sub>3</sub>) spectrum of **2q**

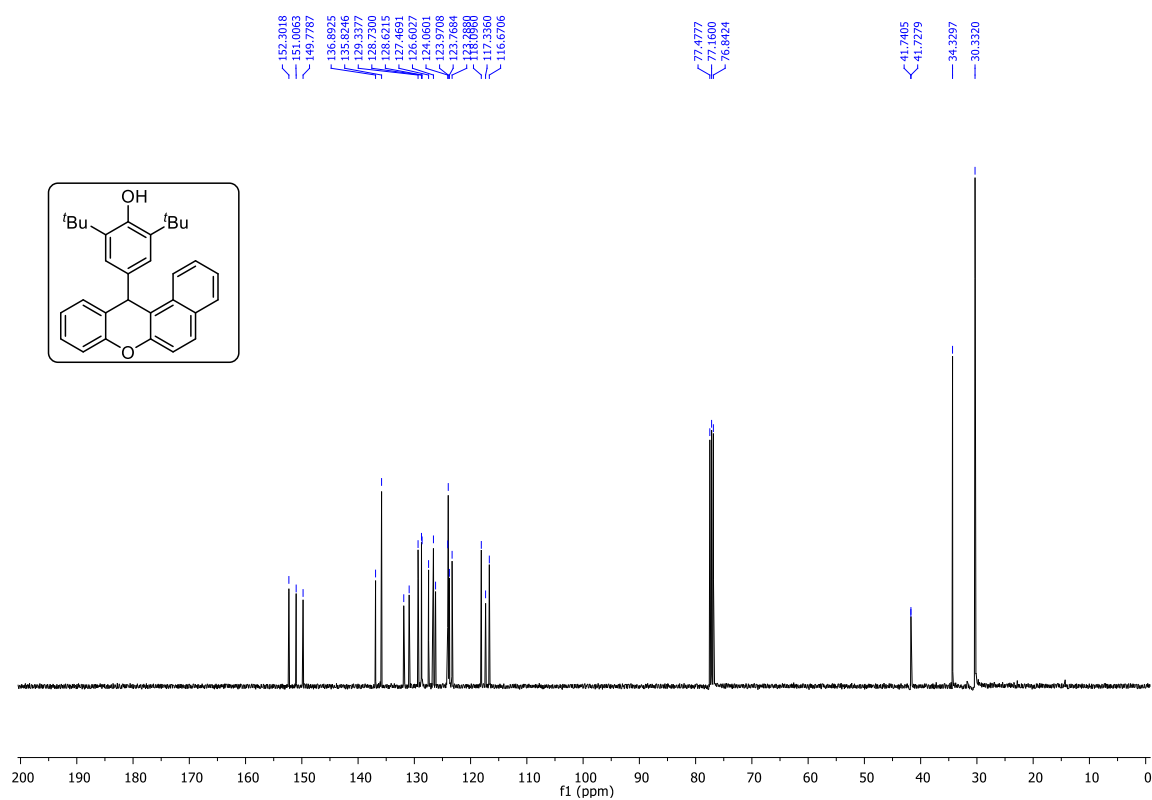

<sup>1</sup>H NMR (400 MHz, CDCl<sub>3</sub>) spectrum of **2r**

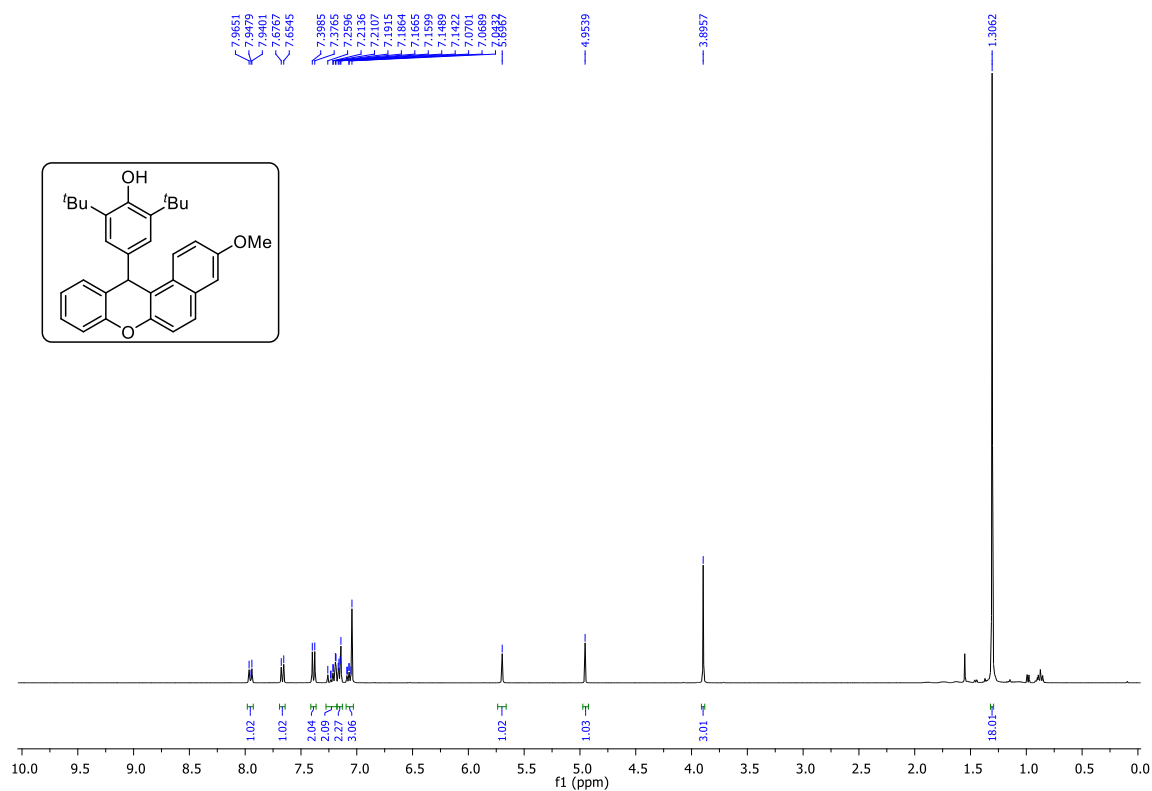

<sup>13</sup>C {<sup>1</sup>H} NMR (100 MHz, CDCl<sub>3</sub>) spectrum of **2r**

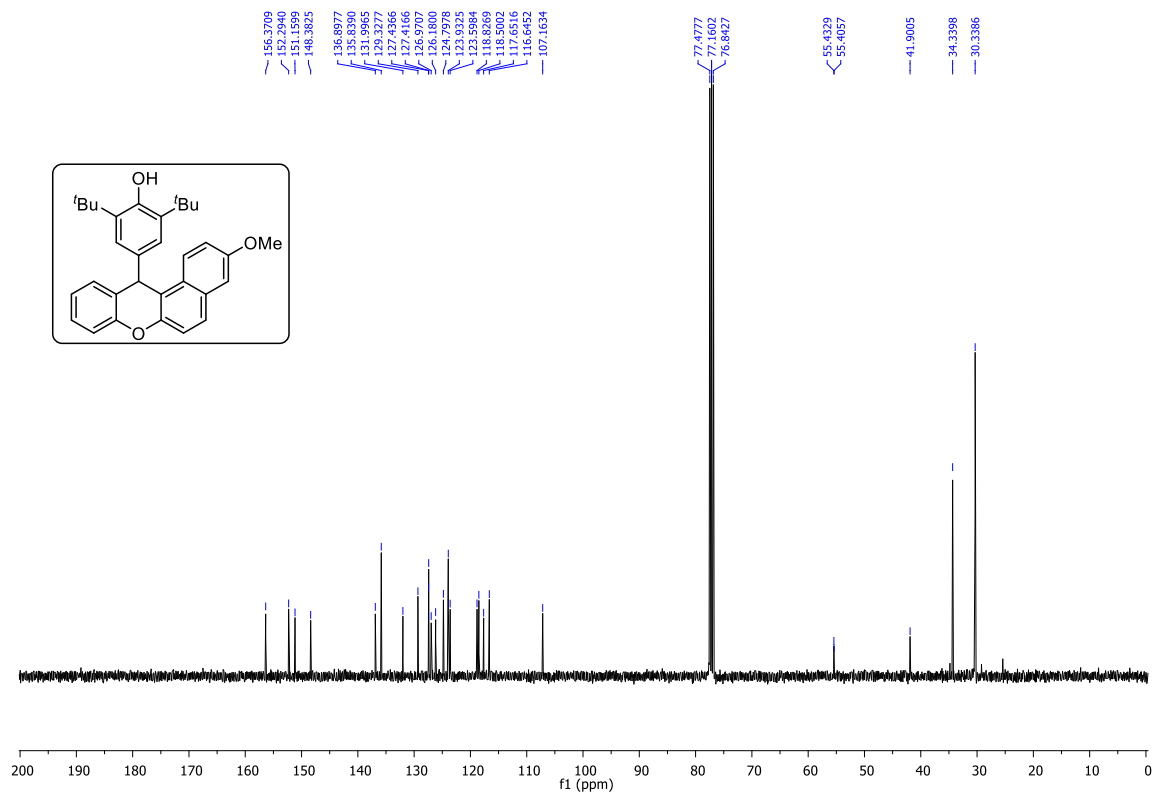

<sup>1</sup>H NMR (400 MHz, CDCl<sub>3</sub>) spectrum of **2s**

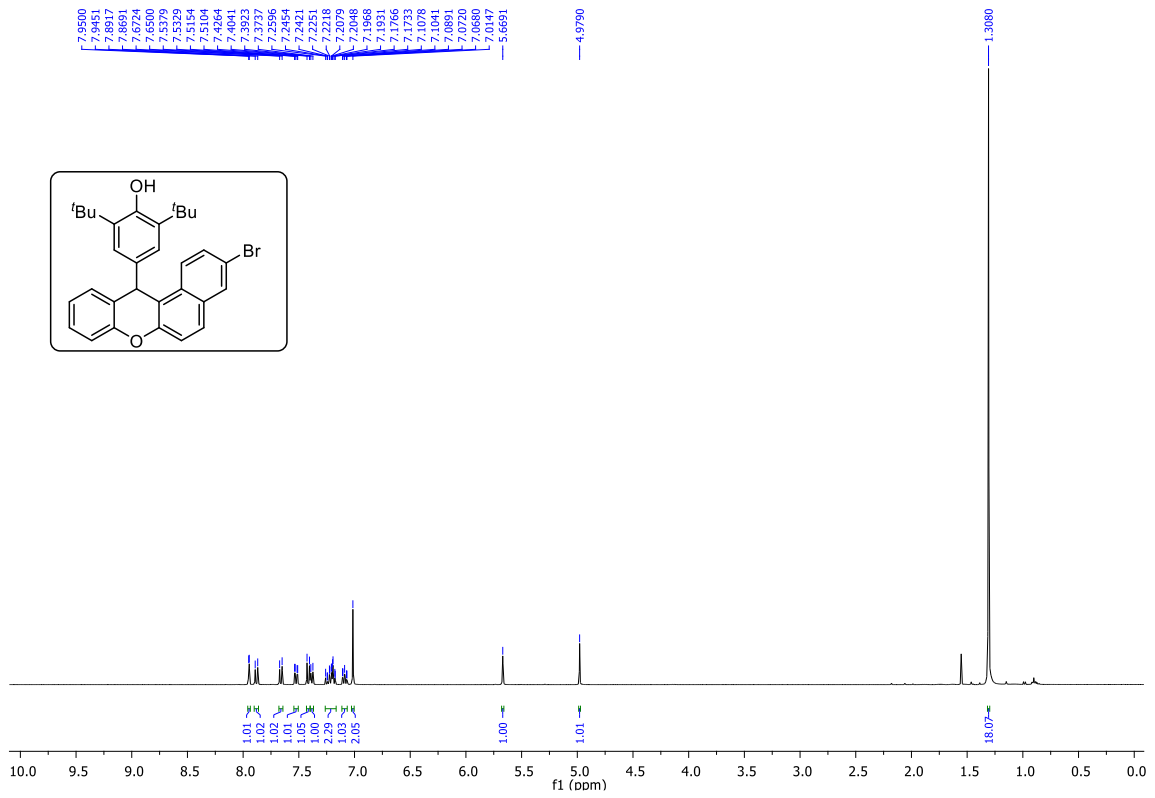

<sup>13</sup>C {<sup>1</sup>H} NMR (100 MHz, CDCl<sub>3</sub>) spectrum of **2s**

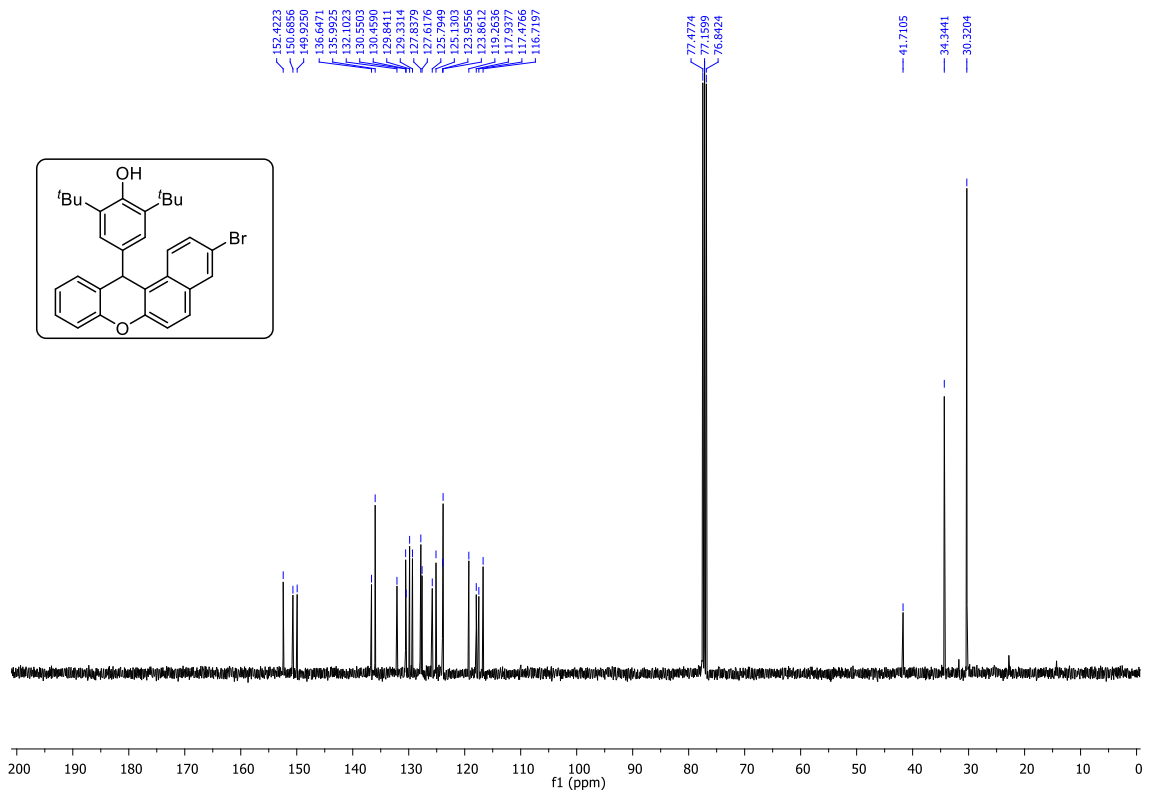

<sup>1</sup>H NMR (400 MHz, CDCl<sub>3</sub>) spectrum of **2t**

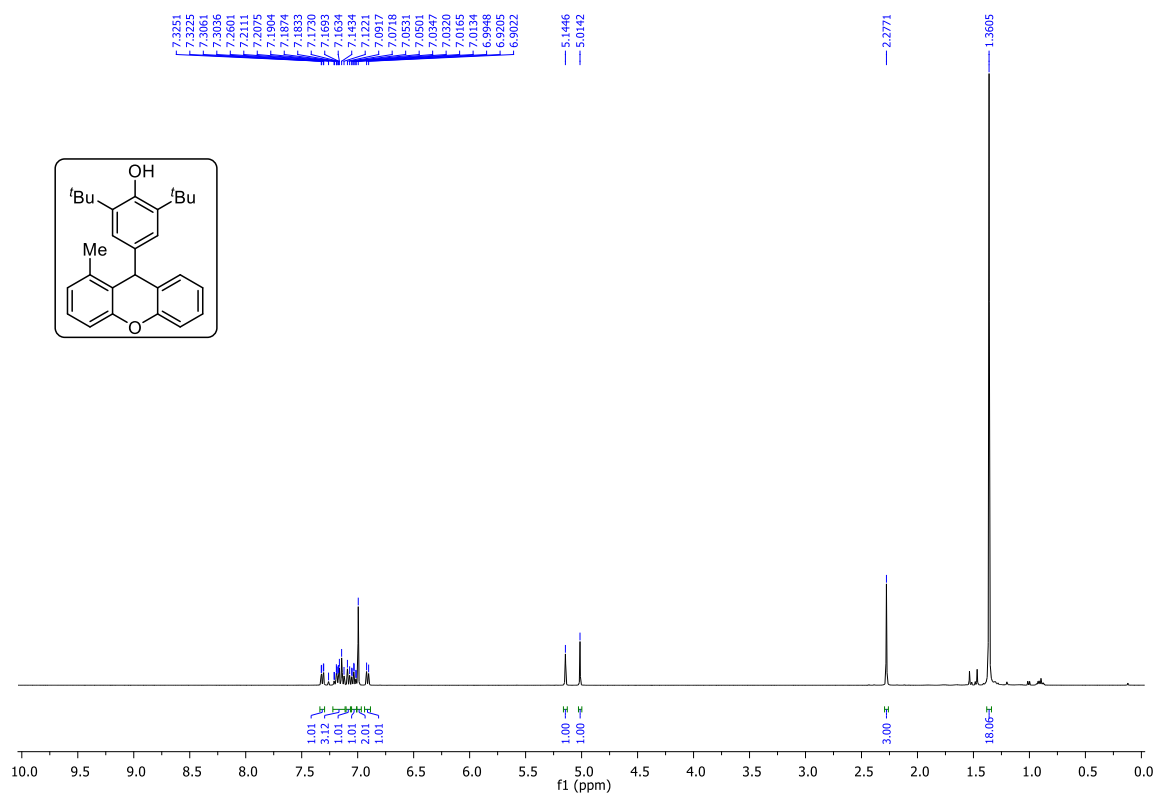

<sup>13</sup>C {<sup>1</sup>H} NMR (100 MHz, CDCl<sub>3</sub>) spectrum of **2t**

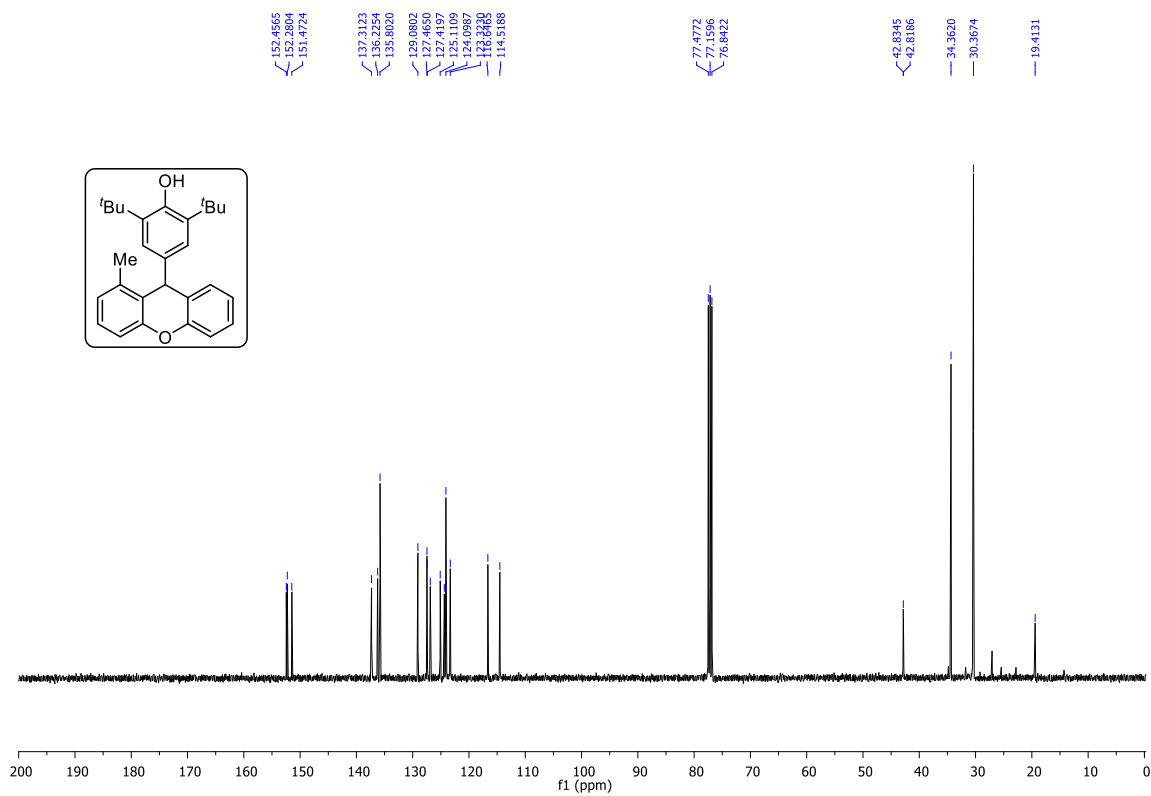

$^1\text{H}$  NMR (400 MHz,  $\text{CDCl}_3$ ) spectrum of **2u**

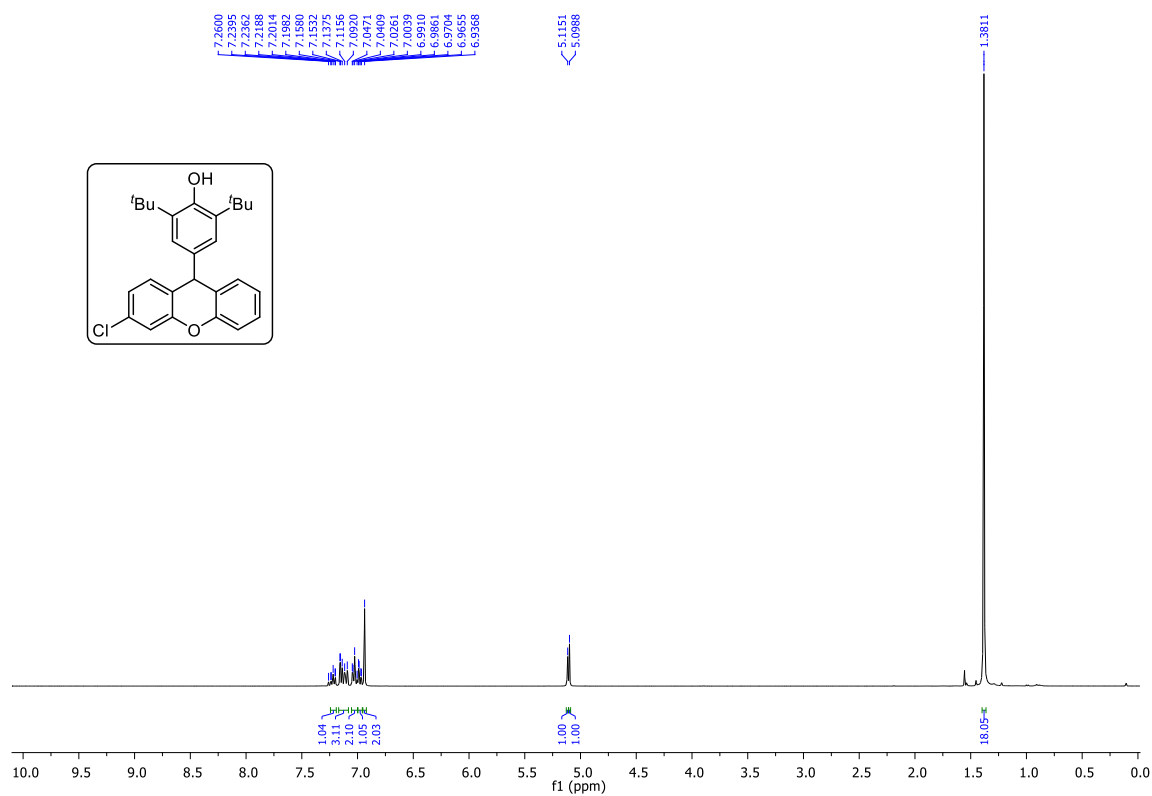

$^{13}\text{C}$  { $^1\text{H}$ } NMR (100 MHz,  $\text{CDCl}_3$ ) spectrum of **2u**

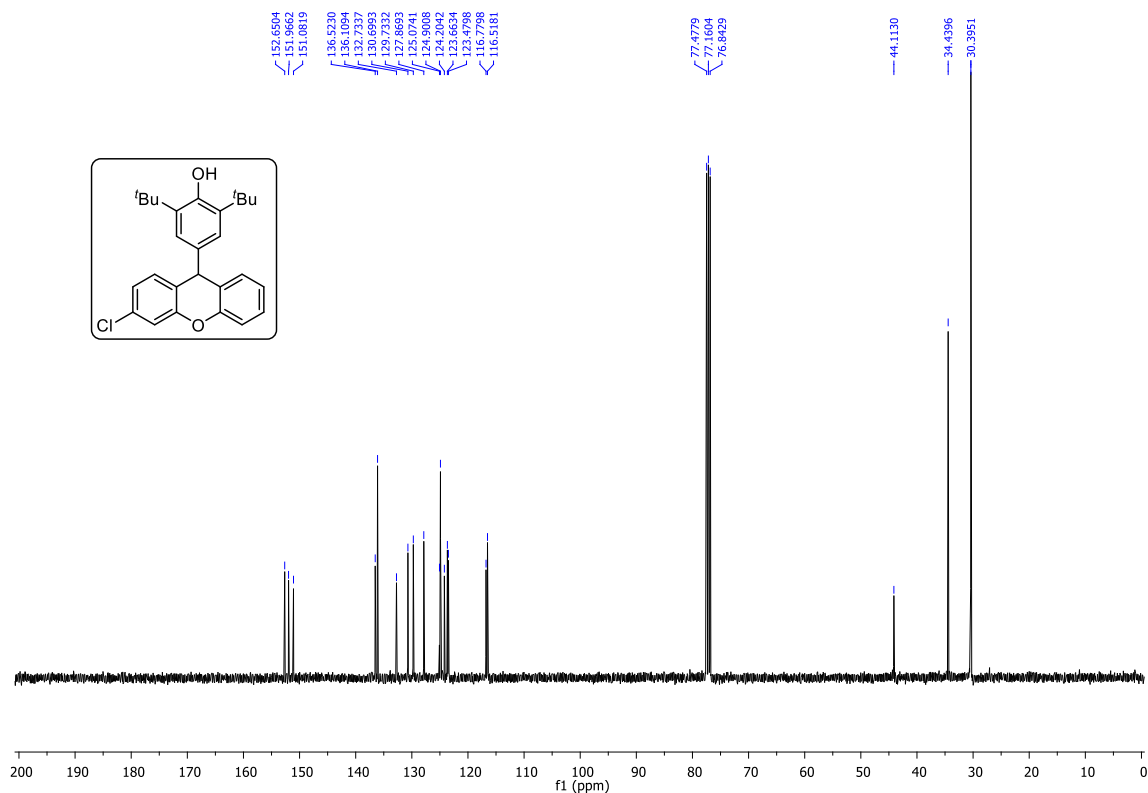

<sup>1</sup>H NMR (400 MHz, CDCl<sub>3</sub>) spectrum of **4a**

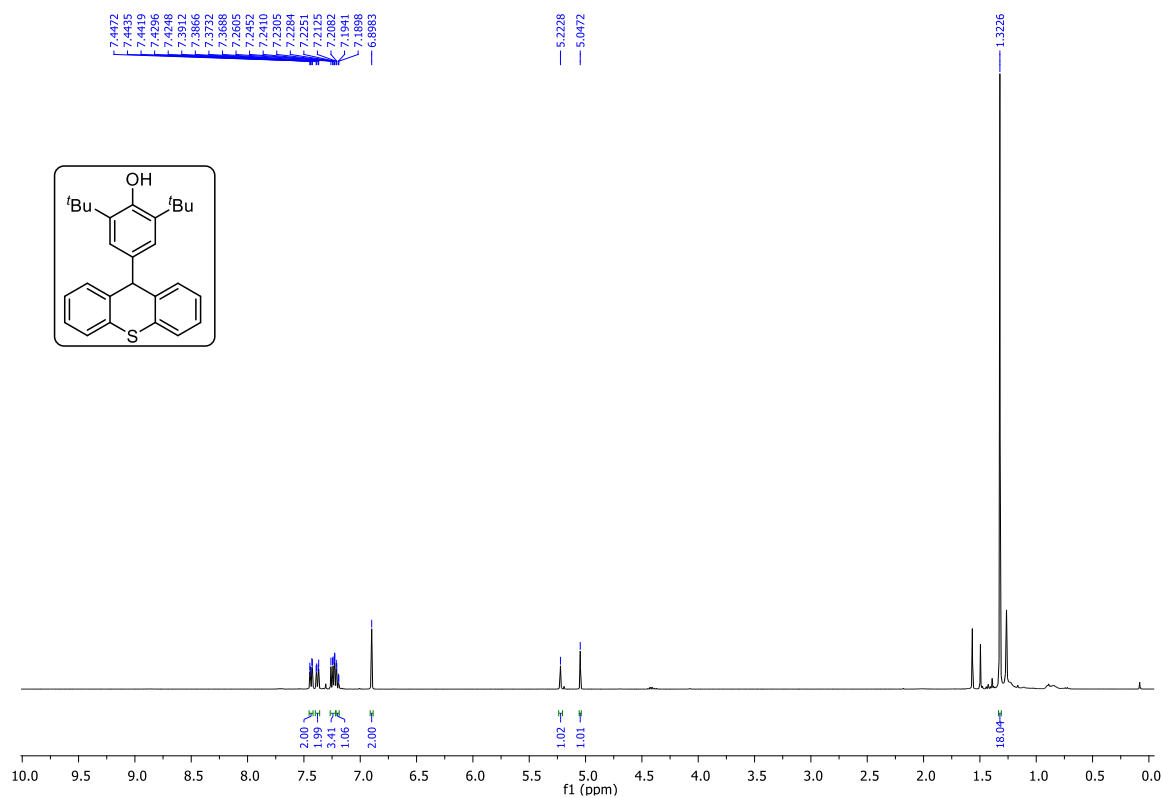

<sup>13</sup>C {<sup>1</sup>H} NMR (100 MHz, CDCl<sub>3</sub>) spectrum of **4a**

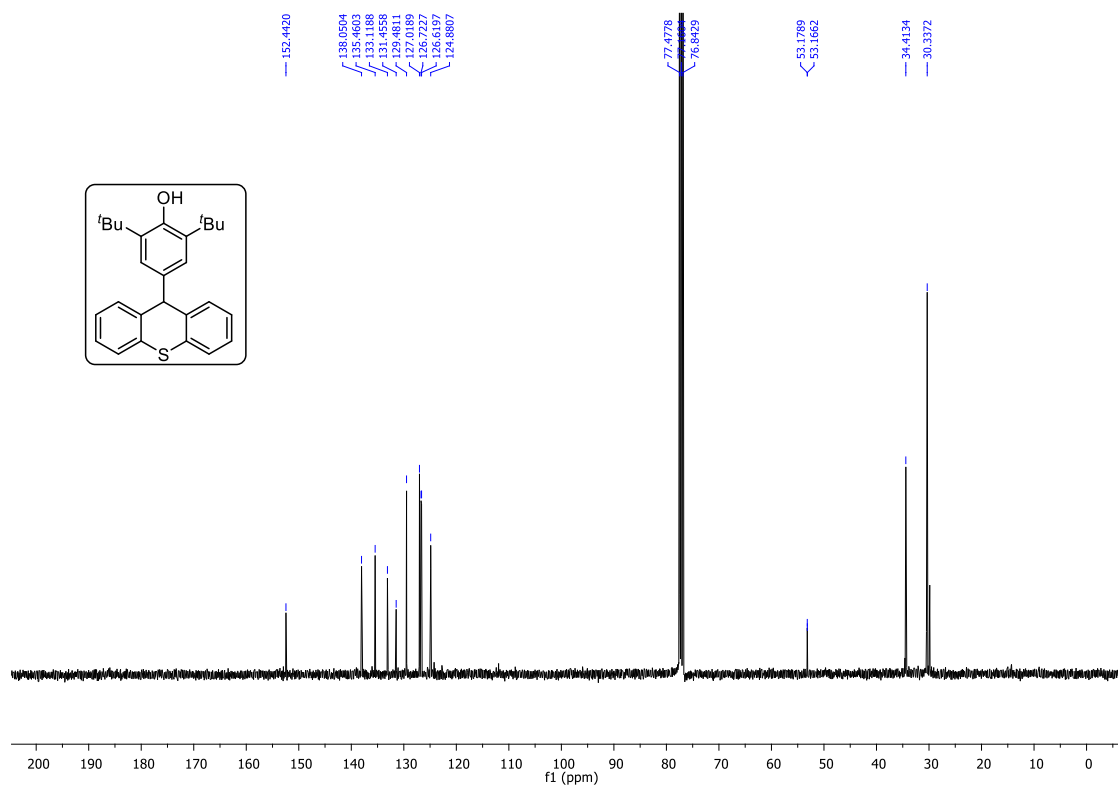

$^1\text{H}$  NMR (400 MHz,  $\text{CDCl}_3$ ) spectrum of **4b**

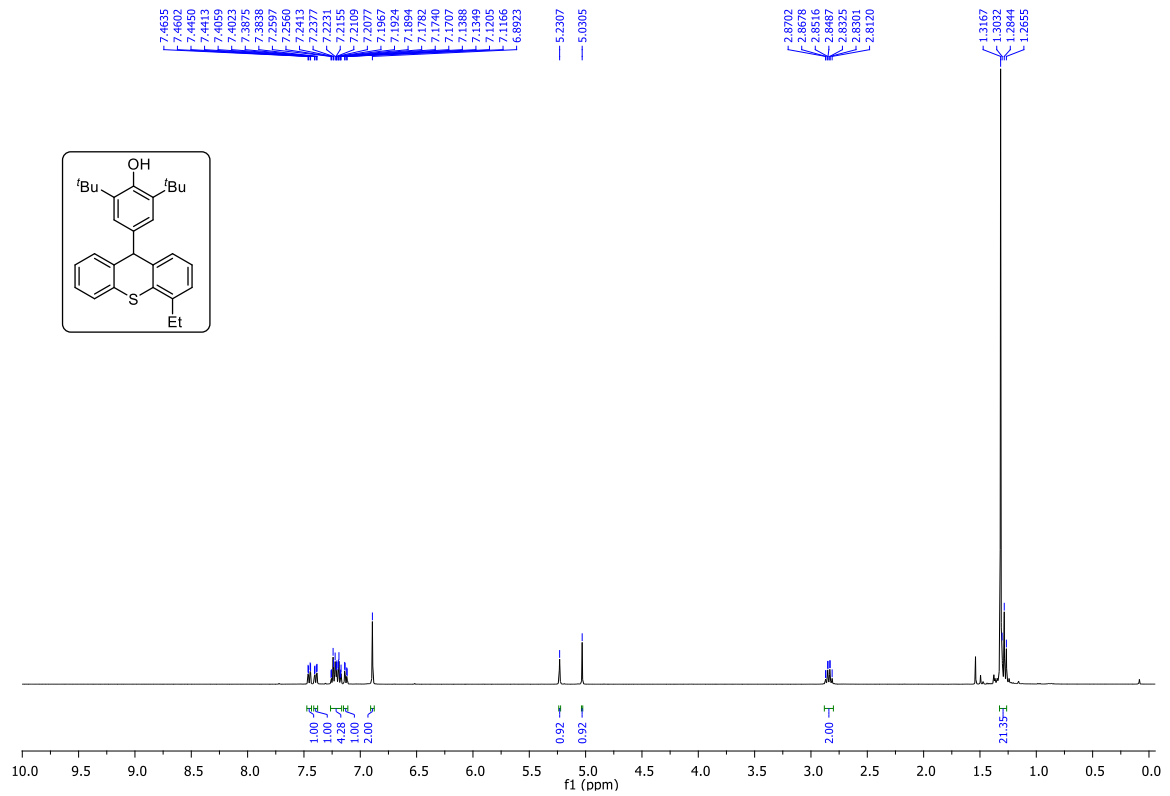

$^{13}\text{C}$   $\{^1\text{H}\}$  NMR (100 MHz,  $\text{CDCl}_3$ ) spectrum of **4b**

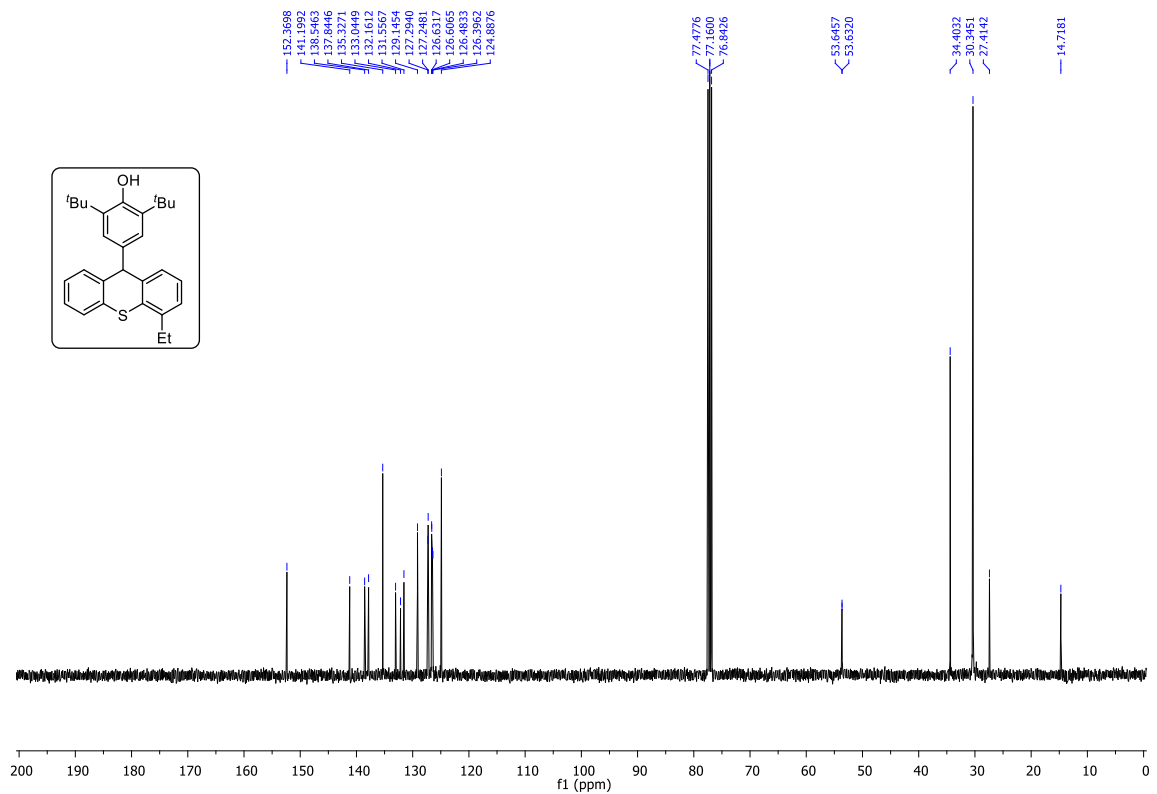



$^1\text{H}$  NMR (400 MHz,  $\text{CDCl}_3$ ) spectrum of **4c**

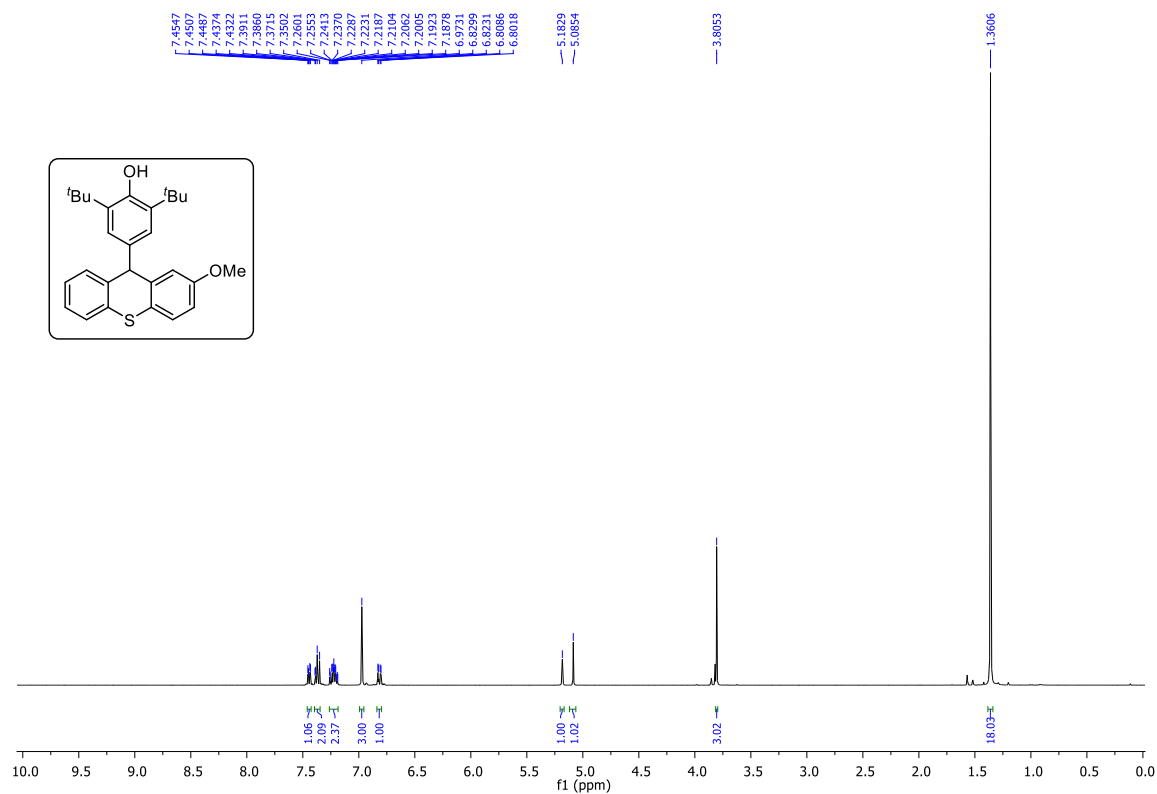

$^{13}\text{C}$   $\{^1\text{H}\}$  NMR (100 MHz,  $\text{CDCl}_3$ ) spectrum of **4c**

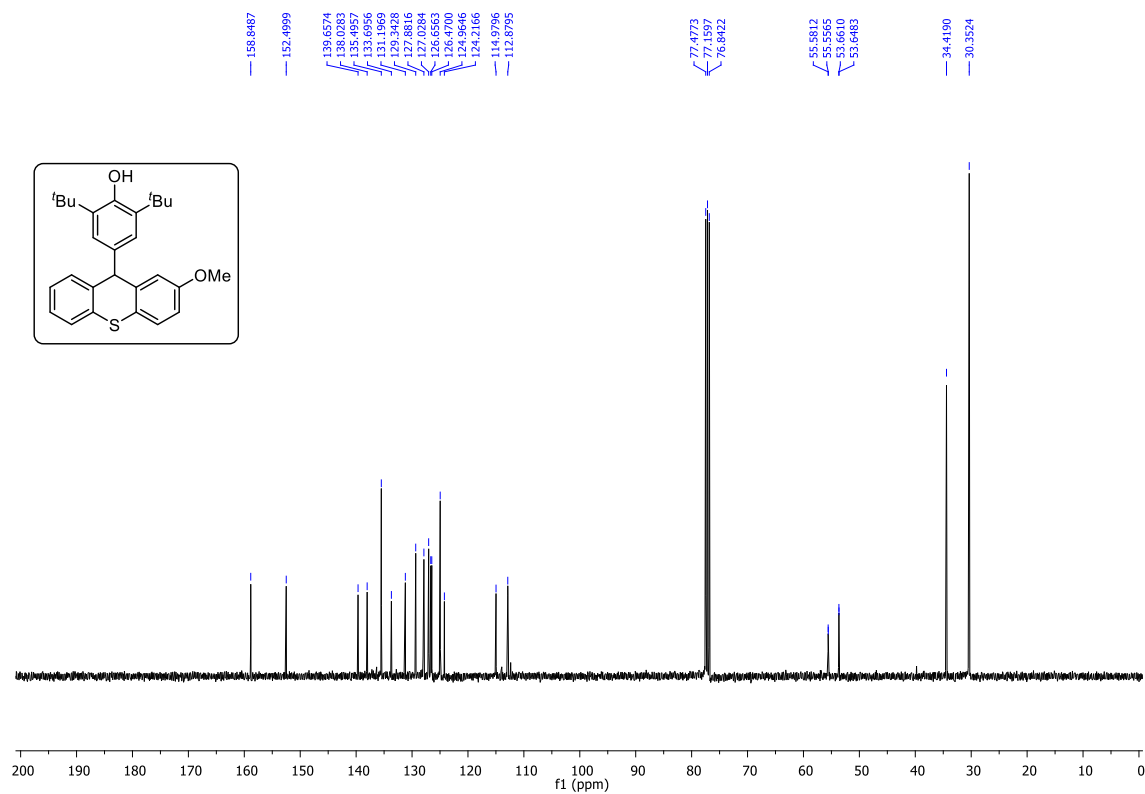

$^1\text{H}$  NMR (400 MHz,  $\text{CDCl}_3$ ) spectrum of **4d**

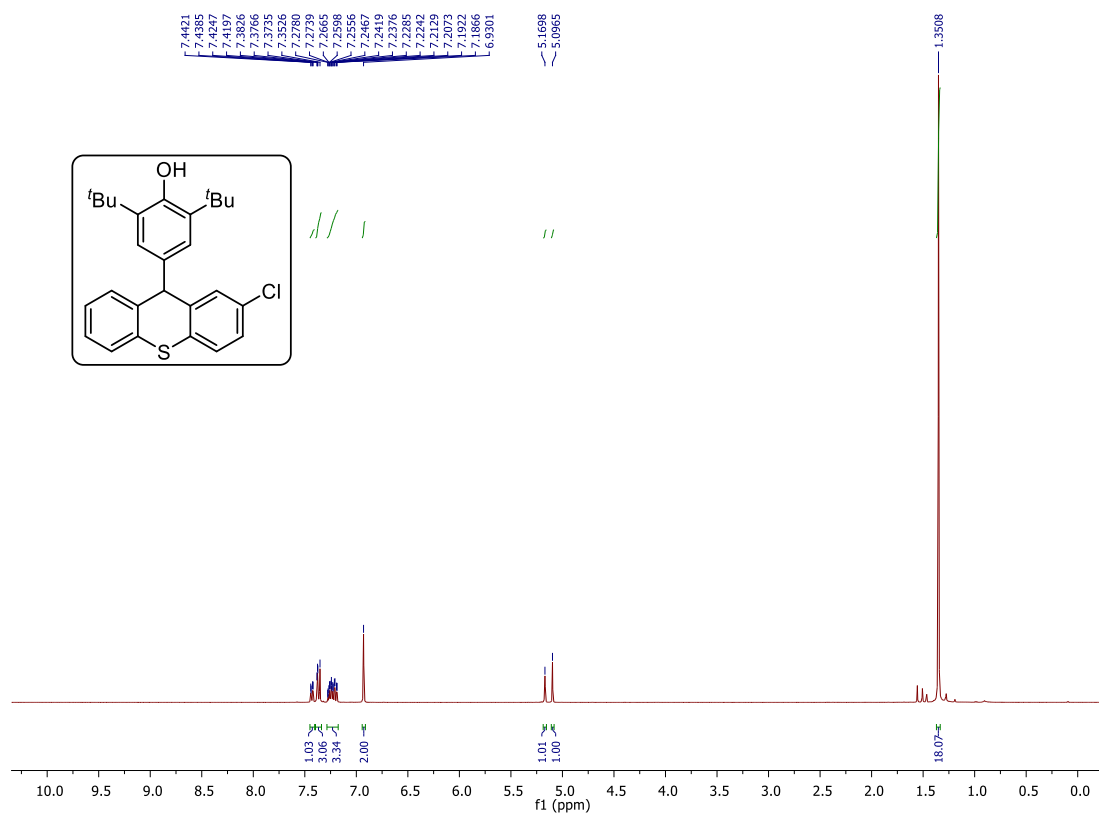

$^{13}\text{C}$  { $^1\text{H}$ } NMR (100 MHz,  $\text{CDCl}_3$ ) spectrum of **4d**

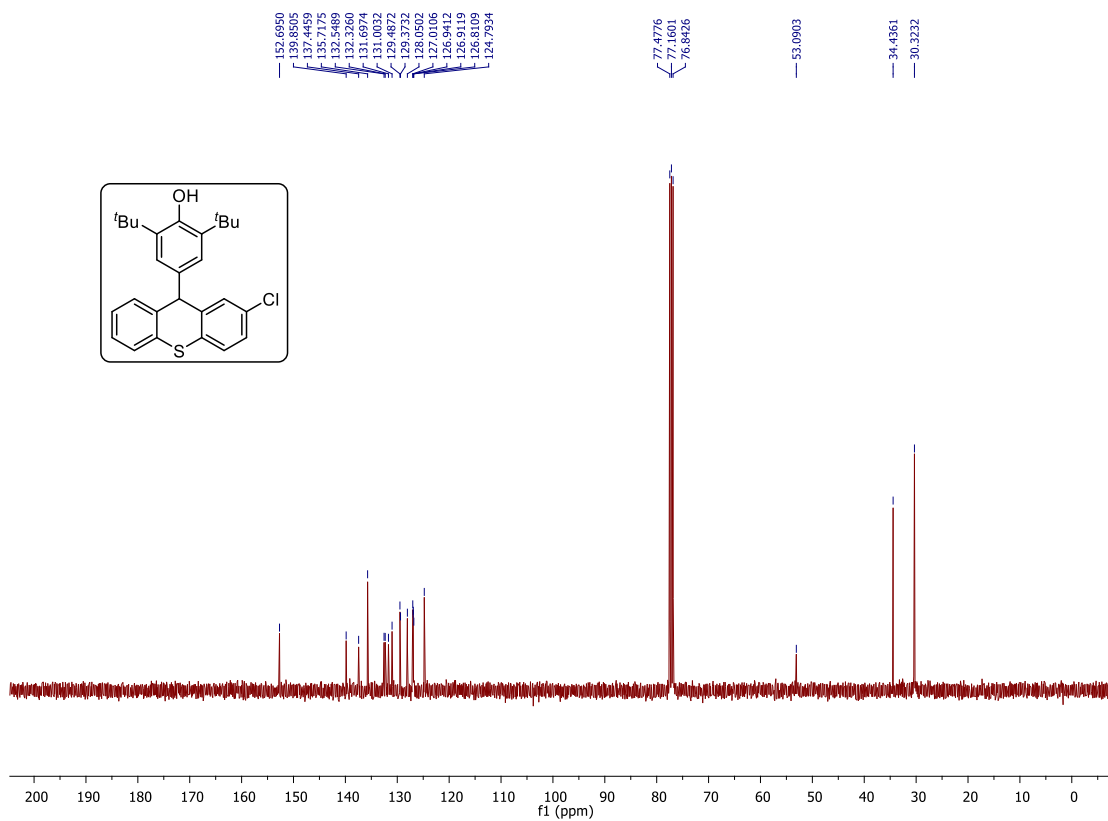

<sup>1</sup>H NMR (400 MHz, CDCl<sub>3</sub>) spectrum of **4e**

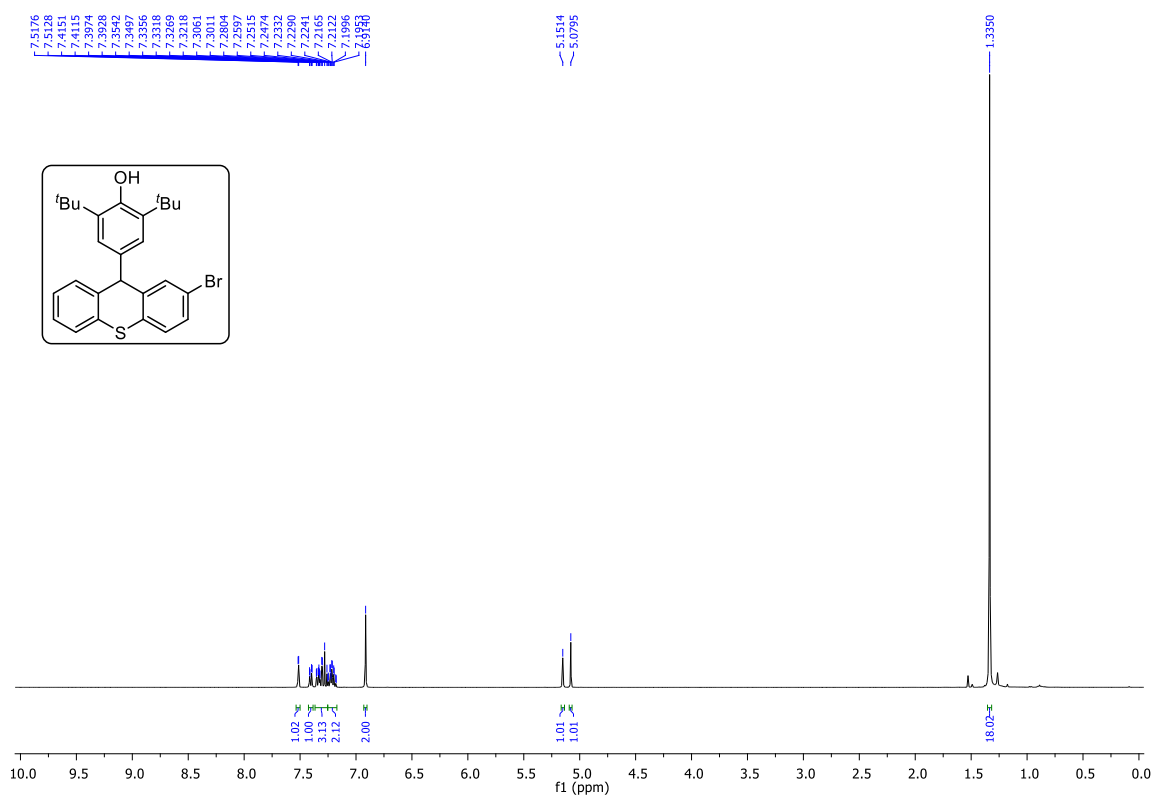

<sup>13</sup>C {<sup>1</sup>H} NMR (100 MHz, CDCl<sub>3</sub>) spectrum of **4e**

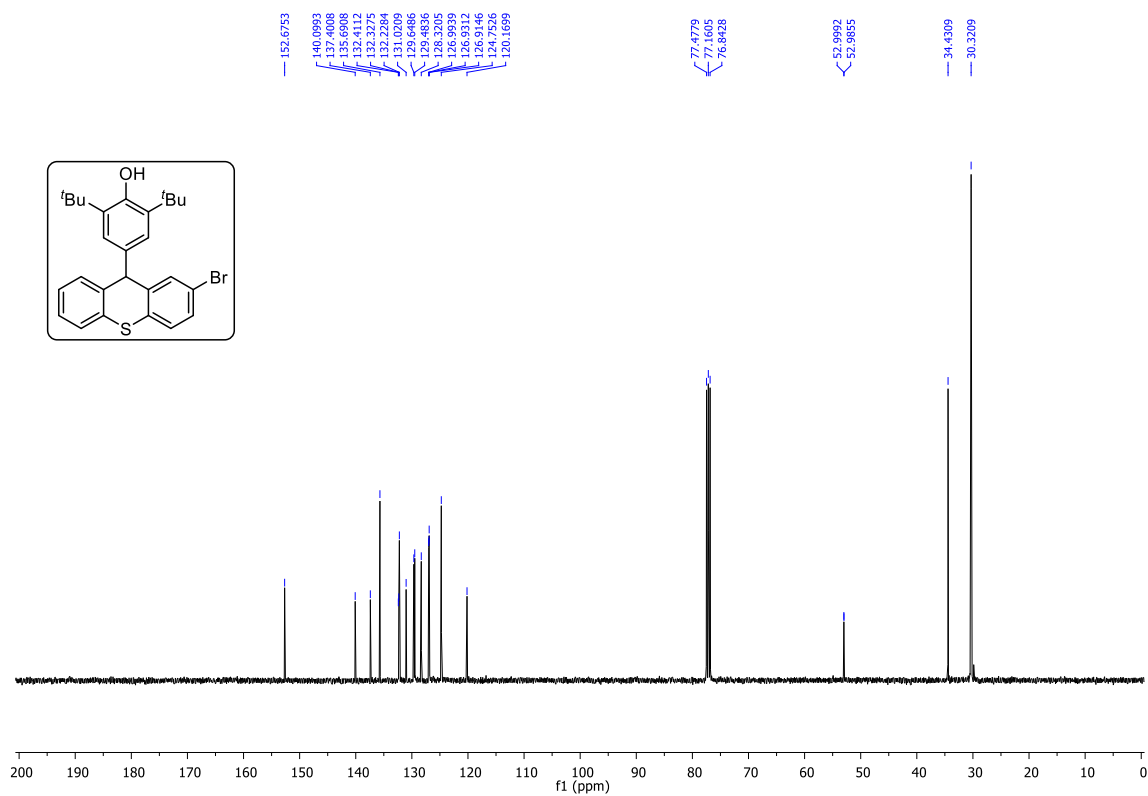

<sup>1</sup>H NMR (400 MHz, CDCl<sub>3</sub>) spectrum of **4f**

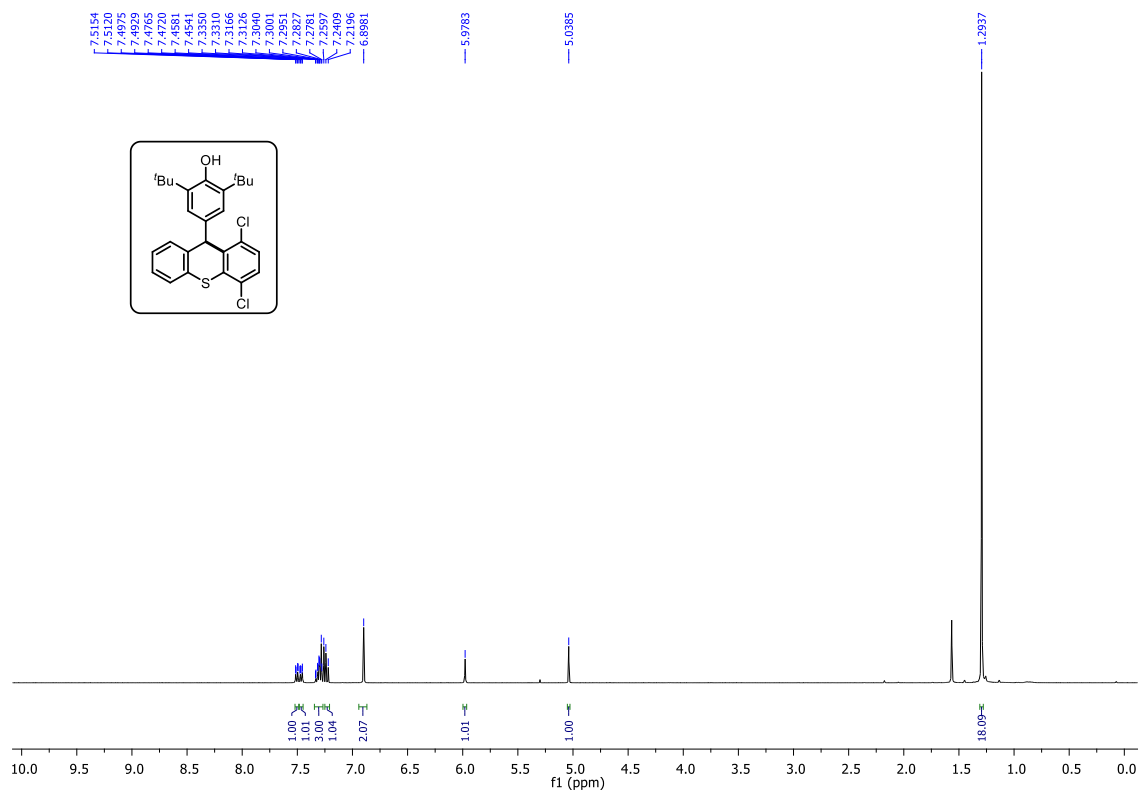

<sup>13</sup>C {<sup>1</sup>H} NMR (100 MHz, CDCl<sub>3</sub>) spectrum of **4f**

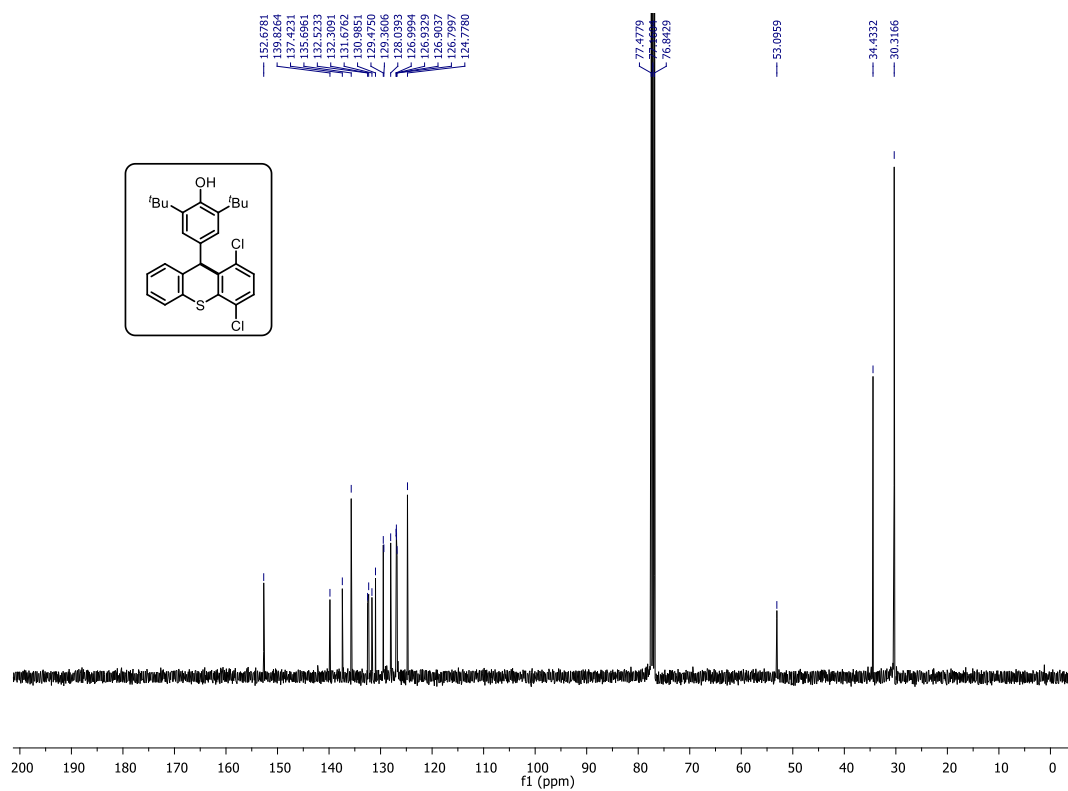

<sup>1</sup>H NMR (400 MHz, CDCl<sub>3</sub>) spectrum of **4g**

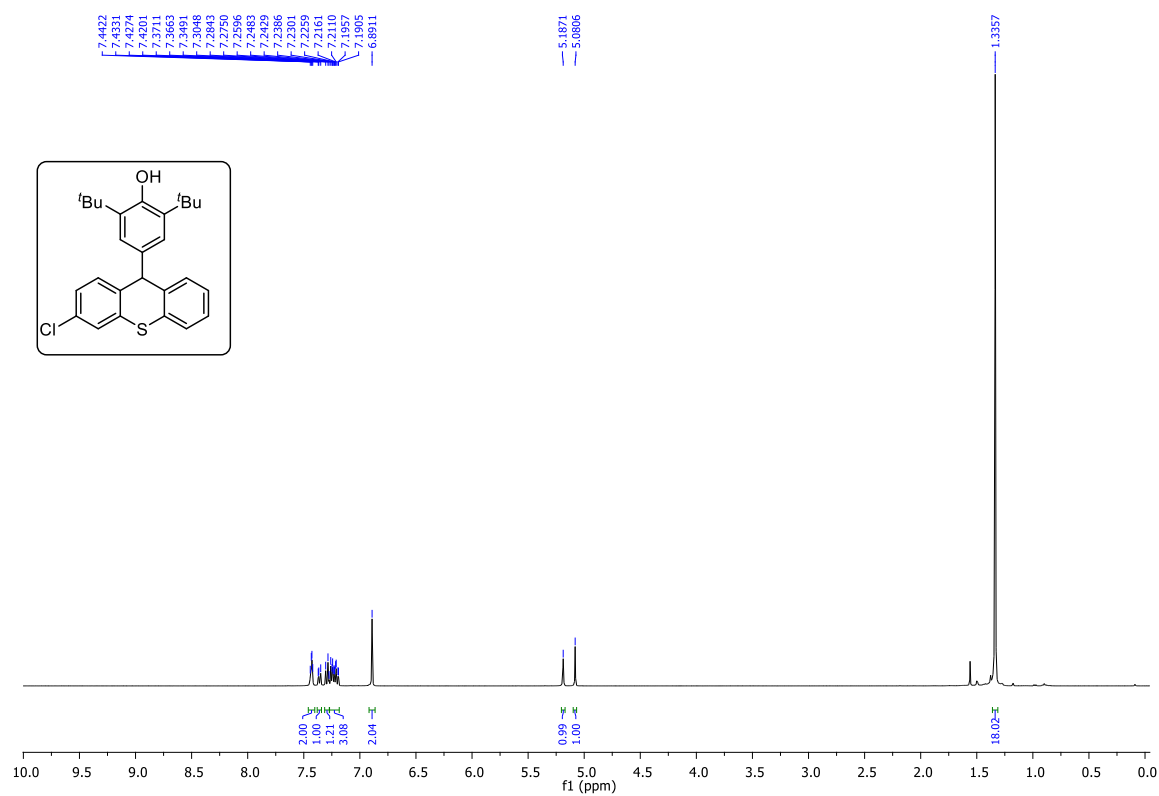

<sup>13</sup>C {<sup>1</sup>H} NMR (100 MHz, CDCl<sub>3</sub>) spectrum of **4g**

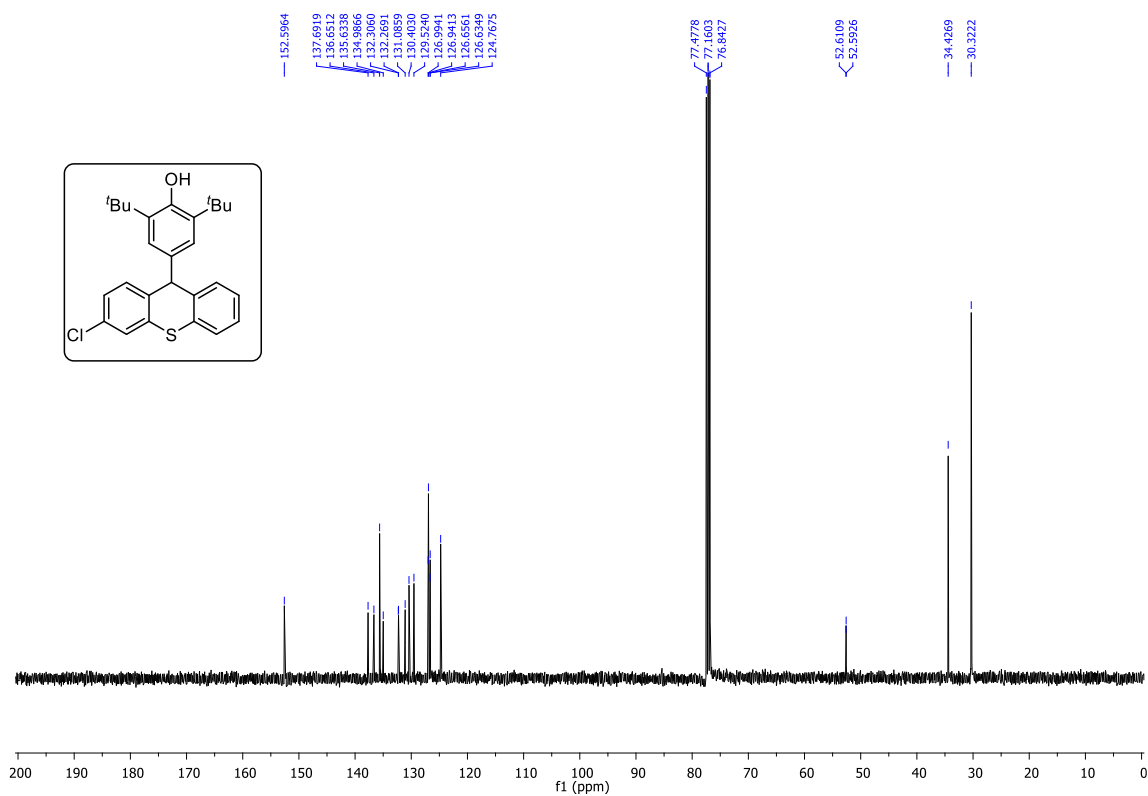

<sup>1</sup>H NMR (400 MHz, CDCl<sub>3</sub>) spectrum of **4h**

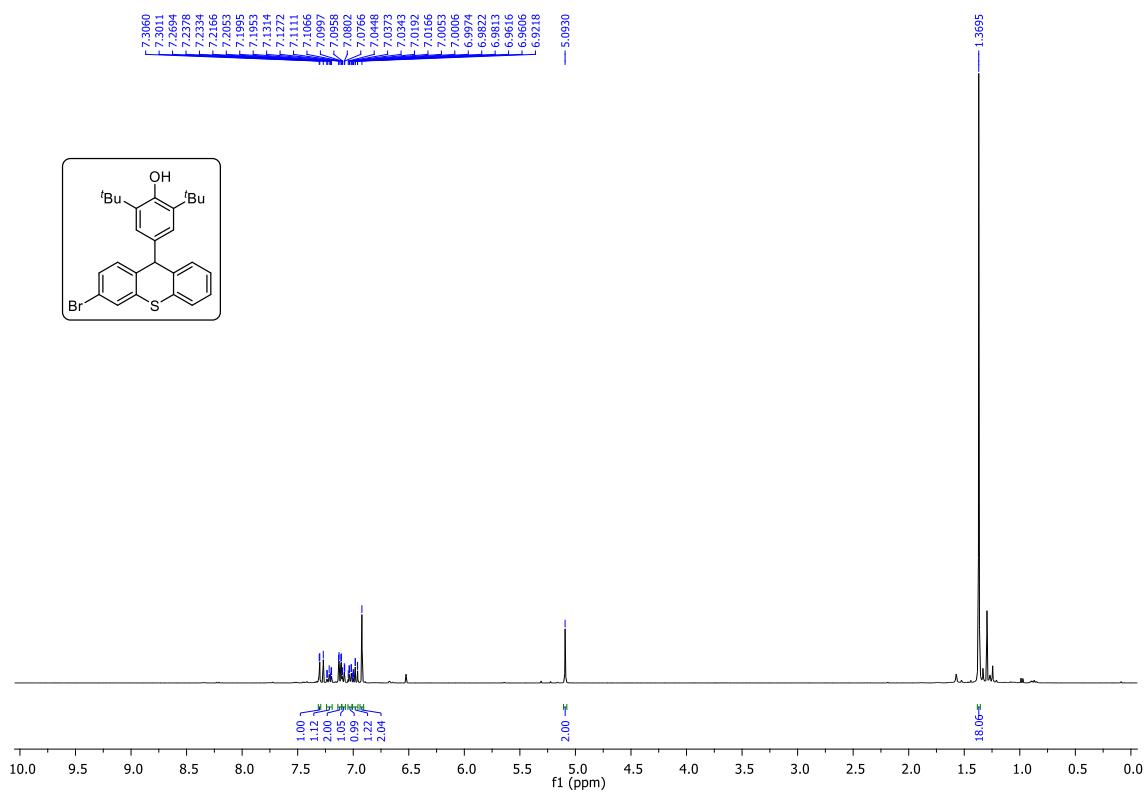

<sup>13</sup>C {<sup>1</sup>H} NMR (100 MHz, CDCl<sub>3</sub>) spectrum of **4h**

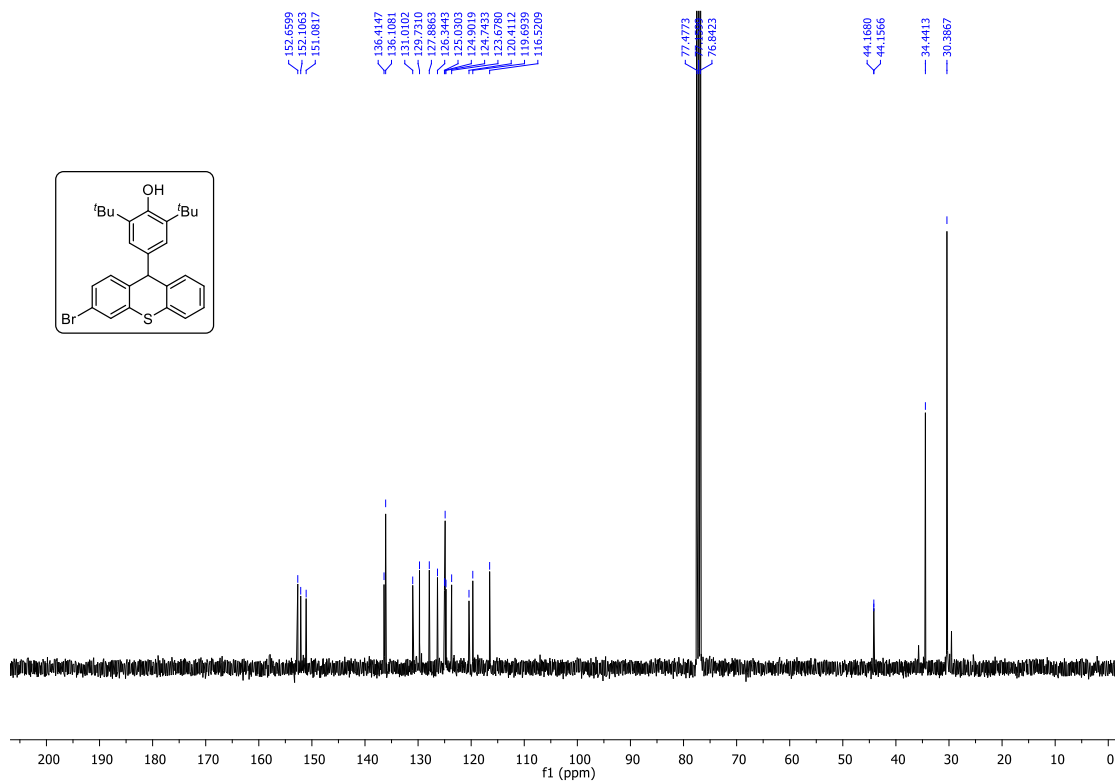

<sup>1</sup>H NMR (400 MHz, CDCl<sub>3</sub>) spectrum of **4i**

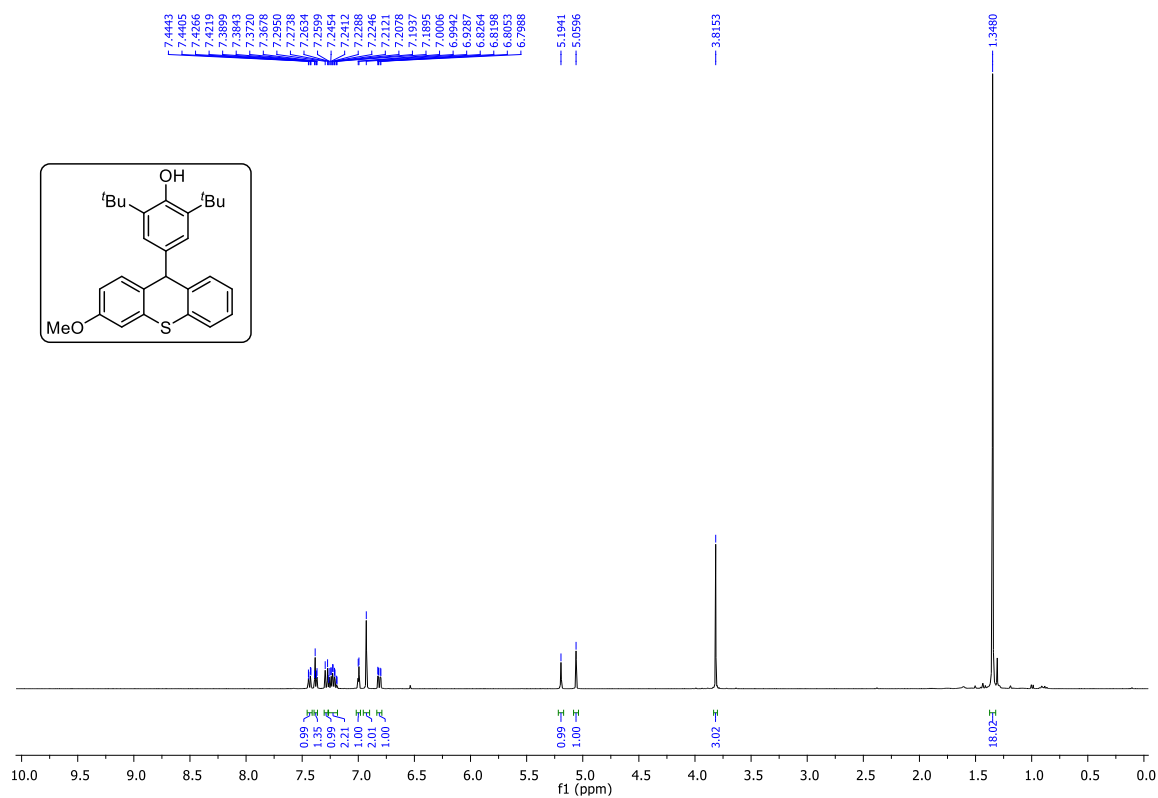

<sup>13</sup>C {<sup>1</sup>H} NMR (100 MHz, CDCl<sub>3</sub>) spectrum of **4i**

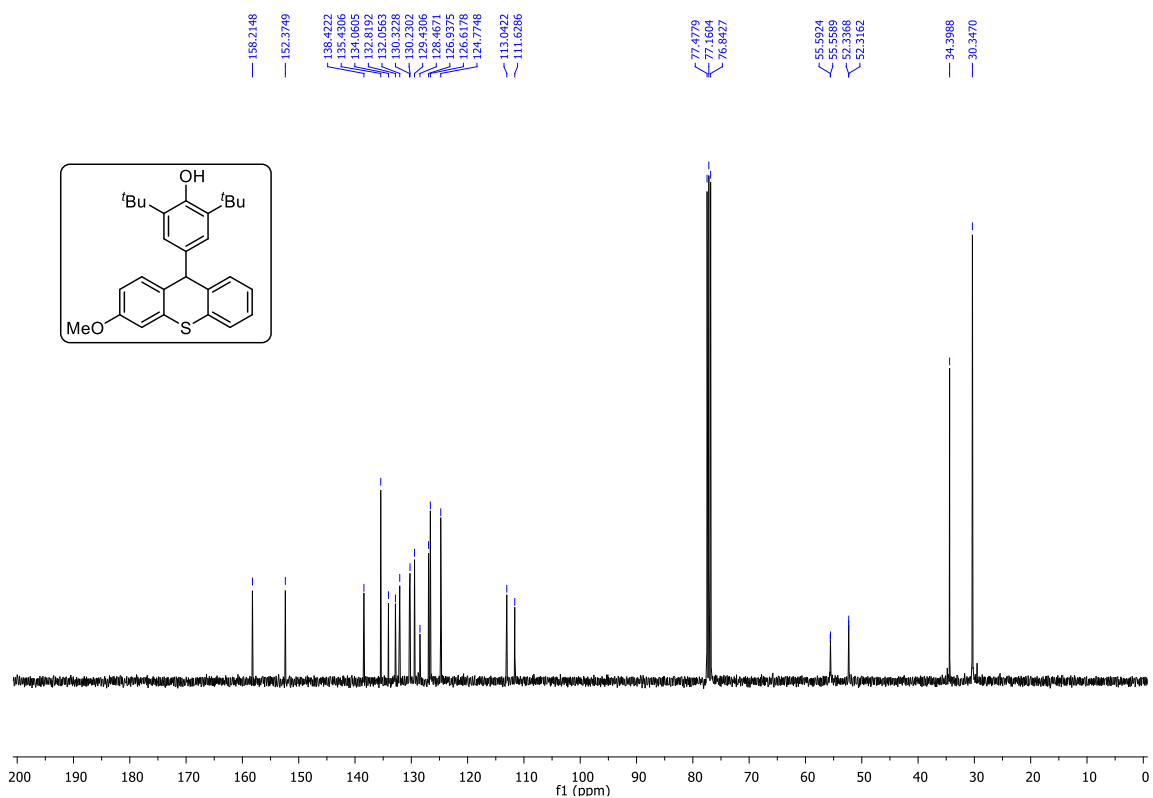

<sup>1</sup>H NMR (400 MHz, CDCl<sub>3</sub>) spectrum of **4j**

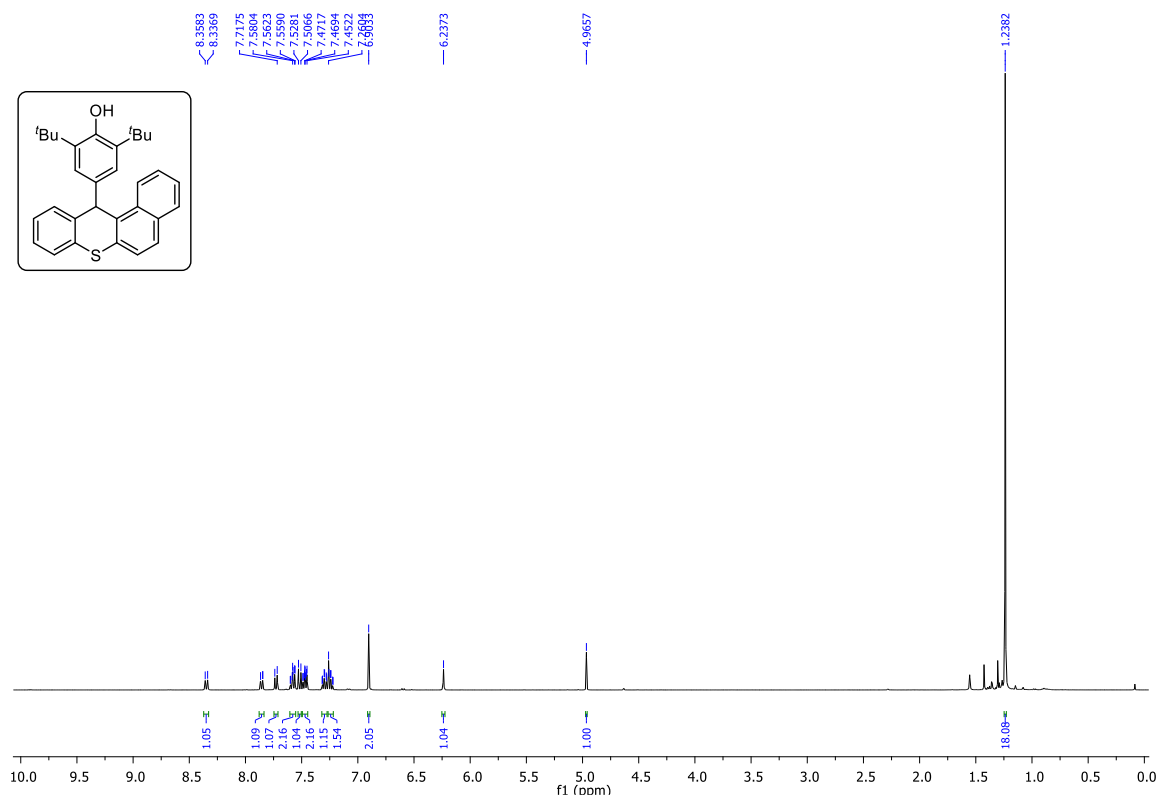

<sup>13</sup>C {<sup>1</sup>H} NMR (100 MHz, CDCl<sub>3</sub>) spectrum of **4j**

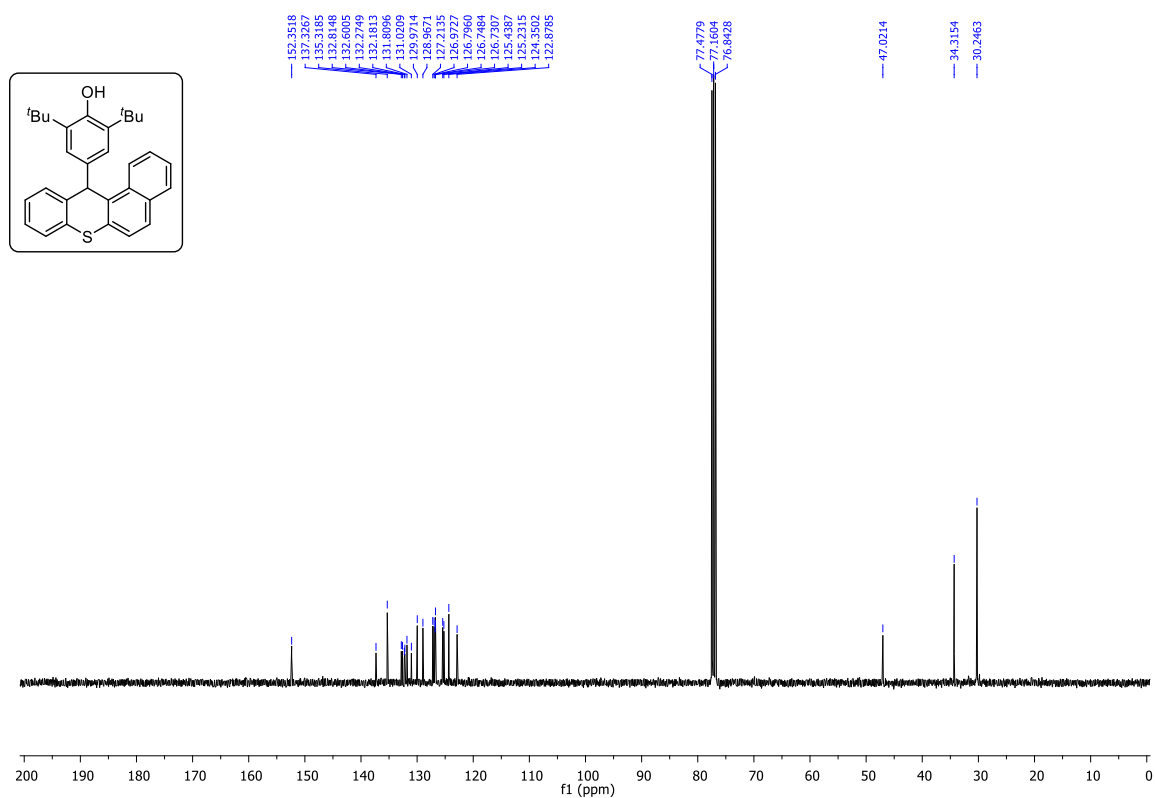



<sup>1</sup>H NMR (400 MHz, CDCl<sub>3</sub>) spectrum of **6a**

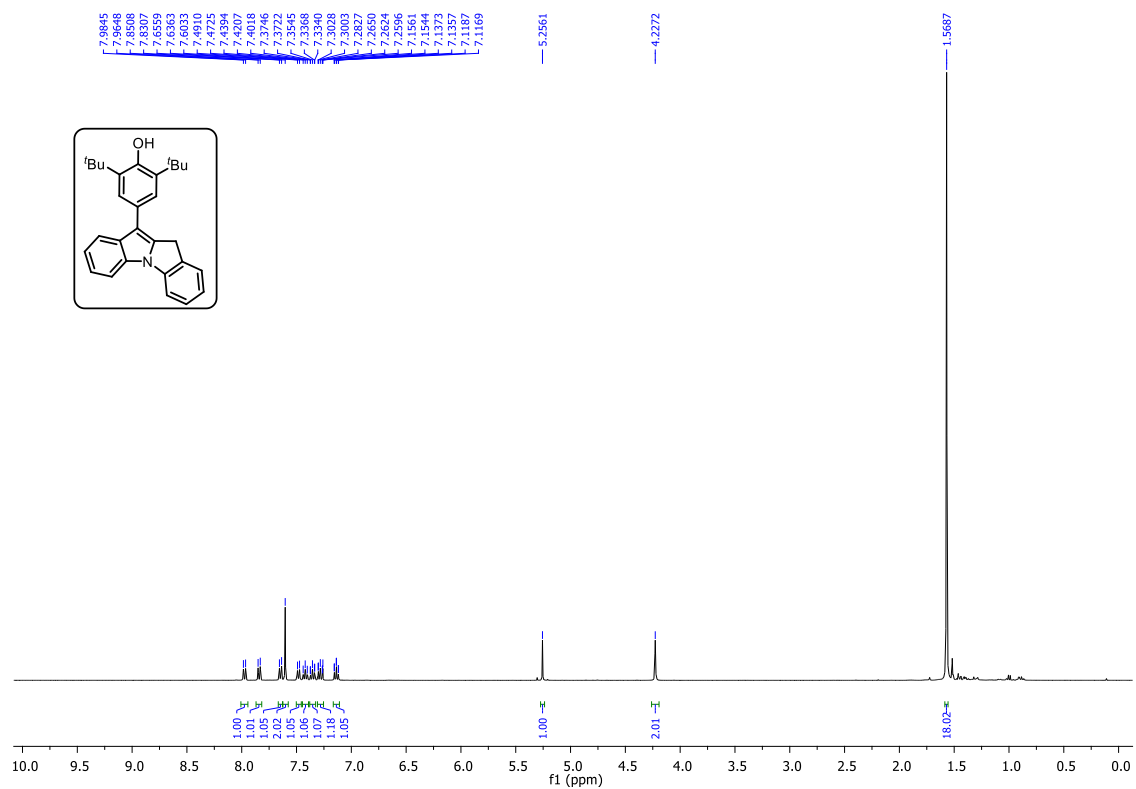

<sup>13</sup>C NMR (100 MHz, CDCl<sub>3</sub>) spectrum of **6a**

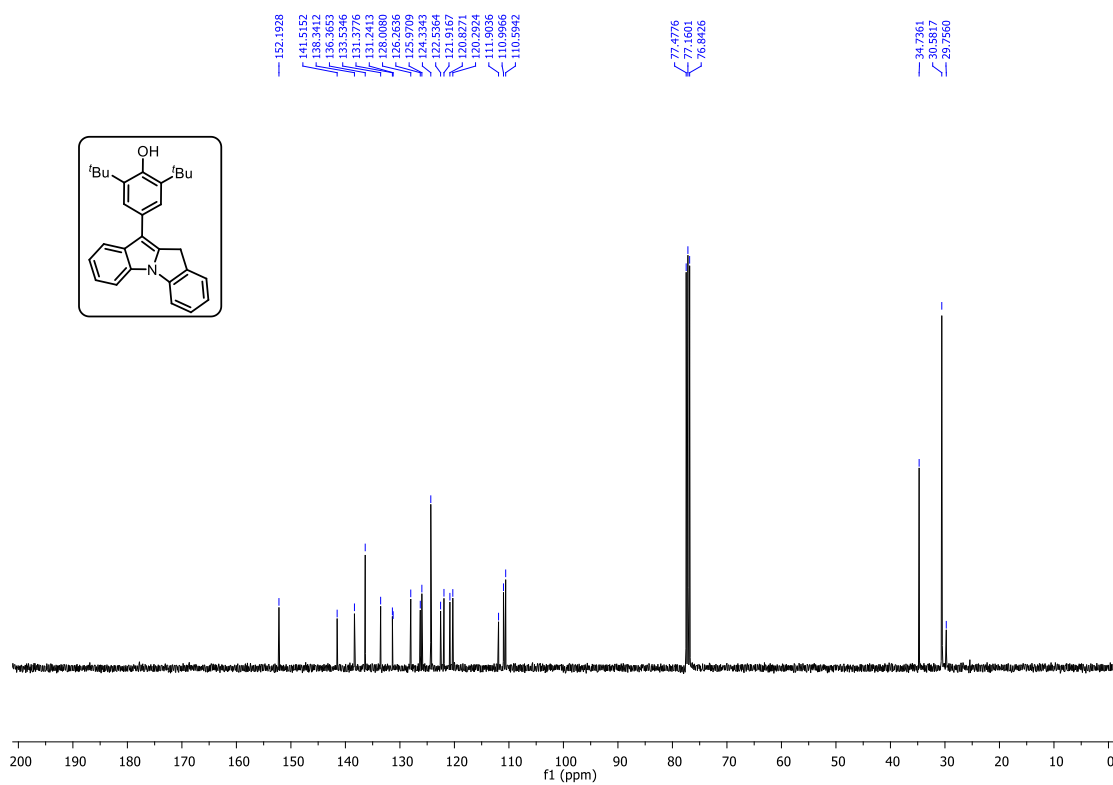



<sup>1</sup>H NMR (400 MHz, CDCl<sub>3</sub>) spectrum of **6c**

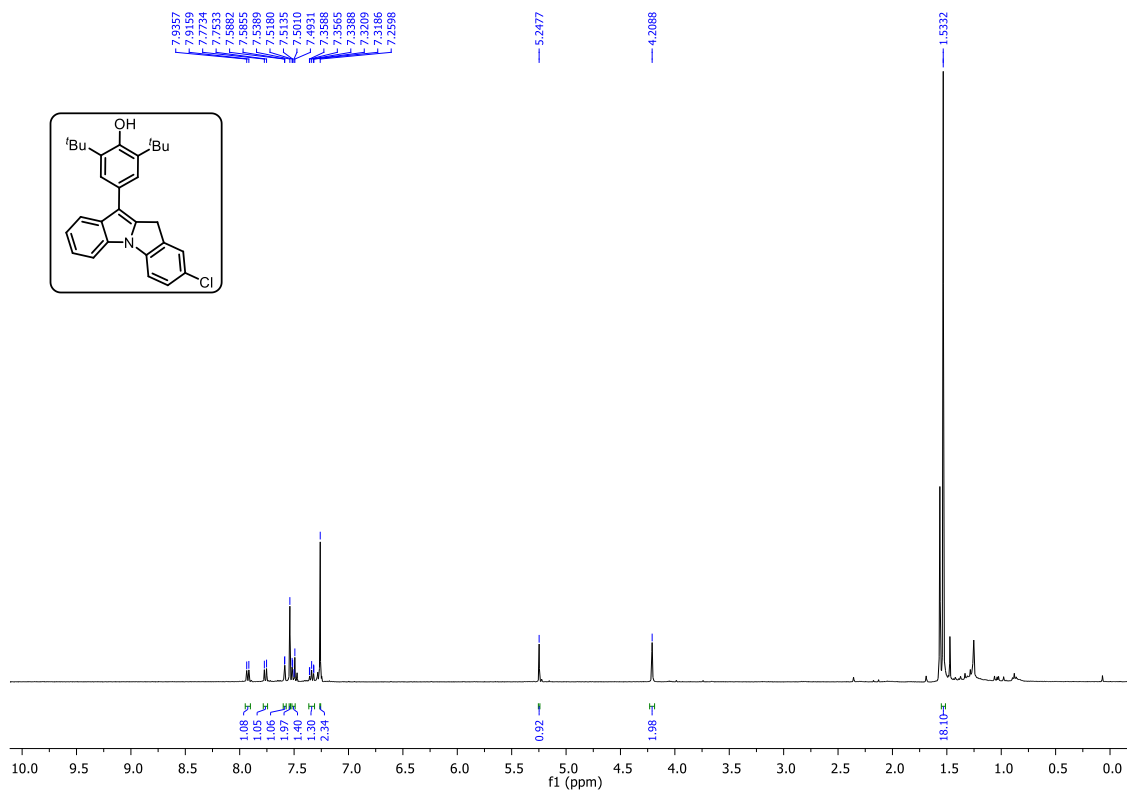

<sup>13</sup>C NMR (100 MHz, CDCl<sub>3</sub>) spectrum of **6c**

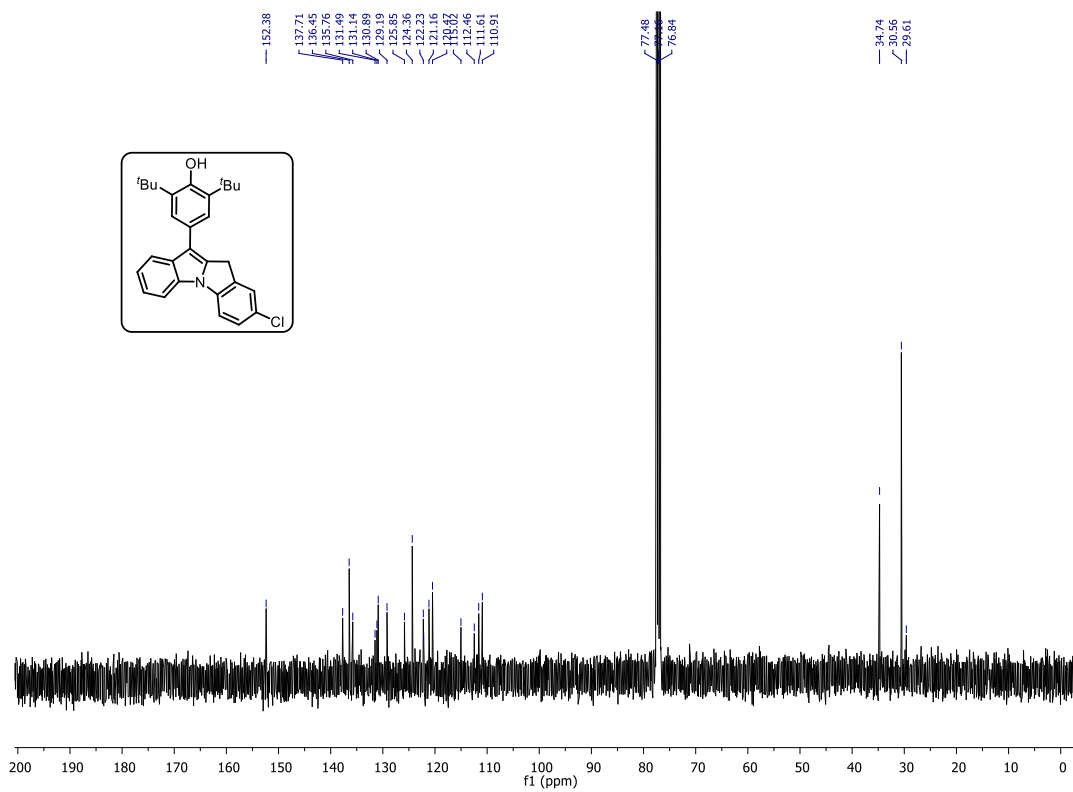

<sup>1</sup>H NMR (400 MHz, CDCl<sub>3</sub>) spectrum of **6d**

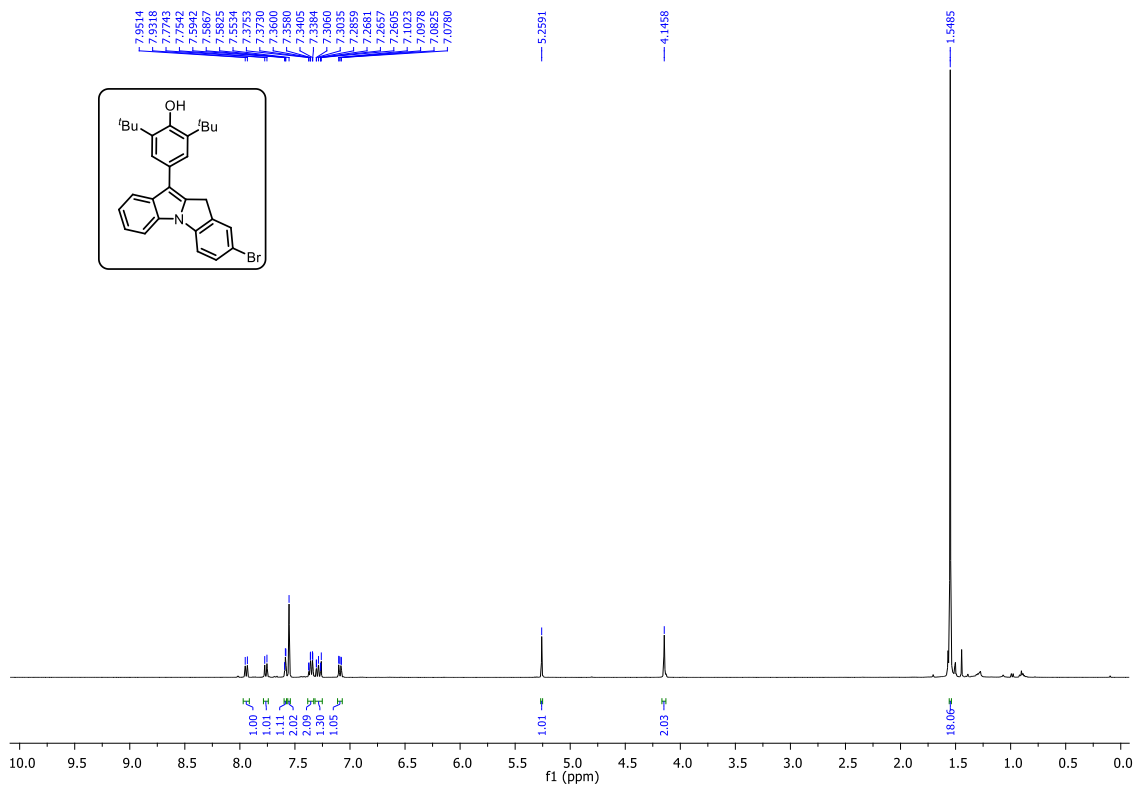

<sup>13</sup>C NMR (100 MHz, CDCl<sub>3</sub>) spectrum of **6d**

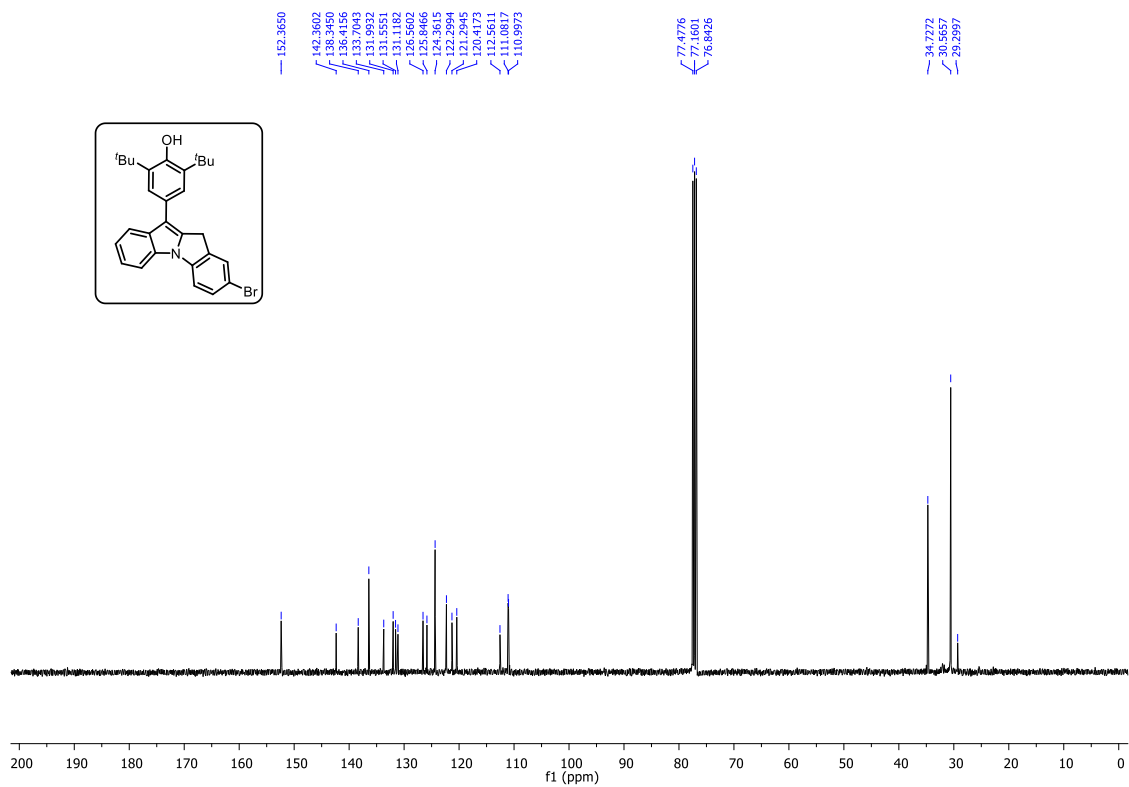

<sup>1</sup>H NMR (400 MHz, CDCl<sub>3</sub>) spectrum of **6e**

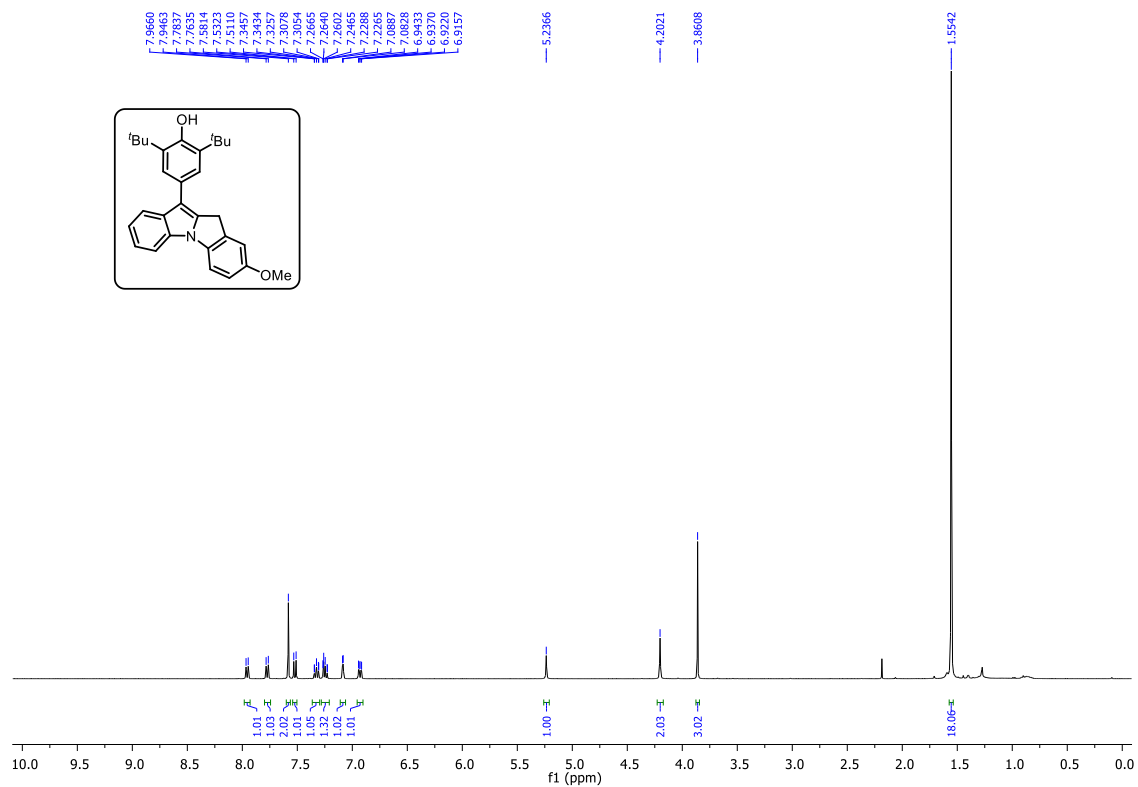

<sup>13</sup>C NMR (100 MHz, CDCl<sub>3</sub>) spectrum of **6e**

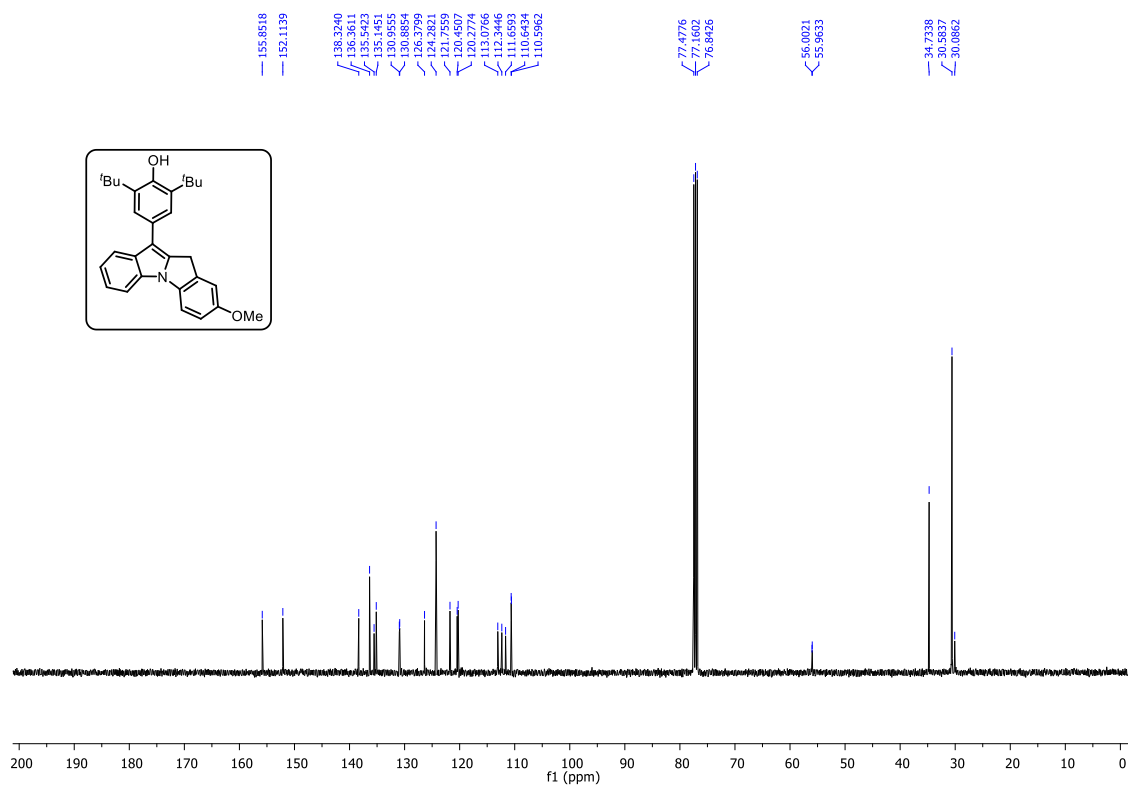

<sup>1</sup>H NMR (400 MHz, CDCl<sub>3</sub>) spectrum of **7a**

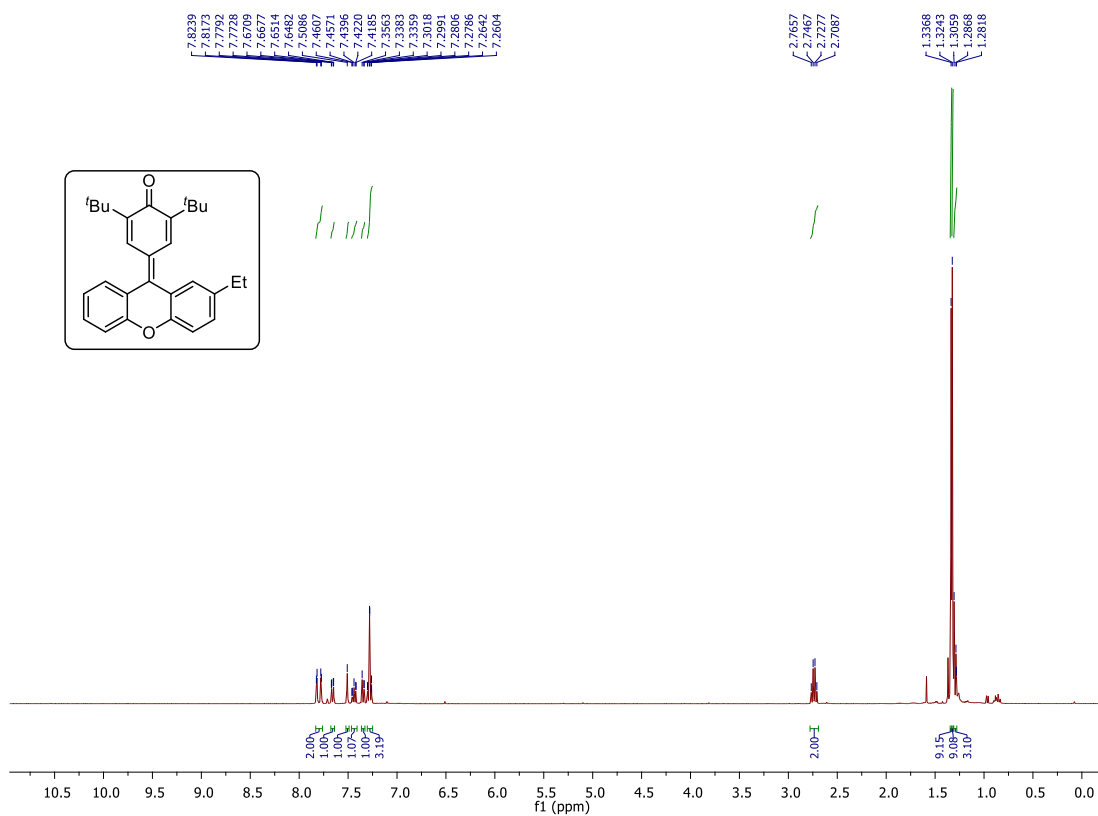

<sup>13</sup>C {<sup>1</sup>H} NMR (100 MHz, CDCl<sub>3</sub>) spectrum of **7a**

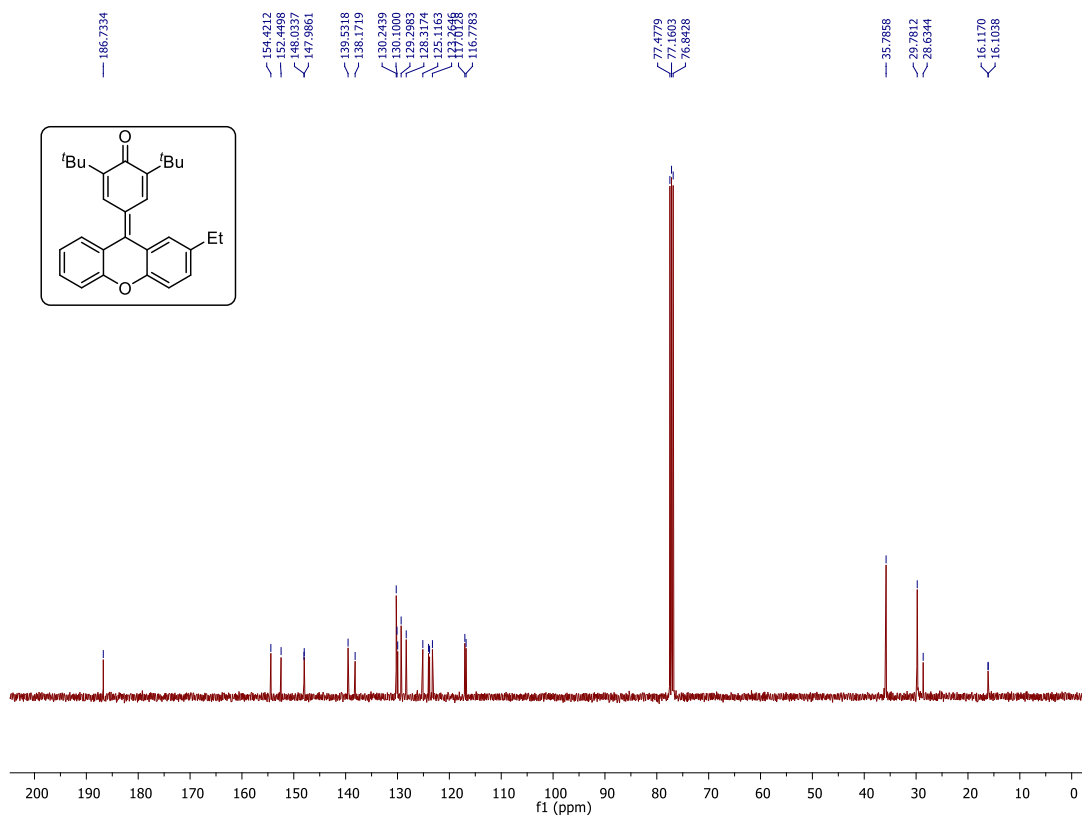

$^1\text{H}$  NMR (400 MHz,  $\text{CDCl}_3$ ) spectrum of **8a**

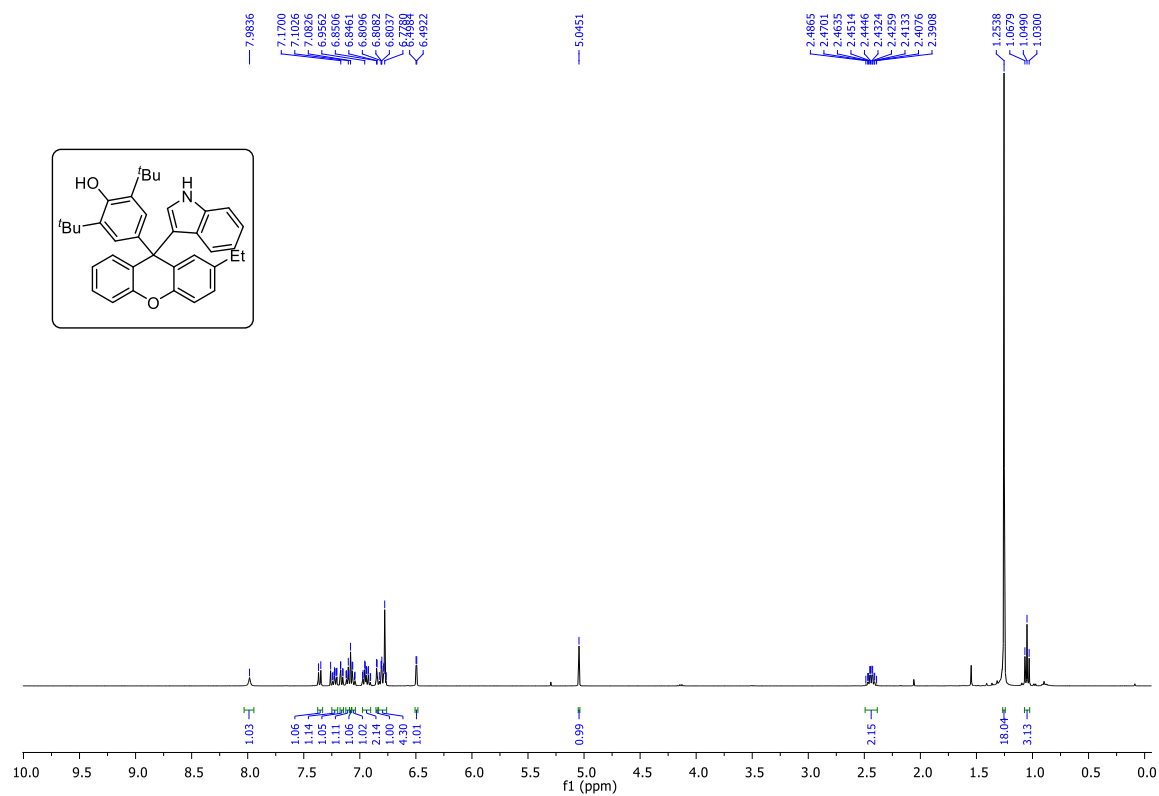

$^{13}\text{C}$   $\{^1\text{H}\}$  NMR (100 MHz,  $\text{CDCl}_3$ ) spectrum of **8a**

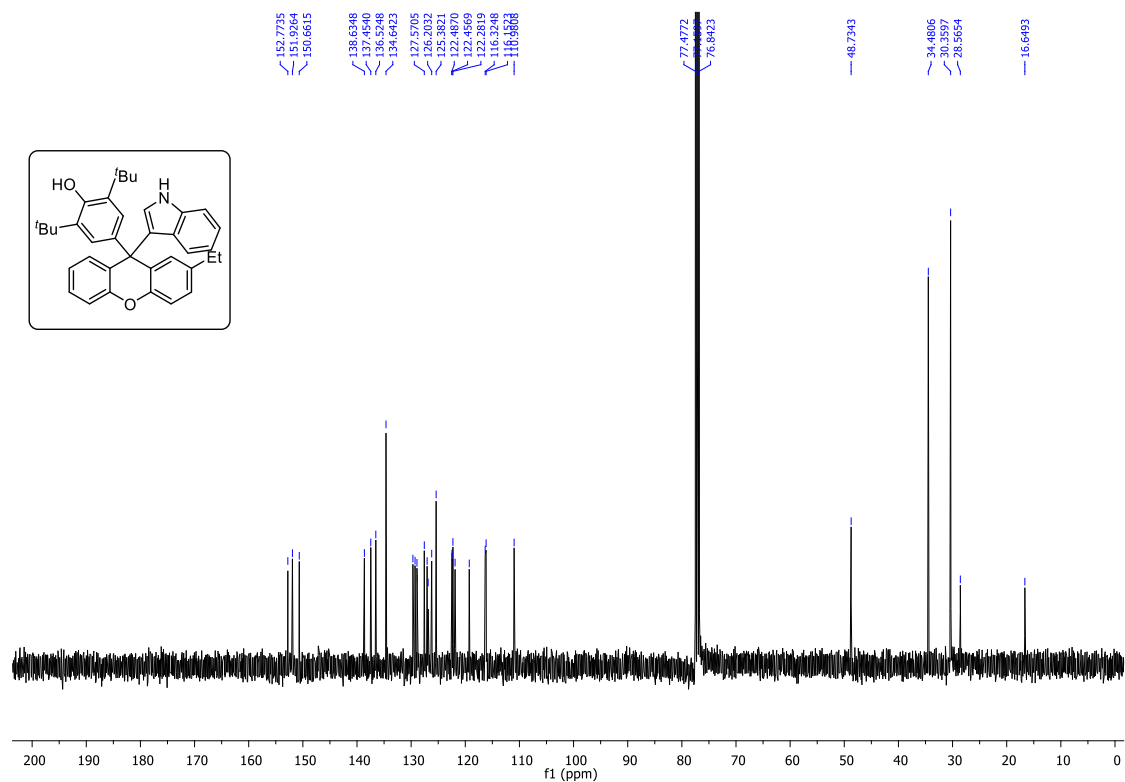

<sup>1</sup>H NMR (400 MHz, CDCl<sub>3</sub>) spectrum of **9a**

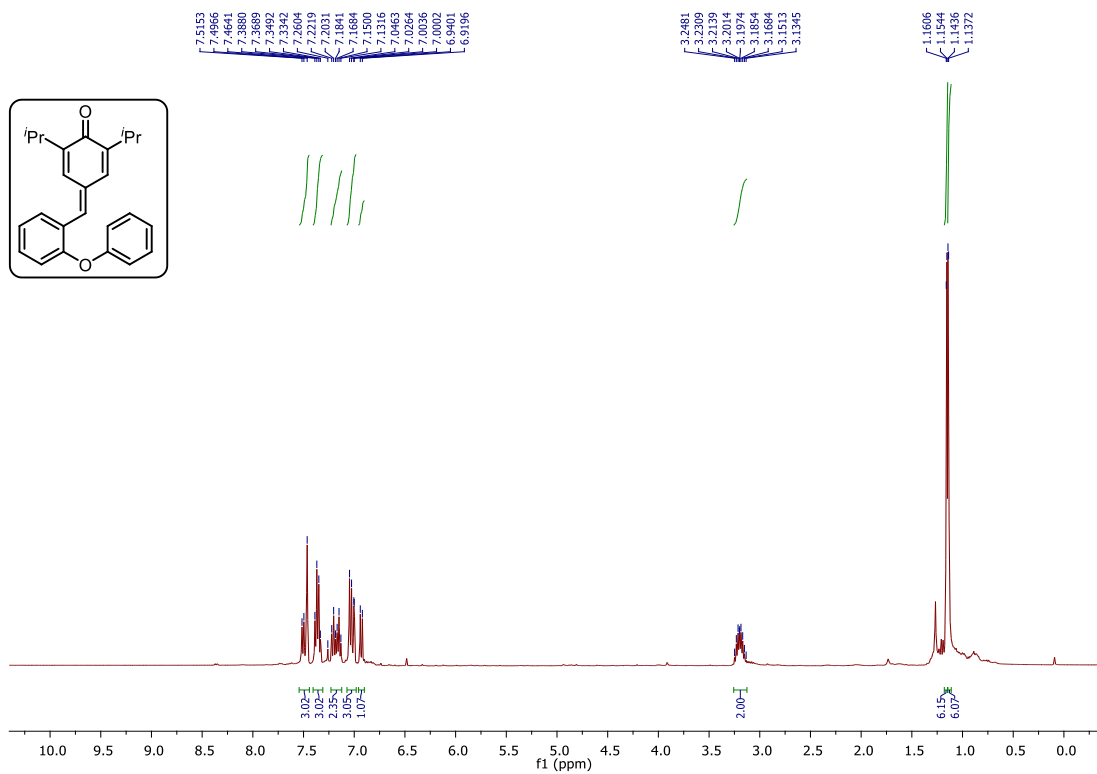

<sup>13</sup>C {<sup>1</sup>H} NMR (100 MHz, CDCl<sub>3</sub>) spectrum of **9a**

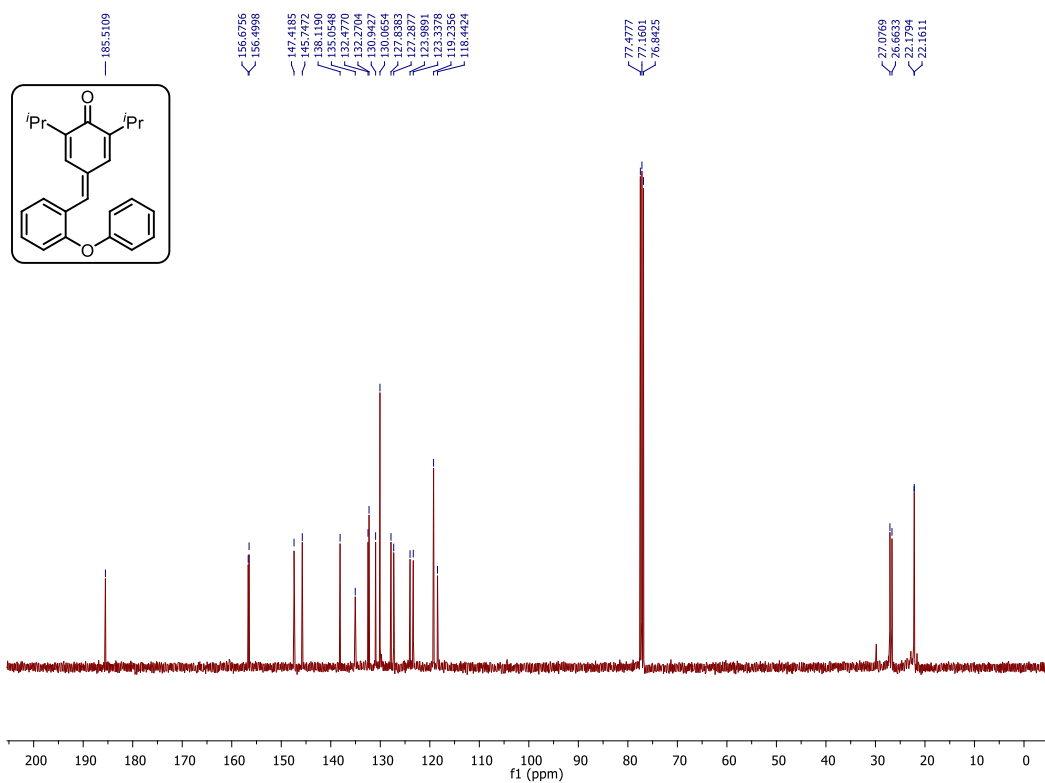



$^1\text{H}$  NMR (400 MHz,  $\text{CDCl}_3$ ) spectrum of **10a**

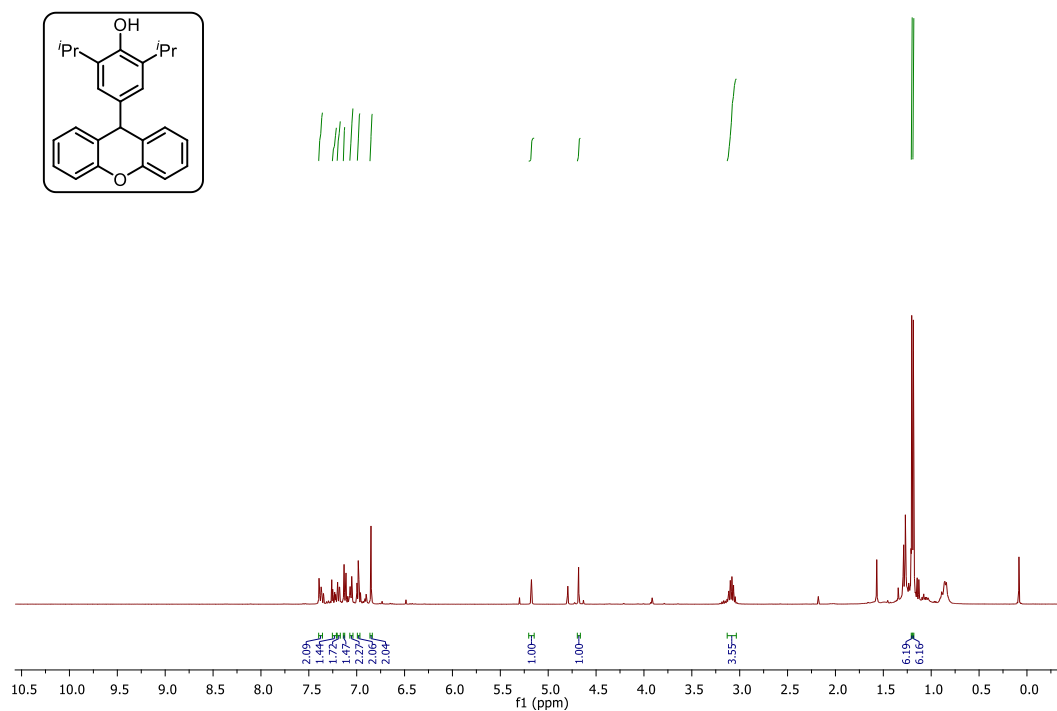

$^{13}\text{C}$   $\{^1\text{H}\}$  NMR (100 MHz,  $\text{CDCl}_3$ ) spectrum of **10a**

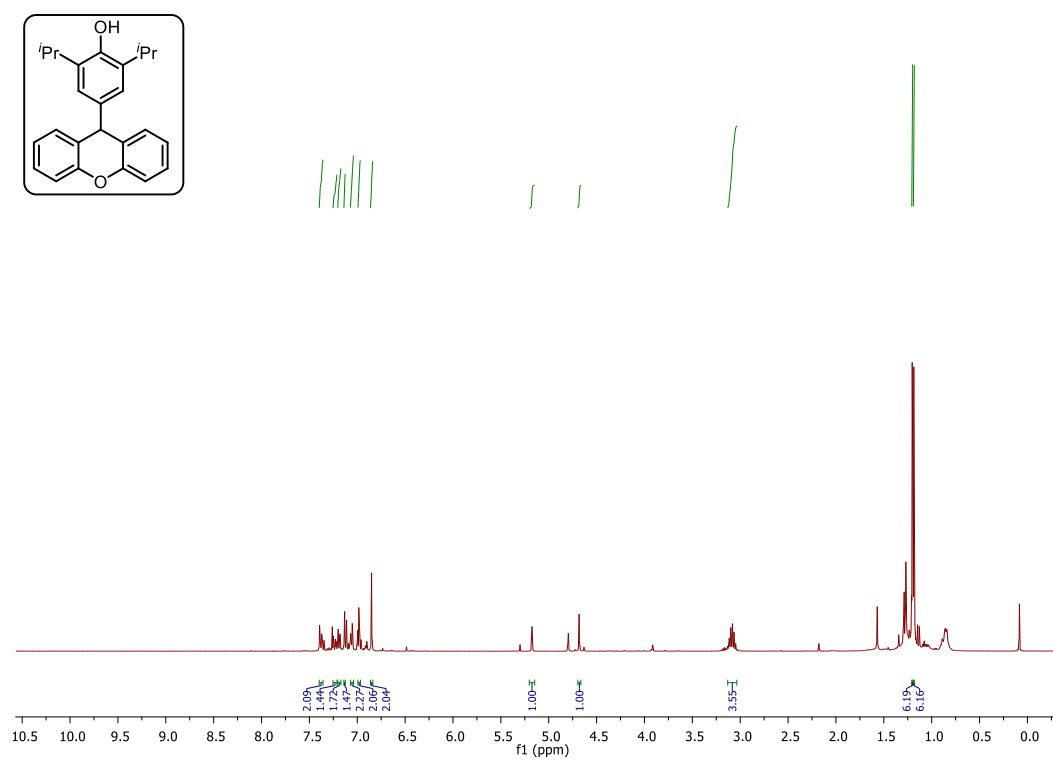

Supplement: d3ob00502j1.pdf [file d3ob00502j1.pdf]
